# Supplementary material for: Climate Assessment of US Endangered Species Improves, Actions Still Lag
Source: Research Square preprint supplement (doi:10.21203/rs.3.rs-2869805/v1), 2023-06-14
Supplement: Supplementary file 1 [file 08176c823ee2ba1b9a57b3a5.xlsx]

## Sheet: Delach_et_al_2019_discussion_da
ID	Scientific_Name	Common_Name	Taxon	Subtaxon	Lead_Region	State	Threat	Threat_source	Threat_note	Threat_year	Action	Action_source	Action_note	Action_year	Comments
1	Accipiter striatus venator	Hawk, Puerto Rican sharp-shinned	Vertebrate	Bird	FWS Region 4: Southeast	PR	No	https://ecos.fws.gov/docs/recovery_plan/Puerto%20Rican%20Broad-Winged%20Hawk%20Recovery%20Plan%20Amendment.pdf		2019	No	https://ecos.fws.gov/docs/recovery_plan/Puerto%20Rican%20Broad-Winged%20Hawk%20Recovery%20Plan%20Amendment.pdf		2019
2	Achatinella mustelina	Snail, Oahu tree	Invertebrate	Mollusk	FWS Region 1: Pacific	HI	Yes	https://ecos.fws.gov/docs/recovery_plan/Achatinella_Final_Recovery_Plan_Amendment_20190807.pdf		2019	Study	https://ecos.fws.gov/docs/five_year_review/doc6253.pdf		2019
3	Acipenser brevirostrum	Sturgeon, shortnose	Vertebrate	Fish	NMFS: Marine	DE, FL, GA, ME, MD, MA, NJ, NY, NC, PA, RI, SC, VA	No	FWS Recovery Plan (http://ecos.fws.gov/docs/recovery_plan/sturgeon_shortnose_1.pdf)		1998	No	http://ecos.fws.gov/docs/recovery_plan/sturgeon_shortnose_1.pdf		1998
4	Acipenser oxyrinchus oxirinchus	Sturgeon, Atlantic	Vertebrate	Fish	NMFS: Marine	CT, DC , DE, FL, GA, MA, MD, ME, NC, NH, NJ, NY, PA, RI, SC, VA	Yes	https://www.federalregister.gov/documents/2017/08/17/2017-17207/endangered-and-threatened-species-designation-of-critical-habitat-for-the-endangered-new-york-bight	"exceedances of temperature tolerances and the sensitivity of sturgeon to low DO levels; these impacts will worsen as a result of global climate change and predicted warming of the U.S. Atlantic Coast."	2017	No	https://www.federalregister.gov/documents/2017/08/17/2017-17207/endangered-and-threatened-species-designation-of-critical-habitat-for-the-endangered-new-york-bight	"additional unoccupied habitat is not necessary in light of any anticipated impacts of climate change."	2017
5	Acipenser transmontanus	Sturgeon, white	Vertebrate	Fish	FWS Region 1: Pacific	AK, AZ, CA, ID, MT, OR, WA	Yes	https://ecos.fws.gov/docs/recovery_plan/Kootenai_River_White_Sturgeon_Revised_Recovery_Plan_20190923.pdf		2019	Study	https://ecos.fws.gov/docs/recovery_plan/Kootenai_River_White_Sturgeon_Revised_Recovery_Plan_20190923.pdf		2019
6	Acrocephalus familiaris kingi	Millerbird, Nihoa	Vertebrate	Bird	FWS Region 1: Pacific	HI	Yes	https://ecos.fws.gov/docs/tess/species_nonpublish/3821.pdf	New threat: "Climate change destruction or degradation of habitat"	2022	Study	https://ecos.fws.gov/docs/tess/species_nonpublish/3821.pdf	Climate change impacts poorly understood, research needed	2022
7	Acrocephalus luscinia	Warbler, nightingale reed	Vertebrate	Bird	FWS Region 1: Pacific	NMI	Yes	https://ecos.fws.gov/docs/five_year_review/doc6573.pdf	"some threats may be increasing, including storms, tsunamis, and sea level rise due to climate change"	2020	Study	http://ecos.fws.gov/docs/five_year_review/doc4541.pdf	The "new management action" for climate change is completion of high-resolution spatial analysis.	2015
8	Adelocosa anops	Spider, Kauai cave wolf or pe'e pe'e maka 'ole	Invertebrate	Arthropod	FWS Region 1: Pacific	HI	Yes	https://ecos.fws.gov/docs/tess/species_nonpublish/3812.pdf	"Climate change loss or degradation of habitat –prolonged drought"	2022	Yes	https://ecos.fws.gov/docs/recovery_plan/Final_KIRP_ThreatsRecovery.pdf	Climate change vulnerability assessment is a statewide recovery action, all species, as is development of climate change adaptation strategies.	2021
9	Aerodramus vanikorensis bartschi	Swiftlet, Mariana gray	Vertebrate	Bird	FWS Region 1: Pacific	GU, NMI	Yes	https://ecos.fws.gov/docs/recovery_plan/Mariana_Swiftlet_Final_Recovery_Plan_Amendment_20190820.pdf		2019	Yes	https://ecos.fws.gov/docs/recovery_plan/Mariana_Swiftlet_Final_Recovery_Plan_Amendment_20190820.pdf		2019	There was also a five-year review in 2020, which discussed climate change but had no additional actions. https://ecos.fws.gov/docs/five_year_review/doc6651.pdf
10	Agelaius xanthomus	Blackbird, yellow-shouldered	Vertebrate	Bird	FWS Region 4: Southeast	PR	No	https://ecos.fws.gov/docs/recovery_plan/Yellow-shouldered%20Blackbird%20Recovery%20Plan%20Amendment.pdf	Recovery Plan amendment mentions "increased frequency of intense hurricanes" but does not attribute those to a changing climate.	2019	No	https://ecos.fws.gov/docs/recovery_plan/Yellow-shouldered%20Blackbird%20Recovery%20Plan%20Amendment.pdf		2019
11	Alasmidonta atropurpurea	Elktoe, Cumberland	Invertebrate	Mollusk	FWS Region 4: Southeast	KY, TN	Yes	https://ecos.fws.gov/docs/tess/species_nonpublish/3755.pdf	"we consider climate change to be a potential threat to the persistence and long-term viability of remaining Cumberland elktoe populations."	2022	No	https://ecos.fws.gov/docs/tess/species_nonpublish/3755.pdf	Document recommends no change in endangered status or recovery priority. No actions mentioned, though.	2022
12	Alasmidonta heterodon	Mussel, dwarf wedge	Invertebrate	Mollusk	FWS Region 5: Northeast	CT, MD, MA, NH, NJ, NY, NC, PA, VT, VA	Yes	https://ecos.fws.gov/docs/tess/species_nonpublish/2774.pdf	Likely to be "extremely vulnerable" "as a result of increased heavy rainfall, drought, and temperature changes."	2019	No	https://ecos.fws.gov/docs/tess/species_nonpublish/2774.pdf	No climate specific actions	2019
13	Alasmidonta raveneliana	Elktoe, Appalachian	Invertebrate	Mollusk	FWS Region 4: Southeast	NC, TN	No	https://ecos.fws.gov/docs/tess/species_nonpublish/3854.pdf		2022	No	https://ecos.fws.gov/docs/tess/species_nonpublish/3854.pdf		2022
14	Amazona vittata	Parrot, Puerto Rican	Vertebrate	Bird	FWS Region 4: Southeast	PR	No	https://ecos.fws.gov/docs/tess/species_nonpublish/2387.pdf	No mention of climate change in 2017 Five-year review	2017	No	https://ecos.fws.gov/docs/tess/species_nonpublish/2387.pdf		2017	Brief mention in 2023 review, outside analysis time frame https://ecos.fws.gov/docs/tess/species_nonpublish/4086.pdf
15	Amblema neislerii	Three-ridge (mussel), fat	Invertebrate	Mollusk	FWS Region 4: Southeast	FL, GA	No	https://ecos.fws.gov/docs/recovery_plan/Fat%20Theeridge%20Recovery%20Plan%20Amendment.pdf		2019	No	https://ecos.fws.gov/docs/recovery_plan/Fat%20Theeridge%20Recovery%20Plan%20Amendment.pdf		2019
16	Ambystoma bishopi	Salamander, flatwoods reticulated	Vertebrate	Amphibian	FWS Region 4: Southeast	FL, GA	Yes	https://ecos.fws.gov/docs/recovery_plan/20210615_RETICULATED_Flatwoods_Salamander_RP.pdf	One mention of climate change as a threat (hydrologic)	2021	Yes	https://ecos.fws.gov/docs/five_year_review/doc4617.pdf	Five-year review (2015) describes SLR threat and the efffects of drought and severe precipitation on ephemeral wetlands. Recommends captive breeding and "assisted metamorphosis" to help guard against stochastic events like a drought or hurricane.	2015	No actions in 2021 recovery plan
17	Ambystoma californiense	Salamander, California tiger	Vertebrate	Amphibian	FWS Region 8: Pacific Southwest	CA	Yes	https://ecos.fws.gov/docs/tess/species_nonpublish/3762.pdf	Discusses drought	2022	Study	https://ecos.fws.gov/docs/tess/species_nonpublish/3762.pdf	"Evaluate SB CTS population- and individual-level responses to drought and climate change, especially as both forces influence pond filling and water-retention rates, as well as vernal pool abundance and distribution to inform management of existing and created ponds; determine the best management actions to address climate change related threats."	2022	Santa Barbara County DPS. There was also a 2021 Review for the Sonoma DPS that was a yes/no
18	Ambystoma macrodactylum croceum	Salamander, Santa Cruz long-toed	Vertebrate	Amphibian	FWS Region 8: Pacific Southwest	CA	No	https://ecos.fws.gov/docs/five_year_review/doc6283.pdf		2019	No	https://ecos.fws.gov/docs/five_year_review/doc6283.pdf		2019
19	Ambystoma tigrinum stebbinsi	Salamander, Sonoran tiger	Vertebrate	Amphibian	FWS Region 2: Southwest	AZ	No	https://ecos.fws.gov/docs/recovery_plan/Final%20RP%20Amendment_Sonoran%20tiger%20salamander_508%20Compliant.pdf		2019	No	https://ecos.fws.gov/docs/recovery_plan/Final%20RP%20Amendment_Sonoran%20tiger%20salamander_508%20Compliant.pdf		2019
20	Ameiva polops	Lizard, St. Croix ground	Vertebrate	Reptile	FWS Region 4: Southeast	VI	Yes	https://ecos.fws.gov/docs/recovery_plan/St.%20Croix%20Ground%20Lizard%20Recovery%20Plan%20Amendment.pdf		2019	Study	https://ecos.fws.gov/docs/five_year_review/doc6202.pdf	Five-year review recommends assessment of climate effects, but no climate related actions in the Recovery Plan amendment.	2019
21	Ammodramus maritimus mirabilis	Sparrow, Cape Sable seaside	Vertebrate	Bird	FWS Region 4: Southeast	FL	Yes	https://ecos.fws.gov/docs/recovery_plan/Cape%20Sable%20Seaside%20Sparrow%20Recovery%20Plan%20Amendment.pdf		2019	Yes	https://ecos.fws.gov/docs/recovery_plan/Cape%20Sable%20Seaside%20Sparrow%20Recovery%20Plan%20Amendment.pdf		2019
22	Ammodramus savannarum floridanus	Sparrow, Florida grasshopper	Vertebrate	Bird	FWS Region 4: Southeast	FL	No	https://ecos.fws.gov/docs/recovery_plan/Florida%20Grasshopper%20Sparrow%20Recovery%20Plan%20Amendment_1.pdf		2019	No	https://ecos.fws.gov/docs/recovery_plan/Florida%20Grasshopper%20Sparrow%20Recovery%20Plan%20Amendment_1.pdf		2019
23	Anaea troglodyta floridalis	Butterfly, Florida leafwing	Invertebrate	Arthropod	FWS Region 4: Southeast	FL	Yes	http://www.gpo.gov/fdsys/pkg/FR-2014-08-12/pdf/2014-18614.pdf	Listing decision by FWS discusses climate change (especially salinity changes, SLR and changes to fire regime).	2014	Yes	http://www.gpo.gov/fdsys/pkg/FR-2014-08-12/pdf/2014-18611.pdf	2014 Critical Habitat designation emphasized resilience to sea-level rise.	2014
24	Anas laysanensis	Duck, Laysan	Vertebrate	Bird	FWS Region 1: Pacific	HI	Yes	https://ecos.fws.gov/docs/tess/species_nonpublish/3824.pdf	"New Threats: Climate change destruction or degradation of habitat"	2022	Yes	http://ecos.fws.gov/docs/five_year_review/doc4430.pdf	Discussed as a new threat in 2014 Five-year review: "Climate change degradation of habitat – Climate change is a threat to this species as it currently occurs only on low lying islands vulnerable to sea level rise, storm surge, and tsunamis." Responding with translocations and disaster contingency planning.	2014	No actions in 2022 Review
25	Anas wyvilliana	Duck, Hawaiian	Vertebrate	Bird	FWS Region 1: Pacific	HI	Yes	https://ecos.fws.gov/docs/tess/species_nonpublish/3490.pdf	"Climate change is believed to pose a threat to this species."	2021	No	https://ecos.fws.gov/docs/tess/species_nonpublish/3490.pdf		2021
50	Anaxyrus (fmr. Bufo) californicus	Toad, arroyo	Vertebrate	Amphibian	FWS Region 8: Pacific Southwest	CA	Yes	https://www.govinfo.gov/content/pkg/FR-2011-02-09/pdf/2011-1703.pdf#page=1	Discussed in critical habitat designation.	2011	Yes	https://www.govinfo.gov/content/pkg/FR-2011-02-09/pdf/2011-1703.pdf#page=1	Areas important under climate change are included in designation.	2011
26	Anaxyrus baxteri	Toad, Wyoming	Vertebrate	Amphibian	FWS Region 6: Mountain Prairie	WY	No	https://ecos.fws.gov/docs/five_year_review/doc6106.pdf		2019	No	https://ecos.fws.gov/docs/five_year_review/doc6106.pdf		2019
471 (2022)	Anaxyrus williamsi	Toad, Dixie Valley	Vertebrate	Amphibian	FWS Region 8: Pacific Southwest	NV	Yes	https://www.govinfo.gov/content/pkg/FR-2022-12-02/pdf/2022-26237.pdf#page=1	Detailed discussion in listing decision	2022	N/A	https://ecos.fws.gov/ecp/species/10635	Very recent listing, no other documents.	2022
27	Antilocapra americana sonoriensis	Pronghorn, Sonoran	Vertebrate	Mammal	FWS Region 2: Southwest	AZ	Yes	https://ecos.fws.gov/docs/recovery_plan/FINAL%20Sonoran%20Pronghorn%20Recovery%20Plan,%202nd%20Revision%2011.16.16.pdf	2016 recovery plan includes fairly detailed projections of effects in the Southwest, with particular emphasis on the impacts on drought and on forage quality. Recovery plan increases target abundances for several populations to buffer the population in light of potential climate change effects. Emphasizes need to maintain natural and supplemental water sources, because of climate change.	2016	Yes	https://ecos.fws.gov/docs/recovery_plan/FINAL%20Sonoran%20Pronghorn%20Recovery%20Plan,%202nd%20Revision%2011.16.16.pdf	2016 recovery plan includes fairly detailed projections of effects in the Southwest, with particular emphasis on the impacts on drought and on forage quality. Recovery plan increases target abundances for several populations to buffer the population in light of potential climate change effects. Emphasizes need to maintain natural and supplemental water sources, because of climate change.	2016	2018 Five-year review is only a page long and does not mention climate change
28	Antrobia culveri	Cavesnail, Tumbling Creek	Invertebrate	Mollusk	FWS Region 3: Midwest	MO	Yes	https://ecos.fws.gov/docs/tess/species_nonpublish/3655.pdf	temp. & precip.	2022	Yes	https://ecos.fws.gov/docs/tess/species_nonpublish/3655.pdf	"The Ozark Underground Lab has not conducted any climate change studies in Tumbling Creek Cave; however, they work to increase resilience to climate change by protecting and maintaining intact terrestrial communities on the surface. The degree to which negative effects of climate change will be offset by positive effects on other life history features remains uncertain. Further monitoring and res…	2022
29	Aplodontia rufa nigra	Mountain beaver, Point Arena	Vertebrate	Mammal	FWS Region 8: Pacific Southwest	CA	Yes	https://ecos.fws.gov/docs/five_year_review/doc6109.pdf		2019	Study	https://ecos.fws.gov/docs/five_year_review/doc6109.pdf		2019
30	Apodemia mormo langei	Butterfly, Lange's metalmark	Invertebrate	Arthropod	FWS Region 8: Pacific Southwest	CA	Yes	https://ecos.fws.gov/docs/recovery_plan/RP%20Amendment_AntiochDunes.pdf		2019	Study	https://ecos.fws.gov/docs/recovery_plan/RP%20Amendment_AntiochDunes.pdf		2019	There was also a five-year review in 2020, which discussed climate change but had no additional actions. https://ecos.fws.gov/docs/five_year_review/doc6578.pdf
31	Arkansia wheeleri	Pocketbook, Ouachita rock	Invertebrate	Mollusk	FWS Region 2: Southwest	AR, OK	Yes	https://ecos.fws.gov/docs/tess/species_nonpublish/2583.pdf	"The ORP exhibits multiple, clear vulnerabilities to the range of effects predicted as a part of future climate change. Despite variation in severity of effects predicted under alternative modeling scenarios, overall trends indicate that climate change will pose an increasing threat to the ORP."	2018	Yes	https://ecos.fws.gov/docs/tess/species_nonpublish/2583.pdf	Increase riparian reforestation to reduce evaporation.	2018
32	Assiminea pecos	Snail, Pecos assiminea	Invertebrate	Mollusk	FWS Region 2: Southwest	NM, TX	Yes	https://ecos.fws.gov/docs/recovery_plan/Final%20Recovery%20Plan%20Four%20Invertebrates%20of%20Pecos%20River%20Valley_1.pdf		2019	Yes	https://ecos.fws.gov/docs/recovery_plan/Final%20Recovery%20Plan%20Four%20Invertebrates%20of%20Pecos%20River%20Valley_1.pdf		2019	There was also a five-year review in 2020, which discussed climate change but had no additional actions. https://ecos.fws.gov/docs/five_year_review/doc6398.pdf
33	Athearnia anthonyi	Riversnail, Anthony's	Invertebrate	Mollusk	FWS Region 4: Southeast	AL, GA, TN	No	https://ecos.fws.gov/docs/tess/species_nonpublish/3366.pdf	Recovery plan is from 1997. 2011, 2018 Five-year review does not mention climate change.	2018	No	https://ecos.fws.gov/docs/tess/species_nonpublish/3366.pdf	Recovery plan is from 1997. 2011, 2018 Five-year review does not mention climate change.	2018
34	Balaena glacialis	Whale, right	Vertebrate	Mammal	NMFS: Marine	CT, DE, FL, GA, ME, MD, MA, NJ, NY, NC, RI, SC, VA	Yes	https://media.fisheries.noaa.gov/2022-12/Sign2_NARW20225YearReview_508-GARFO.pdf	Extensive discussion in the NARW 2022 5-year review.	2022	Yes	http://ecos.fws.gov/docs/recovery_plan/whale_right_northatlantic.pdf	https://media.fisheries.noaa.gov/2022-12/Sign2_NARW20225YearReview_508-GARFO.pdf	2022
35	Balaena mysticetus	Whale, bowhead	Vertebrate	Mammal	NMFS: Marine	AK	No	https://www.fisheries.noaa.gov/species/bowhead-whale#management	No recovery information available.	1970	No	https://www.fisheries.noaa.gov/species/bowhead-whale#management	No recovery information available.	1970	No recovery plan, reviews, or critical habitat documents
36	Balaenoptera borealis	Whale, Sei	Vertebrate	Mammal	NMFS: Marine	CA, MA	Yes	https://repository.library.noaa.gov/view/noaa/32073	Five-year review describes possible impacts but mentions a lot of uncertainty.	2021	Study	https://repository.library.noaa.gov/view/noaa/32073	2011 Recovery plan rates "loss of prey base due to climate change" as an "unknown but potentiallly high" threat. 2021 5YR emphasizes need for research on effects to prey base and movement patterns	2021
37	Balaenoptera musculus	Whale, blue	Vertebrate	Mammal	NMFS: Marine	AK, CA, MA	Yes	https://repository.library.noaa.gov/view/noaa/27399	Changes to prey base are potentially a large threat.	2020	Yes	https://repository.library.noaa.gov/view/noaa/27399	"Conduct research and perform analyses to understand whether climate change is adversely affecting blue whale distribution, abundance, or fecundity. If found to be detrimental to blue whale distribution, abundance, or fecundity, take steps to minimize climate change impacts."	2020
38	Balaenoptera physalus	Whale, finback	Vertebrate	Mammal	NMFS: Marine	AL, AK, CA, CT, DE, FL, GA, LA, ME, MD, MA, MS, NH, NJ, NY, NC, PR, RI, SC, VA, VI	Yes	https://media.fisheries.noaa.gov/dam-migration/508_compliant_final_feb_2019_finwhale_5-year_review.pdf	2019 Five-year review discusses possible effects to prey base; currently unknown	2019	Study	https://media.fisheries.noaa.gov/dam-migration/508_compliant_final_feb_2019_finwhale_5-year_review.pdf	Research effects on copepods.	2019	aka fin whale
39	Batrachoseps aridus	Salamander, desert slender	Vertebrate	Amphibian	FWS Region 8: Pacific Southwest	CA	Yes	https://ecos.fws.gov/docs/five_year_review/doc6419.pdf	Climate change listed as a threat	2020	No	https://ecos.fws.gov/docs/five_year_review/doc6419.pdf		2020	There is also a 2019 "Supplemental Finding" stating that it is "not practicable to devlop objective, quantifiable recovery criteria. The document contains very little new information but does make reference to climate change having been identified as a threat in the 2014 five-year review. https://ecos.fws.gov/docs/recovery_plan/Not%20practicable_Desert%20Slender%20Salamander.pdf
40	Batrisodes texanus	Beetle, Coffin Cave mold	Invertebrate	Arthropod	FWS Region 2: Southwest	TX	No	https://ecos.fws.gov/docs/recovery_plan/Final%20RP%20Amendment%20Travis-Williamson%20Karst%20Inverts.pdf		2019	No	https://ecos.fws.gov/docs/recovery_plan/Final%20RP%20Amendment%20Travis-Williamson%20Karst%20Inverts.pdf		2019
41	Batrisodes venyivi	Beetle, Helotes mold	Invertebrate	Arthropod	FWS Region 2: Southwest	TX	Yes	https://ecos.fws.gov/docs/five_year_review/doc6544.pdf	"If surface temperature increases and longer dry periods and reduced soil moisture lead to changes in the climate of the deep cave zones, this could reduce or eliminate available habitat within occupied caves, thus affecting the Helotes mold beetle."	2020	Yes	http://ecos.fws.gov/docs/recovery_plan/Final%202001%20Bexar%20Co%20Invertebrates%20Rec%20Plan_1.pdf	Recovery action table says that all of their habitat protection & management and monitoring and research actions are aimed at addressing climate change (though they aren't specific about how.)	2011
42	Boloria acrocnema	Butterfly, Uncompahgre fritillary	Invertebrate	Arthropod	FWS Region 6: Mountain Prairie	CO	Yes	https://ecos.fws.gov/docs/tess/species_nonpublish/2604.pdf	Five-year review is mostly about climate change, including global and local effects. Main reason that downlisting criteria are not being met.	2018	Yes	https://ecos.fws.gov/docs/tess/species_nonpublish/2604.pdf	Possibly one of the only plans that says supporting reversing climate change is a recovery action.	2018
43	Bombus affinis	Rusty patched bumble bee	Invertebrate	Arthropod	FWS Region 3: Midwest	IA, IL, IN, MA, ME, MN, OH, VA, WI, WV	Yes	https://ecos.fws.gov/docs/tess/species_nonpublish/3911.pdf	Listed as a primary threat	2022	Yes	https://ecos.fws.gov/docs/recovery_plan/Final Recovery Plan _Rusty Patched Bumble Bee_2021.pdf	Ameliorating climate change threat is an objective. Also mentions climate change effects and how to alleviate those as a research need.	2021
466 (2021)	Bombus franklini	Bumble bee, Franklin's	Invertebrate	Arthropod	FWS Region 1: Pacific	CA, OR	Yes	https://ecos.fws.gov/docs/recovery_plan/Recovery_Outline_for_Franklins_Bumblebee_20211217.pdf	"Secondary threat" that may lead to decreased food availability.	2021	No	https://ecos.fws.gov/docs/recovery_plan/Recovery_Outline_for_Franklins_Bumblebee_20211217.pdf	No climate actions in the recovery outline	2021
44	Brachylagus idahoensis	Rabbit, pygmy	Vertebrate	Mammal	FWS Region 1: Pacific	WA	No	https://ecos.fws.gov/docs/recovery_plan/Pygmy_Rabbit_Final_Recovery_Plan_Amendment_20190807.pdf		2019	No	https://ecos.fws.gov/docs/recovery_plan/Pygmy_Rabbit_Final_Recovery_Plan_Amendment_20190807.pdf		2019	There was also a 2019 five-year review that did not mention climate. https://ecos.fws.gov/docs/five_year_review/doc6001.pdf
45	Branchinecta conservatio	Fairy shrimp, Conservancy	Invertebrate	Arthropod	FWS Region 8: Pacific Southwest	CA	Yes	https://ecos.fws.gov/docs/five_year_review/doc4012.pdf	2012 Five-year review has detailed discussion of impacts of climate change to vernal pool ecosystems. However, no actions to address are included.	2012	No	https://ecos.fws.gov/docs/five_year_review/doc4012.pdf	2012 Five-year review has detailed discussion of impacts of climate change to vernal pool ecosystems. However, no actions to address are included.	2012
46	Branchinecta longiantenna	Fairy shrimp, longhorn	Invertebrate	Arthropod	FWS Region 8: Pacific Southwest	CA	Yes	https://ecos.fws.gov/docs/tess/species_nonpublish/3969.pdf	"The most significant threat to longhorn fairy shrimp in the future is climate change and its impacts on vernal pool habitat."	2022	Yes	https://ecos.fws.gov/docs/tess/species_nonpublish/3969.pdf	"Consider reassessing longhorn fairy shrimp’s recovery criteria to account for climate change impacts." (Also assess the effect of climate change on vernal pool hydrology and species viability.)	2022
47	Branchinecta sandiegonensis	Fairy shrimp, San Diego	Invertebrate	Arthropod	FWS Region 8: Pacific Southwest	CA	Yes	https://ecos.fws.gov/docs/tess/species_nonpublish/3503.pdf	Listed as potential threat	2021	No	https://ecos.fws.gov/docs/tess/species_nonpublish/3503.pdf		2021
48 (Downlisted)	Branta sandvicensis	Goose, Hawaiian	Vertebrate	Bird	FWS Region 1: Pacific	HI									Downlisted to Threatened
49	Brychius hungerfordi	Beetle, Hungerford's crawling water	Invertebrate	Arthropod	FWS Region 3: Midwest	MI	Yes	https://ecos.fws.gov/docs/tess/species_nonpublish/948.pdf	"A predicted increase in the mean water temperature in July resulted in an increase in availability of suitable HCWB habitat."	2021	N/A (Not a threat)	https://ecos.fws.gov/docs/tess/species_nonpublish/948.pdf		2021
51	Bufo houstonensis	Toad, Houston	Vertebrate	Amphibian	FWS Region 2: Southwest	TX	Yes	https://ecos.fws.gov/docs/recovery_plan/Houston Toad Final Revised Recovery Plan_May 2022_508_RD signed.pdf	Drought and climate change discussed at length as Factor E threats, with downscaled projections. Also mentioned under Factor A.	2022	Yes	https://ecos.fws.gov/docs/recovery_plan/Houston Toad Final Revised Recovery Plan_May 2022_508_RD signed.pdf	3Rs in recovery strategy explicitly linked to climate threat. Specific recovery actions and criteria linked to climate change.	2022
52	Buteo platypterus brunnescens	Hawk, Puerto Rican broad-winged	Vertebrate	Bird	FWS Region 4: Southeast	PR	Yes	https://ecos.fws.gov/docs/five_year_review/doc6190.pdf	Five-year review discusses climate change in an appendix	2019	No	https://ecos.fws.gov/docs/recovery_plan/Puerto%20Rican%20Broad-Winged%20Hawk%20Recovery%20Plan%20Amendment.pdf		2019
53 (Delisted)	Buteo solitarius	Hawk, Hawaiian	Vertebrate	Bird	FWS Region 1: Pacific	HI						https://ecos.fws.gov/ecp/species/5509		2020	Delisted
54	Callophrys mossii bayensis	Butterfly, San Bruno elfin	Invertebrate	Arthropod	FWS Region 8: Pacific Southwest	CA	Yes	https://ecos.fws.gov/docs/tess/species_nonpublish/956.pdf	Listed as a threat	2021	Yes	https://ecos.fws.gov/docs/recovery_plan/APG%20amendment%20MBB%20SBEB.pdf		2019
55	Cambarus aculabrum	Crayfish, cave(1)	Invertebrate	Arthropod	FWS Region 4: Southeast	AR, MO	Yes	https://ecos.fws.gov/docs/tess/species_nonpublish/2722.pdf	Five-year review discusses climate change; recovery plan amendment (same year) does not.	2019	No	https://ecos.fws.gov/docs/recovery_plan/Cave%20Crayfish%20Recovery%20Plan%20Amendment.pdf		2019
467 (2021)	Cambarus cracens	Crayfish, slenderclaw	Invertebrate	Arthropod	FWS Region 4: Southeast	AL	No	https://ecos.fws.gov/docs/recovery_plan/Slenderclaw Crayfish Recovery Outline.pdf		2021	No	https://ecos.fws.gov/docs/recovery_plan/Slenderclaw Crayfish Recovery Outline.pdf		2021
56	Cambarus veteranus	Guyandotte River crayfish	Invertebrate	Arthropod	FWS Region 5: Northeast	WV	Yes	https://www.govinfo.gov/content/pkg/FR-2020-01-28/pdf/2020-01012.pdf#page=1	2020 Critical habitat designation proposed rule requests information on climate change.	2020	Yes	https://www.govinfo.gov/content/pkg/FR-2022-03-15/pdf/2022-04598.pdf#page=1	Designated unoccupied critical habitat to facilitate movement in response to climate change and other stressors.	2022
57	Cambarus zophonastes	Crayfish, cave(2)	Invertebrate	Arthropod	FWS Region 4: Southeast	AR	Yes	https://ecos.fws.gov/docs/tess/species_nonpublish/2697.pdf	Same language as in the C. aculabrum review.	2019	No	https://ecos.fws.gov/docs/tess/species_nonpublish/2697.pdf		2019
58	Campeloma decampi	Campeloma, slender	Invertebrate	Mollusk	FWS Region 4: Southeast	AL	Yes	https://ecos.fws.gov/docs/five_year_review/doc6346.pdf	"Climate change has the potential to increase the vulnerability of the campeloma to random catastrophic events, primarily through more intense or frequent droughts."	2020	No	https://ecos.fws.gov/docs/five_year_review/doc6346.pdf		2020
59	Canis lupus baileyi	Wolf, gray	Vertebrate	Mammal	FWS Region 2: Southwest	AZ, NM	Yes	https://ecos.fws.gov/docs/recovery_plan/Draft Mexican Wolf Recovery Plan Second Revision 2022.pdf	" (see our discussion at 80 FR 2488)"	2022	N/A (Not a threat)	https://ecos.fws.gov/docs/recovery_plan/Draft Mexican Wolf Recovery Plan Second Revision 2022.pdf	" (see our discussion at 80 FR 2488)"	2022
60	Canis rufus	Wolf, red	Vertebrate	Mammal	FWS Region 4: Southeast	NC, SC	Yes	https://ecos.fws.gov/docs/recovery_plan/Draft_Revised_Recovery_Plan_Red_Wolf_2022_1.pdf	Draft revised recovery plan has one sentence future habitat loss from sea level rise as a threat.	2022	No	https://ecos.fws.gov/docs/recovery_plan/Draft_Revised_Recovery_Plan_Red_Wolf_2022_1.pdf	Draft Revised Recovery Plan contains general info about 3Rs but does not explicitly connect to the SLR threat.	2022
61	Caprimulgus noctitherus	Nightjar, Puerto Rican	Vertebrate	Bird	FWS Region 4: Southeast	PR	No	https://ecos.fws.gov/docs/tess/species_nonpublish/3365.pdf	Not mentioned in 2012 or 2017 Five-year review	2017	No	https://ecos.fws.gov/docs/tess/species_nonpublish/3365.pdf	Not mentioned in 2012 or 2017Five-year review	2017
62	Caretta caretta	Turtle, Loggerhead sea	Vertebrate	Reptile	FWS Region 4: Southeast	AL , FL, GA, LA, MS, NC, SC, TX, VA	Yes	https://media.fisheries.noaa.gov/dam-migration/np_loggerhead_5yr_review_final.pdf	Detailed discussion in 2020 Five-year review (discusses various climate impacts on foraging, nesting, juvenile success, etc.)	2020	Yes	https://media.fisheries.noaa.gov/dam-migration/np_loggerhead_5yr_review_final.pdf	2009 Recovery Plan revision discusses climate change and contains actions expicitly aimed at better understanding and ameliorating its effects. 2020 Five-year review includes "Incorporate ecologically sound techniques to alleviate impacts from climate change.	2020	This is the most recent document for the North Pacific DPS, which is listed as E.
63	Catostomus discobulus yarrowi	Sucker, Zuni bluehead	Vertebrate	Fish	FWS Region 2: Southwest	AZ, NM	Yes	https://ecos.fws.gov/docs/five_year_review/doc6681.pdf	"climate change impacts including reduced water availability and higher water temperatures continue to be a threat."	2020	No	https://ecos.fws.gov/docs/five_year_review/doc6681.pdf		2020
64	Charadrius melodus	Plover, piping	Vertebrate	Bird	FWS Region 5: Northeast	AL, AR, CO, CT, DE, FL, GA, IA, IL, IN, KS, KY, LA, MA, MD, ME, MI, MN, MO, MS, MT, NC, ND, NE, NH, NJ, NY, OH, OK, PA, RI, SC, SD, TN, TX, VA, WI, WY	Yes	https://ecos.fws.gov/docs/five_year_review/doc6378.pdf	Several climate change-related threats listed	2020	Yes	https://ecos.fws.gov/docs/five_year_review/doc6378.pdf	"Develop strategies to reduce threats from the potential for water level decreases, or increases associated with climate change. Identify sites most likely to maintain or increase areas of suitable piping plover habitat under different climate change scenarios."	2020
65	Chasiempis sandwichensis ibidis	Elepaio, Oahu	Vertebrate	Bird	FWS Region 1: Pacific	HI	Yes	https://ecos.fws.gov/docs/five_year_review/doc6276.pdf	One mention	2019	No	https://ecos.fws.gov/docs/five_year_review/doc6276.pdf		2019
66	Chasmistes brevirostris	Sucker, shortnose	Vertebrate	Fish	FWS Region 8: Pacific Southwest	CA, OR	Yes	https://ecos.fws.gov/docs/five_year_review/doc6183.pdf	Brief mention: "It is difficult to predict accurately how such climatic changes will affect the shortnose sucker."	2019	No	https://ecos.fws.gov/docs/five_year_review/doc6183.pdf		2019	There is also an SSA from 2019 which discusses climate threat. https://ecos.fws.gov/ServCat/DownloadFile/164020
67	Chasmistes cujus	Cui-ui	Vertebrate	Fish	FWS Region 8: Pacific Southwest	NV	No	http://ecos.fws.gov/docs/recovery_plan/920515a.pdf	Recovery plan from 1992 says climate change is "beyond the scope of this analysis"; no other documents available.	1992	No	http://ecos.fws.gov/docs/recovery_plan/920515a.pdf	Recovery plan from 1992 says climate change is "beyond the scope of this analysis"; no other documents available.	1992
68 (Downlisted)	Chasmistes liorus	Sucker, June	Vertebrate	Fish	FWS Region 6: Mountain Prairie	UT		https://www.govinfo.gov/content/pkg/FR-2021-01-04/pdf/2020-27833.pdf#page=1	Downlisting final rule mentions that climate change is a new threat not discussed at time of listing.			https://www.govinfo.gov/content/pkg/FR-2021-01-04/pdf/2020-27833.pdf#page=1	Final rule for downlisting discusses that changes to reservoir flows and additional water acquisitions may be necessary.		Downlisted to Threatened (proposed in 2019 and finalized in 1/4/2021)
69	Chelonia mydas	Sea turtle, green	Vertebrate	Reptile	FWS Region 4: Southeast	FL	Yes	http://ecos.fws.gov/docs/five_year_review/doc1078.pdf	2007 Five-year review discusses various threats, but includes no recommended actions.	2007	No	http://ecos.fws.gov/docs/five_year_review/doc1078.pdf	2007 Five-year review discusses various threats, but includes no recommended actions.	2007
134	Chilabothrus (fmr. Epicrates) inornatus	Boa, Puerto Rican	Vertebrate	Reptile	FWS Region 4: Southeast	PR	Yes	https://www.govinfo.gov/link/fr/87/41641	Listed as a threat, but "we do not anticipate that climate change will have population-level effects on the species in the foreseeable future."	2022	N/A (Not a threat)	https://www.govinfo.gov/link/fr/87/41641	A proposed delisting, not a 5-year review	2022	Genus name changed to Chilabothrus. Proposed for delisting in 2022.
135	Chilabothrus (fmr. Epicrates) monensis granti	Boa, Virgin Islands tree	Vertebrate	Reptile	FWS Region 4: Southeast	VI	Yes	https://ecos.fws.gov/docs/recovery_plan/Virgin%20Island%20Tree%20Boa%20Recovery%20Plan%20Amendment_1.pdf		2019	No	https://www.govinfo.gov/content/pkg/FR-2020-09-30/pdf/2020-19027.pdf	Proposed for downlisting to Threatened in 2020. Document states: "We also did not explicitly consider the impacts of climate change (other than SLR and hurricane storm surges) on boas and their habitat.	2020	Genus name changed to Chilabothrus. In 2021, the comment period was reopened. No classification change to date.
70	Chrosomus saylori	Dace, laurel	Vertebrate	Fish	FWS Region 4: Southeast	TN	Yes	https://ecos.fws.gov/docs/tess/species_nonpublish/3240.pdf	drought	2021	No	https://ecos.fws.gov/docs/tess/species_nonpublish/3240.pdf		2021
71	Cicindela nevadica lincolniana	Tiger beetle, Salt Creek	Invertebrate	Arthropod	FWS Region 6: Mountain Prairie	NE	Yes	https://ecos.fws.gov/docs/recovery_plan/SCTB%20Signed%20Final%20Recovery%20Plan.pdf	2017 Recovery plan: one mention under Factor E: "Climate change may also affect the Salt Creek tiger beetle through a gradual warming and drying trend in the Midwest resulting in the loss of saline wetland and seep habitats." No additional detail or actions.	2017	No	https://ecos.fws.gov/docs/tess/species_nonpublish/3950.pdf		2022	2022 doc does not mention climate change at all.
72	Cicindela ohlone	Tiger beetle, Ohlone	Invertebrate	Arthropod	FWS Region 8: Pacific Southwest	CA	No	https://ecos.fws.gov/docs/five_year_review/doc6296.pdf		2019	No	https://ecos.fws.gov/docs/five_year_review/doc6296.pdf		2019
73	Cicindelidia floridana	Miami tiger beetle	Invertebrate	Arthropod	FWS Region 4: Southeast	FL	Yes	https://ecos.fws.gov/docs/tess/species_nonpublish/3815.pdf	"Climate change and sea level rise are major concerns."	2022	Yes	https://www.govinfo.gov/content/pkg/FR-2021-09-07/pdf/2021-19088.pdf#page=1	Proposed critical habitat says climate change may be a special management consideration.	2021
74	Cicurina baronia	Meshweaver, Robber Baron Cave	Invertebrate	Arthropod	FWS Region 2: Southwest	TX	Yes	https://ecos.fws.gov/docs/five_year_review/doc6605.pdf	"If surface temperature increases and longer dry periods and reduced soil moisture lead to changes in the climate of the deep cave zones, this could reduce or eliminate available habitat within occupied caves"	2020	Yes	http://ecos.fws.gov/docs/recovery_plan/Final%202001%20Bexar%20Co%20Invertebrates%20Rec%20Plan_1.pdf	2011 Recovery plan discusses changes to hydrology and above-ground vegetation; Recovery action table says that all of their habitat protection & management and monitoring and research actions are aimed at addressing climate change (though they aren't specific about how.)	2011
75	Cicurina madla	Meshweaver, Madla's Cave	Invertebrate	Arthropod	FWS Region 2: Southwest	TX	Yes	https://ecos.fws.gov/docs/five_year_review/doc6168.pdf		2019	Yes	https://ecos.fws.gov/docs/five_year_review/doc6168.pdf		2011
76 (Delisted)	Cicurina venii	Meshweaver, Braken Bat Cave	Invertebrate	Arthropod	FWS Region 2: Southwest	TX									delisted 2022
77	Cicurina vespera	Meshweaver, Government Canyon Bat Cave	Invertebrate	Arthropod	FWS Region 2: Southwest	TX	Yes	https://ecos.fws.gov/docs/five_year_review/doc6156.pdf		2019	No	https://ecos.fws.gov/docs/five_year_review/doc6156.pdf		2019
78	Colinus virginianus ridgwayi	Bobwhite, masked	Vertebrate	Bird	FWS Region 2: Southwest	AZ	Yes	https://ecos.fws.gov/docs/recovery_plan/Final%20RP%20Amendment_masked%20bobwhite_508%20Compliant.pdf		2019	Yes	https://ecos.fws.gov/docs/recovery_plan/Final%20RP%20Amendment_masked%20bobwhite_508%20Compliant.pdf		2019
81	Corvus kubaryi	Crow, Mariana	Vertebrate	Bird	FWS Region 1: Pacific	GU, NMI	No	https://ecos.fws.gov/docs/five_year_review/doc6632.pdf		2020	No	https://ecos.fws.gov/docs/five_year_review/doc6632.pdf		2020
82	Corynorhinus townsendii ingens	Bat, Ozark big-eared	Vertebrate	Mammal	FWS Region 2: Southwest	AR, MO, OK	Yes	https://ecos.fws.gov/docs/five_year_review/doc6682.pdf	Multiple effects listed; e.g. "Climate change could have an effect on the suitability of Ozark big-eared bat caves for roosting and hibernation, influence the timing of spring emergence and pup rearing, and impact prey availability."	2020	No	https://ecos.fws.gov/docs/five_year_review/doc6682.pdf		2020
83	Corynorhinus townsendii virginianus	Bat, Virginia big-eared	Vertebrate	Mammal	FWS Region 5: Northeast	KY, NC, VA, WV	No	https://ecos.fws.gov/docs/five_year_review/doc5958.pdf		2019	No	https://ecos.fws.gov/docs/recovery_plan/20190313_Draft%20VBEB%20Recovery%20Plan%20Amendment.pdf	Climate not mentioned in either the 2019 recovery plan amendment or the five-year review.	2019
84	Cottus specus	Sculpin, grotto	Vertebrate	Fish	FWS Region 3: Midwest	MO	Yes	https://ecos.fws.gov/docs/tess/species_nonpublish/3553.pdf	Listed as potential threat	2021	No	https://ecos.fws.gov/docs/tess/species_nonpublish/3553.pdf	No recovery plan written	2021
85	Crenichthys baileyi baileyi	Springfish, White River	Vertebrate	Fish	FWS Region 8: Pacific Southwest	NV	Yes	http://ecos.fws.gov/docs/five_year_review/doc4129.pdf	Five-year review (2012) discusses climate change generally and lists some potential impacts to species, but emphasizes uncertainty: "While we recognize that climate change is an important issue with potential effects to listed species and their habitats, we lack adequate information to make accurate predictions regarding its effects to particular species at this time. Our concern with this threat…	2012	No	https://ecos.fws.gov/docs/tess/species_nonpublish/3768.pdf		2022	2022 5-year review does not mention climate change at all.
86	Crenichthys baileyi grandis	Springfish, Hiko White River	Vertebrate	Fish	FWS Region 8: Pacific Southwest	NV	Yes	http://ecos.fws.gov/docs/five_year_review/doc4129.pdf	Five-year review (2012) discusses climate change generally and lists some potential impacts to species, but emphasizes uncertainty: "While we recognize that climate change is an important issue with potential effects to listed species and their habitats, we lack adequate information to make accurate predictions regarding its effects to particular species at this time. Our concern with this threat…	2012	No	https://ecos.fws.gov/docs/tess/species_nonpublish/3767.pdf		2022	2022 5-year review does not mention climate change at all.
463 (2021)	Cryptobranchus alleganiensis alleganiensis	Eastern Hellbender (Missouri DPS)	Vertebrate	Amphibian	FWS Region 3: Midwest	MO	Yes	https://ecos.fws.gov/docs/recovery_plan/Final Recovery Outline-Eastern Hellbender MO DPS 3-24-21_signed.pdf	Brief mention of climate change exacerbating flooding and drought.	2021	No	https://ecos.fws.gov/docs/recovery_plan/Final Recovery Outline-Eastern Hellbender MO DPS 3-24-21_signed.pdf		2021
87	Cryptobranchus alleganiensis bishopi	Hellbender, Ozark	Vertebrate	Amphibian	FWS Region 3: Midwest	AR, MO	Yes	https://ecos.fws.gov/docs/five_year_review/doc6401.pdf	Climate change could change hydrology and water temperature	2020	No	https://ecos.fws.gov/docs/recovery_plan/07.12.2021_Final Ozark Hellbender Recovery Plan_signed_508.pdf		2021
88	Crystallaria cincotta	Darter, diamond	Vertebrate	Fish	FWS Region 5: Northeast	WV	Yes	https://ecos.fws.gov/docs/five_year_review/doc6564.pdf	"climate change has the potential to increase the diamond darter’s vulnerability to random catastrophic events, and to compound effects of restricted genetic variation and population isolation"	2020	Yes	http://www.gpo.gov/fdsys/pkg/FR-2013-08-22/pdf/2013-20449.pdf	Critical habitat designation emphasizes uncertainty about which areas are best suited under climate change; attempting to address through resiliency and redundancy.	2012
89	Cumberlandia monodonta	Spectaclecase	Invertebrate	Mollusk	FWS Region 3: Midwest	AL, AR, IL, IA, KS, KY, MN, MO, VA, WV, WI	Yes	https://ecos.fws.gov/docs/five_year_review/doc6103.pdf		2019	No	https://ecos.fws.gov/docs/five_year_review/doc6103.pdf		2019
90	Cyclargus (=Hemiargus) thomasi bethunebakeri	Butterfly, Miami blue	Invertebrate	Arthropod	FWS Region 4: Southeast	FL	Yes	http://www.gpo.gov/fdsys/pkg/FR-2012-04-06/pdf/2012-8088.pdf	The 2012 listing decision has climate-related sections on SLR under Factor A and stochastic events under Factor E. No other recovery documents available.	2012	N/A	http://www.gpo.gov/fdsys/pkg/FR-2012-04-06/pdf/2012-8088.pdf	The 2012 listing decision has climate-related sections on SLR under Factor A and stochastic events under Factor E. No other recovery documents available.	2012
91	Cyprinodon bovinus	Pupfish, Leon Springs	Vertebrate	Fish	FWS Region 2: Southwest	TX	Yes	https://ecos.fws.gov/docs/recovery_plan/Leon%20Springs%20Pupfish%20Supplemental%20Finding_1.pdf	Supplemental finding.	2019	N/A	https://ecos.fws.gov/docs/recovery_plan/Leon%20Springs%20Pupfish%20Supplemental%20Finding_1.pdf	Supplemental finding. No actions.	2019
92	Cyprinodon diabolis	Pupfish, Devils Hole	Vertebrate	Fish	FWS Region 8: Pacific Southwest	NV	Yes	https://ecos.fws.gov/docs/recovery_plan/DevilsHolePupfish%20Not%20Practicable.pdf	Supplemental finding that it remains impracticable to incorporate delisting criteria into the recovery plan. Mentions climate change once.	2019	N/A	https://ecos.fws.gov/docs/recovery_plan/DevilsHolePupfish%20Not%20Practicable.pdf	Supplemental finding. No actions.	2019
93	Cyprinodon elegans	Pupfish, Comanche Springs	Vertebrate	Fish	FWS Region 2: Southwest	TX	Yes	https://ecos.fws.gov/docs/recovery_plan/Comanche%20Springs%20Pupfish%20Supplemental%20Finding_1.pdf	Supplemental finding that it remains impracticable to incorporate delisting criteria into the recovery plan.	2019	N/A	https://ecos.fws.gov/docs/recovery_plan/Comanche%20Springs%20Pupfish%20Supplemental%20Finding_1.pdf	Supplemental finding. No actions.	2019
94	Cyprinodon macularius	Pupfish, desert	Vertebrate	Fish	FWS Region 2: Southwest	AZ, CA	Yes	https://ecos.fws.gov/docs/recovery_plan/20190926_Final%20RP%20Amend_desert%20pupfish.pdf		2019	No	https://ecos.fws.gov/docs/recovery_plan/20190926_Final%20RP%20Amend_desert%20pupfish.pdf		2019
95	Cyprinodon nevadensis mionectes	Pupfish, Ash Meadows Amargosa	Vertebrate	Fish	FWS Region 8: Pacific Southwest	NV	Yes	https://ecos.fws.gov/docs/five_year_review/doc6724.pdf	Climate change is likely to reduce spring flow	2020	No	https://ecos.fws.gov/docs/five_year_review/doc6724.pdf		2020
96	Cyprinodon nevadensis pectoralis	Pupfish, Warm Springs	Vertebrate	Fish	FWS Region 8: Pacific Southwest	NV	Yes	https://ecos.fws.gov/docs/tess/species_nonpublish/961.pdf	Reduced springflow	2021	No	https://ecos.fws.gov/docs/tess/species_nonpublish/961.pdf		2021
97	Cyprinodon radiosus	Pupfish, Owens	Vertebrate	Fish	FWS Region 8: Pacific Southwest	CA	Yes	https://ecos.fws.gov/docs/tess/species_nonpublish/3965.pdf	drought and reduced snowpack	2022	Yes	https://ecos.fws.gov/docs/tess/species_nonpublish/3965.pdf	"Reevaluate the Owens pupfish Conservation Areas for climate resiliency, long-term viability"	2022
98	Cyprogenia stegaria	Fanshell	Invertebrate	Mollusk	FWS Region 4: Southeast	AL, IL, IN, KY, OH, TN, VA, WV	No	https://ecos.fws.gov/docs/five_year_review/doc6042.pdf		2019	No	https://ecos.fws.gov/docs/five_year_review/doc6042.pdf		2019
99	Delphinapterus leucas	Whale, beluga	Vertebrate	Mammal	NMFS: Marine	AK	Yes	https://media.fisheries.noaa.gov/2022-09/cibw-5-year-review-2022.pdf	Five-year review emphasizes that more research is needed on climate impacts.	2022	Yes	http://www.fisheries.noaa.gov/pr/recovery/plans/draft_cib_recovery_plan_15may2015.pdf	Draft recovery plan addresses climate change by discussing how it will affect other existing threats, namely prey availability, disease, noise pollution (affected by pH), etc. Because it was done this way, the actions are not worded to explicitly include climate change, but it's implied.	2015
100	Deltistes luxatus	Sucker, Lost River	Vertebrate	Fish	FWS Region 8: Pacific Southwest	CA, OR	Yes	https://ecos.fws.gov/docs/five_year_review/doc6182.pdf		2019	No	https://ecos.fws.gov/docs/five_year_review/doc6182.pdf		2019	There was also a 2019 SSA, climate threat but no actions. https://ecos.fws.gov/ServCat/DownloadFile/164020
103	Dermochelys coriacea	Sea turtle, leatherback	Vertebrate	Reptile	FWS Region 4: Southeast	AL, AK, CA, CT, DE, FL, GA, HI, LA, ME, MD, MA, MS, NH, NJ, NY, NC, OR, PR, RI, SC, TX, VA, VI, WA	Yes	http://ecos.fws.gov/docs/five_year_review/doc4313.pdf	2013 Five-year review has a fairly extensive discussion of impacts to marine systems and nesting beaches. Notes that the recovery plan is dated and doesn't address climate change. Recommends that those plans be brought into conformance with the Services' Interim Recovery Planning Guidance.	2013	Yes	http://ecos.fws.gov/docs/five_year_review/doc4313.pdf	2013 Five-year review has a fairly extensive discussion of impacts to marine systems and nesting beaches. Notes that the recovery plan is dated and doesn't address climate change. Recommends that those plans be brought into conformance with the Services' Interim Recovery Planning Guidance.	2013
104	Dinacoma caseyi	June-beetle, Casey's	Invertebrate	Arthropod	FWS Region 8: Pacific Southwest	CA	Yes	https://ecos.fws.gov/docs/tess/species_nonpublish/3369.pdf	Increased frequency of major floods	2021	Study	https://ecos.fws.gov/docs/tess/species_nonpublish/3369.pdf	"Develop research to better characterize the effects of flood events"	2021
105	Dipodomys heermanni morroensis	Kangaroo rat, Morro Bay	Vertebrate	Mammal	FWS Region 8: Pacific Southwest	CA	Yes	https://ecos.fws.gov/docs/tess/species_nonpublish/3308.pdf	Listed as potential threat	2021	No	https://ecos.fws.gov/docs/tess/species_nonpublish/3308.pdf		2021
106	Dipodomys ingens	Kangaroo rat, giant	Vertebrate	Mammal	FWS Region 8: Pacific Southwest	CA	Yes	https://ecos.fws.gov/docs/five_year_review/doc6607.pdf	Climate change listed as a threat	2020	No	https://ecos.fws.gov/docs/five_year_review/doc6607.pdf		2020
107	Dipodomys merriami parvus	Kangaroo rat, San Bernardino Merriam's	Vertebrate	Mammal	FWS Region 8: Pacific Southwest	CA	Yes	https://ecos.fws.gov/docs/five_year_review/doc6417.pdf		2009	No	https://ecos.fws.gov/docs/five_year_review/doc6417.pdf		2020
108	Dipodomys nitratoides exilis	Kangaroo rat, Fresno	Vertebrate	Mammal	FWS Region 8: Pacific Southwest	CA	Yes	https://ecos.fws.gov/docs/five_year_review/doc6433.pdf		2009	No	https://ecos.fws.gov/docs/five_year_review/doc6433.pdf		2020
109	Dipodomys nitratoides nitratoides	Kangaroo rat, Tipton	Vertebrate	Mammal	FWS Region 8: Pacific Southwest	CA	Yes	https://ecos.fws.gov/docs/five_year_review/doc6442.pdf	"The previous 5-year review identified ... climate change as [a] threat"	2009	No	https://ecos.fws.gov/docs/five_year_review/doc6442.pdf		2020
110 (Downlisted)	Dipodomys stephensi	Kangaroo rat, Stephens'	Vertebrate	Mammal	FWS Region 8: Pacific Southwest	CA	Yes	https://www.govinfo.gov/content/pkg/FR-2022-02-17/pdf/2022-03317.pdf#page=1	"Minimal threat," "Appears to be resilient"	2022	No threat, no action needed	https://www.govinfo.gov/content/pkg/FR-2022-02-17/pdf/2022-03317.pdf#page=1		2022	Downlisted to threatened in 2022
111	Discus macclintocki	Snail, Iowa Pleistocene	Invertebrate	Mollusk	FWS Region 3: Midwest	IL, IA	Yes	https://ecos.fws.gov/docs/five_year_review/doc6375.pdf	Climate change listed as a threat	2020	Study	https://ecos.fws.gov/docs/five_year_review/doc4339.pdf	Five-year review (2013) has detailed discussion of climate threats to the species. Development of a climate model is one of the suggested actions (but not a priority one.)	2013
112	Dromus dromas	Pearlymussel, dromedary	Invertebrate	Mollusk	FWS Region 4: Southeast	AL, TN, VA	No	https://ecos.fws.gov/docs/five_year_review/doc6387.pdf		2020	No	https://ecos.fws.gov/docs/five_year_review/doc6387.pdf		2020
113	Drosophila aglaia	Pomace fly, [unnamed]	Invertebrate	Arthropod	FWS Region 1: Pacific	HI	Yes	https://ecos.fws.gov/docs/five_year_review/doc6056.pdf		2019	No	https://ecos.fws.gov/docs/five_year_review/doc6056.pdf		2019
114	Drosophila differens	Pomace fly, [unnamed]	Invertebrate	Arthropod	FWS Region 1: Pacific	HI	Yes	https://ecos.fws.gov/docs/recovery_plan/Hawaiian_Archipelago_Recovery_Plan_20221214.pdf	Checked in summary table as a "known threat to species, not itemized."	2022	Yes	https://ecos.fws.gov/docs/recovery_plan/Hawaiian_Archipelago_Recovery_Plan_20221214.pdf	Fire management should account for drought and climate change. Expand species range.	2022
115	Drosophila digressa	Fly, Hawaii picture-wing	Invertebrate	Arthropod	FWS Region 1: Pacific	HI	Yes	https://ecos.fws.gov/docs/recovery_plan/SIGNED%20-%20Hawaii%20Island%20dRP%20(20221108)_1.pdf	"The habitats of Drosophila digressa are likely to be negatively affected by changes in temperature, humidity, precipitation, and the frequency and severity of storms (Table 3; Clark et al. 2020, entire; Lowe et al. 2020, entire)."	2022	Yes	https://ecos.fws.gov/docs/recovery_plan/SIGNED%20-%20Hawaii%20Island%20dRP%20(20221108)_1.pdf	Incorporate climate change into fire management.	2022	There was also a 2020 five-year review that discussed threats and recommended finer scale models to identify future habitat. https://ecos.fws.gov/docs/five_year_review/doc6518.pdf
116	Drosophila hemipeza	Pomace fly, [unnamed]	Invertebrate	Arthropod	FWS Region 1: Pacific	HI	Yes	https://ecos.fws.gov/docs/five_year_review/doc6012.pdf		2019	No	https://ecos.fws.gov/docs/five_year_review/doc6012.pdf		2019
117	Drosophila heteroneura	Pomace fly, [unnamed]	Invertebrate	Arthropod	FWS Region 1: Pacific	HI	Yes	https://ecos.fws.gov/docs/recovery_plan/Hawaiian_Archipelago_Recovery_Plan_20221214.pdf	Checked in summary table as a "known threat to species, not itemized."	2022	Yes	https://ecos.fws.gov/docs/recovery_plan/Hawaiian_Archipelago_Recovery_Plan_20221214.pdf	Fire management should account for drought and climate change. Expand species range.	2022	There was also a 2020 five-year review that discussed threats and recommended finer scale models to identify future habitat. https://ecos.fws.gov/docs/five_year_review/doc6658.pdf
118	Drosophila montgomeryi	Pomace fly, [unnamed]	Invertebrate	Arthropod	FWS Region 1: Pacific	HI	Yes	https://ecos.fws.gov/docs/five_year_review/doc6013.pdf		2019	No	https://ecos.fws.gov/docs/five_year_review/doc6013.pdf		2019
119	Drosophila musaphila	Pomace fly, [unnamed]	Invertebrate	Arthropod	FWS Region 1: Pacific	HI	Yes	https://ecos.fws.gov/docs/recovery_plan/Final_KIRP_ThreatsRecovery.pdf	Climate change is a threat to most or all listed species in the plan.	2021	Yes	https://ecos.fws.gov/docs/recovery_plan/Final_KIRP_ThreatsRecovery.pdf	Climate change vulnerability assessment is a statewide recovery action, all species, as is development of climate change adaptation strategies.	2021	There is also a 2022 5-year review, which lists cliamte as a potential threat that needs further study.
120	Drosophila neoclavisetae	Pomace fly, [unnamed]	Invertebrate	Arthropod	FWS Region 1: Pacific	HI	Yes	https://ecos.fws.gov/docs/recovery_plan/Hawaiian_Archipelago_Recovery_Plan_20221214.pdf	Checked in summary table as a "known threat to species, not itemized."	2022	Yes	https://ecos.fws.gov/docs/recovery_plan/Hawaiian_Archipelago_Recovery_Plan_20221214.pdf	Fire management should account for drought and climate change. Expand species range.	2022
121	Drosophila obatai	Pomace fly, [unnamed]	Invertebrate	Arthropod	FWS Region 1: Pacific	HI	Yes	https://ecos.fws.gov/docs/five_year_review/doc6014.pdf		2019	No	https://ecos.fws.gov/docs/five_year_review/doc6014.pdf		2019
122	Drosophila ochrobasis	Pomace fly, [unnamed]	Invertebrate	Arthropod	FWS Region 1: Pacific	HI	Yes	https://ecos.fws.gov/docs/recovery_plan/Hawaiian_Archipelago_Recovery_Plan_20221214.pdf	Checked in summary table as a "known threat to species, not itemized." "Changes in environmental conditions that may result from climate change include increasing temperatures, decreasing precipitation, and increasing storm intensities. The habitats of these picture-wing fly species are likely to be affected by changes in temperature, humidity, and precipitation, as well as frequency and severity…	2022	Yes	https://ecos.fws.gov/docs/recovery_plan/Hawaiian_Archipelago_Recovery_Plan_20221214.pdf	Evaluate effects of climate change on microclimates and host-plant breeding interactions. Expand species range to new areas.	2022	There was also a 2020 five-year review that discussed threats and recommended finer scale models to identify future habitat. https://ecos.fws.gov/docs/five_year_review/doc6629.pdf
123	Drosophila sharpi	Fly, Hawaii picture-wing	Invertebrate	Arthropod	FWS Region 1: Pacific	HI	Yes	https://ecos.fws.gov/docs/recovery_plan/Final_KIRP_ThreatsRecovery.pdf	Climate change is a threat to most or all listed species in the plan.	2021	Yes	https://ecos.fws.gov/docs/recovery_plan/Final_KIRP_ThreatsRecovery.pdf	Climate change vulnerability assessment is a statewide recovery action, all species, as is development of climate change adaptation strategies.	2021	There is also a 2022 5-year review, which lists cliamte as a potential threat that needs further study.
124	Drosophila substenoptera	Pomace fly, [unnamed]	Invertebrate	Arthropod	FWS Region 1: Pacific	HI	Yes	https://ecos.fws.gov/docs/five_year_review/doc6055.pdf		2019	No	https://ecos.fws.gov/docs/five_year_review/doc6055.pdf		2019
125	Drosophila tarphytrichia	Pomace fly, [unnamed]	Invertebrate	Arthropod	FWS Region 1: Pacific	HI	Yes	https://ecos.fws.gov/docs/five_year_review/doc6015.pdf		2019	No	https://ecos.fws.gov/docs/five_year_review/doc6015.pdf		2019
126	Eleutherodactylus juanariveroi	Coqui llanero	Vertebrate	Amphibian	FWS Region 4: Southeast	PR	Yes	https://ecos.fws.gov/docs/recovery_plan/Coqui%20llanero%20Recovery%20Implementation%20Strategy.pdf	The Recovery Plan does not talk about climate change, but the Recovery Implementation Plan does (both 2019).	2019	Study	https://ecos.fws.gov/docs/recovery_plan/Coqui%20llanero%20Recovery%20Implementation%20Strategy.pdf		2019	There was also a 2019 Five-year review with the same results. https://ecos.fws.gov/docs/five_year_review/doc6086.pdf
127	Elliptio spinosa	Spinymussel, Altamaha	Invertebrate	Mollusk	FWS Region 4: Southeast	GA	Yes	https://ecos.fws.gov/docs/five_year_review/doc6066.pdf		2011	No	https://ecos.fws.gov/docs/five_year_review/doc6066.pdf		2019
128	Elliptio steinstansana	Spinymussel, Tar River	Invertebrate	Mollusk	FWS Region 4: Southeast	NC	Yes	https://ecos.fws.gov/docs/five_year_review/doc6756.pdf	"The multitude of effects of climate change has and will likely continue to impact the Tar River spinymussel."	2020	No	https://ecos.fws.gov/docs/recovery_plan/TarRiverSpinymussel%20Recovery%20Plan%20Amendment.pdf		2020	No actions in either the review or the recovery plan amendment.
129	Emballonura semicaudata rotensis	Pacific sheath-tailed Bat (Mariana ssp)	Vertebrate	Mammal	FWS Region 1: Pacific	MP	Yes	https://ecos.fws.gov/docs/recovery_plan/SIGNED%20-%20Mariana%20Islands%20dRP%20(20221129).pdf	Mentioned briefly as one of the threats.	2022	Yes	https://ecos.fws.gov/docs/recovery_plan/SIGNED%20-%20Mariana%20Islands%20dRP%20(20221129).pdf	"Climate change will likely increase the frequency and severity of typhoons. Thus, the Pacific sheath-tailed bat must be reestablished on multiple islands to limit its vulnerability to catastrophic events."	2022
130	Emballonura semicaudata semicaudata	Pacific sheath-tailed Bat	Vertebrate	Mammal	FWS Region 1: Pacific	AS	Yes	https://ecos.fws.gov/docs/recovery_plan/Recovery_Plan_5_American_Samoa_Species_20220419.pdf	Hurricanes. Discussed informationg gaps.	2021	Yes	https://ecos.fws.gov/docs/recovery_plan/Recovery_Plan_5_American_Samoa_Species_20220419.pdf	Use climate info to determine areas for additional populations.	2021	There is also a 2021 Five-year review that is also a yes/yes.
131	Emoia slevini	Slevin's skink	Vertebrate	Reptile	FWS Region 1: Pacific	GU, NMI	Yes	https://ecos.fws.gov/docs/recovery_plan/SIGNED%20-%20Mariana%20Islands%20dRP%20(20221129).pdf	Mentioned briefly as one of the threats.	2022	Yes	https://ecos.fws.gov/docs/recovery_plan/SIGNED%20-%20Mariana%20Islands%20dRP%20(20221129).pdf	"While having redundant and resilient populations distributed throughout a species’ range is a hallmark of most recovery criteria, the periodic and extremely destructive potential of typhoons, which will likely increase with climate change, indicates that conservation translocations will be particularly important to the recovery of 23 species." Also mentions modeling and adaptive management.	2022	There was also a 2019 Five-year review with the same results. https://ecos.fws.gov/docs/five_year_review/doc6549.pdf
132	Empetrichthys latos	Poolfish, Pahrump	Vertebrate	Fish	FWS Region 8: Pacific Southwest	NV	No	https://ecos.fws.gov/docs/tess/species_nonpublish/2674.pdf	Five-year review has long but general discussion of climate change, concluding: "While we recognize that climate change is an important issue with potential effects to listed species and their habitats, we lack adequate information to make accurate predictions regarding its effects to particular species at this time. "	2018	No	https://ecos.fws.gov/docs/tess/species_nonpublish/2674.pdf	No climate actions.	2018
133	Empidonax traillii extimus	Flycatcher, southwestern willow	Vertebrate	Bird	FWS Region 2: Southwest	AZ, CA, CO, NV, NM, TX, UT	Yes	https://ecos.fws.gov/docs/tess/species_nonpublish/2551.pdf	Extensive discussion in the 2017 Five-year review, focused on drought but also discusses interactions with other factors.	2017	No	https://ecos.fws.gov/docs/tess/species_nonpublish/2551.pdf	This 5YR has a concluding finding, but no new actions at all. Previous docs did not have climate actions either.	2017
136	Epioblasma brevidens	Combshell, Cumberlandian	Invertebrate	Mollusk	FWS Region 4: Southeast	AL, KY, MS, VA	No	https://ecos.fws.gov/docs/five_year_review/doc6288.pdf		2019	No	https://ecos.fws.gov/docs/five_year_review/doc6288.pdf		2019
137	Epioblasma capsaeformis	Mussel, oyster	Invertebrate	Mollusk	FWS Region 4: Southeast	AL, KY, NC, VA	No	https://ecos.fws.gov/docs/five_year_review/doc5972.pdf		2019	No	https://ecos.fws.gov/docs/five_year_review/doc5972.pdf		2019
138	Epioblasma florentina curtisii	Pearlymussel, Curtis	Invertebrate	Mollusk	FWS Region 3: Midwest	AR, MO	Yes	https://ecos.fws.gov/docs/tess/species_nonpublish/3231.pdf	Changes in temp. & hydrology	2021	No	https://ecos.fws.gov/docs/tess/species_nonpublish/3231.pdf		2021
139	Epioblasma florentina walkeri	Riffleshell, tan	Invertebrate	Mollusk	FWS Region 4: Southeast	KY, TN, VA	Yes	https://ecos.fws.gov/docs/tess/species_nonpublish/947.pdf	"Climate change will potentially have significant effects on tan riffleshell, its host fishes, and their habitats. Effects on freshwaters is already manifest in some impacts (e.g., higher temperatures, altered species ranges and phenology of aquatic organisms)"	2021	No	https://ecos.fws.gov/docs/tess/species_nonpublish/947.pdf		2021	=E. walkeri
140	Epioblasma obliquata obliquata	Catspaw, purple	Invertebrate	Mollusk	FWS Region 3: Midwest	AL, KY, OH	Yes	https://ecos.fws.gov/docs/five_year_review/doc6391.pdf	"The predicted impacts on streams include changes in the distribution of algae, plankton, and fish, as well as changes in water temperatures and oxygen levels."	2020	Yes	https://ecos.fws.gov/docs/five_year_review/doc6391.pdf	"Update recovery criteria to address climate change."	2020
141	Epioblasma obliquata perobliqua	Catspaw, white	Invertebrate	Mollusk	FWS Region 3: Midwest	IN, OH	Yes	http://ecos.fws.gov/docs/five_year_review/doc3316.29.10.pdf	The 2013 Five-yer review has a brief discussion: "Altered hydrology in rivers, increased frequency of extreme weather events, and a changing abundance and distribution of fish species have the potential to adversely affect this species. The magnitude of the climate change threat to the white cat’s paw pearly mussel may be severe since this species is only known to occur in a 3-mile reach of only …	2013	No	https://ecos.fws.gov/docs/tess/species_nonpublish/3232.pdf	The 2021 Five-year review is only 2 pages long and does not mention climate change. Species has not been detected since 1999.	2021
142	Epioblasma penita	Combshell, southern	Invertebrate	Mollusk	FWS Region 4: Southeast	AL, MS	No	https://ecos.fws.gov/docs/tess/species_nonpublish/3478.pdf		2021	No	https://ecos.fws.gov/docs/tess/species_nonpublish/3478.pdf		2021
143	Epioblasma torulosa rangiana	Riffleshell, northern	Invertebrate	Mollusk	FWS Region 5: Northeast	IN, KY, MI, OH, PA, WV	Yes	https://ecos.fws.gov/docs/five_year_review/doc6119.pdf		2019	No	https://ecos.fws.gov/docs/five_year_review/doc6119.pdf		2019
144	Epioblasma triquetra	Mussel, snuffbox	Invertebrate	Mollusk	FWS Region 3: Midwest	AL, AR, IL, IN, KY, MI, MN, MS, MO, OH, PA, VA, WV, WI	Yes	https://ecos.fws.gov/docs/tess/species_nonpublish/2680.pdf	Listing decision mentions climate change a few times, but tangentially a factor compounding other threats. 2018 Five-year review just mentions that climate change is still a threat.	2018	No	https://ecos.fws.gov/docs/tess/species_nonpublish/2680.pdf	No actions in the 2018 five-year review	2018
145	Eretmochelys imbricata	Sea turtle, hawksbill	Vertebrate	Reptile	FWS Region 4: Southeast	AL, AS, CT, DE, FL, GA, GU, HI, LA, ME, MD, MA, MS, NH, NJ, NY, NC, NMI, PR, RI, SC, TX, VA, VI	Yes	http://ecos.fws.gov/docs/five_year_review/doc4168.pdf	Five-year review (2013) discusses multiple potential climate change impacts (loss of nesting beaches, thermal sex ratios, loss of coral reefs, etc.). Recommends updating recovery plan to address these threats.	2013	Yes	http://ecos.fws.gov/docs/five_year_review/doc4168.pdf	Five-year review (2013) discusses multiple potential climate change impacts (loss of nesting beaches, thermal sex ratios, loss of coral reefs, etc.). Recommends updating recovery plan to address these threats.	2013
146	Eschrichtius robustus	Whale, gray	Vertebrate	Mammal	NMFS: Marine	AK	No	https://ecos.fws.gov/ecp0/profile/speciesProfile?spcode=A02P	No additional documents through end of 2022.	1999	No	https://ecos.fws.gov/ecp0/profile/speciesProfile?spcode=A02P	No additional documents through end of 2022.	1999	Note: https://media.fisheries.noaa.gov/2023-03/2023-Gray-Whale-WNP-DPS-5-Year-Review_508-compliant.pdf (has a few mentions of climate change, but after date cutoff)
147	Etheostoma akatulo	Darter, bluemask	Vertebrate	Fish	FWS Region 4: Southeast	TN	Yes	https://ecos.fws.gov/docs/five_year_review/doc6484.pdf	"climate change will likely result in increased rainfall, leading to increased runoff, higher river levels, and longer periods of spilling from dams. "	2020	No	https://ecos.fws.gov/docs/five_year_review/doc6484.pdf		2020
148	Etheostoma chermocki	Darter, vermilion	Vertebrate	Fish	FWS Region 4: Southeast	AL	Yes	https://ecos.fws.gov/docs/five_year_review/doc6203.pdf		2019	No	https://ecos.fws.gov/docs/five_year_review/doc6203.pdf		2019
149	Etheostoma chienense	Darter, relict	Vertebrate	Fish	FWS Region 4: Southeast	KY	Yes	https://www.govinfo.gov/content/pkg/FR-2022-03-03/pdf/2022-03315.pdf#page=1	Downlisting proposal says climate change is still a threat.	2022	Yes	https://ecos.fws.gov/docs/recovery_plan/null.pdf	4(d) rule accompanying downlisting proposal has restoration actions to counter stream warming.	2022	ECOS page lists a Draft Recovery Plan but has no link (URL is nul). Proposed for downlisting on 3Mar2022. (https://www.govinfo.gov/content/pkg/FR-2022-03-03/pdf/2022-03315.pdf#page=1). Downlisting not finalized as of Jan 2023.
150	Etheostoma etowahae	Darter, Etowah	Vertebrate	Fish	FWS Region 4: Southeast	GA	Yes	https://ecos.fws.gov/docs/tess/species_nonpublish/3518.pdf	"Climate change is expected to bring more extreme weather events, such as flooding and drought"	2021	No	https://ecos.fws.gov/docs/tess/species_nonpublish/3518.pdf		2021
151	Etheostoma fonticola	Darter, fountain	Vertebrate	Fish	FWS Region 2: Southwest	TX	Yes	https://ecos.fws.gov/docs/tess/species_nonpublish/950.pdf	"Climate models predict that droughts worse than the drought of record are likely to occur in the 21st century"	2021	Yes	https://ecos.fws.gov/docs/tess/species_nonpublish/950.pdf	"Revise Downlisting Criterion 1. Because future climate is expected to become drier in the region, a plan for aquifer management based on the drought of record is not protective of more severe droughts that have been projected by scientific studies. Future climate modeling should be used reevaluate the amount of groundwater that can sustainably be withdrawn during dry conditions expected in the f…	2021
152	Etheostoma moorei	Darter, yellowcheek	Vertebrate	Fish	FWS Region 4: Southeast	AR	Yes	https://ecos.fws.gov/docs/five_year_review/doc6068.pdf		2019	No	https://ecos.fws.gov/docs/five_year_review/doc6068.pdf		2019
153	Etheostoma nuchale	Darter, watercress	Vertebrate	Fish	FWS Region 4: Southeast	AL	No	https://ecos.fws.gov/docs/tess/species_nonpublish/4013.pdf		2022	No	https://ecos.fws.gov/docs/tess/species_nonpublish/4013.pdf		2022
154	Etheostoma osburni	Darter, candy	Vertebrate	Fish	FWS Region 5: Northeast	VA, WV	No	https://www.govinfo.gov/content/pkg/FR-2021-04-07/pdf/2021-06748.pdf#page=1	The only mention is that they got a comment about incorporating climate change.	2021	No	https://www.govinfo.gov/content/pkg/FR-2021-04-07/pdf/2021-06748.pdf#page=1		2021
155	Etheostoma percnurum	Darter, duskytail	Vertebrate	Fish	FWS Region 4: Southeast	KY, TN, VA	No	https://ecos.fws.gov/docs/tess/species_nonpublish/3358.pdf		2021	No	https://ecos.fws.gov/docs/tess/species_nonpublish/3358.pdf		2021
156	Etheostoma phytophilum	Darter, rush	Vertebrate	Fish	FWS Region 4: Southeast	AL	Yes	https://ecos.fws.gov/docs/five_year_review/doc6287.pdf		2019	No	https://ecos.fws.gov/docs/five_year_review/doc6287.pdf		2019
157	Etheostoma susanae	Darter, Cumberland	Vertebrate	Fish	FWS Region 4: Southeast	KY, TN	Yes	https://ecos.fws.gov/docs/recovery_plan/2019%20final%20Cumberland%20darter%20recovery%20plan.pdf		2019	No	https://ecos.fws.gov/docs/recovery_plan/2019%20final%20Cumberland%20darter%20recovery%20plan.pdf		2019
158	Etheostoma wapiti	Darter, boulder	Vertebrate	Fish	FWS Region 4: Southeast	AL, TN	Yes	https://ecos.fws.gov/docs/tess/species_nonpublish/3364.pdf	2017 Five-year review has one tentative mention that water withdrawals could increase if climate change increases droughts.	2017	No	https://ecos.fws.gov/docs/tess/species_nonpublish/3364.pdf	No climate related actions.	2017
159	Eua zebrina	Snail [no common name]	Invertebrate	Mollusk	FWS Region 1: Pacific	AS	Yes	https://ecos.fws.gov/docs/recovery_plan/Recovery_Plan_5_American_Samoa_Species_20220419.pdf	Hurricanes. Discussed informationg gaps.	2021	Yes	https://ecos.fws.gov/docs/recovery_plan/Recovery_Plan_5_American_Samoa_Species_20220419.pdf	Use climate info to determine areas for additional populations.	2021	A five-year review in 2021 was also a yes/yes
160	Eubalaena japonica	Whale, North Pacific right	Vertebrate	Mammal	NMFS: Marine	AK, CA, HI, OR	Yes	https://media.fisheries.noaa.gov/dam-migration/2018northpacificrightwhale5yrreview.pdf	2013 Recovery Plan discusses climate-related changes to prey base as a potential (unknown) threat; recommends research. 2017 Five-year review same.	2017	Study	https://media.fisheries.noaa.gov/dam-migration/2018northpacificrightwhale5yrreview.pdf	2013 Recovery Plan discusses climate-related changes to prey base as a potential (unknown) threat; recommends research. 2017 5YR same	2017
461 (2020 Listing)	Euchloe ausonides insulanus	Island Marble Butterfly	Invertebrate	Insect	FWS Region 1: Pacific	WA	Yes	https://ecos.fws.gov/docs/recovery_plan/Draft_Island_Marble_Butterfly_Recovery_Plan_20220606.pdf	Mentions SLR and storm surge driven by cliamte change.	2022	Study	https://ecos.fws.gov/docs/recovery_plan/Draft_Island_Marble_Butterfly_Recovery_Plan_20220606.pdf	Conduct research on the effects of climate change.	2022
161	Eucyclogobius newberryi	Goby, tidewater	Vertebrate	Fish	FWS Region 8: Pacific Southwest	CA	Yes	https://www.govinfo.gov/content/pkg/FR-2014-03-13/pdf/2014-05335.pdf#page=1	2014 downlisting proposal discusses climate threats and requests more information	2014	Yes	http://www.gpo.gov/fdsys/pkg/FR-2013-02-06/pdf/2013-02057.pdf	2013 Critical Habitat designation includes areas selected with SLR considerations in mind.	2013	Downlisting not finalized.
162	Eumetopias jubatus	Sea-lion, Steller	Vertebrate	Mammal	NMFS: Marine	AK	Yes	https://media.fisheries.noaa.gov/dam-migration/steller-sea-lion-5year-review-0220.pdf	2020 Five-year review has extensive discussion and states that climate related downlisting criteria have not been met.	2020	Yes	https://media.fisheries.noaa.gov/dam-migration/steller-sea-lion-5year-review-0220.pdf	Research and continue to implement Recovery plan (2008) management actions.	2020
163	Eumops floridanus	Bat, Florida bonneted	Vertebrate	Mammal	FWS Region 4: Southeast	FL	Yes	https://www.govinfo.gov/content/pkg/FR-2022-11-22/pdf/2022-25218.pdf#page=1	Described as a threat in several units.	2022	Yes	https://www.govinfo.gov/content/pkg/FR-2022-11-22/pdf/2022-25218.pdf#page=1	Habitat connectivity may be needed for movements in response to climate change. Also specifically recommends designating at least one unit in the northen part fof the species range.	2022
164	Euphilotes battoides allyni	Butterfly, El Segundo blue	Invertebrate	Arthropod	FWS Region 8: Pacific Southwest	CA	No	https://ecos.fws.gov/docs/tess/species_nonpublish/3501.pdf		2021	No	https://ecos.fws.gov/docs/tess/species_nonpublish/3501.pdf		2021
165	Euphilotes enoptes smithi	Butterfly, Smith's blue	Invertebrate	Arthropod	FWS Region 8: Pacific Southwest	CA	Yes	https://ecos.fws.gov/docs/five_year_review/doc6600.pdf	"Factors related to climate change, especially sea level rise and increasing temperatures and drought [are] threats"	2020	No	https://ecos.fws.gov/docs/five_year_review/doc6600.pdf		2020
166	Euphydryas editha quino	Butterfly, Quino checkerspot	Invertebrate	Arthropod	FWS Region 8: Pacific Southwest	CA	Yes	https://ecos.fws.gov/docs/recovery_plan/Draft%20RP%20Amendment%20for%20QCB_1.pdf		2019	Yes	https://ecos.fws.gov/docs/recovery_plan/Draft%20RP%20Amendment%20for%20QCB_1.pdf		2019
167	Euphydryas editha taylori	Checkerspot, Taylor's	Invertebrate	Arthropod	FWS Region 1: Pacific	OR, WA	Yes	https://ecos.fws.gov/docs/recovery_plan/SIGNED%20-%20TCB%20dRP%20(20221109).pdf	Brief mention: "Climate change is likely to indirectly affect Taylor’s checkerspot butterfly by altering biotic and abiotic factors resulting in declines in suitable habitat and altering the food plant phenology. "	2022	Yes	https://ecos.fws.gov/docs/recovery_plan/SIGNED%20-%20TCB%20dRP%20(20221109).pdf	"To ensure redundancy and representation across the species’ range, we delineated three recovery regions that encompass the genetic and ecological diversity of the species as well as currently unoccupied habitats that we consider less susceptible to perturbations associated with climate change but would provide the opportunity for future reintroductions."	2022
448	Eurycea (fmr. Typhlomolge) rathbuni	Salamander, Texas blind	Vertebrate	Amphibian	FWS Region 2: Southwest	TX	Yes	https://ecos.fws.gov/docs/tess/species_nonpublish/954.pdf	"The flow models for San Marcos springs do not consider climate change, such as droughts that could surpass the drought of record."	2021	Yes	https://ecos.fws.gov/docs/tess/species_nonpublish/954.pdf	"We recommend revising the Recovery Plan to incorporate new information, including future climate modeling..."	2021	=Eurycea rathbuni
168	Eurycea sosorum	Salamander, Barton Springs	Vertebrate	Amphibian	FWS Region 2: Southwest	TX	Yes	https://ecos.fws.gov/docs/five_year_review/doc6177.pdf		2019	No	https://ecos.fws.gov/docs/five_year_review/doc6177.pdf		2019
169	Eurycea waterlooensis	Salamander, Austin blind	Vertebrate	Amphibian	FWS Region 2: Southwest	TX	Yes	https://ecos.fws.gov/docs/five_year_review/doc6171.pdf		2019	No	https://ecos.fws.gov/docs/five_year_review/doc6171.pdf		2019
170	Falco femoralis septentrionalis	Falcon, northern aplomado	Vertebrate	Bird	FWS Region 2: Southwest	AZ, NM, TX	Yes	http://ecos.fws.gov/docs/five_year_review/doc4436.pdf	Climate change is discussed at length in the Five-year Review (2014), with recommendations to update the recovery plan and establish additional populations.	2014	Yes	http://ecos.fws.gov/docs/five_year_review/doc4436.pdf	Climate change is discussed at length in the Five-year Review (2014), with recommendations to update the recovery plan and establish additional populations.	2014
171	Fulica americana alai	Coot, Hawaiian	Vertebrate	Bird	FWS Region 1: Pacific	HI	Yes	https://ecos.fws.gov/docs/tess/species_nonpublish/3491.pdf	"Climate change is believed to pose a threat"	2021	No	https://ecos.fws.gov/docs/tess/species_nonpublish/3491.pdf		2021
460 (2019 Listing)	Fundulus julisia	Barrens topminnow	Vertebrate	Fish	FWS Region 4: Southeast	TN	Yes	https://ecos.fws.gov/docs/recovery_plan/20191119%20final%20BTM%20recov%20outline.pdf		2019	Yes	https://ecos.fws.gov/docs/recovery_plan/20191119%20final%20BTM%20recov%20outline.pdf		2019
172	Fusconaia cor	Pigtoe, shiny	Invertebrate	Mollusk	FWS Region 4: Southeast	AL, TN, VA	Yes	https://ecos.fws.gov/docs/tess/species_nonpublish/3471.pdf	"The effects of climate change are unknown for the shiny pigtoe, its habitats, and its host fishes."	2021	No	https://ecos.fws.gov/docs/tess/species_nonpublish/3471.pdf		2021
173	Fusconaia cuneolus	Pigtoe, finerayed	Invertebrate	Mollusk	FWS Region 4: Southeast	AL, TN, VA	Yes	https://ecos.fws.gov/docs/tess/species_nonpublish/3629.pdf	"The effects of climate change are unknown for the finerayed pigtoe, its habitats, and its host fishes."	2021	No	https://ecos.fws.gov/docs/tess/species_nonpublish/3629.pdf		2021
175	Gallicolumba stairi	Friendly Ground-Dove	Vertebrate	Bird	FWS Region 1: Pacific	AS	Yes	https://ecos.fws.gov/docs/recovery_plan/Recovery_Plan_5_American_Samoa_Species_20220419.pdf	Increased severity of cyclones	2021	Yes	https://ecos.fws.gov/docs/recovery_plan/Recovery_Plan_5_American_Samoa_Species_20220419.pdf	Use climate info to determine areas for additional populations.	2021	2021 Five-year review was also yes/yes
176	Gallinula chloropus guami	Moorhen, Mariana common	Vertebrate	Bird	FWS Region 1: Pacific	GU, NMI	Yes	https://ecos.fws.gov/docs/recovery_plan/Mariana_Common_Moorhen_Final_Recovery_Plan_Amendment_20190820.pdf		2019	Yes	https://ecos.fws.gov/docs/recovery_plan/Mariana_Common_Moorhen_Final_Recovery_Plan_Amendment_20190820.pdf		2019	There was also a 2020 five-year review that was a Y/N https://ecos.fws.gov/docs/five_year_review/doc6572.pdf
177	Gallinula chloropus sandvicensis	Moorhen, Hawaiian common	Vertebrate	Bird	FWS Region 1: Pacific	HI	Yes	https://ecos.fws.gov/docs/tess/species_nonpublish/3476.pdf	"Climate change is believed to pose a threat to this species."	2021	No	https://ecos.fws.gov/docs/tess/species_nonpublish/3476.pdf		2021
178	Gambelia silus	Lizard, blunt-nosed leopard	Vertebrate	Reptile	FWS Region 8: Pacific Southwest	CA	Yes	https://ecos.fws.gov/docs/five_year_review/doc6447.pdf	Climate change listed as a threat	2020	No	https://ecos.fws.gov/docs/five_year_review/doc6447.pdf		2020
179	Gambusia gaigei	Gambusia, Big Bend	Vertebrate	Fish	FWS Region 2: Southwest	TX	Yes	http://ecos.fws.gov/docs/five_year_review/doc4106.pdf	Five-year review discusses potential climate impacts to species' hydrology and water temperatures: recommends a vulnerability analysis and update of recovery plan.	2012	Yes	http://ecos.fws.gov/docs/five_year_review/doc4106.pdf	Five-year review discusses potential climate impacts to species' hydrology and water temperatures: recommends a vulnerability analysis and update of recovery plan.	2012
180	Gambusia heterochir	Gambusia, Clear Creek	Vertebrate	Fish	FWS Region 2: Southwest	TX	Yes	https://ecos.fws.gov/docs/five_year_review/doc3232.pdf	Five-year review discusses potential climate impacts to hydrology and indirect impacts: recommends a vulnerability analysis and update of recovery plan.	2010	Yes	https://ecos.fws.gov/docs/five_year_review/doc3232.pdf	Five-year review discusses potential climate impacts to hydrology and indirect impacts: recommends a vulnerability analysis and update of recovery plan.	2010
181	Gambusia nobilis	Gambusia, Pecos	Vertebrate	Fish	FWS Region 2: Southwest	NM, TX	Yes	https://ecos.fws.gov/docs/tess/species_nonpublish/2563.pdf	Five-year review has a lengthy discussion on the effects of climate change on water availability.	2018	Yes	https://ecos.fws.gov/docs/tess/species_nonpublish/2563.pdf	Conduct a vulnerabililty assessment and update recovery plan.	2018
182	Gammarus acherondytes	Amphipod, Illinois cave	Invertebrate	Arthropod	FWS Region 3: Midwest	IL	Yes	http://ecos.fws.gov/docs/five_year_review/doc3881.pdf	Five-year review (2011): Brief mention of potential threat to hydrology; no detail or actions.	2011	No	https://ecos.fws.gov/docs/five_year_review/doc6383.pdf		2020
183	Gammarus desperatus	Amphipod, Noel's	Invertebrate	Arthropod	FWS Region 2: Southwest	NM	Yes	https://ecos.fws.gov/docs/recovery_plan/Final%20Recovery%20Plan%20Four%20Invertebrates%20of%20Pecos%20River%20Valley_1.pdf		2019	Yes	https://ecos.fws.gov/docs/recovery_plan/Final%20Recovery%20Plan%20Four%20Invertebrates%20of%20Pecos%20River%20Valley_1.pdf		2019	There was also a 2020 Five-year review that was a Y/N https://ecos.fws.gov/docs/five_year_review/doc6398.pdf
184	Gammarus hyalleloides	Amphipod, diminuitive	Invertebrate	Arthropod	FWS Region 2: Southwest	TX	Yes	http://www.gpo.gov/fdsys/pkg/FR-2013-07-09/pdf/2013-16222.pdf	Discussed as a factor in listing (particularly due to hydrologic impacts)	2013	No	http://www.gpo.gov/fdsys/pkg/FR-2013-07-09/pdf/2013-16230.pdf	not mentioned in critical habitat designation; no other recovery documents available.	2013
185	Gammarus pecos	Amphipod, Pecos	Invertebrate	Arthropod	FWS Region 2: Southwest	TX	Yes	https://ecos.fws.gov/docs/five_year_review/doc6201.pdf		2019	No	https://ecos.fws.gov/docs/five_year_review/doc6201.pdf		2019
186	Gasterosteus aculeatus williamsoni	Stickleback, unarmored threespine	Vertebrate	Fish	FWS Region 8: Pacific Southwest	CA	Yes	https://ecos.fws.gov/docs/tess/species_nonpublish/944.pdf	"climate-related threats [include] severe drought and flooding, and large-scale wildfire."	2021	No	https://ecos.fws.gov/docs/tess/species_nonpublish/944.pdf		2021
187	Gila bicolor mohavensis	Chub, Mohave tui	Vertebrate	Fish	FWS Region 8: Pacific Southwest	CA	Yes	https://ecos.fws.gov/docs/five_year_review/doc6585.pdf	Climate change listed as a threat	2020	No	https://ecos.fws.gov/docs/five_year_review/doc6585.pdf		2020
188	Gila bicolor snyderi	Chub, Owens tui	Vertebrate	Fish	FWS Region 8: Pacific Southwest	CA	Yes	https://ecos.fws.gov/docs/tess/species_nonpublish/3963.pdf	"Increasing temperatures and more extreme weather patterns associated with climate change are likely to affect Owens tui chub"	2022	Yes	https://ecos.fws.gov/docs/tess/species_nonpublish/3963.pdf	Update the 1998 Recovery Plan to address climate change threats among others	2022
189 (Delisted)	Gila boraxobius	Chub, Borax Lake	Vertebrate	Fish	FWS Region 1: Pacific	OR						https://ecos.fws.gov/ecp/species/6209		2019	Delisted
190 (Downlisted	Gila cypha	Chub, humpback	Vertebrate	Fish	FWS Region 6: Mountain Prairie	AZ, CO, UT	Yes	https://www.govinfo.gov/content/pkg/FR-2020-01-22/pdf/2020-00512.pdf#page=1	Downlisting proposed rule describes possible impacts to river flows		Yes	https://www.govinfo.gov/content/pkg/FR-2021-10-18/pdf/2021-20964.pdf#page=1			Downlisting proposal July 2021; takes effect November 17, 2021
191	Gila elegans	Chub, bonytail	Vertebrate	Fish	FWS Region 6: Mountain Prairie	AZ, CO, NV, UT	No	https://ecos.fws.gov/docs/five_year_review/doc6061.pdf		2019	Yes	http://ecos.fws.gov/docs/five_year_review/doc4034.pdf	Five-year review (2012) doesn't have a narrative on climate change threats, but does recommend that it should be covered in the revised recovery plan	2012
192	Gila intermedia	Chub, Gila	Vertebrate	Fish	FWS Region 2: Southwest	AZ, NM	No	http://www.gpo.gov/fdsys/pkg/FR-2005-11-02/pdf/05-21498.pdf	Not mentioned in listing decision and critical habitat rule (2005); no other recovery documents available.	2005	No	http://www.gpo.gov/fdsys/pkg/FR-2005-11-02/pdf/05-21498.pdf	Not mentioned in listing decision and critical habitat rule (2005); no other recovery documents available.	2005	Fed reg says there is a draft recovery plan (https://www.fws.gov/southwest/es/Documents/%20R2ES/GilaChub_DraftRecoveryPlan_%20Final_October2014.pdf), but the link was bad
193	Gila purpurea	Chub, Yaqui	Vertebrate	Fish	FWS Region 2: Southwest	AZ	Yes	https://ecos.fws.gov/docs/recovery_plan/20190926_Final%20RP%20Amend_Yaqui%20chub.pdf		2019	No	https://ecos.fws.gov/docs/recovery_plan/20190926_Final%20RP%20Amend_Yaqui%20chub.pdf		2019
194	Gila robusta jordani	Chub, Pahranagat roundtail	Vertebrate	Fish	FWS Region 8: Pacific Southwest	NV	No	https://ecos.fws.gov/docs/tess/species_nonpublish/4010.pdf	Brief mention of "elevated water temperatures" but no climate change context.	2022	No	https://ecos.fws.gov/docs/tess/species_nonpublish/4010.pdf	No mention of climate change actions.	2022
195	Gila seminuda	Chub, Virgin River	Vertebrate	Fish	FWS Region 6: Mountain Prairie	AZ, NV, UT	Yes	https://ecos.fws.gov/docs/five_year_review/doc6414.pdf	"If the effects of climate change continue as projected in the Virgin River Basin, environmental stressors will likely become amplified, as will their effects on the native fish populations."	2019	No	https://ecos.fws.gov/docs/recovery_plan/Virgin%20River%20chub%20recovery%20criteria_20181206_FINAL.pdf	This document didn't mention climate c hange at all. 2019 five-year review mentioned the threat, but no actions.	2019
196 (Delisted, then proposed threatened	Glaucidium brasilianum cactorum	Pygmy-owl, cactus ferruginous	Vertebrate	Bird	FWS Region 2: Southwest	AZ									Delisted
197	Glaucomys sabrinus coloratus	Squirrel, Carolina northern flying	Vertebrate	Mammal	FWS Region 4: Southeast	NC, TN, VA	Yes	https://ecos.fws.gov/docs/tess/species_nonpublish/3681.pdf	"One of the biggest threats to the Carolina northern flying squirrel today is climate change and the synergistic effects of climate change and other stressors."	2022	No	https://ecos.fws.gov/docs/tess/species_nonpublish/3681.pdf		2022
198	Glaucopsyche lygdamus palosverdesensis	Butterfly, Palos Verdes blue	Invertebrate	Arthropod	FWS Region 8: Pacific Southwest	CA	Yes	https://ecos.fws.gov/docs/tess/species_nonpublish/3235.pdf	"Recent climate change modeling suggests that the tropical hardwood hammock in Key Largo is less vulnerable to SLR than other areas in the Florida Keys. Therefore, the threat of SLR towards Schaus’ is low at this time." BUT: "Hurricanes and tropical storms, depending on location, intensity and habitat conditions (time-since-disturbance), could result in Schaus’ population extirpations or overall …	2021	No	https://ecos.fws.gov/docs/tess/species_nonpublish/3235.pdf		2021
199	Grus americana	Crane, whooping	Vertebrate	Bird	FWS Region 2: Southwest	CO, KS, MT, NE, ND, OK, SD, TX	Yes	http://ecos.fws.gov/docs/five_year_review/doc3977.pdf	Five-year review (2012) mentions climate impacts such as drought, sea-level rise, and storm intensity. Considered lowering recovery potential due to climate change threats. No explicit actions recommended, however.	2012	No	http://ecos.fws.gov/docs/five_year_review/doc3977.pdf	Five-year review (2012) mentions climate impacts such as drought, sea-level rise, and storm intensity. Considered lowering recovery potential due to climate change threats. No explicit actions recommended, however.	2012
200	Grus canadensis pulla	Crane, Mississippi sandhill	Vertebrate	Bird	FWS Region 4: Southeast	MS	Yes	https://ecos.fws.gov/docs/five_year_review/doc6122.pdf		2019	No	https://ecos.fws.gov/docs/five_year_review/doc6122.pdf		2019
201	Gymnogyps californianus	Condor, California	Vertebrate	Bird	FWS Region 8: Pacific Southwest	AZ, CA, UT	No	https://ecos.fws.gov/docs/recovery_plan/Not%20practicable_Condor.pdf	Supplemental finding of Not Practicable	2019	Study	http://ecos.fws.gov/docs/five_year_review/doc4163.pdf	Five-year review (2013) does not consider climate change to be a major threat (cites PRBA vulnerability assessment ); nonetheless recommends more detailed study, including incorporating climate into behavioral models and contaminants studies.	2013
202	Gymnomyza samoensis	Mao (= maomao) (honeyeater)	Vertebrate	Bird	FWS Region 1: Pacific	AS	Yes	https://ecos.fws.gov/docs/recovery_plan/Recovery_Plan_5_American_Samoa_Species_20220419.pdf	Increased severity of cyclones	2021	Yes	https://ecos.fws.gov/docs/recovery_plan/Recovery_Plan_5_American_Samoa_Species_20220419.pdf	Use climate info to determine areas for additional populations.	2021	There is also a 2021 Five-year review that is also a yes/yes.
203	Haliotis cracherodii	Abalone, black	Invertebrate	Mollusk	NMFS: Marine	CA, OR	Yes	https://repository.library.noaa.gov/view/noaa/27415	Mentioned briefly in recovery plan.	2020	Yes	https://repository.library.noaa.gov/view/noaa/27415	Habitat "plan should include contingencies for the loss, addition, and migration of black abalone habitat in response to climate change impacts"	2020
204	Haliotis sorenseni	Abalone, White	Invertebrate	Mollusk	FWS Region 8: Pacific Southwest	CA	Yes	http://ecos.fws.gov/docs/recovery_plan/whiteabalone.pdf	Recovery plan (2009) discusses potential for warmer water to worsen disease outbreaks, but emphasizes uncertainty. Recovery actions recommend establishing and protecting areas of temperature and pH refuge.	2009	Yes	http://ecos.fws.gov/docs/recovery_plan/whiteabalone.pdf	Recovery plan (2009) discusses potential for warmer water to worsen disease outbreaks, but emphasizes uncertainty. Recovery actions recommend establishing and protecting areas of temperature and pH refuge.	2009
205 (Downlisted)	Helminthoglypta walkeriana	Snail, Morro shoulderband	Invertebrate	Mollusk	FWS Region 8: Pacific Southwest	CA		https://ecos.fws.gov/docs/recovery_plan/Morro%20Shoulderband%20clarification.pdf				https://ecos.fws.gov/docs/recovery_plan/Morro%20Shoulderband%20clarification.pdf			Downlisted feb 23, 2022 https://www.fws.gov/species/morro-shoulderband-helminthoglypta-walkeriana
206	Hemignathus wilsoni (fmr. munroi)	`Akiapola`au (honeycreeper)	Vertebrate	Bird	FWS Region 1: Pacific	HI	Yes	https://ecos.fws.gov/docs/five_year_review/doc6490.pdf	"If climate change were to reduce the remaining suitable habitat for ‘akiapōlā‘au as predicted, it would likely contribute to the extinction of this species over time."	2020	Yes	https://ecos.fws.gov/docs/five_year_review/doc4571.pdf	2015 Five-year review discusses the effect of climate change on malaria transmission. Recommends monitoring, research, and forest protection and restoration. 2020 Five-year review is very brief and only discusses monitoring of climate effects.	2015	Name has changed to H. wilsoni
207	Hemistena lata	Pearlymussel, cracking	Invertebrate	Mollusk	FWS Region 4: Southeast	AL, TN, VA	Yes	https://ecos.fws.gov/docs/five_year_review/doc6300.pdf		2019	No	https://ecos.fws.gov/docs/five_year_review/doc6300.pdf		2019
208	Heraclides aristodemus ponceanus	Butterfly, Schaus swallowtail	Invertebrate	Arthropod	FWS Region 4: Southeast	FL	Yes	https://ecos.fws.gov/docs/recovery_plan/Schaus_%20Sallowtail%20Butterfly%20Recovery%20Plan%20Amendment.pdf		2019	No	https://ecos.fws.gov/docs/recovery_plan/Schaus_%20Sallowtail%20Butterfly%20Recovery%20Plan%20Amendment.pdf		2019
210	Heterelmis comalensis	Beetle, Comal Springs riffle	Invertebrate	Arthropod	FWS Region 2: Southwest	TX	Yes	http://www.gpo.gov/fdsys/pkg/FR-2013-10-23/pdf/2013-24168.pdf	Climate change, particularly drought impacts, are a "special management consideration" in the revised critical habitat designation (2013).	2013	Yes	http://www.gpo.gov/fdsys/pkg/FR-2013-10-23/pdf/2013-24168.pdf	Climate change, particularly drought impacts, are a "special management consideration" in the revised critical habitat designation (2013).	2013
211	Himantopus mexicanus knudseni	Stilt, Hawaiian	Vertebrate	Bird	FWS Region 1: Pacific	HI	Yes	https://ecos.fws.gov/docs/five_year_review/doc6471.pdf	"Sea-level rise due to climate change adds a high uncertainty to the net gain or loss of foraging and breeding habitat, which can exacerbate the current threat of habitat loss and degradation."	2020	Yes	https://ecos.fws.gov/docs/five_year_review/doc6471.pdf	"Start prioritizing conservation actions that need to be taken in response to SLR for areas currently in the coastal plain"	2020	Proposed for downlisting on 3/25/2021/ not finalized
212	Hybognathus amarus	Minnow, Rio Grande silvery	Vertebrate	Fish	FWS Region 2: Southwest	NM, TX	Yes	https://ecos.fws.gov/docs/tess/species_nonpublish/3342.pdf	2018 Five-year review has several mentions of climate impacts, but no additional specific actions.	2018	Yes	http://ecos.fws.gov/docs/recovery_plan/022210_v2.pdf	Management actions include identifying ways to continue providing water to maintain habitat during periods of low flow.	2010
213	Hylaeus anthracinus	Anthricinan yellow-faced bee	Invertebrate	Arthropod	FWS Region 1: Pacific	HI	Yes	https://ecos.fws.gov/docs/recovery_plan/Hawaiian_Archipelago_Recovery_Plan_20221214.pdf	Checked in summary table as a "known threat to species, not itemized." "Climate change has the potential to adversely affect the four yellow-faced bee species (Table 6)."	2022	Yes	https://ecos.fws.gov/docs/recovery_plan/Hawaiian_Archipelago_Recovery_Plan_20221214.pdf	Fire management should account for drought and climate change. Expand species range.	2022	There is also a 2021 Five-year review that is also a yes/yes.
214	Hylaeus assimulans	Assimulans yellow-faced bee	Invertebrate	Arthropod	FWS Region 1: Pacific	HI	Yes	https://ecos.fws.gov/docs/recovery_plan/Hawaiian_Archipelago_Recovery_Plan_20221214.pdf	Checked in summary table as a "known threat to species, not itemized." "Climate change has the potential to adversely affect the four yellow-faced bee species (Table 6)."	2022	Yes	https://ecos.fws.gov/docs/recovery_plan/Hawaiian_Archipelago_Recovery_Plan_20221214.pdf	Fire management should account for drought and climate change. Expand species range.	2022	There is also a 2021 Five-year review that is also a yes/yes.
215	Hylaeus facilis	Easy yellow-faced bee	Invertebrate	Arthropod	FWS Region 1: Pacific	HI	Yes	https://ecos.fws.gov/docs/recovery_plan/Hawaiian_Archipelago_Recovery_Plan_20221214.pdf	Checked in summary table as a "known threat to species, not itemized." "Climate change has the potential to adversely affect the four yellow-faced bee species (Table 6)."	2022	Yes	https://ecos.fws.gov/docs/recovery_plan/Hawaiian_Archipelago_Recovery_Plan_20221214.pdf	Fire management should account for drought and climate change. Expand species range.	2022	There is also a 2021 Five-year review that is also a yes/yes.
216	Hylaeus hilaris	Hilaris yellow-faced bee	Invertebrate	Arthropod	FWS Region 1: Pacific	HI	Yes	https://ecos.fws.gov/docs/recovery_plan/Maui_Nui_Draft_RP_20211217_Signed.pdf	Discussed under both Factor A and Factor E.	2021	Yes	https://ecos.fws.gov/docs/recovery_plan/Maui_Nui_Draft_RP_20211217_Signed.pdf	Research needed, also translocation outside of historic range may be necessary to climate adaptation.	2021	There is also a 2021 Five-year review that is also a yes/yes.
217	Hylaeus kuakea	Hawaiian yellow-faced bee	Invertebrate	Arthropod	FWS Region 1: Pacific	HI	Yes	https://ecos.fws.gov/docs/tess/species_nonpublish/3300.pdf	Vulnerable to climate change effects like increasing temperatures, changing rainfall patterns, and changes in disturbance regimes (e.g., storms and hurricanes).	2021	No	https://ecos.fws.gov/docs/tess/species_nonpublish/3300.pdf		2021
218	Hylaeus longiceps	Hawaiian yellow-faced bee	Invertebrate	Arthropod	FWS Region 1: Pacific	HI	Yes	https://ecos.fws.gov/docs/recovery_plan/Maui_Nui_Draft_RP_20211217_Signed.pdf	Discussed under both Factor A and Factor E.	2021	Yes	https://ecos.fws.gov/docs/recovery_plan/Maui_Nui_Draft_RP_20211217_Signed.pdf	Research needed, also translocation outside of historic range may be necessary to climate adaptation.	2021	There is also a 2021 Five-year review that is also a yes/yes.
219	Hylaeus mana	Hawaiian yellow-faced bee	Invertebrate	Arthropod	FWS Region 1: Pacific	HI	Yes	https://ecos.fws.gov/docs/tess/species_nonpublish/3635.pdf	"Climate change is expected to affect lowland mesic ecosystems. Reduced genetic diversity of the remaining individuals may limit the ability of the yellow-faced bee to adapt."	2021	No	https://ecos.fws.gov/docs/tess/species_nonpublish/3635.pdf		2021
220	Hypolimnas octocula marianensis	Mariana eight-spot butterfly	Invertebrate	Arthropod	FWS Region 1: Pacific	GU	Yes	https://ecos.fws.gov/docs/recovery_plan/SIGNED%20-%20Mariana%20Islands%20dRP%20(20221129).pdf	Mentioned briefly as one of the threats.	2022	Yes	https://ecos.fws.gov/docs/recovery_plan/SIGNED%20-%20Mariana%20Islands%20dRP%20(20221129).pdf	"While having redundant and resilient populations distributed throughout a species’ range is a hallmark of most recovery criteria, the periodic and extremely destructive potential of typhoons, which will likely increase with climate change, indicates that conservation translocations will be particularly important to the recovery of 23 species." Also mentions modeling and adaptive management.	2022	There is also a 2021 Five-year review that is a yes/no.
336	Icaricia (fmr. Plebejus) shasta charlestonensis	Butterfly, Mt. Charleston blue	Invertebrate	Arthropod	FWS Region 8: Pacific Southwest	NV	Yes	https://ecos.fws.gov/docs/recovery_plan/MCBB Draft Recovery Plan.pdf	One mention as a threat	2021	Yes	http://www.gpo.gov/fdsys/pkg/FR-2015-06-30/pdf/2015-15947.pdf	2015 Critical Habitat designation includes management considerations to protect or minimize impacts to habitat.	2015	Plebejus in original data
221	Icaricia icarioides fenderi	Butterfly, Fender's blue	Invertebrate	Arthropod	FWS Region 1: Pacific	OR	Yes	https://ecos.fws.gov/docs/five_year_review/doc6175.pdf		2019	Yes	http://ecos.fws.gov/docs/recovery_plan/100629.pdf	2010 Recovery plan discusses changes to phenology, range shifts, disturbance changes, etc. Response includes monitoring, adaptive management, and protecting habitat at a range of elevations.	2010	Downlisting proposed in June 2021, not yet finalized
222	Icaricia icarioides missionensis	Butterfly, mission blue	Invertebrate	Arthropod	FWS Region 8: Pacific Southwest	CA	Yes	https://ecos.fws.gov/docs/tess/species_nonpublish/3690.pdf	Climate change listed as a threat (in 2010 status review)	2022	Yes	https://ecos.fws.gov/docs/recovery_plan/APG%20amendment%20MBB%20SBEB.pdf		2019
223	Ischnura luta	Rota blue damselfly	Invertebrate	Arthropod	FWS Region 1: Pacific	NMI	Yes	https://ecos.fws.gov/docs/recovery_plan/SIGNED%20-%20Mariana%20Islands%20dRP%20(20221129).pdf	Listed in Summary table as one of the most pressing threats to the species.	2022	Yes	https://ecos.fws.gov/docs/recovery_plan/SIGNED%20-%20Mariana%20Islands%20dRP%20(20221129).pdf	Manage watersheds to account for effects of drought on stream flow to prevent habitat loss.	2022	There was also a five-year review in 2020 that was a Y/N https://ecos.fws.gov/docs/five_year_review/doc6666.pdf
224	Juturnia kosteri	Springsnail, Koster's	Invertebrate	Mollusk	FWS Region 2: Southwest	NM, TX	Yes	https://ecos.fws.gov/docs/recovery_plan/Final%20Recovery%20Plan%20Four%20Invertebrates%20of%20Pecos%20River%20Valley_1.pdf		2019	Yes	https://ecos.fws.gov/docs/recovery_plan/Final%20Recovery%20Plan%20Four%20Invertebrates%20of%20Pecos%20River%20Valley_1.pdf		2019	There was also a five-year review in 2020 that was a Y/N https://ecos.fws.gov/docs/five_year_review/doc6398.pdf
225	Kinosternon sonoriense longifemorale	Sonoyta mud turtle	Vertebrate	Reptile	FWS Region 2: Southwest	AZ	Yes	https://www.govinfo.gov/content/pkg/FR-2020-06-23/pdf/2020-11741.pdf#page=1	Critical habitat designation mentions that commenters recommended designating additional habitat to account for climate change.	2020	No	https://www.govinfo.gov/content/pkg/FR-2020-06-23/pdf/2020-11741.pdf#page=1	FWS did not designate any additional areas in response to these comments.	2020
226	Lampsilis abrupta	Mucket, pink	Invertebrate	Mollusk	FWS Region 4: Southeast	AL, AR, IL, KY, LA, MO, OH, TN, VA, WV	Yes	https://ecos.fws.gov/docs/five_year_review/doc6065.pdf		2019	No	https://ecos.fws.gov/docs/five_year_review/doc6065.pdf		2019
227	Lampsilis higginsii	Pearlymussel, Higgins' eye	Invertebrate	Mollusk	FWS Region 3: Midwest	IL, IA, MN, MO, SD, WI	No	https://ecos.fws.gov/docs/five_year_review/doc6565.pdf		2020	No	https://ecos.fws.gov/docs/five_year_review/doc6565.pdf		2020
228	Lampsilis rafinesqueana	Mucket, Neosho	Invertebrate	Mollusk	FWS Region 4: Southeast	AR, KS, MO, OK	Yes	https://ecos.fws.gov/docs/five_year_review/doc6400.pdf	Recovery plan amendment did not mention climate change, but five-year review did.	2020	No	https://ecos.fws.gov/docs/recovery_plan/Neosho%20Mucket%20Recovery%20Plan.pdf	Neither the recovery plan nor the five-year review (both 2020) had any climate actions.	2019
229	Lampsilis streckeri	Pocketbook, speckled	Invertebrate	Mollusk	FWS Region 4: Southeast	AR	Yes	https://ecos.fws.gov/docs/tess/species_nonpublish/3542.pdf	Stream temperature increases, drought, and severe storms	2021	No	https://ecos.fws.gov/docs/tess/species_nonpublish/3542.pdf		2021
230	Lampsilis subangulata	Pocketbook, shinyrayed	Invertebrate	Mollusk	FWS Region 4: Southeast	AL, FL,GA	Yes	https://ecos.fws.gov/docs/five_year_review/doc6648.pdf	2019 Recovery plan amendment did not mention climate change	2020	No	https://ecos.fws.gov/docs/recovery_plan/Gulf%20Moccasinshell,%20Oval%20Pigtoe,%20Purple%20Bankclimber,%20Shinyrayed%20Pocketbook%20Recovery%20Plan%20Amendment.pdf	Neither the recovery plan nor the five-year review had any climate actions.	2019
231	Lampsilis virescens	Lampmussel, Alabama	Invertebrate	Mollusk	FWS Region 4: Southeast	AL	Yes	https://ecos.fws.gov/docs/five_year_review/doc6515.pdf	"Climate change has the potential to increase the vulnerability of the lampmussel to random catastrophic events, primarily through more intense or frequent droughts."	2020	No	https://ecos.fws.gov/docs/five_year_review/doc6515.pdf		2020
232	Lanius ludovicianus mearnsi	Shrike, San Clemente loggerhead	Vertebrate	Bird	FWS Region 8: Pacific Southwest	CA	Yes	https://ecos.fws.gov/docs/five_year_review/doc6418.pdf	Mentioned as possible threat (also mentioned in 2019 recovery plan amendment	2020	Study	https://ecos.fws.gov/docs/five_year_review/doc6418.pdf	No climate actions in 2019 Recovery Plan amendment. https://ecos.fws.gov/docs/recovery_plan/SCI%20APG%20Amendment.pdf	2020
233	Lanx sp.	Limpet, Banbury Springs	Invertebrate	Mollusk	FWS Region 1: Pacific	ID	Yes	https://ecos.fws.gov/docs/tess/species_nonpublish/2595.pdf	Lengthy discussion of possible climate impacts to spring flow, but concludes: "In short, there are too many unknowns at this point to confidently determine if future projected climate change effects are a factor affecting the habitats and range of the Banbury Springs limpet."	2018	Yes	https://ecos.fws.gov/docs/tess/species_nonpublish/2595.pdf	Revise recovery plan to account for new threats.	2018	Recommends taxonomic update to: Idaholanx fresti
234	Lasiurus cinereus semotus	Bat, Hawaiian hoary	Vertebrate	Mammal	FWS Region 1: Pacific	HI	Yes	https://ecos.fws.gov/docs/tess/species_nonpublish/3306.pdf	May allow expansion of non-native coqui frogs, which compete with the species for food	2021	Study	https://ecos.fws.gov/docs/tess/species_nonpublish/3306.pdf	"Assess the impacts of climate change on ʻōpeʻapeʻa diet availability and thermal requirements necessary for biological success."	2021
235	Lasmigona decorata	Heelsplitter, Carolina	Invertebrate	Mollusk	FWS Region 4: Southeast	NC, SC	Yes	https://ecos.fws.gov/docs/five_year_review/doc6017.pdf		2019	No	https://ecos.fws.gov/docs/five_year_review/doc6017.pdf		2019
80	Lemiox rimosus (fmr. Conradilla caelata)	Pearlymussel, birdwing	Invertebrate	Mollusk	FWS Region 4: Southeast	AL, TN, VA	No	https://ecos.fws.gov/docs/five_year_review/doc6386.pdf		2020	No	https://ecos.fws.gov/docs/five_year_review/doc6386.pdf		2020	Name has changed to Lemiox rimosus
236	Leopardus pardalis	Ocelot	Vertebrate	Mammal	FWS Region 2: Southwest	AZ, TX	Yes	https://ecos.fws.gov/docs/recovery_plan/Ocelot%20Final%20Recovery%20Plan_Signed_July%202016_new%20(1).pdf	Recovery plan (2016) discusses drought, sea level rise, and heat extremes as climate change related threats	2016	Yes	https://ecos.fws.gov/docs/recovery_plan/Ocelot%20Final%20Recovery%20Plan_Signed_July%202016_new%20(1).pdf	Providing fresh water is the main action related to climate change, along with studying, modeling, developing plans.	2016	2018 Five-year review does not mention climate change)
237	Lepidochelys kempii	Sea turtle, Kemp's ridley	Vertebrate	Reptile	FWS Region 2: Southwest	AL, CT, DE, FL, GA, LA, MD, MA, MS, NJ, NY, NC, RI, SC, TX, VA	Yes	https://ecos.fws.gov/docs/tess/species_nonpublish/2303.pdf	2011 discusses potential for altered sex ratios and habitat loss from SLR, recommends assessment and modeling of impacts. 2015 review also discusses climate change at length.	2015	Yes	https://ecos.fws.gov/docs/tess/species_nonpublish/2303.pdf	2015 Five-year review recommends upgrading recovery priority to a 1 due in part to SLR and climate change.	2015
238	Lepidochelys olivacea	Sea turtle, olive ridley	Vertebrate	Reptile	FWS Region 4: Southeast	CA, HI, OR	No	https://ecos.fws.gov/docs/tess/species_nonpublish/3654.pdf	2014 Five-year review discusses climate impacts on nests and sex ratios (foraging impacts less a concern).	2014	No	https://ecos.fws.gov/docs/tess/species_nonpublish/3654.pdf	No climate related actions.	2014
239	Lepidomeda albivallis	Spinedace, White River	Vertebrate	Fish	FWS Region 8: Pacific Southwest	NV	Yes	http://ecos.fws.gov/docs/five_year_review/doc3213.pdf	Five-year review discusses potential for changes to hydrology and incidence of severe fires. No climate-specific actions recommended, however.	2010	No	https://ecos.fws.gov/docs/tess/species_nonpublish/3316.pdf		2021	2021 doc does not mention climate change
240	Lepidurus packardi	Tadpole shrimp, vernal pool	Invertebrate	Arthropod	FWS Region 8: Pacific Southwest	CA	Yes	http://ecos.fws.gov/docs/five_year_review/doc1160.pdf	Five-year review (2007) discusses potential for increase drought to degrade and destroy vernal pool habitats. No climate-specific actions or recommendations.	2007	No	http://ecos.fws.gov/docs/five_year_review/doc1160.pdf	Five-year review (2007) discusses potential for increase drought to degrade and destroy vernal pool habitats. No climate-specific actions or recommendations.	2007
241	Leptodea leptodon	Mussel, scaleshell	Invertebrate	Mollusk	FWS Region 3: Midwest	AR, IL, MO, NE, OK, SD	Yes	https://ecos.fws.gov/docs/tess/species_nonpublish/3246.pdf	"warmer air temperatures, more intense precipitation events, and increased summer drying"	2021	No	https://ecos.fws.gov/docs/tess/species_nonpublish/3246.pdf		2021
243	Leptonycteris nivalis	Bat, Mexican long-nosed	Vertebrate	Mammal	FWS Region 2: Southwest	NM, TX	Yes	https://ecos.fws.gov/docs/recovery_plan/Final%20RP%20Amendment_MX%20long-nosed%20bat_508%20Compliant.pdf		2019	Yes	https://ecos.fws.gov/docs/recovery_plan/Final%20RP%20Amendment_MX%20long-nosed%20bat_508%20Compliant.pdf		2019
244	Leptoxis foremani	Rocksnail, interrupted	Invertebrate	Mollusk	FWS Region 4: Southeast	AL, GA	Yes	https://ecos.fws.gov/docs/five_year_review/doc6377.pdf	Several climate change-related threats listed. 2019 Recovery plan amendment does not mention climate threat.	2020	No	https://ecos.fws.gov/docs/recovery_plan/Interrupted%20Rocksnail%20Recovery%20Plan%20Amendment_1.pdf	No actions in either 2019 recovery plan amendment or 2020 five-year review.	2019
245	Leptoxis plicata	Rocksnail, plicate	Invertebrate	Mollusk	FWS Region 4: Southeast	AL	Yes	https://ecos.fws.gov/docs/tess/species_nonpublish/4028.pdf	"Increasing temperatures will increase the rate of soil moisture loss, and areas that contain soil with poor water-holding capacity could experience an increase in drought conditions (Runkle et al. 2022)."	2022	No	https://ecos.fws.gov/docs/tess/species_nonpublish/4028.pdf		2022
246	Lepyrium showalteri	Pebblesnail, flat	Invertebrate	Mollusk	FWS Region 4: Southeast	AL	Yes	https://ecos.fws.gov/docs/tess/species_nonpublish/4028.pdf	"Increasing temperatures will increase the rate of soil moisture loss, and areas that contain soil with poor water-holding capacity could experience an increase in drought conditions (Runkle et al. 2022)."	2022	No	https://ecos.fws.gov/docs/tess/species_nonpublish/4028.pdf		2022
247	Lioplax cyclostomaformis	Lioplax, cylindrical	Invertebrate	Mollusk	FWS Region 4: Southeast	AL, GA	Yes	https://ecos.fws.gov/docs/tess/species_nonpublish/4028.pdf	"Increasing temperatures will increase the rate of soil moisture loss, and areas that contain soil with poor water-holding capacity could experience an increase in drought conditions (Runkle et al. 2022)."	2022	No	https://ecos.fws.gov/docs/tess/species_nonpublish/4028.pdf		2022
248	Lirceus usdagalun	Isopod, Lee County cave	Invertebrate	Arthropod	FWS Region 5: Northeast	VA	No	https://ecos.fws.gov/docs/tess/species_nonpublish/3356.pdf		2021	No	https://ecos.fws.gov/docs/tess/species_nonpublish/3356.pdf		2021
249	Loxioides bailleui	Palila	Vertebrate	Bird	FWS Region 1: Pacific	HI	Yes	https://ecos.fws.gov/docs/five_year_review/doc6528.pdf	"According to some climate change projections, temperature increases could present an additional threat specific to Hawaiian forest birds by causing an increase in the elevation below which regular transmission of avian malaria occurs, potentially reducing the remaining suitable habitat for these species."	2020	Study	https://ecos.fws.gov/docs/five_year_review/doc6528.pdf	"Continue population surveys and monitoring to determine palila response to management actions and the effects of climate change."	2020
250	Loxops caeruleirostris	Akekee	Vertebrate	Bird	FWS Region 1: Pacific	HI	Yes	https://ecos.fws.gov/docs/tess/species_nonpublish/3822.pdf	Listed as a threat	2022	Yes	https://ecos.fws.gov/docs/recovery_plan/Final_KIRP_ThreatsRecovery.pdf	Climate change vulnerability assessment is a statewide recovery action, all species, as is development of climate change adaptation strategies.	2021
251	Loxops coccineus coccineus	Akepa, Hawaii (honeycreeper)	Vertebrate	Bird	FWS Region 1: Pacific	HI	Yes	https://ecos.fws.gov/docs/five_year_review/doc6491.pdf	"If climate change were to reduce the remaining suitable habitat for Hawai‘i ‘ākepa as predicted, it would likely contribute to the extinction of this species over time."	2020	Yes	http://ecos.fws.gov/docs/five_year_review/doc4574.pdf	2015 Five-year review discusses the effect of climate change on malaria transmission. Recommends monitoring, research, and forest protection and restoration.	2015
252	Lycaeides argyrognomon lotis	Butterfly, lotis blue	Invertebrate	Arthropod	FWS Region 8: Pacific Southwest	CA	Yes	https://ecos.fws.gov/docs/recovery_plan/Supplemental%20Finding_Lotis%20Blue%20Butterfly_s20191210.pdf	However, the 2020 five-year review did not mention climate change.	2019	No	https://ecos.fws.gov/docs/five_year_review/doc6507.pdf		2020
253	Lycaeides melissa samuelis	Butterfly, Karner blue	Invertebrate	Arthropod	FWS Region 3: Midwest	IL, IN, MI, MN, NH, NY, OH, WI	Yes	https://ecos.fws.gov/docs/tess/species_nonpublish/2929.pdf	Fairly detailed discussion, including documentation of populatin extirpations associated with warming conditions. "the species’ vulnerability to the direct and indirect effects of climate change to it and its host plant, wild lupine, is high."	2019	Yes	https://ecos.fws.gov/docs/tess/species_nonpublish/2929.pdf	Several recovery actions are explicitly linked to climate change threat: planting lupine at the north end of the range, preserving genetic material, augmenting populations, etc.	2019
468 (2022)	Macrhybopsis tetranema	Chub, peppered	Vertebrate	Fish	FWS Region 2: Southwest	KS, NM, OK, TX	Yes	https://ecos.fws.gov/docs/recovery_plan/Peppered Chub Recovery Outline.pdf	One mention of climate as a stressor.	2022	Study	https://ecos.fws.gov/docs/recovery_plan/Peppered Chub Recovery Outline.pdf	Climate change effect on stream flow is an information gap.	2022
254	Manduca blackburni	Moth, Blackburn's sphinx	Invertebrate	Arthropod	FWS Region 1: Pacific	HI	Yes	https://ecos.fws.gov/docs/five_year_review/doc6101.pdf		2019	Yes	https://ecos.fws.gov/docs/five_year_review/doc6101.pdf		2019
255	Margaritifera marrianae	Pearlshell, Alabama	Invertebrate	Mollusk	FWS Region 4: Southeast	AL	Yes	http://www.gpo.gov/fdsys/pkg/FR-2012-10-10/pdf/2012-24161.pdf	Listing decision (2012): Climate change is discussed under Factor E and within the general discussion of designation of unoccupied critical habitat; partially occupied stretches are designated as critical habitat.	2012	Yes	http://www.gpo.gov/fdsys/pkg/FR-2012-10-10/pdf/2012-24161.pdf	Partially occupied stretches are designated as critical habitat. Note that recovery outline from same year does not mention climate change.	2012	https://ecos.fws.gov/docs/recovery_plan/20121113_Recovery%20Outline%20for%208%20Gulf%20Coast%20Mussels_FINAL.pdf
256	Meda fulgida	Spikedace	Vertebrate	Fish	FWS Region 2: Southwest	AZ, NM	Yes	https://ecos.fws.gov/docs/recovery_plan/Final%20RP%20Amendment_spikedace_508%20Compliant.pdf	Mentioned briefly as one of the threats in recovery plan amendment	2019	Yes	https://ecos.fws.gov/docs/recovery_plan/Final%20RP%20Amendment_spikedace_508%20Compliant.pdf	Recovery plan amendment mentions redundancy for climate resilience, no details however.	2019
257	Medionidus parvulus	Moccasinshell, Coosa	Invertebrate	Mollusk	FWS Region 4: Southeast	AL, GA, TN	Yes	https://ecos.fws.gov/docs/five_year_review/doc6224.pdf	No mention of climate change in 2019 recovery plan amendment, however	2019	No	https://ecos.fws.gov/docs/recovery_plan/Coosa%20moccasinshell%20and%20Southern%20pigtoe%20Recovery%20Plan%20Amendment_2.pdf	No actions in either 2019 recovery plan amendment or five-year review.	2019
258	Medionidus penicillatus	Moccasinshell, Gulf	Invertebrate	Mollusk	FWS Region 4: Southeast	AL, FL, GA	Yes	https://ecos.fws.gov/docs/five_year_review/doc6648.pdf	"Increasing temperatures and the associated increase in frequency, intensity, and duration of extreme heat events will lead to more droughts" (No discussion in 2019 recovery plan amendment)	2020	No	https://ecos.fws.gov/docs/recovery_plan/Gulf%20Moccasinshell,%20Oval%20Pigtoe,%20Purple%20Bankclimber,%20Shinyrayed%20Pocketbook%20Recovery%20Plan%20Amendment.pdf	No actions in either th 2019 amendment or 2020 review	2019
259	Medionidus simpsonianus	Moccasinshell, Ochlockonee	Invertebrate	Mollusk	FWS Region 4: Southeast	FL, GA	Yes	https://ecos.fws.gov/docs/five_year_review/doc6567.pdf	"The problems of altered hydrologic and temperature regimes and degraded water quality are likely to worsen as climate change related impacts intensify." (No discussion in 2019 recovery plan amendment)	2020	No	https://ecos.fws.gov/docs/recovery_plan/Ochlockonee%20Moccasinshell%20Recovery%20Plan%20Amendment_1.pdf	No actions in either amendment or review.	2019
260	Megalagrion leptodemas	Damselfly, crimson Hawaiian	Invertebrate	Arthropod	FWS Region 1: Pacific	HI	Yes	https://ecos.fws.gov/docs/five_year_review/doc6088.pdf	Discussed briefly as a threat in 2019 five year review.	2019	Yes	http://www.gpo.gov/fdsys/pkg/FR-2012-09-18/pdf/2012-19561.pdf	Ecosystem-based critical habitat designation incorporates climate change threats. (2019 5-year review has a "management actions" table but the climate line only talks about the threat, no actions.)	2012
261	Megalagrion nesiotes	Damselfly, flying earwig Hawaiian	Invertebrate	Arthropod	FWS Region 1: Pacific	HI	Yes	https://ecos.fws.gov/docs/recovery_plan/Hawaiian_Archipelago_Recovery_Plan_20221214.pdf	Checked in summary table as a "known threat to species, not itemized."	2022	Yes	https://ecos.fws.gov/docs/recovery_plan/Hawaiian_Archipelago_Recovery_Plan_20221214.pdf	Fire management should account for drought and climate change. Include climate and SLR impacts to stream systems, consider translocation to new or unoccupied suitable habitats.	2022
262	Megalagrion nigrohamatum nigrolineatum	Damselfly, blackline Hawaiian	Invertebrate	Arthropod	FWS Region 1: Pacific	HI	Yes	https://ecos.fws.gov/docs/five_year_review/doc6087.pdf		2019	Yes	https://www.govinfo.gov/content/pkg/FR-2012-09-18/pdf/2012-19561.pdf	Ecosystem-based critical habitat designation incorporates climate change threats. (2019 5-year review has a "management actions" table but the climate line only talks about the threat, no actions.)	2012
263	Megalagrion oceanicum	Damselfly, oceanic Hawaiian	Invertebrate	Arthropod	FWS Region 1: Pacific	HI	Yes	https://ecos.fws.gov/docs/five_year_review/doc6089.pdf		2019	Yes	https://ecos.fws.gov/docs/five_year_review/doc6089.pdf		2012
264	Megalagrion pacificum	Damselfly, Pacific Hawaiian	Invertebrate	Arthropod	FWS Region 1: Pacific	HI	Yes	https://ecos.fws.gov/docs/recovery_plan/Hawaiian_Archipelago_Recovery_Plan_20221214.pdf	Checked in summary table as a "known threat to species, not itemized."	2022	Yes	https://ecos.fws.gov/docs/recovery_plan/Hawaiian_Archipelago_Recovery_Plan_20221214.pdf	Fire management should account for drought and climate change. Include climate and SLR impacts to stream systems, consider translocation to new or unoccupied suitable habitats.	2022
265	Megalagrion xanthomelas	Orangeblack Hawaiian damselfly	Invertebrate	Arthropod	FWS Region 1: Pacific	HI	Yes	https://ecos.fws.gov/docs/recovery_plan/Hawaiian_Archipelago_Recovery_Plan_20221214.pdf	Checked in summary table as a "known threat to species, not itemized."	2022	Yes	https://ecos.fws.gov/docs/recovery_plan/Hawaiian_Archipelago_Recovery_Plan_20221214.pdf	Fire management should account for drought and climate change. Include climate and SLR impacts to stream systems, consider translocation to new or unoccupied suitable habitats.	2022
266	Megapodius laperouse	Megapode, Micronesian	Vertebrate	Bird	FWS Region 1: Pacific	NMI	Yes	https://ecos.fws.gov/docs/five_year_review/doc6633.pdf	Climate change may pose a threat, especially via more frequent and stronger typhoons.	2020	Study	https://ecos.fws.gov/docs/five_year_review/doc6633.pdf		2016
267	Microhexura montivaga	Spider, spruce-fir moss	Invertebrate	Arthropod	FWS Region 4: Southeast	NC, TN, VA	Yes	https://ecos.fws.gov/docs/tess/species_nonpublish/3227.pdf	"Climate change may be the greatest threat to the continued existence of the spruce-fir moss spider. Spruce and fir trees need cool, moist conditions for survival, and there is the potential for extirpation from some areas or further range retraction for both species as temperatures increase and areas experience extreme drought and precipitation events."	2021	Study	https://ecos.fws.gov/docs/tess/species_nonpublish/3227.pdf	"if resources are available, explore the feasibility of modeling potential future habitat degradation resulting from climate change at the subpopulation or population level to help prioritize future restoration efforts."	2021
268	Microtus californicus scirpensis	Vole, Amargosa	Vertebrate	Mammal	FWS Region 8: Pacific Southwest	CA	Yes	https://ecos.fws.gov/docs/recovery_plan/AMVO%20APG.pdf		2019	Yes	https://ecos.fws.gov/docs/recovery_plan/AMVO%20APG.pdf	Adds climate action based on new threat in 2009 Five-year review.	2019
269	Microtus pennsylvanicus dukecampbelli	Vole, Florida salt marsh	Vertebrate	Mammal	FWS Region 4: Southeast	FL	Yes	https://ecos.fws.gov/docs/tess/species_nonpublish/3936.pdf	increasing drought	2022	Yes	https://ecos.fws.gov/docs/recovery_plan/Florida%20Salt%20Marsh%20Vole%20Recovery%20Plan%20Amendement_1.pdf		2019
270	Moapa coriacea	Dace, Moapa	Vertebrate	Fish	FWS Region 8: Pacific Southwest	NV	No	https://ecos.fws.gov/docs/recovery_plan/960516.pdf	Most recent recovery document is from 1996; no mention of climate change.	1996	No	https://ecos.fws.gov/docs/recovery_plan/960516.pdf	Most recent recovery document is from 1996; no mention of climate change.	1996
271	Monachus schauinslandi	Seal, Hawaiian monk	Vertebrate	Mammal	NMFS: Marine	HI	Yes	https://www.federalregister.gov/documents/2015/08/21/2015-20617/endangered-and-threatened-species-final-rulemaking-to-revise-critical-habitat-for-hawaiian-monk	Brief mention in the 2015 critical habitat designation. "Unfortunately, at this time, the scope of existing science does not allow us to predict the resultant impacts to Hawaiian monk seal critical habitat with any certainty."	2015	No	https://www.federalregister.gov/documents/2015/08/21/2015-20617/endangered-and-threatened-species-final-rulemaking-to-revise-critical-habitat-for-hawaiian-monk		2015
272	Mustela nigripes	Ferret, black-footed	Vertebrate	Mammal	FWS Region 6: Mountain Prairie	AZ, CO, KS, MT, NE, NM, ND, SD, UT, WY	Yes	https://ecos.fws.gov/docs/five_year_review/doc6326.pdf	"Climate change constitutes an imminent threat of moderate magnitude by increasing the frequency and severity of droughts, which reduces black-footed ferret habitat suitability."	2020	Study	http://ecos.fws.gov/docs/recovery_plan/20131108%20BFF%202nd%20Rev.%20Final%20Recovery%20Plan.pdf	Recovery plan (2013) has lengthy discussion of potential effects, but concludes that it is not a threat to recovery at the current time. Actions include research on interactions between climate change and plague,	2013
273	Myadestes palmeri	Thrush, small Kauai	Vertebrate	Bird	FWS Region 1: Pacific	HI	Yes	https://ecos.fws.gov/docs/recovery_plan/Final_KIRP_ThreatsRecovery.pdf	Climate change is a threat to most or all listed species in the plan.	2021	Yes	https://ecos.fws.gov/docs/recovery_plan/Final_KIRP_ThreatsRecovery.pdf	Climate change vulnerability assessment is a statewide recovery action, all species, as is development of climate change adaptation strategies.	2021
274	Myotis grisescens	Bat, gray	Vertebrate	Mammal	FWS Region 3: Midwest	AL, AR, FL, GA, IL, IN, KS, KY, MO, MS, NC, OK, TN, VA, WV	Yes	http://ecos.fws.gov/docs/five_year_review/doc2625.pdf	Five-year review (2009) mentions potential impacts to prey base and species' range, but no climate-related recommendations or actions.	2009	No	http://ecos.fws.gov/docs/five_year_review/doc2625.pdf	Five-year review (2009) mentions potential impacts to prey base and species' range, but no climate-related recommendations or actions.	2009
470 (2022)	Myotis septentrionalis	Bat, Northern Long-eared	Vertebrate	Mammal	FWS Region 3: Midwest	Alabama, Arkansas, Connecticut, Delaware, District of Columbia, Georgia, Illinois, Indiana, Iowa, Kansas, Kentucky, Louisiana, Maine, Maryland, Massachusetts, Michigan, Minnesota, Mississippi, Missouri, Montana, Nebraska, New Hampshire, New Jersey, New York, North Carolina, North Dakota, Ohio, Oklahoma, Pennsylvania, Rhode Island, South Carolina, South Dakota, Tennessee, Vermont, Virginia, West V…	Yes	https://www.govinfo.gov/content/pkg/FR-2022-11-30/pdf/2022-25998.pdf#page=1	"Although a changing climate may provide some benefit to the northern long-eared bat, overall negative impacts are anticipated, especially at local levels." (WNS is by far the main threat however.)	2022	N/A	https://www.govinfo.gov/content/pkg/FR-2022-11-30/pdf/2022-25998.pdf#page=1	No actions in a listing decision.	2022	This is an uplisting from T to E.
275	Myotis sodalis	Bat, Indiana	Vertebrate	Mammal	FWS Region 3: Midwest	AL, AR, CT, GA, IA, IL, IN, KY, MA, MD, MI, MO, MS, NC, NJ, NY, OH, OK, PA, SC, TN, VA, VT, WV	Yes	https://ecos.fws.gov/docs/five_year_review/doc6293.pdf		2019	Yes	https://ecos.fws.gov/docs/five_year_review/doc6293.pdf		2019
276	Necturus alabamensis	Black warrior (=Sipsey Fork) Waterdog	Vertebrate	Amphibian	FWS Region 4: Southeast	AL	Yes	https://www.gpo.gov/fdsys/pkg/FR-2018-01-03/pdf/2017-28386.pdf	Listing decision: Under factor E, Discusses the potential for climate-change induced drought, impacts on water quantity and quality.	2018	No	Critical habitat: https://www.gpo.gov/fdsys/pkg/FR-2018-01-03/pdf/2017-28386.pdf Recovery plan: https://ecos.fws.gov/docs/recovery_plan/final%20blackwarrior%20waterdog%20recovery%20outline.pdf	Critical habitat: No clear climate change considerations in critical habitat designation or 2018 recovery plan.	2018
278	Neonympha mitchellii francisci	Butterfly, Saint Francis' satyr	Invertebrate	Arthropod	FWS Region 4: Southeast	NC	Yes	https://ecos.fws.gov/docs/five_year_review/doc6413.pdf	Higher temperatures and decreasing water availability could be threats	2020	No	https://ecos.fws.gov/docs/five_year_review/doc6413.pdf		2020
279	Neonympha mitchellii mitchellii	Butterfly, Mitchell's satyr	Invertebrate	Arthropod	FWS Region 3: Midwest	AL, IN, MI, MS, OH, VA	Yes	https://ecos.fws.gov/docs/tess/species_nonpublish/3237.pdf	"Climate change and extreme weather events may be straining rare butterflies and their habitats, including Mitchell’s satyr… A climate change vulnerability assessment concluded that the Mitchell’s satyr is extremely vulnerable to climate change in Michigan (Hoving et al. 2013)."	2021	No	https://ecos.fws.gov/docs/tess/species_nonpublish/3237.pdf		2021
280	Neotoma floridana smalli	Woodrat, Key Largo	Vertebrate	Mammal	FWS Region 4: Southeast	FL	No	https://ecos.fws.gov/docs/recovery_plan/Key%20Largo%20Wood%20Rat%20Recovery%20Plan%20Amendment_1.pdf		2019	Yes	https://ecos.fws.gov/docs/recovery_plan/Key%20Largo%20Wood%20Rat%20Recovery%20Plan%20Amendment_1.pdf		2019
281	Neotoma fuscipes riparia	Woodrat, riparian	Vertebrate	Mammal	FWS Region 8: Pacific Southwest	CA	Yes	https://ecos.fws.gov/docs/five_year_review/doc6443.pdf		2012	No	https://ecos.fws.gov/docs/five_year_review/doc6443.pdf		2020
282	Newcombia cumingi	Snail, Newcomb's tree	Invertebrate	Mollusk	FWS Region 1: Pacific	HI	Yes	https://ecos.fws.gov/docs/recovery_plan/Maui_Nui_Draft_RP_20211217_Signed.pdf	Discussed under both Factor A and Factor E.	2021	Yes	https://ecos.fws.gov/docs/recovery_plan/Maui_Nui_Draft_RP_20211217_Signed.pdf	Research needed, also translocation outside of historic range may be necessary to climate adaptation.	2021
283 (Downlisted)	Nicrophorus americanus	Beetle, American burying	Invertebrate	Arthropod	FWS Region 2: Southwest	AR, KS, MA, MO, NE, OH, OK, RI, SD, TX	Yes	https://www.govinfo.gov/content/pkg/FR-2020-10-15/pdf/2020-19810.pdf#page=1	Downlisting rule talks about climate quite a bit, including which populations are most threatened		Yes	https://www.govinfo.gov/content/pkg/FR-2020-10-15/pdf/2020-19810.pdf#page=1	Climate change seems to be a factor in the 4(d) rule.		Downlisted to threatened in 2020
284	Notropis albizonatus	Shiner, palezone	Vertebrate	Fish	FWS Region 4: Southeast	AL, KY	Yes	http://ecos.fws.gov/docs/five_year_review/doc4374.pdf	2014 Five-year review briefly mentions climate threats (severe storms, drought). No climate-related recommendations or actions.	2014	No	https://ecos.fws.gov/docs/recovery_plan/Palezone%20Shiner%20Recovery%20Plan%20Amendment_1.pdf		2019	Neither the 2019 nor 2020 docs mentioned climate change at all.
285	Notropis buccula	Shiner, smalleye	Vertebrate	Fish	FWS Region 2: Southwest	TX	Yes	https://ecos.fws.gov/docs/recovery_plan/Final Recovery Plan_Brazos Shiners_rd signed.pdf	Climate change may exacerbate drought.	2022	Study	https://ecos.fws.gov/docs/recovery_plan/Final Recovery Plan_Brazos Shiners_rd signed.pdf	Model climate change impact on stream flow.	2022	There is also a 2022 recovery implementation strategy, but no additional detail there. (https://ecos.fws.gov/docs/recovery_plan/Recovery Implementation Strategy_Brazos Shiners.pdf)
286	Notropis cahabae	Shiner, Cahaba	Vertebrate	Fish	FWS Region 4: Southeast	AL	Yes	https://ecos.fws.gov/docs/tess/species_nonpublish/4014.pdf	One sentence: "Additionally, climate change posses a threat to this species. "	2022	No	https://ecos.fws.gov/docs/tess/species_nonpublish/4014.pdf		2022
287	Notropis mekistocholas	Shiner, Cape Fear	Vertebrate	Fish	FWS Region 4: Southeast	NC	Yes	https://ecos.fws.gov/docs/tess/species_nonpublish/3981.pdf	"Impacts to baseline and extreme flow events from climate change were cited as a Factor E concern in the previous 5-year review for the species (Service 2017). The recent SSA (Service 2022) used USEPA’s Integrated Climate and Land Use Scenarios projections to explore future changes in the range of the Cape Fear shiner. The analyses indicated climate change influences did not rise to a level of co…	2022	N/A (Not a threat)	https://ecos.fws.gov/docs/tess/species_nonpublish/3981.pdf		2022
288	Notropis oxyrhynchus	Shiner, sharpnose	Vertebrate	Fish	FWS Region 2: Southwest	TX	Yes	https://ecos.fws.gov/docs/recovery_plan/Final Recovery Plan_Brazos Shiners_rd signed.pdf	Climate change may exacerbate drought.	2022	Study	https://ecos.fws.gov/docs/recovery_plan/Final Recovery Plan_Brazos Shiners_rd signed.pdf	Model climate change impact on stream flow.	2022	There is also a 2022 recovery implementation strategy, but no additional detail there. (https://ecos.fws.gov/docs/recovery_plan/Recovery Implementation Strategy_Brazos Shiners.pdf)
289	Notropis topeka	Shiner, Topeka	Vertebrate	Fish	FWS Region 6: Mountain Prairie	IA, KS, MN, MO, NE, SD	Yes	https://ecos.fws.gov/docs/recovery_plan/20210325_Final_Recovery_Plan_for_Topeka_shiner_SIGNED.pdf	Climate change mentioned as a threat, references 2018 SSA.	2021	Yes	https://ecos.fws.gov/docs/recovery_plan/20210325_Final_Recovery_Plan_for_Topeka_shiner_SIGNED.pdf	Research on climate impacts and implement results via adaptive management	2021	There is also a 2021 Five-year review that is a yes/no.
290	Noturus baileyi	Madtom, smoky	Vertebrate	Fish	FWS Region 4: Southeast	TN	Yes	https://ecos.fws.gov/docs/five_year_review/doc6429.pdf	"Climate change has the potential to increase vulnerability of Smoky Madtom populations to random catastrophic events or alter habitat suitability within the species’ range."	2020	No	https://ecos.fws.gov/docs/five_year_review/doc6429.pdf		2020
291	Noturus crypticus	Madtom, chucky	Vertebrate	Fish	FWS Region 4: Southeast	TN	Yes	https://ecos.fws.gov/docs/five_year_review/doc6098.pdf		2019	No	https://ecos.fws.gov/docs/five_year_review/doc6098.pdf		2019
464 (2021 Listing)	Noturus furiosus	Carolina madtom	Vertebrate	Fish	FWS Region 4: Southeast	NC	Yes	https://www.govinfo.gov/content/pkg/FR-2021-06-09/pdf/2021-11600.pdf#page=1	Section on climate change in the listing decision.	2021	Yes	https://www.govinfo.gov/content/pkg/FR-2021-06-09/pdf/2021-11600.pdf#page=1	Critical habitat designation mentions that threats will be exacerbated by climate change.	2021	There is also a 2021 Recovery Outline, which mentions climate change once as a threat and has no actions.
292	Noturus stanauli	Madtom, pygmy	Vertebrate	Fish	FWS Region 4: Southeast	TN	No	https://ecos.fws.gov/docs/recovery_plan/Pygmy%20Madtom%20Recovery%20Plan%20Amendment_1.pdf		2019	No	https://ecos.fws.gov/docs/recovery_plan/Pygmy%20Madtom%20Recovery%20Plan%20Amendment_1.pdf		2019
293	Oarisma poweshiek	Skipperling, Poweshiek	Invertebrate	Arthropod	FWS Region 3: Midwest	IA, MI, MN, ND, SD, WI	Yes	https://ecos.fws.gov/docs/recovery_plan/20220310_POSK_Final Recovery_Plan_508.pdf	Drought and cliamte change mentioned briefly.	2022	Yes	https://ecos.fws.gov/docs/recovery_plan/20220310_POSK_Final Recovery_Plan_508.pdf	Climate resilience is a component to poulation health.	2022
451	Obobaria (fmr. Villosa) choctawensis	Bean, Choctaw	Invertebrate	Mollusk	FWS Region 4: Southeast	AL, FL	Yes	https://ecos.fws.gov/docs/tess/species_nonpublish/3970.pdf	changes to hydrology, increasing temperatures, and sea level rise	2022	Yes	https://ecos.fws.gov/docs/tess/species_nonpublish/3970.pdf	"Model future precipitation, temperature, and flow scenarios in the basins to examine the impacts of climate change and consumptive uses. Also model future sea level and flow scenarios to analyze the effects of saltwater encroachment in the lower mainstems during high tide and storm surge events. Use the assessments to develop SSAs and recovery plans for the species."	2022	Genus name has changed from Villosa to Obovaria
294	Obovaria retusa	Mussel, ring pink (=golf stick pearly)	Invertebrate	Mollusk	FWS Region 4: Southeast	AL, KY, TN	Yes	https://ecos.fws.gov/docs/five_year_review/doc6241.pdf		2019	No	https://ecos.fws.gov/docs/five_year_review/doc6241.pdf		2019
295	Oceanodroma (=Hydrobates) castro	Band-rumped storm-petrel	Vertebrate	Bird	FWS Region 1: Pacific	HI	Yes	https://ecos.fws.gov/docs/recovery_plan/Hawaiian_Archipelago_Recovery_Plan_20221214.pdf	"Stochastic events such as hurricanes, drought, and landslides have the potential to negatively affect band-rumped storm-petrel on their breeding grounds. The frequency and magnitude of these occurrences is related to climate change, and the size and intensity of large-scale storms are expected to increase in coming years."	2022	Yes	https://ecos.fws.gov/docs/recovery_plan/Hawaiian_Archipelago_Recovery_Plan_20221214.pdf	"Food-web changes associated with climate change, interactions with commercial fishing, and proposed offshore infrastructure will need to be studied and management tools developed to minimize these threats as needed."	2022	Species name change?: Hydrobates castro (Ecos still uses old name)
296	Odocoileus virginianus clavium	Deer, key	Vertebrate	Mammal	FWS Region 4: Southeast	FL	Yes	https://ecos.fws.gov/docs/recovery_plan/Key deer_recovery criteria amendment.pdf	Discusses SLR in some detail, as well as climate change impact on hurricanes	2022	Yes	https://ecos.fws.gov/docs/recovery_plan/Final_KIRP_ThreatsRecovery.pdf	Population 3Rs are explicitly connected to climate resilience.	2022
297	Oncorhynchus kisutch	Salmon, coho	Vertebrate	Fish	NMFS: Marine	CA, OR	Yes	https://media.fisheries.noaa.gov/2021-04/SIS%20Action%20Plan%202021_CCCCoho_FINAL%20508.pdf	Priority action plan for the E population says that pace of habitat restoration must increase due to climate threat.	2021	Yes	https://media.fisheries.noaa.gov/2021-04/SIS%20Action%20Plan%202021_CCCCoho_FINAL%20508.pdf	Priority action plan for the E population says that pace of habitat restoration must increase due to climate threat.	2021
298	Oncorhynchus mykiss	Steelhead	Vertebrate	Fish	NMFS: Marine	CA, OR, WA	Yes	https://www.fisheries.noaa.gov/resource/document/final-recovery-plan-south-central-california-steelhead	2013 Recovery plan has a chapter on climate change with detailed projection and effects, as well as recovery actions.	2013	Yes	https://www.fisheries.noaa.gov/resource/document/final-recovery-plan-south-central-california-steelhead	2013 Recovery plan has a chapter on climate change with detailed projection and effects, as well as recovery actions.	2013	So. Calif. DPS is the only E one (most are T); this seems to be the most recent document for this DPS.
299	Oncorhynchus nerka	Salmon, sockeye	Vertebrate	Fish	NMFS: Marine	OR, WA	Yes	https://repository.library.noaa.gov/view/noaa/45366	Extensive discussion in the 2022 5-year review.	2022	Yes	https://repository.library.noaa.gov/view/noaa/45366	Actions are somewhat general but include "formulating strategic plans to improve the species’ ability to adapt to the changing climate conditions as well as reduce projected effects of the warming climate on the freshwater environment"	2022
300	Oncorhynchus tshawytscha	Salmon, Chinook	Vertebrate	Fish	NMFS: Marine	OR, WA	Yes	https://repository.library.noaa.gov/view/noaa/45369	Extensive discussion in the 2022 5-year review.	2014	Yes	https://repository.library.noaa.gov/view/noaa/45369	"Prioritize tributary habitat projects that improve habitat resiliency to climate change."	2022
301	Orcinus orca	Whale, killer	Vertebrate	Mammal	NMFS: Marine	CA, OR, WA	Yes	https://www.fisheries.noaa.gov/resource/document/recovery-plan-southern-resident-killer-whales-orcinus-orca	2008 Recovery plan discusses potential impacts to ocean ecosystems and food webs	2008	Study	https://www.fisheries.noaa.gov/resource/document/recovery-plan-southern-resident-killer-whales-orcinus-orca	recommended actions are mainly research related.	2008	There is a 2021 5-year review whose only climate mention was a reference to a governor's task force report, which is not available, and a 2016 one that doesn't mention climate change at all.
302	Orconectes shoupi	Crayfish, Nashville	Invertebrate	Arthropod	FWS Region 4: Southeast	TN	No	https://www.govinfo.gov/content/pkg/FR-2020-09-23/pdf/2020-20158.pdf#page=1	Neither the delisting proposed rule nor the supporting SSA mention climate change.	2020	No	https://www.govinfo.gov/content/pkg/FR-2020-09-23/pdf/2020-20158.pdf#page=1	Neither the downlisting proposed rule nor the supporting SSA mention climate change.	2020	Proposed for delisting.
303	Oreomystis bairdi	`Akikiki	Vertebrate	Bird	FWS Region 1: Pacific	HI	Yes	https://ecos.fws.gov/docs/tess/species_nonpublish/3823.pdf	Listed as a threat	2022	Yes	https://ecos.fws.gov/docs/recovery_plan/Final_KIRP_ThreatsRecovery.pdf	Climate change vulnerability assessment is a statewide recovery action, all species, as is development of climate change adaptation strategies.	2021
304	Oreomystis mana	Creeper, Hawaii	Vertebrate	Bird	FWS Region 1: Pacific	HI	Yes	https://ecos.fws.gov/docs/five_year_review/doc6492.pdf	"According to some climate change projections, temperature increases could present an additional threat specific to Hawaiian forest birds by causing an increase in the elevation below which regular transmission of avian malaria occurs, potentially reducing the remaining suitable habitat for these species."	2020	Yes	https://ecos.fws.gov/docs/five_year_review/doc6492.pdf	"Continued monitoring of ‘alawī is important to determine species response to management actions and effects of climate change."	2015
305	Oryzomys palustris natator	Rice rat	Vertebrate	Mammal	FWS Region 4: Southeast	FL	Yes	https://ecos.fws.gov/docs/tess/species_nonpublish/3620.pdf	"Sea level rise associated with global climate change is a serious concern"	2021	Yes	https://ecos.fws.gov/docs/recovery_plan/Silver%20Rice%20Rat%20Recovery%20Plan%20Amendment_1.pdf		2019	2021 Five-year review was also was study
306	Ostodes strigatus	Snail [no common name]	Invertebrate	Mollusk	FWS Region 1: Pacific	AS	Yes	https://ecos.fws.gov/docs/recovery_plan/Recovery_Plan_5_American_Samoa_Species_20220419.pdf	Hurricanes. Discussed informationg gaps.	2021	Yes	https://ecos.fws.gov/docs/recovery_plan/Recovery_Plan_5_American_Samoa_Species_20220419.pdf	Use climate info to determine areas for additional populations.	2021	There is also a 2021 Five-year review that is also a yes/yes.
307	Ovis canadensis nelsoni	Sheep, Peninsular bighorn	Vertebrate	Mammal	FWS Region 8: Pacific Southwest	CA	Yes	http://ecos.fws.gov/docs/five_year_review/doc3637.pdf	2011 Five-year review discusses climate change, and particularly long-term drought, as a new threat not addressed in recovery plan. However, none of the recovery actions address climate change or drought.	2011	No	https://ecos.fws.gov/docs/tess/species_nonpublish/3496.pdf		2021	No climate mention in 2021 doc.
308	Ovis canadensis sierrae	Sheep, Sierra Nevada bighorn	Vertebrate	Mammal	FWS Region 8: Pacific Southwest	CA	No	https://ecos.fws.gov/docs/five_year_review/doc6240.pdf		2019	No	https://ecos.fws.gov/docs/five_year_review/doc6240.pdf		2019
309 (Delisted)	Oxyloma haydeni kanabensis	Ambersnail, Kanab	Invertebrate	Mollusk	FWS Region 2: Southwest	AZ									Delisted 6/24/2021 as "not a listable entity"
310	Pacifastacus fortis	Crayfish, Shasta	Invertebrate	Arthropod	FWS Region 8: Pacific Southwest	CA, OR	Yes	http://ecos.fws.gov/docs/five_year_review/doc2552.pdf	2009 Five-year review discusses climate change briefly, emphasizes uncertainty.	2009	No	http://ecos.fws.gov/docs/five_year_review/doc2552.pdf	No climate-related recommended actions	2009
311	Palaemonias alabamae	Shrimp, Alabama cave	Invertebrate	Arthropod	FWS Region 4: Southeast	AL	No	https://ecos.fws.gov/docs/recovery_plan/Alabama%20Cave%20Shrimp%20Recovery%20Plan%20Amendment.pdf		2019	No	https://ecos.fws.gov/docs/recovery_plan/Alabama%20Cave%20Shrimp%20Recovery%20Plan%20Amendment.pdf		2019
312	Palaemonias ganteri	Shrimp, Kentucky cave	Invertebrate	Arthropod	FWS Region 4: Southeast	KY	Yes	https://ecos.fws.gov/docs/tess/species_nonpublish/3698.pdf	" the species is likely vulnerable to the effects of climate change including changes in water temperature, dissolved oxygen, recharge rates, altered hydrological regime, groundwater levels, and groundwater quality"	2022	No	https://ecos.fws.gov/docs/tess/species_nonpublish/3698.pdf		2022
313	Palmeria dolei	Honeycreeper, crested	Vertebrate	Bird	FWS Region 1: Pacific	HI	Yes	https://ecos.fws.gov/docs/tess/species_nonpublish/2541.pdf	One mention as an "increasing" threat.	2018	Study	https://ecos.fws.gov/docs/tess/species_nonpublish/2541.pdf	"Research"	2018
314	Panthera onca	Jaguar	Vertebrate	Mammal	FWS Region 2: Southwest	AZ, NM	Yes	https://ecos.fws.gov/docs/recovery_plan/Final%20Jaguar%20Recovery%20Plan_July%202018.pdf	Climate change is referenced throughout the 2018 Final Recovery Plan, in sections on genetic diversity, corridor location, etc. Importance of more northerly recovery units and connectivity is emphasized in light of climate change. Studies on habitat and prey base effects and development of an adaptation plan recommended.	2018	Yes	https://ecos.fws.gov/docs/recovery_plan/Final%20Jaguar%20Recovery%20Plan_July%202018.pdf	Studies on habitat and prey base effects and development of an adaptation plan recommended.	2018
315	Partula gibba	Humped tree snail	Invertebrate	Mollusk	FWS Region 1: Pacific	GU	Yes	https://ecos.fws.gov/docs/recovery_plan/SIGNED%20-%20Mariana%20Islands%20dRP%20(20221129).pdf	Listed in Summary table as one of the most pressing threats to the species.	2022	Yes	https://ecos.fws.gov/docs/recovery_plan/SIGNED%20-%20Mariana%20Islands%20dRP%20(20221129).pdf	"While having redundant and resilient populations distributed throughout a species’ range is a hallmark of most recovery criteria, the periodic and extremely destructive potential of typhoons, which will likely increase with climate change, indicates that conservation translocations will be particularly important to the recovery of 23 species." Also mentions modeling and adaptive management.	2022	2020 Five-year review was a Yes/No https://ecos.fws.gov/docs/five_year_review/doc6494.pdf
316	Partula langfordi	Langford's tree snail	Invertebrate	Mollusk	FWS Region 1: Pacific	NMI	Yes	https://ecos.fws.gov/docs/recovery_plan/SIGNED%20-%20Mariana%20Islands%20dRP%20(20221129).pdf	Mentioned briefly as one of the threats.	2022	Yes	https://ecos.fws.gov/docs/recovery_plan/SIGNED%20-%20Mariana%20Islands%20dRP%20(20221129).pdf	"While having redundant and resilient populations distributed throughout a species’ range is a hallmark of most recovery criteria, the periodic and extremely destructive potential of typhoons, which will likely increase with climate change, indicates that conservation translocations will be particularly important to the recovery of 23 species." Also mentions modeling and adaptive management.	2022	2020 Five-year review was a Yes/No https://ecos.fws.gov/docs/five_year_review/doc6489.pdf
317	Partula radiolata	Guam tree snail	Invertebrate	Mollusk	FWS Region 1: Pacific	GU	Yes	https://ecos.fws.gov/docs/recovery_plan/SIGNED%20-%20Mariana%20Islands%20dRP%20(20221129).pdf	Listed in Summary table as one of the most pressing threats to the species.	2022	Yes	https://ecos.fws.gov/docs/recovery_plan/SIGNED%20-%20Mariana%20Islands%20dRP%20(20221129).pdf	"While having redundant and resilient populations distributed throughout a species’ range is a hallmark of most recovery criteria, the periodic and extremely destructive potential of typhoons, which will likely increase with climate change, indicates that conservation translocations will be particularly important to the recovery of 23 species." Also mentions modeling and adaptive management.	2022	2020 Five-year review was a Yes/No https://ecos.fws.gov/docs/five_year_review/doc6495.pdf
318	Partulina semicarinata	Snail, Lanai tree (1)	Invertebrate	Mollusk	FWS Region 1: Pacific	HI	Yes	https://ecos.fws.gov/docs/recovery_plan/Maui_Nui_Draft_RP_20211217_Signed.pdf	Discussed under both Factor A and Factor E.	2021	Yes	https://ecos.fws.gov/docs/recovery_plan/Maui_Nui_Draft_RP_20211217_Signed.pdf	Research needed, also translocation outside of historic range may be necessary to climate adaptation.	2021	2019 Recovery Outline was a Y/Study https://ecos.fws.gov/docs/recovery_plan/Maui_Nui_Recovery_Outline_20191031.pdf
319	Partulina variabilis	Snail, Lanai tree (2)	Invertebrate	Mollusk	FWS Region 1: Pacific	HI	Yes	https://ecos.fws.gov/docs/recovery_plan/Maui_Nui_Draft_RP_20211217_Signed.pdf	Discussed under both Factor A and Factor E.	2021	Yes	https://ecos.fws.gov/docs/recovery_plan/Maui_Nui_Draft_RP_20211217_Signed.pdf	Research needed, also translocation outside of historic range may be necessary to climate adaptation.	2021	2019 Recovery Outline was a Y/Study https://ecos.fws.gov/docs/recovery_plan/Maui_Nui_Recovery_Outline_20191031.pdf
343	Parvaspina (fmr. Pleurobema) collina	Spinymussel, James	Invertebrate	Mollusk	FWS Region 5: Northeast	NC, VA, WV	Yes	https://ecos.fws.gov/docs/tess/species_nonpublish/4027.pdf	Discussed in detail under Factor E. Hurricane and flood events, juvenile mortality, but also possible benefit from primary productivity. Also mentions potential host fish interactions changing (one of our sensitivity factors).	2022	Yes	https://ecos.fws.gov/docs/tess/species_nonpublish/4027.pdf	Climate is explicitly mentioned as a factor under representation.	2022	Name change: Parvaspina collina
79	Patagioenas (fmr. Columba) inornata wetmorei	Pigeon, Puerto Rican plain	Vertebrate	Bird	FWS Region 4: Southeast	PR	Yes	https://ecos.fws.gov/docs/tess/species_nonpublish/2707.pdf		2019	No	https://ecos.fws.gov/docs/tess/species_nonpublish/2707.pdf		2019	Genus name has changed to Patagioenas
320	Pegias fabula	Pearlymussel, littlewing	Invertebrate	Mollusk	FWS Region 4: Southeast	AL, KY, NC, TN, VA	Yes	https://ecos.fws.gov/docs/five_year_review/doc6319.pdf	"we consider climate change to be a potential threat"	2020	No	https://ecos.fws.gov/docs/five_year_review/doc6319.pdf		2020
462 (2020 Listing)	Pekania pennanti	Fisher, Sierra Nevada	Vertebrate	Mammal	FWS Region 8: Pacific Southwest	CA	Yes	https://www.govinfo.gov/content/pkg/FR-2021-10-19/pdf/2021-22449.pdf#page=1	CH designation mentions climate change as a threat.	2021	Yes	https://www.govinfo.gov/content/pkg/FR-2021-10-19/pdf/2021-22449.pdf#page=1	Special management consideration in critical habitat	2021
321	Percina antesella	Darter, amber	Vertebrate	Fish	FWS Region 4: Southeast	GA, TN	Yes	https://ecos.fws.gov/docs/tess/species_nonpublish/3244.pdf	"increasing water temperatures, altered discharge (e.g., high spring flows), and interactions among these and other factors."	2021	Yes	https://ecos.fws.gov/docs/tess/species_nonpublish/3244.pdf	Nothing under recommendations section, but "In the Conasauga and Etowah basins, strategically restoring and conserving areas that support species or suitable habitat, including potential habitat in areas upstream with cooler temperatures, ensuring habitat connectivity, and active approaches such as controlled propagation and reintroduction will be key components in helping the amber darter adapt …	2021	There was also a 2019 SSA that was also a Y/ N https://ecos.fws.gov/ServCat/DownloadFile/168775
322	Percina jenkinsi	Logperch, Conasauga	Vertebrate	Fish	FWS Region 4: Southeast	GA, TN	Yes	https://ecos.fws.gov/docs/recovery_plan/Conasauga%20Logperch%20Recovery%20Plan%20Signed_FINAL_2.pdf		2019	No	https://ecos.fws.gov/docs/recovery_plan/Conasauga%20Logperch%20Recovery%20Plan%20Signed_FINAL_2.pdf		2019	There was also a 2019 Five-year review that was also a Yes/No https://ecos.fws.gov/docs/five_year_review/doc6299.pdf
323	Percina rex	Logperch, Roanoke	Vertebrate	Fish	FWS Region 5: Northeast	NC, VA	Yes	https://ecos.fws.gov/docs/tess/species_nonpublish/4026.pdf	"The primary threat to the RLP identified since the 2007 5-year review is changing climate." References to the SSA for more detailed discussion.	2022	No	https://ecos.fws.gov/docs/tess/species_nonpublish/4026.pdf	Species is recommended for delisting due to recovery.	2022	As of end of 2022, no delisting proposal.
324	Perognathus longimembris pacificus	Mouse, Pacific pocket	Vertebrate	Mammal	FWS Region 8: Pacific Southwest	CA	Yes	https://ecos.fws.gov/docs/five_year_review/doc6589.pdf	"Increased wet and dry extremes, and the resulting increases or decreases in forb and grass cover, may increase the variability in inter-annual PPM occupancy in the future."	2020	No	https://ecos.fws.gov/docs/five_year_review/doc6589.pdf		2020
325	Peromyscus gossypinus allapaticola	Mouse, Key Largo cotton	Vertebrate	Mammal	FWS Region 4: Southeast	FL	Yes	https://ecos.fws.gov/docs/tess/species_nonpublish/943.pdf	"the effects of climate change could reduce the species’ capacity to recover from stochastic events (e.g., hurricanes, flooding, disease)."	2021	Yes	https://ecos.fws.gov/docs/tess/species_nonpublish/943.pdf	"Develop potential adaptation strategies to moderate or delay effects of sea level rise on KLCM. For example, increase connectivity where sea level is likely to cause fragmentation."	2021
326	Peromyscus polionotus allophrys	Mouse, Choctawhatchee beach	Vertebrate	Mammal	FWS Region 4: Southeast	FL	Yes	https://ecos.fws.gov/docs/recovery_plan/Chocatawhatchee%20Beach%20Mouse_Final_12-6-2019.pdf		2019	Yes	https://ecos.fws.gov/docs/recovery_plan/Chocatawhatchee%20Beach%20Mouse_Final_12-6-2019.pdf	The several new Recovery Plan amendments for beach mouse subspecies contain the same general language updating recovery criteria to account for SLR.	2019	There was also a 2019 Five-year review that was a Yes/Study https://ecos.fws.gov/docs/five_year_review/doc6290.pdf
327	Peromyscus polionotus ammobates	Mouse, Alabama beach	Vertebrate	Mammal	FWS Region 4: Southeast	AL	Yes	https://ecos.fws.gov/docs/recovery_plan/Alabama%20Beach%20Mouse%20Recovery%20Plan%20Amendment_1.pdf		2019	Yes	https://ecos.fws.gov/docs/recovery_plan/Alabama%20Beach%20Mouse%20Recovery%20Plan%20Amendment_1.pdf	The several new Recovery Plan amendments for beach mouse subspecies contain the same general language updating recovery criteria to account for SLR.	2019	There was also a 2019 Five-year review that was a Yes/No https://ecos.fws.gov/docs/five_year_review/doc5974.pdf
328	Peromyscus polionotus peninsularis	Mouse, St. Andrew beach	Vertebrate	Mammal	FWS Region 4: Southeast	FL	Yes	https://ecos.fws.gov/docs/five_year_review/doc6315.pdf		2019	Yes	https://ecos.fws.gov/docs/five_year_review/doc6315.pdf		2019
329	Peromyscus polionotus phasma	Mouse, Anastasia Island beach	Vertebrate	Mammal	FWS Region 4: Southeast	FL	Yes	https://ecos.fws.gov/docs/recovery_plan/Anastasia%20Island%20Beach%20Mouse%20Recovery%20Plan%20Amendement_1.pdf		2019	Yes	https://ecos.fws.gov/docs/recovery_plan/Anastasia%20Island%20Beach%20Mouse%20Recovery%20Plan%20Amendement_1.pdf	The several new Recovery Plan amendments for beach mouse subspecies contain the same general language updating recovery criteria to account for SLR.	2019	There was also a 2019 Five-year review that was a Yes/Yes https://ecos.fws.gov/docs/five_year_review/doc6039.pdf
330	Peromyscus polionotus trissyllepsis	Mouse, Perdido Key beach	Vertebrate	Mammal	FWS Region 4: Southeast	FL	Yes	https://ecos.fws.gov/docs/tess/species_nonpublish/997.pdf	"Sea level rise is an increasing threat to PKBM"	2021	Yes	https://ecos.fws.gov/docs/tess/species_nonpublish/997.pdf	No explicit mention of climate change, but LIDAR data (to identify high-elevation habitat) is used to identify appropriate parcels for land acquisition.	2021
331	Phoebastria albatrus	Albatross, short-tailed	Vertebrate	Bird	FWS Region 7: Alaska	AK, CA, HI, OR, WA	Yes	https://ecos.fws.gov/docs/five_year_review/doc6487.pdf	"Climate change impacts to short-tailed albatrosses could be direct (e.g., changes to nesting habitat) or indirect (e.g., changes to prey abundance or distribution)."	2020	Study	http://ecos.fws.gov/docs/five_year_review/doc4445.pdf	The 2014 Five-year review discusses effects such as loss of low-lying nesting habitat and ocean food web change; emphasizes uncertainty, however. Recommends additional research.	2014
332	Physa natricina	Snail, Snake River physa	Invertebrate	Mollusk	FWS Region 1: Pacific	ID	Yes	https://ecos.fws.gov/docs/tess/species_nonpublish/2585.pdf	2014 Five-year review discusses metabolic and diet change, and potential water allocation conflicts. No climate-specific recommended actions. 2018 Review mentions climate, says no new info since 3014.	2018	No	https://ecos.fws.gov/docs/tess/species_nonpublish/2585.pdf	No actions in either the 2014 or the 2018 review.	2018
333	Physeter catodon	Whale, sperm	Vertebrate	Mammal	NMFS: Marine	Ak, CA, NC, PR, VA	Yes	https://repository.library.noaa.gov/view/noaa/17032	2015 Five-year review discusses climate as a possible threat, but states that species may be resilient due to huge range.	2015	Yes	http://ecos.fws.gov/docs/recovery_plan/Sperm_whale_Recovery_Plan.pdf	Recovery actions in the 2010 Plan include research and "necessary action" on this topic. 2015 Review emphasizes research only.	2010
334	Picoides borealis	Woodpecker, red-cockaded	Vertebrate	Bird	FWS Region 4: Southeast	AL, AR, FL, GA, KY, LA, MD, MO, MS, NC, OK, SC, TN, TX, VA	Yes	https://www.govinfo.gov/content/pkg/FR-2020-10-08/pdf/2020-21510.pdf	"Increases in number and severity of major hurricanes is expected to increase in response to global climate change, and this could also disproportionately affect the smaller, less resilient woodpecker populations"	2020	No	https://www.govinfo.gov/content/pkg/FR-2020-10-08/pdf/2020-21510.pdf		2020	Two 2020 documents: SSA & Reclassification Proposal (10/8/2020)
335	Plagopterus argentissimus	Woundfin	Vertebrate	Fish	FWS Region 6: Mountain Prairie	AZ, NV, NM, UT	Yes	https://ecos.fws.gov/docs/five_year_review/doc6414.pdf	"If the effects of climate change continue as projected in the Virgin River Basin, environmental stressors will likely become amplified, as will their effects on the native fish populations."	2020	No	https://ecos.fws.gov/docs/five_year_review/doc6414.pdf		2020
337	Plethobasus cicatricosus	Pearlymussel, white wartyback	Invertebrate	Mollusk	FWS Region 4: Southeast	AL, KY, TN	Yes	http://ecos.fws.gov/docs/five_year_review/doc4830.pdf	5-year review (2016)mentions that the speciesdwells in larger river systems but may be sensitive to altered temperatures. No actions.	2016	No	http://ecos.fws.gov/docs/five_year_review/doc4830.pdf	5-year review (2016)mentions that the speciesdwells in larger river systems but may be sensitive to altered temperatures. No actions.	2016
338	Plethobasus cooperianus	Pearlymussel, orange-foot pimpleback	Invertebrate	Mollusk	FWS Region 4: Southeast	AL, IL, KY, TN	No	https://ecos.fws.gov/docs/five_year_review/doc5700.pdf	No mention of climate in the 2018 five-year review.	2018	No	https://ecos.fws.gov/docs/five_year_review/doc5700.pdf	No mention of climate in the 2018 five-year review.	2018
339	Plethobasus cyphyus	Mussel, sheepnose	Invertebrate	Mollusk	FWS Region 3: Midwest	AL, IL, IN IA, KY, MN, MS, MO, OH, PA, VA, WV, WI	Yes	https://ecos.fws.gov/docs/five_year_review/doc6738.pdf	Climate change listed as a threat	2020	No	https://ecos.fws.gov/docs/five_year_review/doc6738.pdf		2020
340	Plethodon neomexicanus	Salamander, Jemez Mountains	Vertebrate	Amphibian	FWS Region 2: Southwest	NM	Yes	http://www.gpo.gov/fdsys/pkg/FR-2013-09-10/pdf/2013-21583.pdf	Discussed extensively in listing decision (Factor E; drought, fire, pathogen susceptibility); But mentioned only once in passing in critical habitat designation (both documents 2013).	2013	No	http://www.gpo.gov/fdsys/pkg/FR-2013-11-20/pdf/2013-27736.pdf	Discussed extensively in listing decision (Factor E; drought, fire, pathogen susceptibility); But mentioned only once in passing in critical habitat designation (both documents 2013).	2013
341	Plethodon shenandoah	Salamander, Shenandoah	Vertebrate	Amphibian	FWS Region 5: Northeast	VA	Yes	https://ecos.fws.gov/docs/recovery_plan/20190722%20Shenandoah%20salamander%20NPD%20Final%20signed.pdf		2019	Study	https://ecos.fws.gov/docs/recovery_plan/20190722%20Shenandoah%20salamander%20NPD%20Final%20signed.pdf	Though this is a supplemental finding and therefore not action-oriented, it does describe recent and planned research on clmate change impacts.	2019
469 (2022)	Pleurobema athearni	Clubshell, Canoe creek	Invertebrate	Mollusk	FWS Region 4: Southeast	AL	Yes	https://www.govinfo.gov/content/pkg/FR-2022-07-06/pdf/2022-14312.pdf#page=1	Risk factor in the critical habitat designation.	2022	No	https://www.govinfo.gov/content/pkg/FR-2022-07-06/pdf/2022-14312.pdf#page=1	No discussion in the designation itself.	2022
342	Pleurobema clava	Clubshell	Invertebrate	Mollusk	FWS Region 5: Northeast	IL, IN, KY, MI, NY, OH, PA, TN, WV	Yes	https://ecos.fws.gov/docs/five_year_review/doc6118.pdf		2019	No	https://ecos.fws.gov/docs/five_year_review/doc6118.pdf		2019
344	Pleurobema decisum	Clubshell, southern	Invertebrate	Mollusk	FWS Region 4: Southeast	AL, GA, MS	No	https://ecos.fws.gov/docs/recovery_plan/Southern%20Clubshell%20Recovery%20Plan%20Amendment_1.pdf		2019	No	https://ecos.fws.gov/docs/recovery_plan/Southern%20Clubshell%20Recovery%20Plan%20Amendment_1.pdf		2019
345	Pleurobema furvum	Pigtoe, dark	Invertebrate	Mollusk	FWS Region 4: Southeast	AL	Yes	https://ecos.fws.gov/docs/five_year_review/doc6225.pdf	Recovery plan amendment did not mention climate change, but five-year review did.	2019	No	https://ecos.fws.gov/docs/recovery_plan/Dark%20Pigtoe%20Recovery%20Plan%20Amendment.pdf	Neither 2019 document contained actions.	2019
346	Pleurobema georgianum	Pigtoe, southern	Invertebrate	Mollusk	FWS Region 4: Southeast	AL, GA, TN	Yes	https://ecos.fws.gov/docs/five_year_review/doc6226.pdf		2019	No	https://ecos.fws.gov/docs/recovery_plan/Coosa%20moccasinshell%20and%20Southern%20pigtoe%20Recovery%20Plan%20Amendment_2.pdf		2019	There was also a 2019 five-year review that was also a Yes/No https://ecos.fws.gov/docs/five_year_review/doc6226.pdf
348	Pleurobema hanleyianum	Pigtoe, Georgia	Invertebrate	Mollusk	FWS Region 4: Southeast	GA	Yes	https://ecos.fws.gov/docs/tess/species_nonpublish/966.pdf	"climate change is almost certain to affect aquatic habitats through changes in water availability and timing."	2021	No	https://ecos.fws.gov/docs/tess/species_nonpublish/966.pdf		2021
349	Pleurobema perovatum	Clubshell, ovate	Invertebrate	Mollusk	FWS Region 4: Southeast	AL, MS, TN	Yes	https://ecos.fws.gov/docs/five_year_review/doc6389.pdf	Recovery plan amendment did not mention climate change, but five-year review did.	2020	No	https://ecos.fws.gov/docs/recovery_plan/Ovate%20Clubshell%20Recovery%20Plan%20Amendment.pdf	Neither the 2019 Amendment nor the 2020 Five-year review contained actions.	2019
350	Pleurobema plenum	Pigtoe, rough	Invertebrate	Mollusk	FWS Region 4: Southeast	AL, IL, IN, KY, OH, TN, PA, VA	Yes	https://ecos.fws.gov/docs/tess/species_nonpublish/963.pdf	"Climate change can influence freshwater mussel habitat by increasing or decreasing water temperatures and precipitation patterns that increase flooding, prolong droughts, or reduce stream flows."	2021	No	https://ecos.fws.gov/docs/tess/species_nonpublish/963.pdf		2021
351	Pleurobema pyriforme	Pigtoe (mussel), oval	Invertebrate	Mollusk	FWS Region 4: Southeast	AL, FL, GA	Yes	https://ecos.fws.gov/docs/recovery_plan/Gulf%20Moccasinshell,%20Oval%20Pigtoe,%20Purple%20Bankclimber,%20Shinyrayed%20Pocketbook%20Recovery%20Plan%20Amendment.pdf	Recovery plan amendment did not mention climate change, but five-year review did.	2019	No	https://ecos.fws.gov/docs/recovery_plan/Gulf%20Moccasinshell,%20Oval%20Pigtoe,%20Purple%20Bankclimber,%20Shinyrayed%20Pocketbook%20Recovery%20Plan%20Amendment.pdf	Neither 2019 document contained actions.	2019
352	Pleurobema taitianum	Pigtoe, heavy	Invertebrate	Mollusk	FWS Region 4: Southeast	AL, MS	No	https://ecos.fws.gov/docs/tess/species_nonpublish/3478.pdf		2021	No	https://ecos.fws.gov/docs/tess/species_nonpublish/3478.pdf		2021
353	Pleurocera foremani	Hornsnail, rough	Invertebrate	Mollusk	FWS Region 4: Southeast	AL	Yes	https://ecos.fws.gov/docs/tess/species_nonpublish/4030.pdf	"Climate change has the potential to increase the vulnerability of the rough hornsnail to random catastrophic events, primarily through more intense or frequent droughts. "	2022	No	https://ecos.fws.gov/docs/tess/species_nonpublish/4030.pdf		2022
354	Pleuronaia dolabelloides	Pearlymussel, slabside	Invertebrate	Mollusk	FWS Region 4: Southeast	AL, KY, MS, NC, TN, VA	Yes	https://ecos.fws.gov/docs/tess/species_nonpublish/3386.pdf	Increased stream temps, droughts, and floods	2021	No	https://ecos.fws.gov/docs/tess/species_nonpublish/3386.pdf		2021
347	Pleuronaia gibber (fmr. Pleurobema gibberum)	Pigtoe, Cumberland	Invertebrate	Mollusk	FWS Region 4: Southeast	TN	Yes	https://ecos.fws.gov/docs/tess/species_nonpublish/3809.pdf	Increased stream temps, droughts, and floods	2022	No	https://ecos.fws.gov/docs/tess/species_nonpublish/3809.pdf		2022	name change to Pleuronaia gibber
355	Poeciliopsis occidentalis	Topminnow, Gila	Vertebrate	Fish	FWS Region 2: Southwest	AZ, NM	No	http://ecos.fws.gov/docs/recovery_plan/990305.pdf	Recovery plan is from 1999, no more recent documents available.	1999	No	http://ecos.fws.gov/docs/recovery_plan/990305.pdf	Recovery plan is from 1999, no more recent documents available.	1999
356	Polygyriscus virginianus	Snail, Virginia fringed mountain	Invertebrate	Mollusk	FWS Region 5: Northeast	VA	No	https://ecos.fws.gov/docs/tess/species_nonpublish/3243.pdf		2021	No	https://ecos.fws.gov/docs/tess/species_nonpublish/3243.pdf		2021
357	Polyphylla barbata	Beetle, Mount Hermon June	Invertebrate	Arthropod	FWS Region 8: Pacific Southwest	CA	Yes	https://ecos.fws.gov/docs/tess/species_nonpublish/958.pdf	"an increase in temperature, extreme storms, drought, and wildfire will most likely have an overall negative effect on these species."	2021	Study	https://ecos.fws.gov/docs/tess/species_nonpublish/958.pdf	"Potential effects from projected increases in temperature and variability in precipitation warrant further study to help determine the specifics of how these two species, along with the sandhills vegetative communities, will respond."	2021
358	Popenaias popeii	Texas Hornshell	Invertebrate	Mollusk	FWS Region 2: Southwest	NM, TX	Yes	https://ecos.fws.gov/docs/recovery_plan/Texas Hornshell Final Recovery Plan_508_signed.pdf	Factor E. Drought and streamflow reductions connected to climate change.	2022	Yes	https://ecos.fws.gov/docs/recovery_plan/Texas Hornshell Final Recovery Plan_508_signed.pdf	Several recovery actions are explicitly linked to climate change threat.	2022	There is also a 2022 recovery implementation strategy which links actions and activities to climate change threat. https://ecos.fws.gov/docs/recovery_plan/Texas%20Hornshell%20Recovery%20Implementation%20Strategy%202.0_508.pdf
359	Potamilus capax	Pocketbook, fat	Invertebrate	Mollusk	FWS Region 4: Southeast	AR, IA, IL, IN, KY, LA, MN, MO, MS, NE, NY, OH WI_x000D_	Yes	https://ecos.fws.gov/docs/five_year_review/doc6318.pdf	Recovery plan amendment did not mention climate change, but five-year review did.	2019	No	https://ecos.fws.gov/docs/recovery_plan/Fat%20Pocketbook%20Mussel%20Recovery%20Plan%20Amendment_1.pdf	Neither 2019 document contained actions.	2019
360	Pristis pectinata	Sawfish, smalltooth	Vertebrate	Fish	NMFS: Marine	AL, FL, GA, LA, MS, NC, SC	Yes	https://repository.library.noaa.gov/view/noaa/19253	2018 Five-year review discusses impacts, especially to mangrove juvenile habitat, and acidification.	2018	No	https://repository.library.noaa.gov/view/noaa/19253	Actions section emphasizes that many of the Recovery Plan actions have not been initiated. No climate specific actions.	2018
361	Pristis pristis	Sawfish, largetooth	Vertebrate	Fish	NMFS: Marine	AL, FL, GA, LA, MS, NC, SC	Yes	https://www.federalregister.gov/articles/2014/12/12/2014-29201/endangered-and-threatened-wildlife-and-plants-final-endangered-listing-of-five-species-of-sawfish	Listing decision (2014) briefly mentions climate change may affect (various) sawfish; emphasizes uncertainty.	2014	N/A	https://www.federalregister.gov/articles/2014/12/12/2014-29201/endangered-and-threatened-wildlife-and-plants-final-endangered-listing-of-five-species-of-sawfish	No other documents available.	2014
362	Procaris hawaiana	Anchialine pool Shrimp	Invertebrate	Arthropod	FWS Region 1: Pacific	HI	Yes	https://ecos.fws.gov/docs/recovery_plan/Hawaiian_Archipelago_Recovery_Plan_20221214.pdf	Factor A, E. "Despite having been part of a NAR since 1983, the anchialine pools at Manukā are threatened by nonnative species, trash, human waste, development, and climate change." Sea level rise, flooding.	2022	Yes	https://ecos.fws.gov/docs/recovery_plan/Hawaiian_Archipelago_Recovery_Plan_20221214.pdf	Climate-informed habitat models, possible translocation to new or unoccupied pools.	2022	There was also a 2020 five-year review that was a Yes/Study https://ecos.fws.gov/docs/five_year_review/doc6581.pdf
363	Pseudemys alabamensis	Turtle, Alabama red-belly	Vertebrate	Reptile	FWS Region 4: Southeast	AL, MS	Yes	https://ecos.fws.gov/docs/tess/species_nonpublish/3317.pdf	"Sea level rise and hurricanes are increasing due to climate change and impact Alabama red-bellied turtle habitat by decreasing submerged aquatic vegetation and water quality."	2021	No	https://ecos.fws.gov/docs/tess/species_nonpublish/3317.pdf		2021
364	Pseudemys rubriventris bangsi	Turtle, Plymouth redbelly	Vertebrate	Reptile	FWS Region 5: Northeast	MA	Yes	https://ecos.fws.gov/docs/tess/species_nonpublish/3686.pdf	Listed as a threat, but effects uncertain	2022	No	https://ecos.fws.gov/docs/tess/species_nonpublish/3686.pdf		2022
365	Pseudocopaeodes eunus obscurus	Skipper, Carson wandering	Invertebrate	Arthropod	FWS Region 8: Pacific Southwest	CA, NV	Yes	http://ecos.fws.gov/docs/five_year_review/doc4039.pdf	2012 Five-year review describes climate change as a new threat not identified at listing, but emphasizes uncertainty. No climate-specific actions or recommendations.	2012	No	https://ecos.fws.gov/docs/tess/species_nonpublish/3908.pdf		2022	No climate mention in 2022 doc.
366	Pseudonestor xanthophrys	Parrotbill, Maui	Vertebrate	Bird	FWS Region 1: Pacific	HI	Yes	https://ecos.fws.gov/docs/tess/species_nonpublish/2543.pdf	2014 and 2018Five-year reviews briefly mention climate as an emerging threat (mosquito-borne diseases). Recommends research	2018	Study	https://ecos.fws.gov/docs/tess/species_nonpublish/2543.pdf	2014 and 2018Five-year reviews briefly mention climate as an emerging threat (mosquito-borne diseases). Recommends research	2018
367	Pseudorca crassidens	Whale, False killer	Vertebrate	Mammal	NMFS: Marine	FL, GA, HI, NC, OR, SC, TX	Yes	https://www.fisheries.noaa.gov/resource/document/final-recovery-plan-and-recovery-implementation-strategy-main-hawaiian-islands	One of the threats assessed.	2022	No	https://www.fisheries.noaa.gov/resource/document/final-recovery-plan-and-recovery-implementation-strategy-main-hawaiian-islands	Recovery plan contains objectives to understand and minimize the threat of climate change.	2021
368	Pseudotryonia adamantina	Tryonia, Diamond	Invertebrate	Mollusk	FWS Region 2: Southwest	TX	Yes	https://ecos.fws.gov/docs/five_year_review/doc6200.pdf		2019	No	https://ecos.fws.gov/docs/five_year_review/doc6200.pdf		2019
369	Pterodroma cahow	Cahow	Vertebrate	Bird	FWS Region 4: Southeast	Bermuda	Yes	https://ecos.fws.gov/docs/tess/species_nonpublish/2761.pdf	Brief mention of threat	2019	No	https://ecos.fws.gov/docs/tess/species_nonpublish/2761.pdf	No climate actions.	2019
370	Pterodroma sandwichensis (fmr. P. phaeopygia sandwichensis)	Petrel, Hawaiian dark-rumped	Vertebrate	Bird	FWS Region 1: Pacific	HI	Yes	https://ecos.fws.gov/docs/tess/species_nonpublish/3885.pdf	Listed as possible threat	2022	Study	https://ecos.fws.gov/docs/tess/species_nonpublish/3885.pdf	"Support collaborative climate change modelling and research to help guide future management actions for 'Hawaiian petrel protection and recovery."	2022	Name has changed to Pterodroma sandwichensis
371	Ptychobranchus greenii	Kidneyshell, triangular	Invertebrate	Mollusk	FWS Region 4: Southeast	AL	Yes	https://ecos.fws.gov/docs/five_year_review/doc6228.pdf	Recovery plan amendment did not mention climate change, but five-year review did.	2019	No	https://ecos.fws.gov/docs/recovery_plan/Triangular%20Kidneyshell%20Recovery%20Plan%20Amendment_1.pdf	Neither 2019 document contained actions.	2019
372	Ptychobranchus jonesi	Kidneyshell, southern	Invertebrate	Mollusk	FWS Region 4: Southeast	AL, FL	Yes	https://ecos.fws.gov/docs/tess/species_nonpublish/3970.pdf	changes to hydrology, increasing temperatures, and sea level rise	2022	Yes	https://ecos.fws.gov/docs/tess/species_nonpublish/3970.pdf	"Model future precipitation, temperature, and flow scenarios in the basins to examine the impacts of climate change and consumptive uses. Also model future sea level and flow scenarios to analyze the effects of saltwater encroachment in the lower mainstems during high tide and storm surge events. Use the assessments to develop SSAs and recovery plans for the species."	2022
373	Ptychobranchus subtentus	Kidneyshell, fluted	Invertebrate	Mollusk	FWS Region 4: Southeast	AL, KY, TN, VA	Yes	https://ecos.fws.gov/docs/recovery_plan/Fluted Kidneyshell_Final RP.pdf	One mention of climate effects on hydrology.	2022	No	https://ecos.fws.gov/docs/recovery_plan/Fluted Kidneyshell_Final RP.pdf		2022
374	Ptychocheilus lucius	Pikeminnow, Colorado	Vertebrate	Fish	FWS Region 6: Mountain Prairie	AZ, CA, CO, NM, UT	Yes	https://ecos.fws.gov/docs/recovery_plan/20220906_CPM_DraftRP_v8_DRDsigned.pdf	Brief mention of drought and reduced stream flow.	2022	Yes	https://ecos.fws.gov/docs/recovery_plan/20220906_CPM_DraftRP_v8_DRDsigned.pdf	Flow management in response to climate effects on hydrology. Explore reingroduction efforts, including in areas outside of current distribution.	2022
209	Puma (fmr. Herpailurus) yagouaroundi cacomitli	Jaguarundi (TX)	Vertebrate	Mammal	FWS Region 2: Southwest	TX	Yes	http://ecos.fws.gov/docs/recovery_plan/FINAL%20Gulf%20Coast%20Jaguarundi%20Recovery%20Plan.pdf	Recovery plan (2013): Climate change is described as an uncertain but potentially significant threat. Actions include monitoring, and providing supplemental water during drought.	2013	Yes	http://ecos.fws.gov/docs/recovery_plan/FINAL%20Gulf%20Coast%20Jaguarundi%20Recovery%20Plan.pdf	Recovery plan (2013): Climate change is described as an uncertain but potentially significant threat. Actions include monitoring, and providing supplemental water during drought.	2013	2018 Five-year review does not mention cliamte change)
375	Puma concolor	Panther, Florida	Vertebrate	Mammal	FWS Region 4: Southeast	FL	No	http://ecos.fws.gov/docs/recovery_plan/081218.pdf	2008 Recovery plan ranks "natural climate or environmental change" as a Low threat. No mention of climate change in Five-year review (2009).	2008	No	http://ecos.fws.gov/docs/recovery_plan/081218.pdf	No actions	2008
376	Pyrgulopsis bruneauensis	Springsnail, Bruneau Hot	Invertebrate	Mollusk	FWS Region 1: Pacific	ID	No	https://ecos.fws.gov/docs/tess/species_nonpublish/2602.pdf	Climate not mentioned	2018	No	https://ecos.fws.gov/docs/tess/species_nonpublish/2602.pdf	Climate not mentioned	2018
377	Pyrgulopsis chupaderae	Springsnail, Chupadera	Invertebrate	Mollusk	FWS Region 2: Southwest	NM	Yes	https://ecos.fws.gov/docs/tess/species_nonpublish/2978.pdf	Likely impacts, substantial uncertainty	2019	Yes	https://ecos.fws.gov/docs/tess/species_nonpublish/2978.pdf	"Address climate change in the recovery plan, incorporate recovery goals to address climate change"	2019
378	Pyrgulopsis neomexicana	Springsnail, Socorro	Invertebrate	Mollusk	FWS Region 2: Southwest	NM	Yes	https://ecos.fws.gov/docs/five_year_review/doc6502.pdf	"If climatic and hydrologic changes are extreme, the Socorro springsnail may not be able to persist in its current habitat."	2020	No	https://ecos.fws.gov/docs/five_year_review/doc6502.pdf		2020
379	Pyrgulopsis ogmorhaphe	Marstonia, royal	Invertebrate	Mollusk	FWS Region 4: Southeast	TN	No	https://ecos.fws.gov/docs/five_year_review/doc6380.pdf		2020	No	https://ecos.fws.gov/docs/recovery_plan/Royal%20Snail%20Recovery%20Plan%20Amendment.pdf		2019	Both the 2019 recovery plan amendment and the 2020 five-year review were a No/No
380	Pyrgulopsis pachyta	Snail, armored	Invertebrate	Mollusk	FWS Region 4: Southeast	AL	Yes	https://ecos.fws.gov/docs/five_year_review/doc6516.pdf	"Climate change has the potential to increase the vulnerability of the snail to random catastrophic events, primarily through more intense or frequent droughts."	2020	No	https://ecos.fws.gov/docs/five_year_review/doc6516.pdf		2020
381	Pyrgulopsis roswellensis	Springsnail, Roswell	Invertebrate	Mollusk	FWS Region 2: Southwest	NM	Yes	https://ecos.fws.gov/docs/five_year_review/doc6398.pdf	Potential for increased impacts from drought and climate change exists... Climate-related effects including prolonged droughts and decreases in spring discharge could further exacerbate the impacts to water quantity and quality.	2019	Yes	https://ecos.fws.gov/docs/recovery_plan/Final%20Recovery%20Plan%20Four%20Invertebrates%20of%20Pecos%20River%20Valley_1.pdf	No actions in the 2020 five-year review	2019
382	Pyrgulopsis texana	Springsnail, Phantom	Invertebrate	Mollusk	FWS Region 2: Southwest	TX	Yes	(http://www.gpo.gov/fdsys/pkg/FR-2013-07-09/pdf/2013-16222.pdf	Discussed as a factor in listing (particularly due to hydrologic impacts); not mentioned in critical habitat designation; no other recovery documents available.	2013	No	http://www.gpo.gov/fdsys/pkg/FR-2013-07-09/pdf/2013-16230.pdf	Discussed as a factor in listing (particularly due to hydrologic impacts); not mentioned in critical habitat designation; no other recovery documents available.	2013
383	Pyrgulopsis trivialis	Springsnail, Three Forks	Invertebrate	Mollusk	FWS Region 2: Southwest	AZ	Yes	https://ecos.fws.gov/docs/tess/species_nonpublish/3948.pdf	drought, wildfire, contaminants, and flooding and erosion/deposition.	2022	No	https://ecos.fws.gov/docs/tess/species_nonpublish/3948.pdf		2022
384	Pyrgus ruralis lagunae	Skipper, Laguna Mountains	Invertebrate	Arthropod	FWS Region 8: Pacific Southwest	CA	Yes	https://ecos.fws.gov/docs/recovery_plan/LMS%20RP_Signed.pdf	Climate change is one of the most important threats.	2019	Yes	https://ecos.fws.gov/docs/recovery_plan/LMS%20RP_Signed.pdf	This is one of the better climate examples. One of the delisting criteria is "A climate-smart management plan is developed and implemented that identifies the conservation needs of the species and includes adaptive management that mitigates the anticipated and observed climate change effects, including any changes in fire frequency and intensity, on otherwise resilient populations. (Factors A and…	2019	There was also a 2019 five-year review that was a Yes/No https://ecos.fws.gov/docs/five_year_review/doc5994.pdf
385	Quadrula cylindrica strigillata	Rabbitsfoot, rough	Invertebrate	Mollusk	FWS Region 5: Northeast	TN, VA	No	http://ecos.fws.gov/docs/recovery_plan/040524.pdf	Most recent recovery document (Recovery Plan) is from 2004; climate change not mentioned.	2004	No	http://ecos.fws.gov/docs/recovery_plan/040524.pdf	Most recent recovery document (Recovery Plan) is from 2004; climate change not mentioned.	2004
386	Quadrula fragosa	Mapleleaf, winged	Invertebrate	Mollusk	FWS Region 3: Midwest	AR, IA, IL, IN, KS, KY, MN, MO, OH, OK, SD, TN, WI_x000D_	No	https://ecos.fws.gov/docs/tess/species_nonpublish/3379.pdf	2015 Five-year review does not mention climate change.	2015	No	https://ecos.fws.gov/docs/tess/species_nonpublish/3379.pdf	2015 Five-year review does not mention climate change.	2015
388	Quadrula sparsa	Monkeyface, Appalachian	Invertebrate	Mollusk	FWS Region 5: Northeast	AL, TN, VA	Yes	https://ecos.fws.gov/docs/five_year_review/doc6575.pdf	"climate change could put mussels closer to their thermal limits"	2020	No	https://ecos.fws.gov/docs/five_year_review/doc6575.pdf		2020
389	Rallus longirostris levipes	Rail, light-footed clapper	Vertebrate	Bird	FWS Region 8: Pacific Southwest	CA	Yes	https://ecos.fws.gov/docs/five_year_review/doc6448.pdf	"hydrological changes and the effects of climate change and sea level rise threaten the persistence of this subspecies"	2020	Yes	https://ecos.fws.gov/docs/recovery_plan/APG%20Amendment%20LFRR.pdf		2009	2019 and 2020 documents were both a Yes/No
390	Rallus longirostris obsoletus	Rail, California clapper	Vertebrate	Bird	FWS Region 8: Pacific Southwest	CA	Yes	https://ecos.fws.gov/docs/five_year_review/doc6592.pdf	"the local effect of sea-level rise associated with global climate change, was identified as the most central threat to the long-term survival of the California clapper rail."	2020	Yes	https://ecos.fws.gov/docs/five_year_review/doc6592.pdf		2014
391	Rallus longirostris yumanensis	Rail, Yuma clapper	Vertebrate	Bird	FWS Region 2: Southwest	AZ, CA, NV	Yes	http://ecos.fws.gov/docs/recovery_plan/Draft%20Yuma%20Clapper%20Rail%20Recovery%20Plan,%20First%20Revision.pdf	Recovery plan (2010) has general discussion of climate change, emphasizes uncertainty. No climate-specific recovery actions are included.	2010	No	http://ecos.fws.gov/docs/recovery_plan/Draft%20Yuma%20Clapper%20Rail%20Recovery%20Plan,%20First%20Revision.pdf	Recovery plan (2010) has general discussion of climate change, emphasizes uncertainty. No climate-specific recovery actions are included.	2010
392	Rallus owstoni	Rail, Guam	Vertebrate	Bird	FWS Region 1: Pacific	GU	No	https://ecos.fws.gov/docs/five_year_review/doc6767.pdf		2020	No	https://ecos.fws.gov/docs/recovery_plan/Guam_Rail_Final_Recovery_Plan_Amendment_20190820.pdf		2019	2019 and 2020 documents were both a No/No
393	Rana muscosa	Frog, mountain yellow-legged	Vertebrate	Amphibian	FWS Region 8: Pacific Southwest	CA, NV	Yes	https://ecos.fws.gov/docs/recovery_plan/Southern%20CA%20MYLF%20RIS.pdf		2019	Yes	https://ecos.fws.gov/docs/recovery_plan/Southern%20CA%20MYLF%20RIS.pdf		2019	There was also a 2019 Five-year review that was a Yes/No https://ecos.fws.gov/docs/five_year_review/doc5998.pdf
394	Rana sevosa (fmr. R. capito sevosa)	Frog, Mississippi gopher	Vertebrate	Amphibian	FWS Region 4: Southeast	MS	Yes	https://ecos.fws.gov/docs/tess/species_nonpublish/3504.pdf	increasing drought	2021	Yes	http://ecos.fws.gov/docs/five_year_review/doc4615.pdf	2015 Recovery Plan and Five-year Review briefly discuss potential effects (hydroperiod, breeding timing, etc.); Review recommends tadpole rearing as a safeguard for these events.	2015
395	Rana sierrae	Frog, Sierra Nevada yellow-legged	Vertebrate	Amphibian	FWS Region 8: Pacific Southwest	CA	Yes	http://www.gpo.gov/fdsys/pkg/FR-2014-04-29/pdf/2014-09488.pdf	Listing decision (2014) discusses climate change threats at length	2014	No	https://www.gpo.gov/fdsys/pkg/FR-2016-08-26/pdf/2016-20352.pdf	critical habitat designation (2016) mentions climate change, but gives it more consideration in designation (in same rule) for Yosemite Toad (T).	2016
396	Rangifer tarandus caribou	Caribou, woodland	Vertebrate	Mammal	FWS Region 1: Pacific	ID, WA	Yes	https://ecos.fws.gov/docs/recovery_plan/Southern_Mountain_Caribou_Recovery_Outline_Signed_20191127.pdf		2019	Yes	https://ecos.fws.gov/docs/recovery_plan/Southern_Mountain_Caribou_Recovery_Outline_Signed_20191127.pdf		2019	The species profile page lists species as proposed for downlisting to T, but the E final rule is from 2019 and I don't see anything more recent.
174	Reginaia (fmr. Fusconaia) rotulata	Ebonyshell, round	Invertebrate	Mollusk	FWS Region 4: Southeast	AL, FL	Yes	https://ecos.fws.gov/docs/tess/species_nonpublish/3970.pdf	changes to hydrology, increasing temperatures, and sea level rise	2022	Yes	https://ecos.fws.gov/docs/tess/species_nonpublish/3970.pdf	"Model future precipitation, temperature, and flow scenarios in the basins to examine the impacts of climate change and consumptive uses. Also model future sea level and flow scenarios to analyze the effects of saltwater encroachment in the lower mainstems during high tide and storm surge events. Use the assessments to develop SSAs and recovery plans for the species."	2022	Genus name changed from Fusconaia to Reginaia)
397	Reithrodontomys raviventris	Mouse, salt marsh harvest	Vertebrate	Mammal	FWS Region 8: Pacific Southwest	CA	Yes	https://ecos.fws.gov/docs/tess/species_nonpublish/3643.pdf	"Sea-level rise is expected to increasingly threaten tidal marsh habitat extent and condition"	2022	Yes	https://ecos.fws.gov/docs/tess/species_nonpublish/3643.pdf	Not mentioned under recommendations, but mentioned under Factor A: "as climate change and sea level rise are predicted to threaten coastal marshes, a recovery strategy for salt marsh harvest mice could incorporate managed wetlands."	2022
398	Rhadine exilis	Ground beetle, [unnamed]	Invertebrate	Arthropod	FWS Region 2: Southwest	TX	Yes	https://ecos.fws.gov/docs/tess/species_nonpublish/3578.pdf	"If surface temperature increases and longer dry periods and reduced soil moisture lead to changes in the climate of the deep cave zones, this could reduce or eliminate available habitat within occupied caves"	2021	Yes	http://ecos.fws.gov/docs/recovery_plan/Final%202001%20Bexar%20Co%20Invertebrates%20Rec%20Plan_1.pdf	2011 Recovery plan discusses changes to hydrology and above-ground vegetation; Recovery action table says that all of their habitat protection & management and monitoring and research actions are aimed at addressing climate change (though they aren't specific about how.)	2011
399	Rhadine infernalis	Ground beetle, [unnamed]	Invertebrate	Arthropod	FWS Region 2: Southwest	TX	Yes	https://ecos.fws.gov/docs/tess/species_nonpublish/3579.pdf	"If surface temperature increases and longer dry periods and reduced soil moisture lead to changes in the climate of the deep cave zones, this could reduce or eliminate available habitat within occupied caves"	2021	Yes	http://ecos.fws.gov/docs/recovery_plan/Final%202001%20Bexar%20Co%20Invertebrates%20Rec%20Plan_1.pdf	2011 Recovery plan discusses changes to hydrology and above-ground vegetation; Recovery action table says that all of their habitat protection & management and monitoring and research actions are aimed at addressing climate change (though they aren't specific about how.)	2011
400	Rhadine persephone	Beetle, Tooth Cave ground	Invertebrate	Arthropod	FWS Region 2: Southwest	TX	No	https://ecos.fws.gov/docs/recovery_plan/Final%20RP%20Amendment%20Travis-Williamson%20Karst%20Inverts.pdf		2019	No	https://ecos.fws.gov/docs/recovery_plan/Final%20RP%20Amendment%20Travis-Williamson%20Karst%20Inverts.pdf		2019
401	Rhaphiomidas terminatus abdominalis	Fly, Delhi Sands flower-loving	Invertebrate	Arthropod	FWS Region 8: Pacific Southwest	CA	No	https://ecos.fws.gov/docs/tess/species_nonpublish/3499.pdf		2021	No	https://ecos.fws.gov/docs/tess/species_nonpublish/3499.pdf		2021
402	Rhinichthys osculus lethoporus	Dace, Independence Valley speckled	Vertebrate	Fish	FWS Region 8: Pacific Southwest	NV	Yes	http://ecos.fws.gov/docs/five_year_review/doc4174.pdf) 5-year reviews	Climate change is discussed in both the 2008 and 2013 Five-year reviews, but emphasizes uncertainty and does not have climate-specific actions or recommendations.	2013	No	http://ecos.fws.gov/docs/five_year_review/doc4174.pdf) 5-year reviews	Climate change is discussed in both the 2008 and 2013 Five-year reviews, but emphasizes uncertainty and does not have climate-specific actions or recommendations.	2013
403	Rhinichthys osculus nevadensis	Dace, Ash Meadows speckled	Vertebrate	Fish	FWS Region 8: Pacific Southwest	NV	Yes	https://ecos.fws.gov/docs/tess/species_nonpublish/3302.pdf	"likely reduced springflow"	2021	No	https://ecos.fws.gov/docs/tess/species_nonpublish/3302.pdf		2021
404	Rhinichthys osculus oligoporus	Dace, Clover Valley speckled	Vertebrate	Fish	FWS Region 8: Pacific Southwest	NV	Yes	https://ecos.fws.gov/docs/tess/species_nonpublish/3907.pdf	"During the last 5-year review an additional threat of climate change was identified (Service 2012)."	2022	No	https://ecos.fws.gov/docs/tess/species_nonpublish/3907.pdf		2022
405	Rhinichthys osculus thermalis	Dace, Kendall Warm Springs	Vertebrate	Fish	FWS Region 6: Mountain Prairie	WY	Yes	https://ecos.fws.gov/docs/recovery_plan/First%20Revised%20Kendall%20Warm%20Springs%20Dace%20Recovery%20plan_10.14.2015.pdf	2015 Recovery Plan Discusses climate change (in Factor A) but ranks it as a low threat due to the deep groundwater sourcing of the Kendall warm spring. No actions.	2015	No	https://ecos.fws.gov/docs/tess/species_nonpublish/3918.pdf		2022
406	Rostrhamus sociabilis plumbeus	Kite, Everglade snail	Vertebrate	Bird	FWS Region 4: Southeast	FL	No	https://ecos.fws.gov/docs/recovery_plan/Everglade%20Snail%20Kite%20Recovery%20Plan%20Amendment.pdf		2019	Yes	https://ecos.fws.gov/docs/recovery_plan/Everglade%20Snail%20Kite%20Recovery%20Plan%20Amendment.pdf		2019
407	Salmo salar	Salmon, Atlantic	Vertebrate	Fish	FWS Region 5: Northeast	ME	Yes	https://ecos.fws.gov/docs/five_year_review/doc6760.pdf	"climate change is having significant impacts"	2020	Yes	https://ecos.fws.gov/docs/five_year_review/doc6760.pdf	Recommendations include "Develop and implement a geographically explicit freshwater protection, restoration, and enhancement strategy for the GoM DPS that will explicitly consider protection of climate-resilient spawning and rearing habitats in the face of climate change."	2020
408	Samoana fragilis	Fragile tree snail	Invertebrate	Mollusk	FWS Region 1: Pacific	GU, NMI	Yes	https://ecos.fws.gov/docs/recovery_plan/SIGNED%20-%20Mariana%20Islands%20dRP%20(20221129).pdf	Listed in Summary table as one of the most pressing threats to the species.	2022	Yes	https://ecos.fws.gov/docs/recovery_plan/SIGNED%20-%20Mariana%20Islands%20dRP%20(20221129).pdf	"While having redundant and resilient populations distributed throughout a species’ range is a hallmark of most recovery criteria, the periodic and extremely destructive potential of typhoons, which will likely increase with climate change, indicates that conservation translocations will be particularly important to the recovery of 23 species." Also mentions modeling and adaptive management.	2022
409	Scaphirhynchus albus	Sturgeon, pallid	Vertebrate	Fish	FWS Region 6: Mountain Prairie	AR, IL, IA, KS, KY, LA, MO, MS, MT, NE, ND, SD	Yes	https://ecos.fws.gov/docs/tess/species_nonpublish/3456.pdf	Water temperature increases and other impacts	2021	Yes	http://ecos.fws.gov/docs/recovery_plan/Pallid%20Sturgeon%20Recovery%20Plan%20First%20Revision%20signed%20version%20012914_3.pdf	2014 Recovery Plan discussess potential impacts to runoff and hydrology, and includes actions to maintain these in a changing climate.	2014
410	Sebastes paucispinis	Bocaccio	Vertebrate	Fish	NMFS: Marine	WA	Yes	https://repository.library.noaa.gov/view/noaa/16866	Detailed appendix on climate impacts	2016	Yes	https://repository.library.noaa.gov/view/noaa/16866	Recovery actions include research and actions to understand and reduce the impacts of climate change.	2016
101	Setophaga (fmr. Dendroica) chrysoparia	Warbler, golden-cheeked	Vertebrate	Bird	FWS Region 2: Southwest	TX	Yes	http://ecos.fws.gov/docs/five_year_review/doc4434.pdf	Five-year review (2014) discusses climate effects on wildfire and range shifts, but nonetheless emphasizes uncertainty: "All possible impacts from climate change cannot presently be predicted." Recommends research to better understand habitat impacts.	2014	Study	http://ecos.fws.gov/docs/five_year_review/doc4434.pdf	Five-year review (2014) discusses climate effects on wildfire and range shifts, but nonetheless emphasizes uncertainty: "All possible impacts from climate change cannot presently be predicted." Recommends research to better understand habitat impacts.	2014
102 (Delisted)	Setophagus (fmr. Dendroica) kirtlandii	Warbler, Kirtland's	Vertebrate	Bird	FWS Region 3: Midwest	FL, MI, SC, WI						https://ecos.fws.gov/ecp/species/8078		2019	Delisted (genus name change to Setophaga)
411	Somatochlora hineana	Dragonfly, Hine's (=Ohio) emerald	Invertebrate	Arthropod	FWS Region 3: Midwest	IL, MI, MO, WI	Yes	http://ecos.fws.gov/docs/five_year_review/doc4337.pdf	Five-year review (2013) discusses changes to hydrology and impacts of drought; no cliamte-specific actions or recommendations.	2013	No	https://ecos.fws.gov/docs/five_year_review/doc5999.pdf	2019 Review is brief and doesn't mention climate change.	2019
412	Sorex ornatus relictus	Shrew, Buena vista lake ornate	Vertebrate	Mammal	FWS Region 8: Pacific Southwest	CA	Yes	https://ecos.fws.gov/docs/five_year_review/doc6576.pdf	"Water loss issues are ... exacerbated by changing climate."	2020	Yes	http://www.gpo.gov/fdsys/pkg/FR-2013-07-02/pdf/2013-15586.pdf	Protection from climate change-induced disturbance was one of the considerations in the 2013 Critical Habitat designation.	2013
413	Spelaeorchestia koloana	Amphipod, Kauai cave	Invertebrate	Arthropod	FWS Region 1: Pacific	HI	Yes	https://ecos.fws.gov/docs/tess/species_nonpublish/3773.pdf	increased drought	2022	Yes	https://ecos.fws.gov/docs/recovery_plan/Final_KIRP_ThreatsRecovery.pdf	Climate change vulnerability assessment is a statewide recovery action, all species, as is development of climate change adaptation strategies.	2021
414	Speoplatyrhinus poulsoni	Cavefish, Alabama	Vertebrate	Fish	FWS Region 4: Southeast	AL	No	https://ecos.fws.gov/docs/recovery_plan/Alabama%20Cavefish%20Recovery%20Plan%20Amendment_1.pdf		2019	No	https://ecos.fws.gov/docs/recovery_plan/Alabama%20Cavefish%20Recovery%20Plan%20Amendment_1.pdf		2019
415	Speyeria callippe callippe	Butterfly, callippe silverspot	Invertebrate	Arthropod	FWS Region 8: Pacific Southwest	CA	Yes	https://ecos.fws.gov/docs/five_year_review/doc6476.pdf	Climate change listed as a threat	2020	No	https://ecos.fws.gov/docs/five_year_review/doc6476.pdf		2020
416	Speyeria zerene behrensii	Butterfly, Behren's silverspot	Invertebrate	Arthropod	FWS Region 8: Pacific Southwest	CA	Yes	https://ecos.fws.gov/docs/recovery_plan/20160314_Final%20Behren's%20RP_signed.pdf	Recovery Plan (2016) discusses potential changes to phenology and habitat, but emphasizes uncertainty.	2016	Study	https://ecos.fws.gov/docs/tess/species_nonpublish/3021.pdf	2020 Five-year review has one mention of studying potential phenology change	2020
417	Speyeria zerene myrtleae	Butterfly, Myrtle's silverspot	Invertebrate	Arthropod	FWS Region 8: Pacific Southwest	CA	Yes	https://ecos.fws.gov/docs/tess/species_nonpublish/3245.pdf	"Warmer climate could lead to temporal asynchrony between larvae and host plants, or could deplete metabolic reserves in diapausal larvae."	2021	Study	http://ecos.fws.gov/docs/five_year_review/doc2394.pdf	2009 Five-year review discusses general climate change impacts and the potential for host plant range shifts/contractions. Has specific research recommendations. (No climate specific actions in 2021 Review)	2009
418 (Delisted)	Sphaerodactylus micropithecus	Gecko, Monito	Vertebrate	Reptile	FWS Region 4: Southeast	PR						https://ecos.fws.gov/ecp/species/2200		2019	Delisted
419	Sphyrna lewini	Shark, scalloped hammerhead	Vertebrate	Fish	NMFS: Marine	FL, RI	Yes	https://www.federalregister.gov/articles/2014/07/03/2014-15710/endangered-and-threatened-wildlife-and-plants-threatened-and-endangered-status-for-distinct	In response to comments in the 2014 Listing Rule, NOAA says that they found climate change not to be a current threat to the species.	2014	N/A (Not a threat)	https://www.federalregister.gov/articles/2014/07/03/2014-15710/endangered-and-threatened-wildlife-and-plants-threatened-and-endangered-status-for-distinct	In response to comments in the 2014 Listing Rule, NOAA says that they found climate change not to be a current threat to the species.	2014	There is a 2020 Review also but it refers to the 2014 document re climate,
420 (Delisted)	Sterna antillarum	Tern, least	Vertebrate	Bird	FWS Region 4: Southeast	AL, AR, AZ, CA, CO, CT, DE, FL, GA, IA, IL, IN, KS, KY, LA, MA, MD, ME, MO, MS, MT, NC, ND, NE, NH, NJ, NM, NY, OH, OK, RI, SC, SD, TN, TX, VA						https://ecos.fws.gov/ecp/species/8505		2021	Delisted
421	Sterna antillarum browni	Tern, California least	Vertebrate	Bird	FWS Region 8: Pacific Southwest	AZ, CA	Yes	https://ecos.fws.gov/docs/five_year_review/doc6449.pdf	Climate change listed as a threat	2020	No	https://ecos.fws.gov/docs/five_year_review/doc6449.pdf		2020
422	Sterna dougallii dougallii	Tern, roseate	Vertebrate	Bird	FWS Region 5: Northeast	CT, ME, MA, NH, NJ, NY, NC, RI, VA	Yes	https://ecos.fws.gov/docs/five_year_review/doc6559.pdf	Climate change could have multiple effects	2020	Study	https://ecos.fws.gov/docs/five_year_review/doc6559.pdf	Perform "threats assessment of climate change and sea level rise on breeding, staging, and wintering habitat."	2020
423	Streptocephalus woottoni	Fairy shrimp, riverside	Invertebrate	Arthropod	FWS Region 8: Pacific Southwest	CA	Yes	https://ecos.fws.gov/docs/tess/species_nonpublish/3502.pdf	Listed as a threat	2021	Yes	http://www.gpo.gov/fdsys/pkg/FR-2012-12-04/pdf/2012-28250.pdf	2012 Critical Habitat designation includes climate change considerations.	2012
424	Strymon acis bartrami	Hairstreak, Bartram's	Invertebrate	Arthropod	FWS Region 4: Southeast	FL	Yes	http://www.gpo.gov/fdsys/pkg/FR-2014-08-12/pdf/2014-18611.pdf	Critical habitat rule designates unoccupied upland habitat with restoration potential, explicitly to build resilience to sea-level rise.	2014	Yes	http://www.gpo.gov/fdsys/pkg/FR-2014-08-12/pdf/2014-18611.pdf	Critical habitat rule designates unoccupied upland habitat with restoration potential, explicitly to build resilience to sea-level rise.	2014
425	Stygobromus hayi	Amphipod, Hay's Spring	Invertebrate	Arthropod	FWS Region 5: Northeast	DC, MD	Yes	https://ecos.fws.gov/docs/recovery_plan/Hay_s spring amphipod Recovery Plan final_2022-08-09 signed KH(1).pdf	Recovery plan mentions climate change increasing threats from severe storms/runoff and drought.	2022	No	https://ecos.fws.gov/docs/recovery_plan/Hay_s spring amphipod Recovery Plan final_2022-08-09 signed KH(1).pdf	None of the recovery actions are explicitly climate connected.	2022	Both 2020 documents were a Yes/No
426	Stygobromus pecki	Amphipod, Peck's cave	Invertebrate	Arthropod	FWS Region 2: Southwest	TX	Yes	http://www.gpo.gov/fdsys/pkg/FR-2013-10-23/pdf/2013-24168.pdf	Climate change, particularly drought impacts, are a "special management consideration" in the revised critical habitat designation (2013).	2013	Yes	http://www.gpo.gov/fdsys/pkg/FR-2013-10-23/pdf/2013-24168.pdf	Climate change, particularly drought impacts, are a "special management consideration" in the revised critical habitat designation (2013).	2013
427	Stygoparnus comalensis	Beetle, Comal Springs dryopid	Invertebrate	Arthropod	FWS Region 2: Southwest	TX	Yes	http://www.gpo.gov/fdsys/pkg/FR-2013-10-23/pdf/2013-24168.pdf	Climate change, particularly drought impacts, are a "special management consideration" in the revised critical habitat designation (2013).	2013	Yes	http://www.gpo.gov/fdsys/pkg/FR-2013-10-23/pdf/2013-24168.pdf	Climate change, particularly drought impacts, are a "special management consideration" in the revised critical habitat designation (2013).	2013
428	Sylvilagus bachmani riparius	Rabbit, riparian brush	Vertebrate	Mammal	FWS Region 8: Pacific Southwest	CA	Yes	https://ecos.fws.gov/docs/five_year_review/doc6480.pdf	Climate change listed as a threat	2020	No	https://ecos.fws.gov/docs/five_year_review/doc6480.pdf		2020
429	Sylvilagus palustris hefneri	Rabbit, Lower Keys marsh	Vertebrate	Mammal	FWS Region 4: Southeast	FL	Yes	https://ecos.fws.gov/docs/tess/species_nonpublish/3683.pdf	Sea level rise and increased frequency and intensity of hurricanes	2022	Yes	https://ecos.fws.gov/docs/tess/species_nonpublish/3683.pdf	"Develop a range-wide approach to LKMR habitat restoration and creation, including consideration of creating higher elevation refugia as part of a climate change/sea level rise adaptation strategy. "	2022
430	Syncaris pacifica	Shrimp, California freshwater	Invertebrate	Arthropod	FWS Region 8: Pacific Southwest	CA	Yes	https://ecos.fws.gov/docs/tess/species_nonpublish/3953.pdf	Listed as a threat	2022	No	https://ecos.fws.gov/docs/tess/species_nonpublish/3953.pdf		2022
431	Tamiasciurus hudsonicus grahamensis	Squirrel, Mount Graham red	Vertebrate	Mammal	FWS Region 2: Southwest	AZ	Yes	http://www.fws.gov/southwest/es/arizona/Documents/speciesDocs/MGRS/MGRS_dRecov_Plan_Revision_Final_May2011.pdf	2011 Recovery plan explicitly incorporates climate resilience into recovery goals and objectives.	2011	Yes	http://www.fws.gov/southwest/es/arizona/Documents/speciesDocs/MGRS/MGRS_dRecov_Plan_Revision_Final_May2011.pdf	2011 Recovery plan explicitly incorporates climate resilience into recovery goals and objectives.	2011
432	Tartarocreagris texana	Pseudoscorpion, Tooth Cave	Invertebrate	Arthropod	FWS Region 2: Southwest	TX	Yes	http://ecos.fws.gov/docs/five_year_review/doc3018.pdf	Brief discussion in five-year review (2009) of climate change as a possible threat (not previously identified in recovery plan), due to species' narrow tolerances. No climate related actions or recommendations.	2009	No	https://ecos.fws.gov/docs/recovery_plan/Lower%20Keys%20Marsh%20Rabbit%20Recovery%20Plan%20Amendment_1.pdf		2019
242	Tayshaneta (fmr. Neoleptoneta, Leptoneta) myopica	Spider, Tooth Cave	Invertebrate	Arthropod	FWS Region 2: Southwest	TX	Yes	http://ecos.fws.gov/docs/five_year_review/doc3018.pdf	Brief discussion in five-year review (2009) of climate change as a possible threat (not previously identified in recovery plan), due to species' narrow tolerances. No climate related actions or recommendations.	2009	No	https://ecos.fws.gov/docs/recovery_plan/Final%20RP%20Amendment%20Travis-Williamson%20Karst%20Inverts.pdf		2019	NOTE: Genus seems to have changed to Neoleptoneta, then to Tayshaneta
277	Tayshanete (fmr. Neoleptoneta) microps	Spider, Government Canyon Bat Cave	Invertebrate	Arthropod	FWS Region 2: Southwest	TX	Yes	https://ecos.fws.gov/docs/tess/species_nonpublish/3608.pdf	"The subterranean voids the species occupies, particularly shallower caves, could become uninhabitable due to climatic conditions that exceed the species’ physiological tolerances."	2021	Yes	http://ecos.fws.gov/docs/recovery_plan/Final%202001%20Bexar%20Co%20Invertebrates%20Rec%20Plan_1.pdf	2011 Recovery plan discusses changes to hydrology and above-ground vegetation; Recovery action table says that all of their habitat protection & management and monitoring and research actions are aimed at addressing climate change (though they aren't specific about how.)	2011	Name change to Tayshaneta microps
433	Telespyza cantans	Finch, Laysan	Vertebrate	Bird	FWS Region 1: Pacific	HI	Yes	https://ecos.fws.gov/docs/tess/species_nonpublish/3820.pdf	"Changes in climatic conditions may cause a reduction of prey, loss of habitat, and increase localized catastrophes such as severe storms, diseases, climate change, or demographic stochasticity which, because of the Laysan finches restricted range and low numbers, increases the finches vulnerability to extinction."	2022	Yes	https://ecos.fws.gov/docs/recovery_plan/NWHI_Passerine_Final_Recovery_Plan_Amendment_20190820.pdf	Mentioned in recovery criteria.	2019
434	Telespyza ultima	Finch, Nihoa	Vertebrate	Bird	FWS Region 1: Pacific	HI	Yes	https://ecos.fws.gov/docs/tess/species_nonpublish/3825.pdf	"Changes in climatic conditions may cause a reduction of prey, loss of habitat, and increase localized catastrophes such as severe storms, diseases, climate change, or demographic stochasticity which, because of the Nihoa finches restricted range and low numbers, increases the finches vulnerability to extinction."	2022	Yes	https://ecos.fws.gov/docs/recovery_plan/NWHI_Passerine_Final_Recovery_Plan_Amendment_20190820.pdf	Mentioned in recovery criteria.	2019
435	Texamaurops reddelli	Beetle, Kretschmarr Cave mold	Invertebrate	Arthropod	FWS Region 2: Southwest	TX	Yes	http://ecos.fws.gov/docs/five_year_review/doc3018.pdf	Brief discussion in five-year review (2009) of climate change as a possible threat (not previously identified in recovery plan), due to species' narrow tolerances. No climate related actions or recommendations.	2009	No	https://ecos.fws.gov/docs/recovery_plan/Lower%20Keys%20Marsh%20Rabbit%20Recovery%20Plan%20Amendment_1.pdf		2019
436	Texella cokendolpheri	Harvestman, Cokendolpher Cave	Invertebrate	Arthropod	FWS Region 2: Southwest	TX	Yes	https://ecos.fws.gov/docs/five_year_review/doc6517.pdf	"If surface temperature increases and longer dry periods and reduced soil moisture lead to changes in the climate of the deep cave zones, this could reduce or eliminate available habitat within occupied caves, thus affecting the Cokendolpher cave harvestman."	2020	Yes	http://ecos.fws.gov/docs/recovery_plan/Final%202001%20Bexar%20Co%20Invertebrates%20Rec%20Plan_1.pdf	2011 Recovery plan discusses changes to hydrology and above-ground vegetation; Recovery action table says that all of their habitat protection & management and monitoring and research actions are aimed at addressing climate change (though they aren't specific about how.)	2011
437	Texella reddelli	Harvestman, Bee Creek Cave	Invertebrate	Arthropod	FWS Region 2: Southwest	TX	Yes	http://ecos.fws.gov/docs/five_year_review/doc3015.pdf	2009 Five-year review has general discussion of climate change as a potential threat, but emphasizes uncertainty.	2009	No	https://ecos.fws.gov/docs/recovery_plan/Lower%20Keys%20Marsh%20Rabbit%20Recovery%20Plan%20Amendment_1.pdf		2019
438	Texella reyesi	Harvestman, Bone Cave	Invertebrate	Arthropod	FWS Region 2: Southwest	TX	Yes	(http://ecos.fws.gov/docs/five_year_review/doc3016.pdf	2009 Five-year review has general discussion of climate change as a potential threat, but emphasizes uncertainty.	2009	No	https://ecos.fws.gov/docs/recovery_plan/Lower%20Keys%20Marsh%20Rabbit%20Recovery%20Plan%20Amendment_1.pdf		2019
439	Thamnophis sirtalis tetrataenia	Snake, San Francisco garter	Vertebrate	Reptile	FWS Region 8: Pacific Southwest	CA	Yes	https://ecos.fws.gov/docs/five_year_review/doc6410.pdf	Climate change listed as a threat	2020	No	https://ecos.fws.gov/docs/five_year_review/doc6410.pdf		2020
387	Theliderma (fmr. Quadrula) intermedia	Monkeyface, Cumberland	Invertebrate	Mollusk	FWS Region 4: Southeast	AL, TN, VA	Yes	https://ecos.fws.gov/docs/tess/species_nonpublish/3236.pdf	"The effects of climate change on this species and its host fishes are currently unknown. "	2021	No	https://ecos.fws.gov/docs/tess/species_nonpublish/3236.pdf		2021	Name change to Theliderma intermedia
440	Thermosphaeroma thermophilus	Isopod, Socorro	Invertebrate	Arthropod	FWS Region 2: Southwest	NM	Yes	https://ecos.fws.gov/docs/five_year_review/doc774.pdf	2009 Five-year Review identifies CC as a threat: "The effects of climate change, if they include widespread drought, decreased spring discharge, or a change in water chemistry is a newly recognized threat that could eliminate the species." No climate-specific recommendations or actions.	2009	No	https://ecos.fws.gov/docs/tess/species_nonpublish/3649.pdf		2022
441	Tiaroga cobitis	Loach minnow	Vertebrate	Fish	FWS Region 2: Southwest	AZ, NM	No	https://ecos.fws.gov/docs/recovery_plan/Final%20APG%20Amendment_loach%20minnow_508%20Compliant.pdf		2019	Yes	http://ecos.fws.gov/docs/five_year_review/doc4042.pdf	2012 Five-year review has no narrative on climate change, but does include management action to ensure water supply despite climate change-induced drought.	2012
442	Toxolasma cylindrellus	Lilliput, pale	Invertebrate	Mollusk	FWS Region 4: Southeast	AL, GA, TN	Yes	https://ecos.fws.gov/docs/tess/species_nonpublish/3562.pdf	"Climate change has the potential to increase the vulnerability of the pale lilliput to random catastrophic events, primarily through more intense or frequent droughts."	2021	No	https://ecos.fws.gov/docs/tess/species_nonpublish/3562.pdf		2021
443	Trimerotropis infantilis	Grasshopper, Zayante band-winged	Invertebrate	Arthropod	FWS Region 8: Pacific Southwest	CA	Yes	https://ecos.fws.gov/docs/tess/species_nonpublish/958.pdf	"an increase in temperature, extreme storms, drought, and wildfire will most likely have an overall negative effect on [this] species."	2021	No	https://ecos.fws.gov/docs/tess/species_nonpublish/958.pdf		2021
444	Tryonia alamosae	Springsnail, Alamosa	Invertebrate	Mollusk	FWS Region 2: Southwest	NM	Yes	https://ecos.fws.gov/docs/tess/species_nonpublish/3340.pdf	A potential threat but specifics unknown	2018	Yes	https://ecos.fws.gov/docs/tess/species_nonpublish/3340.pdf	Study and incorporate into recovery goals	2018
445	Tryonia cheatumi	Tryonia, Phantom	Invertebrate	Mollusk	FWS Region 2: Southwest	TX	Yes	http://www.gpo.gov/fdsys/pkg/FR-2013-07-09/pdf/2013-16222.pdf	Discussed as a factor in listing (particularly due to hydrologic impacts)	2013	No	http://www.gpo.gov/fdsys/pkg/FR-2013-07-09/pdf/2013-16230.pdf	not mentioned in critical habitat designation; no other recovery documents available.	2013
446	Tryonia circumstriata	Tryonia, Gonzales	Invertebrate	Mollusk	FWS Region 2: Southwest	TX	Yes	https://ecos.fws.gov/docs/five_year_review/doc6199.pdf		2019	No	https://ecos.fws.gov/docs/five_year_review/doc6199.pdf		2019
447	Tympanuchus cupido attwateri	Prairie-chicken, Attwater's greater	Vertebrate	Bird	FWS Region 2: Southwest	TX	No	https://ecos.fws.gov/docs/tess/species_nonpublish/995.pdf		2021	No	https://ecos.fws.gov/docs/tess/species_nonpublish/995.pdf	Not considering climate change is incredulous, given the devastating impact of Hurricane Harvey (worsened by greater sea surface temperatures) on AGPC, and historic droughts.	2021
472 (2022)	Tympanuchus pallidicinctus	Prairie-chicken, lesser	Vertebrate	Bird	FWS Region 2: Southwest	NM, TX	Yes	https://www.govinfo.gov/content/pkg/FR-2022-11-25/pdf/2022-25214.pdf#page=1	Discussed extensively	2022	N/A	https://www.govinfo.gov/content/pkg/FR-2022-11-25/pdf/2022-25214.pdf#page=1	Listed in lated 2022, no other documents	2022	Refers to Southern DPS, which was listed E (northern DPS is in Threatened file).
449	Vagrans egistina	Mariana wandering butterfly	Invertebrate	Arthropod	FWS Region 1: Pacific	GU, NMI	Yes	https://ecos.fws.gov/docs/recovery_plan/SIGNED%20-%20Mariana%20Islands%20dRP%20(20221129).pdf	Mentioned briefly as one of the threats.	2022	Yes	https://ecos.fws.gov/docs/recovery_plan/SIGNED%20-%20Mariana%20Islands%20dRP%20(20221129).pdf	"While having redundant and resilient populations distributed throughout a species’ range is a hallmark of most recovery criteria, the periodic and extremely destructive potential of typhoons, which will likely increase with climate change, indicates that conservation translocations will be particularly important to the recovery of 23 species." Also mentions modeling and adaptive management.	2022
450	Vetericaris chaceorum	Shrimp, Anchialine pool	Invertebrate	Arthropod	FWS Region 1: Pacific	HI	Yes	https://ecos.fws.gov/docs/recovery_plan/SIGNED%20-%20Hawaii%20Island%20dRP%20(20221108)_1.pdf	Sea level rise may cause complete inundation, exposure to predators and invasive species, and debris blockage/infilling.	2022	Yes	https://ecos.fws.gov/docs/recovery_plan/SIGNED%20-%20Hawaii%20Island%20dRP%20(20221108)_1.pdf	Model pools to identify suitable habitat; consider translocation to new or unoccupied pools.	2022	Both the 2019 Recovery Outline and the 2020 Five-year review were a Yes/Study
452	Villosa fabalis	Bean, rayed	Invertebrate	Mollusk	FWS Region 3: Midwest	IN, MI, NY, OH, PA, VA	Yes	https://ecos.fws.gov/docs/tess/species_nonpublish/2669.pdf	Five-year review mentions climate change a couple of times.	2018	No	https://ecos.fws.gov/docs/tess/species_nonpublish/2669.pdf	No climate actions in Five-year review, no other recovery documents.	2018
453	Villosa perpurpurea	Bean, purple	Invertebrate	Mollusk	FWS Region 5: Northeast	TN, VA	No	https://ecos.fws.gov/docs/five_year_review/doc6580.pdf		2020	No	https://ecos.fws.gov/docs/five_year_review/doc6580.pdf		2020
454	Villosa trabalis	Bean, Cumberland	Invertebrate	Mollusk	FWS Region 4: Southeast	AL, KY, NC, VA	No	https://ecos.fws.gov/docs/five_year_review/doc6374.pdf		2020	No	https://ecos.fws.gov/docs/five_year_review/doc6374.pdf		2020
455	Vireo bellii pusillus	Vireo, least Bell's	Vertebrate	Bird	FWS Region 8: Pacific Southwest	CA	No	http://ecos.fws.gov/docs/five_year_review/doc781.pdf	2006 Five-year review does not mention climate change. Recovery plan is from 1998.	2006	No	http://ecos.fws.gov/docs/five_year_review/doc781.pdf	2006 Five-year review does not mention climate change. Recovery plan is from 1998.	2006
456	Vulpes macrotis mutica	Fox, San Joaquin kit	Vertebrate	Mammal	FWS Region 8: Pacific Southwest	CA	Yes	https://ecos.fws.gov/docs/five_year_review/doc6647.pdf	Climate change mentioned as a threat, referencing the 2010 5-year review	2020	No	https://ecos.fws.gov/docs/five_year_review/doc6647.pdf		2020
465 (2021)	Vulpes vulpes necator	Red fox, Sierra Nevada	Vertebrate	Mammal	FWS Region 8: Pacific Southwest	CA, NV	Yes	https://ecos.fws.gov/docs/recovery_plan/Recovery Outline for the Sierra Nevada Distinct Population Segment of the Sierra Nevada Red Fox.pdf	Climate cange will reduce alpine and subalpine habitat and increase competition from warmer-adapted larger canids.	2021	Yes	https://ecos.fws.gov/docs/recovery_plan/Recovery Outline for the Sierra Nevada Distinct Population Segment of the Sierra Nevada Red Fox.pdf	Research needs include climate topics, outline calls for interventions based on the results.	2021
457	Xyrauchen texanus	Sucker, razorback	Vertebrate	Fish	FWS Region 6: Mountain Prairie	AZ, CO, NV, NM, UT	Yes	https://www.govinfo.gov/content/pkg/FR-2021-07-07/pdf/2021-14335.pdf#page=1	"Climate change is not expected to be a significant stressor in the near term, but the effects could increase in the long term."	2021	N/A (Not a threat)	https://www.govinfo.gov/content/pkg/FR-2021-07-07/pdf/2021-14335.pdf#page=1		2021	Downlisting has not been finalized.
458	Zapus hudsonius luteus	Mouse, New Mexico meadow jumping	Vertebrate	Mammal	FWS Region 2: Southwest	AZ, NM	Yes	https://ecos.fws.gov/docs/recovery_plan/NM Meadow Jumping Mouse_Draft Recovery Plan_2021_508.pdf	Drought, fire and scouring floods all exacerbated by climate change.	2022	Yes	https://ecos.fws.gov/docs/recovery_plan/NM Meadow Jumping Mouse_Draft Recovery Plan_2021_508.pdf	Protect and restore riparian habitat in drought vulnerable areas.	2022
459	Zosterops rotensis	White-eye, Rota bridled	Vertebrate	Bird	FWS Region 1: Pacific	NMI	No	https://ecos.fws.gov/docs/five_year_review/doc6574.pdf		2020	No	https://ecos.fws.gov/docs/recovery_plan/Rota_Bridled_White_Eye_Final_Recovery_Plan_Amendment_20190820.pdf		2019	Both the 2019 recovery plan amendment and the 2020 five-year review were a No/No

## Sheet: Summary
THREAT
Year	Yes	No
1970-2006		9
2007	2	0
2008	1	1
2009	12	0
2010	3	0
2011	5	0
2012	9	0
2013	14	0
2014	10	1
2015	4	1
2016	5	0
2017	5	2
2018	14	4
2019	87	25
2020	63	10
2021	71	10
2022	88	3
TOTAL	393	66	459
ACTION
Year	No discussion	Further Study	Action	Not Applicable
1970-2006	9	0	0	0
2007	2	0	0	0
2008	1	1	0	0
2009	2	1	2	0
2010	1	0	4	0
2011	0	0	9	0
2012	2	0	9	1
2013	5	3	9	0
2014	1	2	6	2
2015	2	1	8	0
2016	2	1	3	0
2017	5	1	0	0
2018	9	2	6	0
2019	82	8	32	3
2020	43	4	8	0
2021	45	5	29	2
2022	27	7	46	6
	238	36	171	14	459

## Sheet: Listing change
	Scientific_Name	CC_Discuss	Discuss_Level	Date	Common_Name	Taxon	Subtaxon	Lead_Region	State	Threat	Threat_source	Threat_note	Threat_year	Action	Action_source	Action_note	Action_year	Comments
48-Downlisted	Branta sandvicensis	No	No discussion	2011	Goose, Hawaiian	Vertebrate	Bird	FWS Region 1: Pacific	HI	Yes	https://www.govinfo.gov/content/pkg/FR-2019-12-19/pdf/2019-26548.pdf#page=1	Downlisting rule mentions drought, hurricanes and stochastic events as ongoing threats with climate change.	2019	Action	https://www.govinfo.gov/content/pkg/FR-2019-12-19/pdf/2019-26548.pdf#page=1	"The nene recovery plan is rooted in adaptive management, and as the species needs become evident in light of climate change, we will adapt accordingly. We are aware that data indicate an increase in frequency and intensity of both drought and hurricanes, and indicate species range shifts due to a warming ambient global temperature, and we will work with partners to do our best to minimize such i…	2019	Species has been downlisted to Threatened and is now in our T species analysis.
68-Downlisted	Chasmistes liorus	No	No discussion	1999	Sucker, June	Vertebrate	Fish	FWS Region 6: Mountain Prairie	UT	Yes	https://www.govinfo.gov/content/pkg/FR-2021-01-04/pdf/2020-27833.pdf#page=1	Downlisting final rule mentions that climate change is a new threat not discussed at time of listing.	2021	Yes	https://www.govinfo.gov/content/pkg/FR-2021-01-04/pdf/2020-27833.pdf#page=1	Final rule for downlisting discusses that changes to reservoir flows and additional water acquisitions may be necessary.	2021	Species was proposed for downlisting to Threatened in 2019 and finalized in 1/4/2021
420-Delisted	Sterna antillarum	Yes	No discussion	2013	Tern, least	Vertebrate	Bird	FWS Region 4: Southeast	AL, AR, AZ, CA, CO, CT, DE, FL, GA, IA, IL, IN, KS, KY, LA, MA, MD, ME, MO, MS, MT, NC, ND, NE, NH, NJ, NM, NY, OH, OK, RI, SC, SD, TN, TX, VA	Yes	https://www.govinfo.gov/content/pkg/FR-2021-01-13/pdf/2020-28192.pdf#page=1	Delisting rule discusses the possibility of extreme storm events and damage and fragmentation to habitat, but mentions the bird's wide range, mobility and long lifespan as mitigating factors. Calls the threat "not significant to the Interior least tern now or within the foreseeable future."	2021	No threat, no action needed	https://www.govinfo.gov/content/pkg/FR-2021-01-13/pdf/2020-28192.pdf#page=1	Concludes climate change is "Not a significant threat."	2021	Species was proposed for delisting in 2019 and finalized in 1/13/2021
53-Delisted	Buteo solitarius	No	No discussion	2014	Hawk, Hawaiian	Vertebrate	Bird	FWS Region 1: Pacific	HI	Yes	https://www.govinfo.gov/content/pkg/FR-2020-01-02/pdf/2019-27339.pdf#page=1	Delisting rule says: "We expect that the Hawaiian hawk’s susceptibility to climate change effects is low into the foreseeable future given the range and diversity of habitats occupied by the species, the adaptability of the species, and its resistance to bird diseases such as avian malaria and avian pox virus. The species’ resistance to bird diseases is important because studies show that the ran…	2020	No threat, no action needed	https://www.govinfo.gov/content/pkg/FR-2020-01-02/pdf/2019-27339.pdf#page=1	"We do not consider effects related to climate change to be a substantial threat to the species at this time, and we do not expect climate change effects to rise to the magnitude or severity such that the species will be likely to become an endangered species within the foreseeable future."	2020	Proposed for delisting in 2018, finalized Jan 2020
102-Delisted	Dendroica kirtlandii	Yes	Study	2012	Warbler, Kirtland's	Vertebrate	Bird	FWS Region 3: Midwest	FL, MI, SC, WI	Yes	https://www.govinfo.gov/content/pkg/FR-2019-10-09/pdf/2019-22096.pdf#page=1	Delisting rule evaluates effect of climate change on both breeding and wintering grounds. Emphasizes uncertainty in models however.	2019	Study	https://www.govinfo.gov/content/pkg/FR-2019-10-09/pdf/2019-22096.pdf#page=1	Recommends monitoring to detect climate change effects/responses.	2019	Name change- Setophaga. Delisting proposed in 2018 and finalized in 2019.
189-Delisted	Gila boraxobius	No	No discussion	2012	Chub, Borax Lake	Vertebrate	Fish	FWS Region 1: Pacific	OR	Yes	https://www.govinfo.gov/content/pkg/FR-2020-06-11/pdf/2020-10861.pdf#page=1	In the delisting decision, climate change is discussed in detail, in response to comments; was assessed using models to 2049.	2020	No threat, no action needed	https://www.govinfo.gov/content/pkg/FR-2020-06-11/pdf/2020-10861.pdf#page=1	Delisting decision considers climate change to be a potential future threat, but not one now. "Although there are no currently available climate projections on the persistence of springs into the future, changes to precipitation, drought, aquifer recharge, or vegetative community around Borax Lake as a result of climate change would not likely have an impact on the Borax Lake chub."	2020	Proposed for delisting in 2019, finalized June 2020
418-Delisted	Sphaerodactylus micropithecus	Yes	No threat, no action needed	2016	Gecko, Monito	Vertebrate	Reptile	FWS Region 4: Southeast	PR	Yes	https://www.govinfo.gov/content/pkg/FR-2019-10-03/pdf/2019-20907.pdf#page=1	Proposed rule evaluated the effects of SLR (species lives at higher elevation); final rule also assessed hurricane intensity and drought.	2019	No threat, no action needed	https://www.govinfo.gov/content/pkg/FR-2019-10-03/pdf/2019-20907.pdf#page=1	"We continue to conclude that climate change does not constitute a threat to the species to the extent that it is endangered or threatened throughout all or a significant portion of its range"	2019	Delisting proposed in 2018 and finalized in 2019.
190-Downlisted	Gila cypha	No	Action	2011	Chub, humpback	Vertebrate	Fish	FWS Region 6: Mountain Prairie	AZ, CO, UT	Yes	https://www.govinfo.gov/content/pkg/FR-2020-01-22/pdf/2020-00512.pdf#page=1	Downlisting proposed rule describes possible impacts to river flows	2020	Yes			2011	Downlisting proposal July 2021; takes effect November 17, 2021
76- Delisted 2022	Cicurina venii	Yes	Action	2011	Meshweaver, Braken Bat Cave	Invertebrate	Arthropod	FWS Region 2: Southwest	TX	Yes			2011	Yes			2011
309- Delisted 2021	Oxyloma haydeni kanabensis	Yes	No discussion	2011	Ambersnail, Kanab	Invertebrate	Mollusk	FWS Region 2: Southwest	AZ									Delisted 6/24/2021 as "not a listable entity"
205-Downlisted	Helminthoglypta walkeriana	No	No discussion	2006	Snail, Morro shoulderband	Invertebrate	Mollusk	FWS Region 8: Pacific Southwest	CA	No	https://ecos.fws.gov/docs/recovery_plan/Morro%20Shoulderband%20clarification.pdf		2019	No	https://ecos.fws.gov/docs/recovery_plan/Morro%20Shoulderband%20clarification.pdf		2019	Downlisted feb 23, 2022 https://www.fws.gov/species/morro-shoulderband-helminthoglypta-walkeriana
196 (Delisted, then proposed threatened	Glaucidium brasilianum cactorum	No	No discussion	2008	Pygmy-owl, cactus ferruginous	Vertebrate	Bird	FWS Region 2: Southwest	AZ	No			2008	No			2008
283 (Downlisted)	Nicrophorus americanus	Yes	No discussion	2008	Beetle, American burying	Invertebrate	Arthropod	FWS Region 2: Southwest	AR, KS, MA, MO, NE, OH, OK, RI, SD, TX	Yes	https://www.govinfo.gov/content/pkg/FR-2020-10-15/pdf/2020-19810.pdf#page=1	Downlisting rule talks about climate quite a bit, including which populations are most threatened	2020	Yes	https://www.govinfo.gov/content/pkg/FR-2020-10-15/pdf/2020-19810.pdf#page=1	Climate change seems to be a factor in the 4(d) rule.	2020	Downlisted to threatened in 2020
110 (Downlisted)	Dipodomys stephensi	Kangaroo rat, Stephens'	Vertebrate	Mammal	FWS Region 8: Pacific Southwest	CA				Yes	https://www.govinfo.gov/content/pkg/FR-2022-02-17/pdf/2022-03317.pdf#page=1	"Minimal threat," "Appears to be resilient"	2022	No threat, no action needed	https://www.govinfo.gov/content/pkg/FR-2022-02-17/pdf/2022-03317.pdf#page=1		2000	Downlisted to threatened in 2022
460 (2019 Listing)	Fundulus julisia			2019-11-20	Barrens topminnow	Southeast Region	Fish	FWS Region 4: Southeast	TN	Yes	https://ecos.fws.gov/docs/recovery_plan/20191119%20final%20BTM%20recov%20outline.pdf		2019	Yes	https://ecos.fws.gov/docs/recovery_plan/20191119%20final%20BTM%20recov%20outline.pdf		2019
462 (2020 Listing)	Pekania pennanti			2020-06-17	Fisher, Sierra Nevada		Mammal	FWS Region 8: Pacific Southwest	CA	Yes	https://www.govinfo.gov/content/pkg/FR-2021-10-19/pdf/2021-22449.pdf#page=1	CH designation mentions climate change as a threat.	2021	Yes	https://www.govinfo.gov/content/pkg/FR-2021-10-19/pdf/2021-22449.pdf#page=1	Special management consideration in critical habitat	2021
461 (2020 Listing)	Euchloe ausonides insulanus			2020-05-22	Island Marble Butterfly Recovery Outline	Pacific Region	Insect	FWS Region 1: Pacific	WA	Yes	https://ecos.fws.gov/docs/recovery_plan/Draft_Island_Marble_Butterfly_Recovery_Plan_20220606.pdf	Mentions SLR and storm surge driven by cliamte change.	2022	Study	https://ecos.fws.gov/docs/recovery_plan/Draft_Island_Marble_Butterfly_Recovery_Plan_20220606.pdf	Conduct research on the effects of climate change.	2022
464 (2021 Listing)	Noturus furiosus			2021-07-09	Carolina Madtom					Yes	https://www.govinfo.gov/content/pkg/FR-2021-06-09/pdf/2021-11600.pdf#page=1	Section on climate change in the listing decision.	2021	Yes	https://www.govinfo.gov/content/pkg/FR-2021-06-09/pdf/2021-11600.pdf#page=1	Critical habitat designation mentions that threats will be exacerbated by climate change.	2021	There is also a 2021 Recovery Outline, which mentions climate change once as a threat and has no actions.
463 (2021)	Cryptobranchus alleganiensis alleganiensis									Yes	https://ecos.fws.gov/docs/recovery_plan/Final Recovery Outline-Eastern Hellbender MO DPS 3-24-21_signed.pdf	Brief mention of climate change exacerbating flooding and drought.	2021	No	https://ecos.fws.gov/docs/recovery_plan/Final Recovery Outline-Eastern Hellbender MO DPS 3-24-21_signed.pdf		2021
465 (2021)	Vulpes vulpes necator									Yes	https://ecos.fws.gov/docs/recovery_plan/Recovery Outline for the Sierra Nevada Distinct Population Segment of the Sierra Nevada Red Fox.pdf	Climate cange will reduce alpine and subalpine habitat and increase competition from warmer-adapted larger canids.	2021	Yes	https://ecos.fws.gov/docs/recovery_plan/Recovery Outline for the Sierra Nevada Distinct Population Segment of the Sierra Nevada Red Fox.pdf	Research needs include climate topics, outline calls for interventions based on the results.	2021
466 (2021)	Bombus franklini									Yes	https://ecos.fws.gov/docs/recovery_plan/Recovery_Outline_for_Franklins_Bumblebee_20211217.pdf	"Secondary threat" that may lead to decreased food availability.	2021	No	https://ecos.fws.gov/docs/recovery_plan/Recovery_Outline_for_Franklins_Bumblebee_20211217.pdf	No climate actions in the recovery outline	2021
467 (2021)	Cambarus cracens									No	https://www.govinfo.gov/content/pkg/FR-2021-09-08/pdf/2021-19093.pdf#page=1	A few very general climate mentions in the SSA, not discussed in listing decision.	2021	No	https://ecos.fws.gov/docs/recovery_plan/Slenderclaw%20Crayfish%20Recovery%20Outline.pdf	Not mentioned in recovery outline.	2021
468 (2022)	Macrhybopsis tetranema									Yes	https://www.govinfo.gov/content/pkg/FR-2022-02-28/pdf/2022-03703.pdf#page=1	Listing decision: climate change may be exacerbating habitat fragmentation.	2022	Study	https://ecos.fws.gov/docs/recovery_plan/Peppered Chub Recovery Outline.pdf	Climate change effect on stream flow is an information gap.	2022
469 (2022)	Pleurobema athearni									Yes	https://www.govinfo.gov/content/pkg/FR-2022-07-06/pdf/2022-14312.pdf#page=1	Risk factor in the critical habitat designation.	2022	No	https://www.govinfo.gov/content/pkg/FR-2022-07-06/pdf/2022-14312.pdf#page=1	No discussion in the designation itself.	2022
470 (2022)	Myotis septentrionalis									Yes	https://www.govinfo.gov/content/pkg/FR-2022-11-30/pdf/2022-25998.pdf#page=1	"Although a changing climate may provide some benefit to the northern long-eared bat, overall negative impacts are anticipated, especially at local levels." (WNS is by far the main threat however.)	2022	N/A	https://www.govinfo.gov/content/pkg/FR-2022-11-30/pdf/2022-25998.pdf#page=1	No actions in a listing decision.	2022	This is an uplisting from T to E. Add to appropriate file.
471 (2022)	Anaxyrus williamsi									Yes	https://www.govinfo.gov/content/pkg/FR-2022-12-02/pdf/2022-26237.pdf#page=1	Detailed discussion in listing decision	2022	N/A	https://ecos.fws.gov/ecp/species/10635	Very recent listing, no other documents.	2022
472 (2022)	Tympanuchus pallidicinctus									Yes	https://www.govinfo.gov/content/pkg/FR-2022-11-25/pdf/2022-25214.pdf#page=1	Discussed extensively	2022	N/A	https://www.govinfo.gov/content/pkg/FR-2022-11-25/pdf/2022-25214.pdf#page=1	Listed in lated 2022, no other documents	2022	Refers to Southern DPS, which was listed E (northern DPS is in Threatened file).
Proposed E listings:
	Planorbella magnifica	Ramshorn, magnificent	Wherever found	Region 4	Proposed Endangered	Proposed	Federal Register (2022/08/18)	Download	742.6 acres
	Tamias minimus atristriatus	Chipmunk, Penasco least	Wherever found	Region 2	Proposed Endangered	Proposed	Federal Register (2021/09/28)
	Lampsilis bergmanni	Fatmucket, Guadalupe		Region 2	Proposed Endangered	Proposed	Federal Register (2021/08/26)	Download	425.8 acres									Myotis septentrionalis
	Lampsilis bracteata	Fatmucket, Texas	Wherever found	Region 2	Proposed Endangered	Proposed	Federal Register (2021/08/26)	Download	6353.1 acres									Anaxyrus williamsi
	Cyclonaias necki	Orb, Guadalupe		Region 2	Proposed Endangered	Proposed	Federal Register (2021/08/26)	Download	2341.1 acres
	Cyclonaias petrina	pimpleback, Texas	Wherever found	Region 2	Proposed Endangered	Proposed	Federal Register (2021/08/26)	Download	3933.8 acres
	Fusconaia mitchelli	Spike, false	Wherever found	Region 2	Proposed Endangered	Proposed	Federal Register (2021/08/26)	Download	2609.9 acres
