# Supplementary material for: Climate Assessment of US Endangered Species Improves, Actions Still Lag
Source: Research Square preprint supplement (doi:10.21203/rs.3.rs-2869805/v1), 2023-06-14
Supplement: Supplementary file 2 [file 27b65b38d59d2b782f05ac0e.xlsx]

## Sheet: Delach_et_al_2019_sensitivity_d
Species ID	Scientific_Name	Common_Name	Taxon	Subtaxon	Lead_Region	State	Q_n	Question	Explanation	Source	Factor	Sensitive	Comment
1	Accipiter striatus venator	Hawk, Puerto Rican sharp-shinned	Vertebrate	Bird	FWS Region 4: Southeast	PR	1	Does the species have specialized thermal tolerance (e.g. pika, trout) or depend on habitat with an important temperature threshold (e.g. sea ice)?			Temperature	No
1	Accipiter striatus venator	Hawk, Puerto Rican sharp-shinned	Vertebrate	Bird	FWS Region 4: Southeast	PR	2	Is the species dependent on habitat with specialized hydrology pattern (e.g. wetland, vernal pool, seasonal streams; sensitivity to drought)?	Delannoy (1992) reported that broad-winged hawks were observed to be clustered in the north-central part of the forest within the subtropical wet forest and subtropical rain forest life zones, where the tabonuco is the dominant forest type._x000D_	recovery plan (http://ecos.fws.gov/docs/recovery_plan/970908.pdf)	Hydrology	Yes
1	Accipiter striatus venator	Hawk, Puerto Rican sharp-shinned	Vertebrate	Bird	FWS Region 4: Southeast	PR	3	Is the species or its habitat sensitive to or dependent upon a certain disturbance regime (e.g. old growth forest, fire-adapted system; seasonal floods)?	Species is currently threatened by mortality and habitat destruction from hurricanes._x000D_	recovery plan (http://ecos.fws.gov/docs/recovery_plan/970908.pdf)	Disturbance	Yes
1	Accipiter striatus venator	Hawk, Puerto Rican sharp-shinned	Vertebrate	Bird	FWS Region 4: Southeast	PR	4	Is the species or its habitat geographically restricted or confined by natural and/or anthropogenic barriers (e.g. mountain range, isolated soil type, coastal zone or island, or hemmed in by urban development)?	Endemic to the island of Puerto Rico, are currently restricted to montane forests along the Cordillera Central, Sierra de Cayey, and Sierra de Luquillo.	recovery plan (http://ecos.fws.gov/docs/recovery_plan/970908.pdf)	Isolation	Yes
1	Accipiter striatus venator	Hawk, Puerto Rican sharp-shinned	Vertebrate	Bird	FWS Region 4: Southeast	PR	5	Is the species or its habitat threatened by the spread of invasive or “out of balance” species (e.g. weed, forest pest, novel disease)?	The Puerto Rican sharp-shinned hawk is also affected by warble fly parasitism._x000D_	recovery plan (http://ecos.fws.gov/docs/recovery_plan/970908.pdf)	Injurious species	Yes
1	Accipiter striatus venator	Hawk, Puerto Rican sharp-shinned	Vertebrate	Bird	FWS Region 4: Southeast	PR	6	Is the species sensitive to changes in chemical concentration (e.g. elevated atmospheric CO2, change in water pH, or dissolved oxygen tolerance)?			Chemistry	No
1	Accipiter striatus venator	Hawk, Puerto Rican sharp-shinned	Vertebrate	Bird	FWS Region 4: Southeast	PR	7	Does the species rely on particular triggers for life cycle events (breeding, migration, color change) that are likely to become out of sync with seasonal changes in resource availability or environmental conditions (phenologic mismatch)?			Phenology	No
1	Accipiter striatus venator	Hawk, Puerto Rican sharp-shinned	Vertebrate	Bird	FWS Region 4: Southeast	PR	8	Is the species is dependent on one or a few other species (e.g. host, pollinator, dominant food item) and may have limited alternatives if the required species declines due to climate change?			Obligate relationships	No
2	Achatinella mustelina	Snail, Oahu tree	Invertebrate	Mollusk	FWS Region 1: Pacific	HI	1	Does the species have specialized thermal tolerance (e.g. pika, trout) or depend on habitat with an important temperature threshold (e.g. sea ice)?	Juvenile mortality was much higher during hot dry summer months than during the wet and cooler winter months (Hadfield et al. 1993) This increase in mortality is attributed to desiccation due to increased temperature (>21ºC) and reduced precipitation (<5 cm per month) during summer months.	five-year review (http://ecos.fws.gov/docs/five_year_review/doc3903.pdf)	Temperature	Yes
2	Achatinella mustelina	Snail, Oahu tree	Invertebrate	Mollusk	FWS Region 1: Pacific	HI	2	Is the species dependent on habitat with specialized hydrology pattern (e.g. wetland, vernal pool, seasonal streams; sensitivity to drought)?	Juvenile mortality was much higher during hot dry summer months than during the wet and cooler winter months (Hadfield et al. 1993) This increase in mortality is attributed to desiccation due to increased temperature (>21ºC) and reduced precipitation (<5 cm per month) during summer months.	five-year review (http://ecos.fws.gov/docs/five_year_review/doc3903.pdf)	Hydrology	Yes
2	Achatinella mustelina	Snail, Oahu tree	Invertebrate	Mollusk	FWS Region 1: Pacific	HI	3	Is the species or its habitat sensitive to or dependent upon a certain disturbance regime (e.g. old growth forest, fire-adapted system; seasonal floods)?	Sensitive to both hurricanes and to fire.	five-year review (http://ecos.fws.gov/docs/five_year_review/doc3903.pdf)	Disturbance	Yes
2	Achatinella mustelina	Snail, Oahu tree	Invertebrate	Mollusk	FWS Region 1: Pacific	HI	4	Is the species or its habitat geographically restricted or confined by natural and/or anthropogenic barriers (e.g. mountain range, isolated soil type, coastal zone or island, or hemmed in by urban development)?	Island endemic confined to one mountain range. Further fine-scale fragmentation has occurred.	five-year review (http://ecos.fws.gov/docs/five_year_review/doc3903.pdf)	Isolation	Yes
2	Achatinella mustelina	Snail, Oahu tree	Invertebrate	Mollusk	FWS Region 1: Pacific	HI	5	Is the species or its habitat threatened by the spread of invasive or “out of balance” species (e.g. weed, forest pest, novel disease)?			Injurious species	No
2	Achatinella mustelina	Snail, Oahu tree	Invertebrate	Mollusk	FWS Region 1: Pacific	HI	6	Is the species sensitive to changes in chemical concentration (e.g. elevated atmospheric CO2, change in water pH, or dissolved oxygen tolerance)?			Chemistry	No
2	Achatinella mustelina	Snail, Oahu tree	Invertebrate	Mollusk	FWS Region 1: Pacific	HI	7	Does the species rely on particular triggers for life cycle events (breeding, migration, color change) that are likely to become out of sync with seasonal changes in resource availability or environmental conditions (phenologic mismatch)?			Phenology	No
2	Achatinella mustelina	Snail, Oahu tree	Invertebrate	Mollusk	FWS Region 1: Pacific	HI	8	Is the species is dependent on one or a few other species (e.g. host, pollinator, dominant food item) and may have limited alternatives if the required species declines due to climate change?	Unclear. They appear to use multiple tree species. Feed on fungus; whether of one or many species was not specified.	five-year review (http://ecos.fws.gov/docs/five_year_review/doc3903.pdf)	Obligate relationships	No
3	Acipenser brevirostrum	Sturgeon, shortnose	Vertebrate	Fish	NMFS: Marine	DE, FL, GA, ME, MD, MA, NJ, NY, NC, PA, RI, SC, VA	1	Does the species have specialized thermal tolerance (e.g. pika, trout) or depend on habitat with an important temperature threshold (e.g. sea ice)?	Species is sensitive to warm water temperatures and tends to avoid lower portions of river (and salt water areas) during hot summer months. As sea level rises and temperatures rise the portion of the river with suitable cool water refuges may shrink. Warm summer temperatures (above 28oC) may severely limit available juvenile rearing habitat in some southern rivers. _x000D_ In summer, juvenile hab…	NatureServe, FWS recovery plan (http://www.nmfs.noaa.gov/pr/pdfs/recovery/sturgeon_shortnose.pdf)	Temperature	Yes
3	Acipenser brevirostrum	Sturgeon, shortnose	Vertebrate	Fish	NMFS: Marine	DE, FL, GA, ME, MD, MA, NJ, NY, NC, PA, RI, SC, VA	2	Is the species dependent on habitat with specialized hydrology pattern (e.g. wetland, vernal pool, seasonal streams; sensitivity to drought)?	Species appears to be able to use salt and freshwater, but seeks out upper reaches of river habitat and access to freshwater springs in southern streams during hot months. Overuse of these springs or drought conditions may reduce availability of this thermal refuge	FWS recovery plan (http://www.nmfs.noaa.gov/pr/pdfs/recovery/sturgeon_shortnose.pdf)	Hydrology	Yes
3	Acipenser brevirostrum	Sturgeon, shortnose	Vertebrate	Fish	NMFS: Marine	DE, FL, GA, ME, MD, MA, NJ, NY, NC, PA, RI, SC, VA	3	Is the species or its habitat sensitive to or dependent upon a certain disturbance regime (e.g. old growth forest, fire-adapted system; seasonal floods)?	Species is sensitive to disturbance in river flow.	FWS recovery plan (http://www.nmfs.noaa.gov/pr/pdfs/recovery/sturgeon_shortnose.pdf)	Disturbance	Yes
3	Acipenser brevirostrum	Sturgeon, shortnose	Vertebrate	Fish	NMFS: Marine	DE, FL, GA, ME, MD, MA, NJ, NY, NC, PA, RI, SC, VA	4	Is the species or its habitat geographically restricted or confined by natural and/or anthropogenic barriers (e.g. mountain range, isolated soil type, coastal zone or island, or hemmed in by urban development)?	Species has been restricted in its annual upriver breeding migration in past due to damming.	FWS recovery plan (http://www.nmfs.noaa.gov/pr/pdfs/recovery/sturgeon_shortnose.pdf)	Isolation	Yes
3	Acipenser brevirostrum	Sturgeon, shortnose	Vertebrate	Fish	NMFS: Marine	DE, FL, GA, ME, MD, MA, NJ, NY, NC, PA, RI, SC, VA	5	Is the species or its habitat threatened by the spread of invasive or “out of balance” species (e.g. weed, forest pest, novel disease)?			Injurious species	No
3	Acipenser brevirostrum	Sturgeon, shortnose	Vertebrate	Fish	NMFS: Marine	DE, FL, GA, ME, MD, MA, NJ, NY, NC, PA, RI, SC, VA	6	Is the species sensitive to changes in chemical concentration (e.g. elevated atmospheric CO2, change in water pH, or dissolved oxygen tolerance)?	Sensitive to changes in dissolved oxygen concentrations, especially when water temperature rises. May be less tolerant of low dissolved oxygen levels in high ambient water temperatures and show signs of stress in water temperatures higher than 28oC . At these temperatures, concomitant low levels of dissolved oxygen may be lethal.	NatureServe	Chemistry	Yes
3	Acipenser brevirostrum	Sturgeon, shortnose	Vertebrate	Fish	NMFS: Marine	DE, FL, GA, ME, MD, MA, NJ, NY, NC, PA, RI, SC, VA	7	Does the species rely on particular triggers for life cycle events (breeding, migration, color change) that are likely to become out of sync with seasonal changes in resource availability or environmental conditions (phenologic mismatch)?	Species tends to migrate upstream for spawning based on a certain spring temp (8 degrees C), but also tries to avoid times of high flow. If spring temperatures rise and cue the species to migrate while spring flow is high, this could ve detrimental to the energy reserves of individuals.	FWS recovery plan (http://www.nmfs.noaa.gov/pr/pdfs/recovery/sturgeon_shortnose.pdf)	Phenology	Yes
3	Acipenser brevirostrum	Sturgeon, shortnose	Vertebrate	Fish	NMFS: Marine	DE, FL, GA, ME, MD, MA, NJ, NY, NC, PA, RI, SC, VA	8	Is the species is dependent on one or a few other species (e.g. host, pollinator, dominant food item) and may have limited alternatives if the required species declines due to climate change?			Obligate relationships	No
3	Acipenser oxyrinchus oxirinchus	Sturgeon, Atlantic	Vertebrate	Fish	NMFS: Marine	CT, DC , DE, FL, GA, MA, MD, ME, NC, NH, NJ, NY, PA, RI, SC, VA	1	Does the species have specialized thermal tolerance (e.g. pika, trout) or depend on habitat with an important temperature threshold (e.g. sea ice)?	They spawn in moderately flowing water (46-76 cm/s) in deep parts of large rivers. Sturgeon eggs are highly adhesive and are deposited on bottom substrate, usually on hard surfaces (e.g., cobble). It is likely that cold, clean water is important for proper larval development.	NMFs fact sheet (http://www.nmfs.noaa.gov/pr/species/fish/atlanticsturgeon.htm)	Temperature	Yes
4	Acipenser oxyrinchus oxirinchus	Sturgeon, Atlantic	Vertebrate	Fish	NMFS: Marine	CT, DC , DE, FL, GA, MA, MD, ME, NC, NH, NJ, NY, PA, RI, SC, VA	2	Is the species dependent on habitat with specialized hydrology pattern (e.g. wetland, vernal pool, seasonal streams; sensitivity to drought)?	Needs interplay of freshwater river system and estuary habitat.	listing petition (http://www.nmfs.noaa.gov/pr/pdfs/species/petition_atlanticsturgeon_nrdc.pdf)	Hydrology	Yes
4	Acipenser oxyrinchus oxirinchus	Sturgeon, Atlantic	Vertebrate	Fish	NMFS: Marine	CT, DC , DE, FL, GA, MA, MD, ME, NC, NH, NJ, NY, PA, RI, SC, VA	3	Is the species or its habitat sensitive to or dependent upon a certain disturbance regime (e.g. old growth forest, fire-adapted system; seasonal floods)?			Disturbance	No
4	Acipenser oxyrinchus oxirinchus	Sturgeon, Atlantic	Vertebrate	Fish	NMFS: Marine	CT, DC , DE, FL, GA, MA, MD, ME, NC, NH, NJ, NY, PA, RI, SC, VA	4	Is the species or its habitat geographically restricted or confined by natural and/or anthropogenic barriers (e.g. mountain range, isolated soil type, coastal zone or island, or hemmed in by urban development)?			Isolation	No
4	Acipenser oxyrinchus oxirinchus	Sturgeon, Atlantic	Vertebrate	Fish	NMFS: Marine	CT, DC , DE, FL, GA, MA, MD, ME, NC, NH, NJ, NY, PA, RI, SC, VA	5	Is the species or its habitat threatened by the spread of invasive or “out of balance” species (e.g. weed, forest pest, novel disease)?			Injurious species	No
4	Acipenser oxyrinchus oxirinchus	Sturgeon, Atlantic	Vertebrate	Fish	NMFS: Marine	CT, DC , DE, FL, GA, MA, MD, ME, NC, NH, NJ, NY, PA, RI, SC, VA	6	Is the species sensitive to changes in chemical concentration (e.g. elevated atmospheric CO2, change in water pH, or dissolved oxygen tolerance)?	Sensitive to hypoxia.	listing petition (http://www.nmfs.noaa.gov/pr/pdfs/species/petition_atlanticsturgeon_nrdc.pdf)	Chemistry	Yes
4	Acipenser oxyrinchus oxirinchus	Sturgeon, Atlantic	Vertebrate	Fish	NMFS: Marine	CT, DC , DE, FL, GA, MA, MD, ME, NC, NH, NJ, NY, PA, RI, SC, VA	7	Does the species rely on particular triggers for life cycle events (breeding, migration, color change) that are likely to become out of sync with seasonal changes in resource availability or environmental conditions (phenologic mismatch)?			Phenology	No
4	Acipenser oxyrinchus oxirinchus	Sturgeon, Atlantic	Vertebrate	Fish	NMFS: Marine	CT, DC , DE, FL, GA, MA, MD, ME, NC, NH, NJ, NY, PA, RI, SC, VA	8	Is the species is dependent on one or a few other species (e.g. host, pollinator, dominant food item) and may have limited alternatives if the required species declines due to climate change?			Obligate relationships	No
5	Acipenser transmontanus	Sturgeon, white	Vertebrate	Fish	FWS Region 1: Pacific	AK, AZ, CA, ID, MT, OR, WA	1	Does the species have specialized thermal tolerance (e.g. pika, trout) or depend on habitat with an important temperature threshold (e.g. sea ice)?			Temperature	No
5	Acipenser transmontanus	Sturgeon, white	Vertebrate	Fish	FWS Region 1: Pacific	AK, AZ, CA, ID, MT, OR, WA	2	Is the species dependent on habitat with specialized hydrology pattern (e.g. wetland, vernal pool, seasonal streams; sensitivity to drought)?			Hydrology	No
5	Acipenser transmontanus	Sturgeon, white	Vertebrate	Fish	FWS Region 1: Pacific	AK, AZ, CA, ID, MT, OR, WA	3	Is the species or its habitat sensitive to or dependent upon a certain disturbance regime (e.g. old growth forest, fire-adapted system; seasonal floods)?			Disturbance	No
5	Acipenser transmontanus	Sturgeon, white	Vertebrate	Fish	FWS Region 1: Pacific	AK, AZ, CA, ID, MT, OR, WA	4	Is the species or its habitat geographically restricted or confined by natural and/or anthropogenic barriers (e.g. mountain range, isolated soil type, coastal zone or island, or hemmed in by urban development)?	"White sturgeons have been detrimentally impacted by physical and ecological barriers and population fragmentation caused by dams and their impoundments."	NatureServe	Isolation	Yes
5	Acipenser transmontanus	Sturgeon, white	Vertebrate	Fish	FWS Region 1: Pacific	AK, AZ, CA, ID, MT, OR, WA	5	Is the species or its habitat threatened by the spread of invasive or “out of balance” species (e.g. weed, forest pest, novel disease)?			Injurious species	No
5	Acipenser transmontanus	Sturgeon, white	Vertebrate	Fish	FWS Region 1: Pacific	AK, AZ, CA, ID, MT, OR, WA	6	Is the species sensitive to changes in chemical concentration (e.g. elevated atmospheric CO2, change in water pH, or dissolved oxygen tolerance)?			Chemistry	No
5	Acipenser transmontanus	Sturgeon, white	Vertebrate	Fish	FWS Region 1: Pacific	AK, AZ, CA, ID, MT, OR, WA	7	Does the species rely on particular triggers for life cycle events (breeding, migration, color change) that are likely to become out of sync with seasonal changes in resource availability or environmental conditions (phenologic mismatch)?			Phenology	No
5	Acipenser transmontanus	Sturgeon, white	Vertebrate	Fish	FWS Region 1: Pacific	AK, AZ, CA, ID, MT, OR, WA	8	Is the species is dependent on one or a few other species (e.g. host, pollinator, dominant food item) and may have limited alternatives if the required species declines due to climate change?			Obligate relationships	No
6	Acrocephalus familiaris kingi	Millerbird, Nihoa	Vertebrate	Bird	FWS Region 1: Pacific	HI	1	Does the species have specialized thermal tolerance (e.g. pika, trout) or depend on habitat with an important temperature threshold (e.g. sea ice)?			Temperature	No
6	Acrocephalus familiaris kingi	Millerbird, Nihoa	Vertebrate	Bird	FWS Region 1: Pacific	HI	2	Is the species dependent on habitat with specialized hydrology pattern (e.g. wetland, vernal pool, seasonal streams; sensitivity to drought)?			Hydrology	No
6	Acrocephalus familiaris kingi	Millerbird, Nihoa	Vertebrate	Bird	FWS Region 1: Pacific	HI	3	Is the species or its habitat sensitive to or dependent upon a certain disturbance regime (e.g. old growth forest, fire-adapted system; seasonal floods)?	Potential threat - "a severe tropical storm or tidal wave could decimate the small population (Matthews and Moseley 1990)."	Natureserve	Disturbance	Yes
6	Acrocephalus familiaris kingi	Millerbird, Nihoa	Vertebrate	Bird	FWS Region 1: Pacific	HI	4	Is the species or its habitat geographically restricted or confined by natural and/or anthropogenic barriers (e.g. mountain range, isolated soil type, coastal zone or island, or hemmed in by urban development)?	"Resident endemic of Nihoa Island, northwestern Hawaiian Islands; total area of island is 63 hectares (Morin et al. 1997). . . Suitable habitat on Nihoa makes up 32-40.5 hectares (Morin et al. 1997)."	Natureserve	Isolation	Yes
6	Acrocephalus familiaris kingi	Millerbird, Nihoa	Vertebrate	Bird	FWS Region 1: Pacific	HI	5	Is the species or its habitat threatened by the spread of invasive or “out of balance” species (e.g. weed, forest pest, novel disease)?	"Potential threats include predators such as rats (should they be introduced) and competitors such as ants, avian diseases that could be brought in by migrating birds." But this is not a current pressure.	Natureserve	Injurious species	No
6	Acrocephalus familiaris kingi	Millerbird, Nihoa	Vertebrate	Bird	FWS Region 1: Pacific	HI	6	Is the species sensitive to changes in chemical concentration (e.g. elevated atmospheric CO2, change in water pH, or dissolved oxygen tolerance)?			Chemistry	No
6	Acrocephalus familiaris kingi	Millerbird, Nihoa	Vertebrate	Bird	FWS Region 1: Pacific	HI	7	Does the species rely on particular triggers for life cycle events (breeding, migration, color change) that are likely to become out of sync with seasonal changes in resource availability or environmental conditions (phenologic mismatch)?			Phenology	No
6	Acrocephalus familiaris kingi	Millerbird, Nihoa	Vertebrate	Bird	FWS Region 1: Pacific	HI	8	Is the species is dependent on one or a few other species (e.g. host, pollinator, dominant food item) and may have limited alternatives if the required species declines due to climate change?			Obligate relationships	No
7	Acrocephalus luscinia	Warbler, nightingale reed	Vertebrate	Bird	FWS Region 1: Pacific	NMI	1	Does the species have specialized thermal tolerance (e.g. pika, trout) or depend on habitat with an important temperature threshold (e.g. sea ice)?			Temperature	No
7	Acrocephalus luscinia	Warbler, nightingale reed	Vertebrate	Bird	FWS Region 1: Pacific	NMI	2	Is the species dependent on habitat with specialized hydrology pattern (e.g. wetland, vernal pool, seasonal streams; sensitivity to drought)?			Hydrology	No
7	Acrocephalus luscinia	Warbler, nightingale reed	Vertebrate	Bird	FWS Region 1: Pacific	NMI	3	Is the species or its habitat sensitive to or dependent upon a certain disturbance regime (e.g. old growth forest, fire-adapted system; seasonal floods)?	Upland and wetland habitat threatened by fire.	five-year review (http://ecos.fws.gov/docs/five_year_review/doc3251.pdf)	Disturbance	No
7	Acrocephalus luscinia	Warbler, nightingale reed	Vertebrate	Bird	FWS Region 1: Pacific	NMI	4	Is the species or its habitat geographically restricted or confined by natural and/or anthropogenic barriers (e.g. mountain range, isolated soil type, coastal zone or island, or hemmed in by urban development)?	Species restricted to the islands of Guam (now extinct there), Saipan, and Alamagan.	five-year review (http://ecos.fws.gov/docs/five_year_review/doc3251.pdf)	Isolation	Yes
7	Acrocephalus luscinia	Warbler, nightingale reed	Vertebrate	Bird	FWS Region 1: Pacific	NMI	5	Is the species or its habitat threatened by the spread of invasive or “out of balance” species (e.g. weed, forest pest, novel disease)?	Species' wetland habitat threatened by invasive introduced plants and predation by cats, rats, etc., as well as diseases like West Nile Virus and avian influenza.	five-year review (http://ecos.fws.gov/docs/five_year_review/doc3251.pdf)	Injurious species	Yes
7	Acrocephalus luscinia	Warbler, nightingale reed	Vertebrate	Bird	FWS Region 1: Pacific	NMI	6	Is the species sensitive to changes in chemical concentration (e.g. elevated atmospheric CO2, change in water pH, or dissolved oxygen tolerance)?			Chemistry	No
7	Acrocephalus luscinia	Warbler, nightingale reed	Vertebrate	Bird	FWS Region 1: Pacific	NMI	7	Does the species rely on particular triggers for life cycle events (breeding, migration, color change) that are likely to become out of sync with seasonal changes in resource availability or environmental conditions (phenologic mismatch)?			Phenology	No
7	Acrocephalus luscinia	Warbler, nightingale reed	Vertebrate	Bird	FWS Region 1: Pacific	NMI	8	Is the species is dependent on one or a few other species (e.g. host, pollinator, dominant food item) and may have limited alternatives if the required species declines due to climate change?			Obligate relationships	No
8	Adelocosa anops	Spider, Kauai cave wolf or pe'e pe'e maka 'ole	Invertebrate	Arthropod	FWS Region 1: Pacific	HI	1	Does the species have specialized thermal tolerance (e.g. pika, trout) or depend on habitat with an important temperature threshold (e.g. sea ice)?			Temperature	No
8	Adelocosa anops	Spider, Kauai cave wolf or pe'e pe'e maka 'ole	Invertebrate	Arthropod	FWS Region 1: Pacific	HI	2	Is the species dependent on habitat with specialized hydrology pattern (e.g. wetland, vernal pool, seasonal streams; sensitivity to drought)?	"All of the caves may be threatened by prolonged drought, brought about either by global climatic changes or by local alteration of the vegetation that may reduce rainfall or otherwise result in reduced soil moisture content. Prolonged drought may desiccate the cave interior, making it less accommodating to cave-dwelling animals." _x000D_ (Howarth 1983).	recovery plan (http://www.fws.gov/pacific/ecoservices/endangered/recovery/documents/kauaicavewolfspider.pdf)	Hydrology	Yes
8	Adelocosa anops	Spider, Kauai cave wolf or pe'e pe'e maka 'ole	Invertebrate	Arthropod	FWS Region 1: Pacific	HI	3	Is the species or its habitat sensitive to or dependent upon a certain disturbance regime (e.g. old growth forest, fire-adapted system; seasonal floods)?			Disturbance	No
8	Adelocosa anops	Spider, Kauai cave wolf or pe'e pe'e maka 'ole	Invertebrate	Arthropod	FWS Region 1: Pacific	HI	4	Is the species or its habitat geographically restricted or confined by natural and/or anthropogenic barriers (e.g. mountain range, isolated soil type, coastal zone or island, or hemmed in by urban development)?	"Suitable habitat currently occupies less than 7.5 square kilometers (2000 acres)" on the island of Kauai. Development now surrounds both inhabited caves.	Natureserve	Isolation	Yes
8	Adelocosa anops	Spider, Kauai cave wolf or pe'e pe'e maka 'ole	Invertebrate	Arthropod	FWS Region 1: Pacific	HI	5	Is the species or its habitat threatened by the spread of invasive or “out of balance” species (e.g. weed, forest pest, novel disease)?	"There is good evidence to suggest that Adelocasa anops is preyed upon by the non-native brown violin spider which also feeds on resident arthropods that otherwise serve as prey for the Kauai cave wolf spider. The introduced lesser brown scorpion (Isometrus maculatus) and centipedes (Scolopendra spp.) are also a concern."	recovery plan (http://www.fws.gov/pacific/ecoservices/endangered/recovery/documents/kauaicavewolfspider.pdf)	Injurious species	Yes
8	Adelocosa anops	Spider, Kauai cave wolf or pe'e pe'e maka 'ole	Invertebrate	Arthropod	FWS Region 1: Pacific	HI	6	Is the species sensitive to changes in chemical concentration (e.g. elevated atmospheric CO2, change in water pH, or dissolved oxygen tolerance)?			Chemistry	No
8	Adelocosa anops	Spider, Kauai cave wolf or pe'e pe'e maka 'ole	Invertebrate	Arthropod	FWS Region 1: Pacific	HI	7	Does the species rely on particular triggers for life cycle events (breeding, migration, color change) that are likely to become out of sync with seasonal changes in resource availability or environmental conditions (phenologic mismatch)?			Phenology	No
8	Adelocosa anops	Spider, Kauai cave wolf or pe'e pe'e maka 'ole	Invertebrate	Arthropod	FWS Region 1: Pacific	HI	8	Is the species is dependent on one or a few other species (e.g. host, pollinator, dominant food item) and may have limited alternatives if the required species declines due to climate change?			Obligate relationships	No
9	Aerodramus vanikorensis bartschi	Swiftlet, Mariana gray	Vertebrate	Bird	FWS Region 1: Pacific	GU, NMI	1	Does the species have specialized thermal tolerance (e.g. pika, trout) or depend on habitat with an important temperature threshold (e.g. sea ice)?			Temperature	No
9	Aerodramus vanikorensis bartschi	Swiftlet, Mariana gray	Vertebrate	Bird	FWS Region 1: Pacific	GU, NMI	2	Is the species dependent on habitat with specialized hydrology pattern (e.g. wetland, vernal pool, seasonal streams; sensitivity to drought)?			Hydrology	No
9	Aerodramus vanikorensis bartschi	Swiftlet, Mariana gray	Vertebrate	Bird	FWS Region 1: Pacific	GU, NMI	3	Is the species or its habitat sensitive to or dependent upon a certain disturbance regime (e.g. old growth forest, fire-adapted system; seasonal floods)?			Disturbance	No
9	Aerodramus vanikorensis bartschi	Swiftlet, Mariana gray	Vertebrate	Bird	FWS Region 1: Pacific	GU, NMI	4	Is the species or its habitat geographically restricted or confined by natural and/or anthropogenic barriers (e.g. mountain range, isolated soil type, coastal zone or island, or hemmed in by urban development)?	"Currently, chachaguak populations are known only to occur on the islands of Guam, Aguiguan, and Saipan."	five-year review (http://ecos.fws.gov/docs/five_year_review/doc3352.pdf)	Isolation	Yes
9	Aerodramus vanikorensis bartschi	Swiftlet, Mariana gray	Vertebrate	Bird	FWS Region 1: Pacific	GU, NMI	5	Is the species or its habitat threatened by the spread of invasive or “out of balance” species (e.g. weed, forest pest, novel disease)?	The brown treesnake, monitor lizards and feral cats "may prey on chachaguak opportunistically on all of the islands. The black drongo (Dicrurus macrocercus), a bird species introduced to Guam and Rota, was also observed preying on chachaguak on Guam (Perez 1968) and may have been a factor in their extirpation on Rota. Cockroaches and Mud-dauber wasps also decrease nesting success."	five-year review (http://ecos.fws.gov/docs/five_year_review/doc3352.pdf)	Injurious species	Yes
9	Aerodramus vanikorensis bartschi	Swiftlet, Mariana gray	Vertebrate	Bird	FWS Region 1: Pacific	GU, NMI	6	Is the species sensitive to changes in chemical concentration (e.g. elevated atmospheric CO2, change in water pH, or dissolved oxygen tolerance)?			Chemistry	No
9	Aerodramus vanikorensis bartschi	Swiftlet, Mariana gray	Vertebrate	Bird	FWS Region 1: Pacific	GU, NMI	7	Does the species rely on particular triggers for life cycle events (breeding, migration, color change) that are likely to become out of sync with seasonal changes in resource availability or environmental conditions (phenologic mismatch)?			Phenology	No
9	Aerodramus vanikorensis bartschi	Swiftlet, Mariana gray	Vertebrate	Bird	FWS Region 1: Pacific	GU, NMI	8	Is the species is dependent on one or a few other species (e.g. host, pollinator, dominant food item) and may have limited alternatives if the required species declines due to climate change?			Obligate relationships	No
10	Agelaius xanthomus	Blackbird, yellow-shouldered	Vertebrate	Bird	FWS Region 4: Southeast	PR	1	Does the species have specialized thermal tolerance (e.g. pika, trout) or depend on habitat with an important temperature threshold (e.g. sea ice)?			Temperature	No
10	Agelaius xanthomus	Blackbird, yellow-shouldered	Vertebrate	Bird	FWS Region 4: Southeast	PR	2	Is the species dependent on habitat with specialized hydrology pattern (e.g. wetland, vernal pool, seasonal streams; sensitivity to drought)?			Hydrology	No
10	Agelaius xanthomus	Blackbird, yellow-shouldered	Vertebrate	Bird	FWS Region 4: Southeast	PR	3	Is the species or its habitat sensitive to or dependent upon a certain disturbance regime (e.g. old growth forest, fire-adapted system; seasonal floods)?			Disturbance	No
10	Agelaius xanthomus	Blackbird, yellow-shouldered	Vertebrate	Bird	FWS Region 4: Southeast	PR	4	Is the species or its habitat geographically restricted or confined by natural and/or anthropogenic barriers (e.g. mountain range, isolated soil type, coastal zone or island, or hemmed in by urban development)?	"The species is primarily limited to . . . Mona and Monito islands . . and three populations in eastern, southern, and southwestern Puerto _x000D_ Rico."	five-year review (http://ecos.fws.gov/docs/five_year_review/doc3603.pdf)	Isolation	Yes
10	Agelaius xanthomus	Blackbird, yellow-shouldered	Vertebrate	Bird	FWS Region 4: Southeast	PR	5	Is the species or its habitat threatened by the spread of invasive or “out of balance” species (e.g. weed, forest pest, novel disease)?	"Avian pox was identified in the revised recovery plan as a potential problem for the mariquita (USFWS 1996). Mariquitas infected with avian pox had significantly lower survival rate than uninfected birds (USFWS 1996). Also, inclement weather has been implicated in nest failure and mortality of mariquitas (Reitsma 1999)."	five-year review (http://ecos.fws.gov/docs/five_year_review/doc3603.pdf)	Injurious species	Yes
10	Agelaius xanthomus	Blackbird, yellow-shouldered	Vertebrate	Bird	FWS Region 4: Southeast	PR	6	Is the species sensitive to changes in chemical concentration (e.g. elevated atmospheric CO2, change in water pH, or dissolved oxygen tolerance)?			Chemistry	No
10	Agelaius xanthomus	Blackbird, yellow-shouldered	Vertebrate	Bird	FWS Region 4: Southeast	PR	7	Does the species rely on particular triggers for life cycle events (breeding, migration, color change) that are likely to become out of sync with seasonal changes in resource availability or environmental conditions (phenologic mismatch)?			Phenology	No
10	Agelaius xanthomus	Blackbird, yellow-shouldered	Vertebrate	Bird	FWS Region 4: Southeast	PR	8	Is the species is dependent on one or a few other species (e.g. host, pollinator, dominant food item) and may have limited alternatives if the required species declines due to climate change?			Obligate relationships	No
11	Alasmidonta atropurpurea	Elktoe, Cumberland	Invertebrate	Mollusk	FWS Region 4: Southeast	KY, TN	1	Does the species have specialized thermal tolerance (e.g. pika, trout) or depend on habitat with an important temperature threshold (e.g. sea ice)?	Species are sensitive to increased water temperatures caused by decreases in water quality and quantity. Reproduction is also highly tied to temperatures (both high and low).	species recovery plan (http://ecos.fws.gov/docs/recovery_plan/040524.pdf)	Temperature	Yes
11	Alasmidonta atropurpurea	Elktoe, Cumberland	Invertebrate	Mollusk	FWS Region 4: Southeast	KY, TN	2	Is the species dependent on habitat with specialized hydrology pattern (e.g. wetland, vernal pool, seasonal streams; sensitivity to drought)?	Water withdrawals and drought are likely to be a problem for the species leading to habitat degradation.	species recovery plan (http://ecos.fws.gov/docs/recovery_plan/040524.pdf)	Hydrology	Yes
11	Alasmidonta atropurpurea	Elktoe, Cumberland	Invertebrate	Mollusk	FWS Region 4: Southeast	KY, TN	3	Is the species or its habitat sensitive to or dependent upon a certain disturbance regime (e.g. old growth forest, fire-adapted system; seasonal floods)?	Species is highly sensitive to turbidity (suggesting increased storms and flooding, particularly at times of year when water quality is critical -- i.e. reproductive periods) could be detrimental to the species. Disruption on natural water flow and impoundments are also very problematic.	species recovery plan (http://ecos.fws.gov/docs/recovery_plan/040524.pdf)	Disturbance	Yes
11	Alasmidonta atropurpurea	Elktoe, Cumberland	Invertebrate	Mollusk	FWS Region 4: Southeast	KY, TN	4	Is the species or its habitat geographically restricted or confined by natural and/or anthropogenic barriers (e.g. mountain range, isolated soil type, coastal zone or island, or hemmed in by urban development)?	An endemic of the Cumberland River, original range was "one of the most restricted of any Cumberlandian species." the species now exists in severely isolated and fragmented habitat in a very restricted remaining portion of its range due to habitat loss.	species recovery plan (http://ecos.fws.gov/docs/recovery_plan/040524.pdf)	Isolation	Yes
11	Alasmidonta atropurpurea	Elktoe, Cumberland	Invertebrate	Mollusk	FWS Region 4: Southeast	KY, TN	5	Is the species or its habitat threatened by the spread of invasive or “out of balance” species (e.g. weed, forest pest, novel disease)?			Injurious species	No
11	Alasmidonta atropurpurea	Elktoe, Cumberland	Invertebrate	Mollusk	FWS Region 4: Southeast	KY, TN	6	Is the species sensitive to changes in chemical concentration (e.g. elevated atmospheric CO2, change in water pH, or dissolved oxygen tolerance)?	Species is sensitive to changes in dissolved oxygen resulting from changes in water flow, quantity, quality, etc	species recovery plan (http://ecos.fws.gov/docs/recovery_plan/040524.pdf)	Chemistry	Yes
11	Alasmidonta atropurpurea	Elktoe, Cumberland	Invertebrate	Mollusk	FWS Region 4: Southeast	KY, TN	7	Does the species rely on particular triggers for life cycle events (breeding, migration, color change) that are likely to become out of sync with seasonal changes in resource availability or environmental conditions (phenologic mismatch)?	Species relies on temperature triggers for breeding (both in winter and spring), but its unclear if these would become out of sync with other seasonal changes.	species recovery plan (http://ecos.fws.gov/docs/recovery_plan/040524.pdf)	Phenology	No
11	Alasmidonta atropurpurea	Elktoe, Cumberland	Invertebrate	Mollusk	FWS Region 4: Southeast	KY, TN	8	Is the species is dependent on one or a few other species (e.g. host, pollinator, dominant food item) and may have limited alternatives if the required species declines due to climate change?			Obligate relationships	No
12	Alasmidonta heterodon	Mussel, dwarf wedge	Invertebrate	Mollusk	FWS Region 5: Northeast	CT, MD, MA, NH, NJ, NY, NC, PA, VT, VA	1	Does the species have specialized thermal tolerance (e.g. pika, trout) or depend on habitat with an important temperature threshold (e.g. sea ice)?			Temperature	No
12	Alasmidonta heterodon	Mussel, dwarf wedge	Invertebrate	Mollusk	FWS Region 5: Northeast	CT, MD, MA, NH, NJ, NY, NC, PA, VT, VA	2	Is the species dependent on habitat with specialized hydrology pattern (e.g. wetland, vernal pool, seasonal streams; sensitivity to drought)?	"Apparently, this species is relatively sensitive to pollution, siltation, low dissolved oxygen and is limited to flowing water conditions only (McLain and Ross, 2005)."	NatureServe	Hydrology	Yes
12	Alasmidonta heterodon	Mussel, dwarf wedge	Invertebrate	Mollusk	FWS Region 5: Northeast	CT, MD, MA, NH, NJ, NY, NC, PA, VT, VA	3	Is the species or its habitat sensitive to or dependent upon a certain disturbance regime (e.g. old growth forest, fire-adapted system; seasonal floods)?	Flooding can result in habitat loss.	FWS five-year review (http://ecos.fws.gov/docs/five_year_review/doc1098.pdf)	Disturbance	Yes
12	Alasmidonta heterodon	Mussel, dwarf wedge	Invertebrate	Mollusk	FWS Region 5: Northeast	CT, MD, MA, NH, NJ, NY, NC, PA, VT, VA	4	Is the species or its habitat geographically restricted or confined by natural and/or anthropogenic barriers (e.g. mountain range, isolated soil type, coastal zone or island, or hemmed in by urban development)?	Species' current range is severely restricted from former range (only occupies 20-25% of former range) due to significant habitat loss. Original range much larger.	FWS five-year review (http://ecos.fws.gov/docs/five_year_review/doc1098.pdf)	Isolation	No
12	Alasmidonta heterodon	Mussel, dwarf wedge	Invertebrate	Mollusk	FWS Region 5: Northeast	CT, MD, MA, NH, NJ, NY, NC, PA, VT, VA	5	Is the species or its habitat threatened by the spread of invasive or “out of balance” species (e.g. weed, forest pest, novel disease)?	Species may be threatened by spread of invasive bivalves such as zebra mussel who may benefit from warming temperatures in their northern range (and continue to expand).	NatureServe	Injurious species	Yes
12	Alasmidonta heterodon	Mussel, dwarf wedge	Invertebrate	Mollusk	FWS Region 5: Northeast	CT, MD, MA, NH, NJ, NY, NC, PA, VT, VA	6	Is the species sensitive to changes in chemical concentration (e.g. elevated atmospheric CO2, change in water pH, or dissolved oxygen tolerance)?	Apparently, this species is relatively sensitive to pollution, siltation, low dissolved oxygen" (McLain and Ross, 2005).	NatureServe	Chemistry	Yes
12	Alasmidonta heterodon	Mussel, dwarf wedge	Invertebrate	Mollusk	FWS Region 5: Northeast	CT, MD, MA, NH, NJ, NY, NC, PA, VT, VA	7	Does the species rely on particular triggers for life cycle events (breeding, migration, color change) that are likely to become out of sync with seasonal changes in resource availability or environmental conditions (phenologic mismatch)?			Phenology	No
12	Alasmidonta heterodon	Mussel, dwarf wedge	Invertebrate	Mollusk	FWS Region 5: Northeast	CT, MD, MA, NH, NJ, NY, NC, PA, VT, VA	8	Is the species is dependent on one or a few other species (e.g. host, pollinator, dominant food item) and may have limited alternatives if the required species declines due to climate change?	Species is dependent on about four glochial host species but prefers the tessellated darter.	NatureServe	Obligate relationships	Yes
13	Alasmidonta raveneliana	Elktoe, Appalachian	Invertebrate	Mollusk	FWS Region 4: Southeast	NC, TN	1	Does the species have specialized thermal tolerance (e.g. pika, trout) or depend on habitat with an important temperature threshold (e.g. sea ice)?	Elevated water temperatures may be a problem for the species.	FWS five-year review (http://ecos.fws.gov/docs/five_year_review/doc2369.pdf)	Temperature	Yes
13	Alasmidonta raveneliana	Elktoe, Appalachian	Invertebrate	Mollusk	FWS Region 4: Southeast	NC, TN	2	Is the species dependent on habitat with specialized hydrology pattern (e.g. wetland, vernal pool, seasonal streams; sensitivity to drought)?	Species habitat is sensitive to drought and changes in flow; chemical pollution becomes more of a problem with increasing levels of drought as chemicals become more concentrated and more toxic	FWS five-year review (http://ecos.fws.gov/docs/five_year_review/doc2369.pdf)	Hydrology	Yes
13	Alasmidonta raveneliana	Elktoe, Appalachian	Invertebrate	Mollusk	FWS Region 4: Southeast	NC, TN	3	Is the species or its habitat sensitive to or dependent upon a certain disturbance regime (e.g. old growth forest, fire-adapted system; seasonal floods)?	Species is sensitive to land and stream disturbances that result in erosion and storm water run-off. Disease may also be a problem for the species.	NatureServe; FWS five-year review (http://ecos.fws.gov/docs/five_year_review/doc2369.pdf)	Disturbance	Yes
13	Alasmidonta raveneliana	Elktoe, Appalachian	Invertebrate	Mollusk	FWS Region 4: Southeast	NC, TN	4	Is the species or its habitat geographically restricted or confined by natural and/or anthropogenic barriers (e.g. mountain range, isolated soil type, coastal zone or island, or hemmed in by urban development)?	Species is restricted to scattered pockets of suitable habitat and has been extirpated from much of its former range, which was much larger.	NatureServe	Isolation	No
13	Alasmidonta raveneliana	Elktoe, Appalachian	Invertebrate	Mollusk	FWS Region 4: Southeast	NC, TN	5	Is the species or its habitat threatened by the spread of invasive or “out of balance” species (e.g. weed, forest pest, novel disease)?			Injurious species	No
13	Alasmidonta raveneliana	Elktoe, Appalachian	Invertebrate	Mollusk	FWS Region 4: Southeast	NC, TN	6	Is the species sensitive to changes in chemical concentration (e.g. elevated atmospheric CO2, change in water pH, or dissolved oxygen tolerance)?	Species requires well oxygenated water, and is sensitive to water quality.	FWS five-year review (http://ecos.fws.gov/docs/five_year_review/doc2369.pdf)	Chemistry	Yes
13	Alasmidonta raveneliana	Elktoe, Appalachian	Invertebrate	Mollusk	FWS Region 4: Southeast	NC, TN	7	Does the species rely on particular triggers for life cycle events (breeding, migration, color change) that are likely to become out of sync with seasonal changes in resource availability or environmental conditions (phenologic mismatch)?			Phenology	No
13	Alasmidonta raveneliana	Elktoe, Appalachian	Invertebrate	Mollusk	FWS Region 4: Southeast	NC, TN	8	Is the species is dependent on one or a few other species (e.g. host, pollinator, dominant food item) and may have limited alternatives if the required species declines due to climate change?	Only one species listed as host.	NatureServe	Obligate relationships	Yes
14	Amazona vittata	Parrot, Puerto Rican	Vertebrate	Bird	FWS Region 4: Southeast	PR	1	Does the species have specialized thermal tolerance (e.g. pika, trout) or depend on habitat with an important temperature threshold (e.g. sea ice)?			Temperature	No
14	Amazona vittata	Parrot, Puerto Rican	Vertebrate	Bird	FWS Region 4: Southeast	PR	2	Is the species dependent on habitat with specialized hydrology pattern (e.g. wetland, vernal pool, seasonal streams; sensitivity to drought)?			Hydrology	No
14	Amazona vittata	Parrot, Puerto Rican	Vertebrate	Bird	FWS Region 4: Southeast	PR	3	Is the species or its habitat sensitive to or dependent upon a certain disturbance regime (e.g. old growth forest, fire-adapted system; seasonal floods)?	Weather/hurricans can adversely affect the parrot. Rain limits the adequacy of nesting cavities as chicks and eggs can be lost due to rainwater entering nest cavities and chicks can suffer from respiratory diseases acquired in the dampened nest environment.	five-year review (http://ecos.fws.gov/docs/five_year_review/doc1989.pdf)	Disturbance	Yes
14	Amazona vittata	Parrot, Puerto Rican	Vertebrate	Bird	FWS Region 4: Southeast	PR	4	Is the species or its habitat geographically restricted or confined by natural and/or anthropogenic barriers (e.g. mountain range, isolated soil type, coastal zone or island, or hemmed in by urban development)?	A wild population of about 25-28 individuals survives in the El Yunque National Forest in the Luquillo Mountains.	five-year reviews (http://ecos.fws.gov/docs/five_year_review/doc1989.pdf)	Isolation	Yes
14	Amazona vittata	Parrot, Puerto Rican	Vertebrate	Bird	FWS Region 4: Southeast	PR	5	Is the species or its habitat threatened by the spread of invasive or “out of balance” species (e.g. weed, forest pest, novel disease)?	The black rat and honey bee are known to affect nesting success, not a likely climate nexus.	five-year reviews (http://ecos.fws.gov/docs/five_year_review/doc1989.pdf)	Injurious species	No
14	Amazona vittata	Parrot, Puerto Rican	Vertebrate	Bird	FWS Region 4: Southeast	PR	6	Is the species sensitive to changes in chemical concentration (e.g. elevated atmospheric CO2, change in water pH, or dissolved oxygen tolerance)?			Chemistry	No
14	Amazona vittata	Parrot, Puerto Rican	Vertebrate	Bird	FWS Region 4: Southeast	PR	7	Does the species rely on particular triggers for life cycle events (breeding, migration, color change) that are likely to become out of sync with seasonal changes in resource availability or environmental conditions (phenologic mismatch)?			Phenology	No
14	Amazona vittata	Parrot, Puerto Rican	Vertebrate	Bird	FWS Region 4: Southeast	PR	8	Is the species is dependent on one or a few other species (e.g. host, pollinator, dominant food item) and may have limited alternatives if the required species declines due to climate change?			Obligate relationships	No
15	Amblema neislerii	Three-ridge (mussel), fat	Invertebrate	Mollusk	FWS Region 4: Southeast	FL, GA	1	Does the species have specialized thermal tolerance (e.g. pika, trout) or depend on habitat with an important temperature threshold (e.g. sea ice)?	Species is sensitive to temperature fluctuations.	NatureServe	Temperature	Yes
15	Amblema neislerii	Three-ridge (mussel), fat	Invertebrate	Mollusk	FWS Region 4: Southeast	FL, GA	2	Is the species dependent on habitat with specialized hydrology pattern (e.g. wetland, vernal pool, seasonal streams; sensitivity to drought)?	Species is extremely sensitive to changes in flow, turbidity and other aspects of water quality. Changes in flow could easily be caused by drought or flooding.	NatureServe	Hydrology	Yes
15	Amblema neislerii	Three-ridge (mussel), fat	Invertebrate	Mollusk	FWS Region 4: Southeast	FL, GA	3	Is the species or its habitat sensitive to or dependent upon a certain disturbance regime (e.g. old growth forest, fire-adapted system; seasonal floods)?			Disturbance	No
15	Amblema neislerii	Three-ridge (mussel), fat	Invertebrate	Mollusk	FWS Region 4: Southeast	FL, GA	4	Is the species or its habitat geographically restricted or confined by natural and/or anthropogenic barriers (e.g. mountain range, isolated soil type, coastal zone or island, or hemmed in by urban development)?	Endemic to the Apalachicola River system and severely limited in distribution due to habitat loss. Occurs in isolated, restricted locations and range extent is less than 1000 sq km Original range was much larger.	NatureServe	Isolation	No
15	Amblema neislerii	Three-ridge (mussel), fat	Invertebrate	Mollusk	FWS Region 4: Southeast	FL, GA	5	Is the species or its habitat threatened by the spread of invasive or “out of balance” species (e.g. weed, forest pest, novel disease)?			Injurious species	No
15	Amblema neislerii	Three-ridge (mussel), fat	Invertebrate	Mollusk	FWS Region 4: Southeast	FL, GA	6	Is the species sensitive to changes in chemical concentration (e.g. elevated atmospheric CO2, change in water pH, or dissolved oxygen tolerance)?	Species requires high oxygen levels and is sensitive to changes resulting from loss of water quality.	NatureServe	Chemistry	Yes
15	Amblema neislerii	Three-ridge (mussel), fat	Invertebrate	Mollusk	FWS Region 4: Southeast	FL, GA	7	Does the species rely on particular triggers for life cycle events (breeding, migration, color change) that are likely to become out of sync with seasonal changes in resource availability or environmental conditions (phenologic mismatch)?			Phenology	No
15	Amblema neislerii	Three-ridge (mussel), fat	Invertebrate	Mollusk	FWS Region 4: Southeast	FL, GA	8	Is the species is dependent on one or a few other species (e.g. host, pollinator, dominant food item) and may have limited alternatives if the required species declines due to climate change?	Species is dependent on host species.	NatureServe	Obligate relationships	Yes
16	Ambystoma bishopi	Salamander, flatwoods reticulated	Vertebrate	Amphibian	FWS Region 4: Southeast	FL, GA	1	Does the species have specialized thermal tolerance (e.g. pika, trout) or depend on habitat with an important temperature threshold (e.g. sea ice)?			Temperature	No
16	Ambystoma bishopi	Salamander, flatwoods reticulated	Vertebrate	Amphibian	FWS Region 4: Southeast	FL, GA	2	Is the species dependent on habitat with specialized hydrology pattern (e.g. wetland, vernal pool, seasonal streams; sensitivity to drought)?	Requires small, fishless ephemeral wetlands for egg laying. Drought and increasing likelihood of drought in the future is a significant problem for the species. Reproductive success is strongly tied to hydroperiod.	FWS listing decision (http://ecos.fws.gov/docs/five_year_review/doc2591.pdf)	Hydrology	Yes
16	Ambystoma bishopi	Salamander, flatwoods reticulated	Vertebrate	Amphibian	FWS Region 4: Southeast	FL, GA	3	Is the species or its habitat sensitive to or dependent upon a certain disturbance regime (e.g. old growth forest, fire-adapted system; seasonal floods)?	Species has preference for fire-adapted long-leaf pine habitat. Fire suppression has caused habitat deterioration. Soil disturbance is a problem for the understory plant species in the salamanders habitat. Ranavirus and chytrid fungus has been found to be a problem in similar species, but not this one.	FWS listing decision (http://ecos.fws.gov/docs/five_year_review/doc2591.pdf)	Disturbance	Yes
16	Ambystoma bishopi	Salamander, flatwoods reticulated	Vertebrate	Amphibian	FWS Region 4: Southeast	FL, GA	4	Is the species or its habitat geographically restricted or confined by natural and/or anthropogenic barriers (e.g. mountain range, isolated soil type, coastal zone or island, or hemmed in by urban development)?	Species has been confined to 18% of its original range due to habitat loss and human development. Human development and roads has significantly constrained habitat connectivity.	FWS listing decision (http://ecos.fws.gov/docs/five_year_review/doc2591.pdf)	Isolation	Yes
16	Ambystoma bishopi	Salamander, flatwoods reticulated	Vertebrate	Amphibian	FWS Region 4: Southeast	FL, GA	5	Is the species or its habitat threatened by the spread of invasive or “out of balance” species (e.g. weed, forest pest, novel disease)?	"Cogongrass (Imperata cylindrica), threaten to further degrade existing flatwoods habitat. Cogongrass, a perennial grass native to Southeast Asia, is one of the leading threats to the ecological integrity of native herbaceous flora, including that in the longleaf pine ecosystem (Jose et al. 2002, p. 43). Especially threatening to the reticulated flatwoods salamander is the ability of cogongrass t…	FWS listing decision (http://ecos.fws.gov/docs/five_year_review/doc2591.pdf)	Injurious species	Yes
16	Ambystoma bishopi	Salamander, flatwoods reticulated	Vertebrate	Amphibian	FWS Region 4: Southeast	FL, GA	6	Is the species sensitive to changes in chemical concentration (e.g. elevated atmospheric CO2, change in water pH, or dissolved oxygen tolerance)?			Chemistry	No
16	Ambystoma bishopi	Salamander, flatwoods reticulated	Vertebrate	Amphibian	FWS Region 4: Southeast	FL, GA	7	Does the species rely on particular triggers for life cycle events (breeding, migration, color change) that are likely to become out of sync with seasonal changes in resource availability or environmental conditions (phenologic mismatch)?			Phenology	No
16	Ambystoma bishopi	Salamander, flatwoods reticulated	Vertebrate	Amphibian	FWS Region 4: Southeast	FL, GA	8	Is the species is dependent on one or a few other species (e.g. host, pollinator, dominant food item) and may have limited alternatives if the required species declines due to climate change?			Obligate relationships	No
17	Ambystoma californiense	Salamander, California tiger	Vertebrate	Amphibian	FWS Region 8: Pacific Southwest	CA	1	Does the species have specialized thermal tolerance (e.g. pika, trout) or depend on habitat with an important temperature threshold (e.g. sea ice)?			Temperature	No
17	Ambystoma californiense	Salamander, California tiger	Vertebrate	Amphibian	FWS Region 8: Pacific Southwest	CA	2	Is the species dependent on habitat with specialized hydrology pattern (e.g. wetland, vernal pool, seasonal streams; sensitivity to drought)?	Species relies on vernal pools for reproduction. "May not breed in drought years when pools fail to fill"; but requires periodic drying to remain free of fish.	natureserve	Hydrology	Yes
17	Ambystoma californiense	Salamander, California tiger	Vertebrate	Amphibian	FWS Region 8: Pacific Southwest	CA	3	Is the species or its habitat sensitive to or dependent upon a certain disturbance regime (e.g. old growth forest, fire-adapted system; seasonal floods)?			Disturbance	No
17	Ambystoma californiense	Salamander, California tiger	Vertebrate	Amphibian	FWS Region 8: Pacific Southwest	CA	4	Is the species or its habitat geographically restricted or confined by natural and/or anthropogenic barriers (e.g. mountain range, isolated soil type, coastal zone or island, or hemmed in by urban development)?			Isolation	No
17	Ambystoma californiense	Salamander, California tiger	Vertebrate	Amphibian	FWS Region 8: Pacific Southwest	CA	5	Is the species or its habitat threatened by the spread of invasive or “out of balance” species (e.g. weed, forest pest, novel disease)?	Highly susceptible to "introduction of exotic predatory animals (bullfrogs, crayfish, various fishes) that temporarily may occupy salamander breeding habitat"; chytrid fungus may potentially be a problem (not associated with die-offs to date).	NatureServe	Injurious species	Yes
17	Ambystoma californiense	Salamander, California tiger	Vertebrate	Amphibian	FWS Region 8: Pacific Southwest	CA	6	Is the species sensitive to changes in chemical concentration (e.g. elevated atmospheric CO2, change in water pH, or dissolved oxygen tolerance)?			Chemistry	No
17	Ambystoma californiense	Salamander, California tiger	Vertebrate	Amphibian	FWS Region 8: Pacific Southwest	CA	7	Does the species rely on particular triggers for life cycle events (breeding, migration, color change) that are likely to become out of sync with seasonal changes in resource availability or environmental conditions (phenologic mismatch)?			Phenology	No
17	Ambystoma californiense	Salamander, California tiger	Vertebrate	Amphibian	FWS Region 8: Pacific Southwest	CA	8	Is the species is dependent on one or a few other species (e.g. host, pollinator, dominant food item) and may have limited alternatives if the required species declines due to climate change?	"Lives in vacant or mammal-occupied burrows (e.g., California ground squirrel, valley pocker gopher) (Trenham 2001), occasionally other underground retreats, throughout most of the year; in grassland, savanna, or open woodland habitats. Sonoma County populations is closely associated with the presence of gopher burrows (see USFWS 2003)."	NatureServe	Obligate relationships	Yes
18	Ambystoma macrodactylum croceum	Salamander, Santa Cruz long-toed	Vertebrate	Amphibian	FWS Region 8: Pacific Southwest	CA	1	Does the species have specialized thermal tolerance (e.g. pika, trout) or depend on habitat with an important temperature threshold (e.g. sea ice)?			Temperature	No
18	Ambystoma macrodactylum croceum	Salamander, Santa Cruz long-toed	Vertebrate	Amphibian	FWS Region 8: Pacific Southwest	CA	2	Is the species dependent on habitat with specialized hydrology pattern (e.g. wetland, vernal pool, seasonal streams; sensitivity to drought)?	"Breeds in shallow ponds with abundant submerged vegetation; ponds fill in winter and spring, dry by late summer, must hold water for at least 90 days."	Natureserve	Hydrology	Yes
18	Ambystoma macrodactylum croceum	Salamander, Santa Cruz long-toed	Vertebrate	Amphibian	FWS Region 8: Pacific Southwest	CA	3	Is the species or its habitat sensitive to or dependent upon a certain disturbance regime (e.g. old growth forest, fire-adapted system; seasonal floods)?			Disturbance	No
18	Ambystoma macrodactylum croceum	Salamander, Santa Cruz long-toed	Vertebrate	Amphibian	FWS Region 8: Pacific Southwest	CA	4	Is the species or its habitat geographically restricted or confined by natural and/or anthropogenic barriers (e.g. mountain range, isolated soil type, coastal zone or island, or hemmed in by urban development)?	The ponds and adjacent scrub and woodland habitats are naturally restricted to small portions of the central Califorinia coast. It is also restricted by development.	Natreserve	Isolation	Yes
18	Ambystoma macrodactylum croceum	Salamander, Santa Cruz long-toed	Vertebrate	Amphibian	FWS Region 8: Pacific Southwest	CA	5	Is the species or its habitat threatened by the spread of invasive or “out of balance” species (e.g. weed, forest pest, novel disease)?	"Decline is attributable primarily to … loss of nonbreeding habitat and food resources due to the spread of exotic plants; predation by introduced fishes, bullfrogs, and tiger salamanders; and parasites (USFWS, Federal Register, 9 July 1999)."	Natureserve	Injurious species	Yes
18	Ambystoma macrodactylum croceum	Salamander, Santa Cruz long-toed	Vertebrate	Amphibian	FWS Region 8: Pacific Southwest	CA	6	Is the species sensitive to changes in chemical concentration (e.g. elevated atmospheric CO2, change in water pH, or dissolved oxygen tolerance)?			Chemistry	No
18	Ambystoma macrodactylum croceum	Salamander, Santa Cruz long-toed	Vertebrate	Amphibian	FWS Region 8: Pacific Southwest	CA	7	Does the species rely on particular triggers for life cycle events (breeding, migration, color change) that are likely to become out of sync with seasonal changes in resource availability or environmental conditions (phenologic mismatch)?	"Mating reaches peak in January-February, when heavy rains have filled breeding ponds. Eggs hatch in about a week; larvae metamorphose in 90-140 days, depending on temperature, then leave pond."	Natureserve	Phenology	Yes
18	Ambystoma macrodactylum croceum	Salamander, Santa Cruz long-toed	Vertebrate	Amphibian	FWS Region 8: Pacific Southwest	CA	8	Is the species is dependent on one or a few other species (e.g. host, pollinator, dominant food item) and may have limited alternatives if the required species declines due to climate change?			Obligate relationships	No
19	Ambystoma tigrinum stebbinsi	Salamander, Sonoran tiger	Vertebrate	Amphibian	FWS Region 2: Southwest	AZ	1	Does the species have specialized thermal tolerance (e.g. pika, trout) or depend on habitat with an important temperature threshold (e.g. sea ice)?	Metamorphosed adults are susceptible to environmental extremes (cause of mortality in the species) and often burrow in the ground to avoid these conditions. "Temperatures in the terrestrial_x000D_ environment range from below freezing to over 35oC."	species recovery plan (http://www.fws.gov/southwest/es/arizona/Documents/speciesDocs/SonoraSalamander/1Sonora_Tiger_Salamander_RP_1-03.pdf)	Temperature	Yes
19	Ambystoma tigrinum stebbinsi	Salamander, Sonoran tiger	Vertebrate	Amphibian	FWS Region 2: Southwest	AZ	2	Is the species dependent on habitat with specialized hydrology pattern (e.g. wetland, vernal pool, seasonal streams; sensitivity to drought)?	Species requires "standing water for breeding from January through June" and mainly uses cattle ponds (due to absence of its former habitat of vernal pools and cienagas). Drought may severely limit these habitat types and lead to reproductive failure in the species. Cattle ponds are also susceptible to storms and floods.	FWS species five-year review (http://www.fws.gov/southwest/es/arizona/Documents/speciesDocs/SonoraSalamander/STS%20five-yearReview.pdf); species recovery plan (http://www.fws.gov/southwest/es/arizona/Documents/speciesDocs/SonoraSalamander/1Sonora_Tiger_Salamander_RP_1-03.pdf)	Hydrology	Yes
19	Ambystoma tigrinum stebbinsi	Salamander, Sonoran tiger	Vertebrate	Amphibian	FWS Region 2: Southwest	AZ	3	Is the species or its habitat sensitive to or dependent upon a certain disturbance regime (e.g. old growth forest, fire-adapted system; seasonal floods)?	Cattle pond habitat is susceptible to storms and flooding.	FWS species five-year review (http://www.fws.gov/southwest/es/arizona/Documents/speciesDocs/SonoraSalamander/STS%20five-yearReview.pdf); species recovery plan (http://www.fws.gov/southwest/es/arizona/Documents/speciesDocs/SonoraSalamander/1Sonora_Tiger_Salamander_RP_1-03.pdf)	Disturbance	Yes
19	Ambystoma tigrinum stebbinsi	Salamander, Sonoran tiger	Vertebrate	Amphibian	FWS Region 2: Southwest	AZ	4	Is the species or its habitat geographically restricted or confined by natural and/or anthropogenic barriers (e.g. mountain range, isolated soil type, coastal zone or island, or hemmed in by urban development)?	Limited to "roughly 50 sites" with range size of "250-5000 square km (about 100-2000 square miles)" by availability of suitable pond habitat. Many cienegas and vernal pools in the environment have dried up or been destroyed by development and cattle production. Genetic hybridization with a similar species may also be a problem on the edge on their range.	NatureServe	Isolation	Yes
19	Ambystoma tigrinum stebbinsi	Salamander, Sonoran tiger	Vertebrate	Amphibian	FWS Region 2: Southwest	AZ	5	Is the species or its habitat threatened by the spread of invasive or “out of balance” species (e.g. weed, forest pest, novel disease)?	Species is susceptible to disease (Ambystoma tigrinum virus (ATV)), though many may recover from it.	FWS species five-year review (http://www.fws.gov/southwest/es/arizona/Documents/speciesDocs/SonoraSalamander/STS%20five-yearReview.pdf); species recovery plan (http://www.fws.gov/southwest/es/arizona/Documents/speciesDocs/SonoraSalamander/1Sonora_Tiger_Salamander_RP_1-03.pdf)	Injurious species	Yes
19	Ambystoma tigrinum stebbinsi	Salamander, Sonoran tiger	Vertebrate	Amphibian	FWS Region 2: Southwest	AZ	6	Is the species sensitive to changes in chemical concentration (e.g. elevated atmospheric CO2, change in water pH, or dissolved oxygen tolerance)?	species may be sensitive to changes in pH	species recovery plan (http://www.fws.gov/southwest/es/arizona/Documents/speciesDocs/SonoraSalamander/1Sonora_Tiger_Salamander_RP_1-03.pdf)	Chemistry	Yes
19	Ambystoma tigrinum stebbinsi	Salamander, Sonoran tiger	Vertebrate	Amphibian	FWS Region 2: Southwest	AZ	7	Does the species rely on particular triggers for life cycle events (breeding, migration, color change) that are likely to become out of sync with seasonal changes in resource availability or environmental conditions (phenologic mismatch)?			Phenology	No
19	Ambystoma tigrinum stebbinsi	Salamander, Sonoran tiger	Vertebrate	Amphibian	FWS Region 2: Southwest	AZ	8	Is the species is dependent on one or a few other species (e.g. host, pollinator, dominant food item) and may have limited alternatives if the required species declines due to climate change?			Obligate relationships	No
20	Ameiva polops	Lizard, St. Croix ground	Vertebrate	Reptile	FWS Region 4: Southeast	VI	1	Does the species have specialized thermal tolerance (e.g. pika, trout) or depend on habitat with an important temperature threshold (e.g. sea ice)?			Temperature	No
20	Ameiva polops	Lizard, St. Croix ground	Vertebrate	Reptile	FWS Region 4: Southeast	VI	2	Is the species dependent on habitat with specialized hydrology pattern (e.g. wetland, vernal pool, seasonal streams; sensitivity to drought)?			Hydrology	No
20	Ameiva polops	Lizard, St. Croix ground	Vertebrate	Reptile	FWS Region 4: Southeast	VI	3	Is the species or its habitat sensitive to or dependent upon a certain disturbance regime (e.g. old growth forest, fire-adapted system; seasonal floods)?			Disturbance	No
20	Ameiva polops	Lizard, St. Croix ground	Vertebrate	Reptile	FWS Region 4: Southeast	VI	4	Is the species or its habitat geographically restricted or confined by natural and/or anthropogenic barriers (e.g. mountain range, isolated soil type, coastal zone or island, or hemmed in by urban development)?	"Green Cay and Protestant Cay off the north shore of St. Croix are the only sites where A. polops remain as of August 1983."	recovery plan (http://ecos.fws.gov/docs/recovery_plan/840329.pdf)	Isolation	Yes
20	Ameiva polops	Lizard, St. Croix ground	Vertebrate	Reptile	FWS Region 4: Southeast	VI	5	Is the species or its habitat threatened by the spread of invasive or “out of balance” species (e.g. weed, forest pest, novel disease)?	There is "strong circumstantial evidence that correlates the decline of this species with the proliferation of the Small Indian mongoose (Herpestes auropunctatus)." Climate nexus unclear, however.	recovery plan (http://ecos.fws.gov/docs/recovery_plan/840329.pdf)	Injurious species	No
20	Ameiva polops	Lizard, St. Croix ground	Vertebrate	Reptile	FWS Region 4: Southeast	VI	6	Is the species sensitive to changes in chemical concentration (e.g. elevated atmospheric CO2, change in water pH, or dissolved oxygen tolerance)?			Chemistry	No
20	Ameiva polops	Lizard, St. Croix ground	Vertebrate	Reptile	FWS Region 4: Southeast	VI	7	Does the species rely on particular triggers for life cycle events (breeding, migration, color change) that are likely to become out of sync with seasonal changes in resource availability or environmental conditions (phenologic mismatch)?			Phenology	No
20	Ameiva polops	Lizard, St. Croix ground	Vertebrate	Reptile	FWS Region 4: Southeast	VI	8	Is the species is dependent on one or a few other species (e.g. host, pollinator, dominant food item) and may have limited alternatives if the required species declines due to climate change?	Dietary generalist.	recovery plan (http://ecos.fws.gov/docs/recovery_plan/840329.pdf)	Obligate relationships	No
21	Ammodramus maritimus mirabilis	Sparrow, Cape Sable seaside	Vertebrate	Bird	FWS Region 4: Southeast	FL	1	Does the species have specialized thermal tolerance (e.g. pika, trout) or depend on habitat with an important temperature threshold (e.g. sea ice)?			Temperature	No
21	Ammodramus maritimus mirabilis	Sparrow, Cape Sable seaside	Vertebrate	Bird	FWS Region 4: Southeast	FL	2	Is the species dependent on habitat with specialized hydrology pattern (e.g. wetland, vernal pool, seasonal streams; sensitivity to drought)?	Seasonally flooded coastal wetlands	NatureServe	Hydrology	Yes
21	Ammodramus maritimus mirabilis	Sparrow, Cape Sable seaside	Vertebrate	Bird	FWS Region 4: Southeast	FL	3	Is the species or its habitat sensitive to or dependent upon a certain disturbance regime (e.g. old growth forest, fire-adapted system; seasonal floods)?	"Occasional flooding can be a major cause of nest loss (Matthews and Moseley 1990)." Floods likely to significantly increase with sea level rise. Too high fire frequency also reduces habitat quality and leads to mortality. Fire frequency is also likely to increase with cliamte change.	NatureServe	Disturbance	Yes
21	Ammodramus maritimus mirabilis	Sparrow, Cape Sable seaside	Vertebrate	Bird	FWS Region 4: Southeast	FL	4	Is the species or its habitat geographically restricted or confined by natural and/or anthropogenic barriers (e.g. mountain range, isolated soil type, coastal zone or island, or hemmed in by urban development)?	Very small range: "<100-250 square km (less than about 40-100 square miles)"	NatureServe	Isolation	Yes
21	Ammodramus maritimus mirabilis	Sparrow, Cape Sable seaside	Vertebrate	Bird	FWS Region 4: Southeast	FL	5	Is the species or its habitat threatened by the spread of invasive or “out of balance” species (e.g. weed, forest pest, novel disease)?	Encroachment of non-native vegetation may result more frequently if fires and flooding increase	FWS five-year review (http://ecos.fws.gov/docs/five_year_review/doc3272.pdf)	Injurious species	Yes
21	Ammodramus maritimus mirabilis	Sparrow, Cape Sable seaside	Vertebrate	Bird	FWS Region 4: Southeast	FL	6	Is the species sensitive to changes in chemical concentration (e.g. elevated atmospheric CO2, change in water pH, or dissolved oxygen tolerance)?			Chemistry	No
21	Ammodramus maritimus mirabilis	Sparrow, Cape Sable seaside	Vertebrate	Bird	FWS Region 4: Southeast	FL	7	Does the species rely on particular triggers for life cycle events (breeding, migration, color change) that are likely to become out of sync with seasonal changes in resource availability or environmental conditions (phenologic mismatch)?			Phenology	No
21	Ammodramus maritimus mirabilis	Sparrow, Cape Sable seaside	Vertebrate	Bird	FWS Region 4: Southeast	FL	8	Is the species is dependent on one or a few other species (e.g. host, pollinator, dominant food item) and may have limited alternatives if the required species declines due to climate change?			Obligate relationships	No
22	Ammodramus savannarum floridanus	Sparrow, Florida grasshopper	Vertebrate	Bird	FWS Region 4: Southeast	FL	1	Does the species have specialized thermal tolerance (e.g. pika, trout) or depend on habitat with an important temperature threshold (e.g. sea ice)?			Temperature	No
22	Ammodramus savannarum floridanus	Sparrow, Florida grasshopper	Vertebrate	Bird	FWS Region 4: Southeast	FL	2	Is the species dependent on habitat with specialized hydrology pattern (e.g. wetland, vernal pool, seasonal streams; sensitivity to drought)?	Species "cannot successfully nest if water levels are too high" (sensitive to timing, amount, and intensity of water in habitat).	FWS recovery plan (http://www.fws.gov/verobeach/MSRPPDFs/FloridaGrasshopperSparrow.pdf)	Hydrology	Yes
22	Ammodramus savannarum floridanus	Sparrow, Florida grasshopper	Vertebrate	Bird	FWS Region 4: Southeast	FL	3	Is the species or its habitat sensitive to or dependent upon a certain disturbance regime (e.g. old growth forest, fire-adapted system; seasonal floods)?	Very specific habitat requirements --habitat is maintained by periodic fires	NatureServe; FWS recovery Plan (http://www.fws.gov/verobeach/MSRPPDFs/FloridaGrasshopperSparrow.pdf)	Disturbance	Yes
22	Ammodramus savannarum floridanus	Sparrow, Florida grasshopper	Vertebrate	Bird	FWS Region 4: Southeast	FL	4	Is the species or its habitat geographically restricted or confined by natural and/or anthropogenic barriers (e.g. mountain range, isolated soil type, coastal zone or island, or hemmed in by urban development)?	Very restricted range: "<100-250 square km (less than about 40-100 square miles)"; "occurs at seven scattered sites on public and private land."	NatureServe	Isolation	Yes
22	Ammodramus savannarum floridanus	Sparrow, Florida grasshopper	Vertebrate	Bird	FWS Region 4: Southeast	FL	5	Is the species or its habitat threatened by the spread of invasive or “out of balance” species (e.g. weed, forest pest, novel disease)?			Injurious species	No
22	Ammodramus savannarum floridanus	Sparrow, Florida grasshopper	Vertebrate	Bird	FWS Region 4: Southeast	FL	6	Is the species sensitive to changes in chemical concentration (e.g. elevated atmospheric CO2, change in water pH, or dissolved oxygen tolerance)?			Chemistry	No
22	Ammodramus savannarum floridanus	Sparrow, Florida grasshopper	Vertebrate	Bird	FWS Region 4: Southeast	FL	7	Does the species rely on particular triggers for life cycle events (breeding, migration, color change) that are likely to become out of sync with seasonal changes in resource availability or environmental conditions (phenologic mismatch)?			Phenology	No
22	Ammodramus savannarum floridanus	Sparrow, Florida grasshopper	Vertebrate	Bird	FWS Region 4: Southeast	FL	8	Is the species is dependent on one or a few other species (e.g. host, pollinator, dominant food item) and may have limited alternatives if the required species declines due to climate change?			Obligate relationships	No
23	Anaea troglodyta floridalis	Butterfly, Florida leafwing	Invertebrate	Arthropod	FWS Region 4: Southeast	FL	1	Does the species have specialized thermal tolerance (e.g. pika, trout) or depend on habitat with an important temperature threshold (e.g. sea ice)?			Temperature	No
23	Anaea troglodyta floridalis	Butterfly, Florida leafwing	Invertebrate	Arthropod	FWS Region 4: Southeast	FL	2	Is the species dependent on habitat with specialized hydrology pattern (e.g. wetland, vernal pool, seasonal streams; sensitivity to drought)?	Vegetation community is sensitive to salinity changes.	listing decision (http://www.gpo.gov/fdsys/pkg/FR-2014-08-12/pdf/2014-18614.pdf)	Hydrology	Yes
23	Anaea troglodyta floridalis	Butterfly, Florida leafwing	Invertebrate	Arthropod	FWS Region 4: Southeast	FL	3	Is the species or its habitat sensitive to or dependent upon a certain disturbance regime (e.g. old growth forest, fire-adapted system; seasonal floods)?	Requires a "goldilocks" fire regime; too little burning doesn't maintain habitat, too intense or wrongly timed kills individuals. Hurricanes also a threat.	Natureserve	Disturbance	Yes
23	Anaea troglodyta floridalis	Butterfly, Florida leafwing	Invertebrate	Arthropod	FWS Region 4: Southeast	FL	4	Is the species or its habitat geographically restricted or confined by natural and/or anthropogenic barriers (e.g. mountain range, isolated soil type, coastal zone or island, or hemmed in by urban development)?	Yes. Habitat is restricted, isolated, and threatened.	Natureserve	Isolation	Yes
23	Anaea troglodyta floridalis	Butterfly, Florida leafwing	Invertebrate	Arthropod	FWS Region 4: Southeast	FL	5	Is the species or its habitat threatened by the spread of invasive or “out of balance” species (e.g. weed, forest pest, novel disease)?	Fire ants and exotic plants are both major threats.	Natureserve, http://onlinelibrary.wiley.com/doi/10.1111/j.1366-9516.2005.00142.x/abstract	Injurious species	Yes
23	Anaea troglodyta floridalis	Butterfly, Florida leafwing	Invertebrate	Arthropod	FWS Region 4: Southeast	FL	6	Is the species sensitive to changes in chemical concentration (e.g. elevated atmospheric CO2, change in water pH, or dissolved oxygen tolerance)?			Chemistry	No
23	Anaea troglodyta floridalis	Butterfly, Florida leafwing	Invertebrate	Arthropod	FWS Region 4: Southeast	FL	7	Does the species rely on particular triggers for life cycle events (breeding, migration, color change) that are likely to become out of sync with seasonal changes in resource availability or environmental conditions (phenologic mismatch)?			Phenology	No
23	Anaea troglodyta floridalis	Butterfly, Florida leafwing	Invertebrate	Arthropod	FWS Region 4: Southeast	FL	8	Is the species is dependent on one or a few other species (e.g. host, pollinator, dominant food item) and may have limited alternatives if the required species declines due to climate change?	Larvae depend mainly on a single species, Croton linearis.	Natureserve	Obligate relationships	Yes
24	Anas laysanensis	Duck, Laysan	Vertebrate	Bird	FWS Region 1: Pacific	HI	1	Does the species have specialized thermal tolerance (e.g. pika, trout) or depend on habitat with an important temperature threshold (e.g. sea ice)?			Temperature	No
24	Anas laysanensis	Duck, Laysan	Vertebrate	Bird	FWS Region 1: Pacific	HI	2	Is the species dependent on habitat with specialized hydrology pattern (e.g. wetland, vernal pool, seasonal streams; sensitivity to drought)?	Needs access to fresh water	NatureServe	Hydrology	Yes
24	Anas laysanensis	Duck, Laysan	Vertebrate	Bird	FWS Region 1: Pacific	HI	3	Is the species or its habitat sensitive to or dependent upon a certain disturbance regime (e.g. old growth forest, fire-adapted system; seasonal floods)?			Disturbance	No
24	Anas laysanensis	Duck, Laysan	Vertebrate	Bird	FWS Region 1: Pacific	HI	4	Is the species or its habitat geographically restricted or confined by natural and/or anthropogenic barriers (e.g. mountain range, isolated soil type, coastal zone or island, or hemmed in by urban development)?	"<100 square km (less than about 40 square miles) on Laysan Island. Resident on Laysan Island, northwestern Hawaiian Islands. Subfossils and ancient DNA indicate that this duck formerly was widespread in the Hawaiian Islands (Cooper et al. 1996)."	NatureServe	Isolation	Yes
24	Anas laysanensis	Duck, Laysan	Vertebrate	Bird	FWS Region 1: Pacific	HI	5	Is the species or its habitat threatened by the spread of invasive or “out of balance” species (e.g. weed, forest pest, novel disease)?	Species' habitat is threatened by invasive grasses which may be favored by climate c hange	http://www.fws.gov/pacificislands/fauna/laysanduck.html	Injurious species	Yes
24	Anas laysanensis	Duck, Laysan	Vertebrate	Bird	FWS Region 1: Pacific	HI	6	Is the species sensitive to changes in chemical concentration (e.g. elevated atmospheric CO2, change in water pH, or dissolved oxygen tolerance)?			Chemistry	No
24	Anas laysanensis	Duck, Laysan	Vertebrate	Bird	FWS Region 1: Pacific	HI	7	Does the species rely on particular triggers for life cycle events (breeding, migration, color change) that are likely to become out of sync with seasonal changes in resource availability or environmental conditions (phenologic mismatch)?			Phenology	No
24	Anas laysanensis	Duck, Laysan	Vertebrate	Bird	FWS Region 1: Pacific	HI	8	Is the species is dependent on one or a few other species (e.g. host, pollinator, dominant food item) and may have limited alternatives if the required species declines due to climate change?			Obligate relationships	No
25	Anas wyvilliana	Duck, Hawaiian	Vertebrate	Bird	FWS Region 1: Pacific	HI	1	Does the species have specialized thermal tolerance (e.g. pika, trout) or depend on habitat with an important temperature threshold (e.g. sea ice)?			Temperature	No
25	Anas wyvilliana	Duck, Hawaiian	Vertebrate	Bird	FWS Region 1: Pacific	HI	2	Is the species dependent on habitat with specialized hydrology pattern (e.g. wetland, vernal pool, seasonal streams; sensitivity to drought)?	Occurs in wetland habitat -- susceptible to drainage and drought conditions	NatureServe	Hydrology	Yes
25	Anas wyvilliana	Duck, Hawaiian	Vertebrate	Bird	FWS Region 1: Pacific	HI	3	Is the species or its habitat sensitive to or dependent upon a certain disturbance regime (e.g. old growth forest, fire-adapted system; seasonal floods)?			Disturbance	No
25	Anas wyvilliana	Duck, Hawaiian	Vertebrate	Bird	FWS Region 1: Pacific	HI	4	Is the species or its habitat geographically restricted or confined by natural and/or anthropogenic barriers (e.g. mountain range, isolated soil type, coastal zone or island, or hemmed in by urban development)?	Formerly found be throughout Hawaiian Islands and is now limited from much of its original range. Hybridization with mallards is a problem.	NatureServe	Isolation	No
25	Anas wyvilliana	Duck, Hawaiian	Vertebrate	Bird	FWS Region 1: Pacific	HI	5	Is the species or its habitat threatened by the spread of invasive or “out of balance” species (e.g. weed, forest pest, novel disease)?	Species is susceptible to avian botulism. Outbreaks can be triggered by anaerobic conditions in warm water with decomposing vegetation and invertebrates. Also, some of the nonnative plants that degrade habitat (water hyacinth, mangrove) may be favored under CC	http://www.fws.gov/pacificislands/fauna/HIduck.html	Injurious species	Yes
25	Anas wyvilliana	Duck, Hawaiian	Vertebrate	Bird	FWS Region 1: Pacific	HI	6	Is the species sensitive to changes in chemical concentration (e.g. elevated atmospheric CO2, change in water pH, or dissolved oxygen tolerance)?			Chemistry	No
25	Anas wyvilliana	Duck, Hawaiian	Vertebrate	Bird	FWS Region 1: Pacific	HI	7	Does the species rely on particular triggers for life cycle events (breeding, migration, color change) that are likely to become out of sync with seasonal changes in resource availability or environmental conditions (phenologic mismatch)?			Phenology	No
25	Anas wyvilliana	Duck, Hawaiian	Vertebrate	Bird	FWS Region 1: Pacific	HI	8	Is the species is dependent on one or a few other species (e.g. host, pollinator, dominant food item) and may have limited alternatives if the required species declines due to climate change?			Obligate relationships	No
26	Anaxyrus baxteri	Toad, Wyoming	Vertebrate	Amphibian	FWS Region 6: Mountain Prairie	WY	1	Does the species have specialized thermal tolerance (e.g. pika, trout) or depend on habitat with an important temperature threshold (e.g. sea ice)?			Temperature	No
26	Anaxyrus baxteri	Toad, Wyoming	Vertebrate	Amphibian	FWS Region 6: Mountain Prairie	WY	2	Is the species dependent on habitat with specialized hydrology pattern (e.g. wetland, vernal pool, seasonal streams; sensitivity to drought)?	"A population at a former reintroduction site (Lake George on the Hutton Lake National Wildlife Refuge) has been lost due to drought (USFWS 2002)."	Natureserve	Hydrology	Yes
26	Anaxyrus baxteri	Toad, Wyoming	Vertebrate	Amphibian	FWS Region 6: Mountain Prairie	WY	3	Is the species or its habitat sensitive to or dependent upon a certain disturbance regime (e.g. old growth forest, fire-adapted system; seasonal floods)?			Disturbance	No
26	Anaxyrus baxteri	Toad, Wyoming	Vertebrate	Amphibian	FWS Region 6: Mountain Prairie	WY	4	Is the species or its habitat geographically restricted or confined by natural and/or anthropogenic barriers (e.g. mountain range, isolated soil type, coastal zone or island, or hemmed in by urban development)?	Only one extant population exists, at Mortenson Lake National Wildlife Refuge as of 2002.	Natureserve	Isolation	Yes
26	Anaxyrus baxteri	Toad, Wyoming	Vertebrate	Amphibian	FWS Region 6: Mountain Prairie	WY	5	Is the species or its habitat threatened by the spread of invasive or “out of balance” species (e.g. weed, forest pest, novel disease)?	Chytrid fungus and tamarisk are both threats.	Natureserve	Injurious species	Yes
26	Anaxyrus baxteri	Toad, Wyoming	Vertebrate	Amphibian	FWS Region 6: Mountain Prairie	WY	6	Is the species sensitive to changes in chemical concentration (e.g. elevated atmospheric CO2, change in water pH, or dissolved oxygen tolerance)?	"Mortenson Lake recently has become more saline (and less suitable for toads) as a result of drought-related increases in evaporation (USFWS 2002)."	Natureserve	Chemistry	No
26	Anaxyrus baxteri	Toad, Wyoming	Vertebrate	Amphibian	FWS Region 6: Mountain Prairie	WY	7	Does the species rely on particular triggers for life cycle events (breeding, migration, color change) that are likely to become out of sync with seasonal changes in resource availability or environmental conditions (phenologic mismatch)?			Phenology	No
26	Anaxyrus baxteri	Toad, Wyoming	Vertebrate	Amphibian	FWS Region 6: Mountain Prairie	WY	8	Is the species is dependent on one or a few other species (e.g. host, pollinator, dominant food item) and may have limited alternatives if the required species declines due to climate change?			Obligate relationships	No
27	Antilocapra americana sonoriensis	Pronghorn, Sonoran	Vertebrate	Mammal	FWS Region 2: Southwest	AZ	1	Does the species have specialized thermal tolerance (e.g. pika, trout) or depend on habitat with an important temperature threshold (e.g. sea ice)?	Recovery plan posits "thermal stress" as a suspected mortality factor.	2016 recovery plan: https://ecos.fws.gov/docs/recovery_plan/FINAL%20Sonoran%20Pronghorn%20Recovery%20Plan,%202nd%20Revision%2011.16.16.pdf	Temperature	Yes
27	Antilocapra americana sonoriensis	Pronghorn, Sonoran	Vertebrate	Mammal	FWS Region 2: Southwest	AZ	2	Is the species dependent on habitat with specialized hydrology pattern (e.g. wetland, vernal pool, seasonal streams; sensitivity to drought)?	Availability of free water reportedly is a critical factor (Hoffmeister 1986), following severe drought conditions that persisted through 2002, the entire U.S. Sonoran pronghorn population declined to an estimated 21 animals. If the drought had continued, it is likely that the U.S. population would have been extirpated. Recovery plan notes that drought-induced changes to forage quality are an imp…	2016 recovery plan:https://ecos.fws.gov/docs/recovery_plan/FINAL%20Sonoran%20Pronghorn%20Recovery%20Plan,%202nd%20Revision%2011.16.16.pdf	Hydrology	Yes
27	Antilocapra americana sonoriensis	Pronghorn, Sonoran	Vertebrate	Mammal	FWS Region 2: Southwest	AZ	3	Is the species or its habitat sensitive to or dependent upon a certain disturbance regime (e.g. old growth forest, fire-adapted system; seasonal floods)?	Habitat is sensitive to changes in wildfire regime brought on by invasive species and drought.	2016 recovery plan: https://ecos.fws.gov/docs/recovery_plan/FINAL%20Sonoran%20Pronghorn%20Recovery%20Plan,%202nd%20Revision%2011.16.16.pdf	Disturbance	No
27	Antilocapra americana sonoriensis	Pronghorn, Sonoran	Vertebrate	Mammal	FWS Region 2: Southwest	AZ	4	Is the species or its habitat geographically restricted or confined by natural and/or anthropogenic barriers (e.g. mountain range, isolated soil type, coastal zone or island, or hemmed in by urban development)?	Sonoran pronghorn have not adapted to any form of artificial barrier placed within their range and only infrequently cross roads, railroad tracks, or fences (cf. Brown and Ockenfels, 2007:28-32). Thus, they have severely contracted their original range in the U.S. to the current fragment bounded on the north by Interstate 8, on the east by Arizona State Route 85 (S.R. 85), and on the west by the …	2016 recovery plan: https://ecos.fws.gov/docs/recovery_plan/FINAL%20Sonoran%20Pronghorn%20Recovery%20Plan,%202nd%20Revision%2011.16.16.pdf	Isolation	Yes
27	Antilocapra americana sonoriensis	Pronghorn, Sonoran	Vertebrate	Mammal	FWS Region 2: Southwest	AZ	5	Is the species or its habitat threatened by the spread of invasive or “out of balance” species (e.g. weed, forest pest, novel disease)?			Injurious species	No
27	Antilocapra americana sonoriensis	Pronghorn, Sonoran	Vertebrate	Mammal	FWS Region 2: Southwest	AZ	6	Is the species sensitive to changes in chemical concentration (e.g. elevated atmospheric CO2, change in water pH, or dissolved oxygen tolerance)?			Chemistry	No
27	Antilocapra americana sonoriensis	Pronghorn, Sonoran	Vertebrate	Mammal	FWS Region 2: Southwest	AZ	7	Does the species rely on particular triggers for life cycle events (breeding, migration, color change) that are likely to become out of sync with seasonal changes in resource availability or environmental conditions (phenologic mismatch)?			Phenology	No
27	Antilocapra americana sonoriensis	Pronghorn, Sonoran	Vertebrate	Mammal	FWS Region 2: Southwest	AZ	8	Is the species is dependent on one or a few other species (e.g. host, pollinator, dominant food item) and may have limited alternatives if the required species declines due to climate change?			Obligate relationships	No
28	Antrobia culveri	Cavesnail, Tumbling Creek	Invertebrate	Mollusk	FWS Region 3: Midwest	MO	1	Does the species have specialized thermal tolerance (e.g. pika, trout) or depend on habitat with an important temperature threshold (e.g. sea ice)?			Temperature	No
28	Antrobia culveri	Cavesnail, Tumbling Creek	Invertebrate	Mollusk	FWS Region 3: Midwest	MO	2	Is the species dependent on habitat with specialized hydrology pattern (e.g. wetland, vernal pool, seasonal streams; sensitivity to drought)?	Cave-dwelling snail extremely sensitve to drought.	Natureserve	Hydrology	Yes
28	Antrobia culveri	Cavesnail, Tumbling Creek	Invertebrate	Mollusk	FWS Region 3: Midwest	MO	3	Is the species or its habitat sensitive to or dependent upon a certain disturbance regime (e.g. old growth forest, fire-adapted system; seasonal floods)?			Disturbance	No
28	Antrobia culveri	Cavesnail, Tumbling Creek	Invertebrate	Mollusk	FWS Region 3: Midwest	MO	4	Is the species or its habitat geographically restricted or confined by natural and/or anthropogenic barriers (e.g. mountain range, isolated soil type, coastal zone or island, or hemmed in by urban development)?	"(<100 square km (less than about 40 square miles)) Known only from in single stream in Tumbling Creek Cave in southwestern Missouri (Wu et. al. 1997)."	Natureserve	Isolation	Yes
28	Antrobia culveri	Cavesnail, Tumbling Creek	Invertebrate	Mollusk	FWS Region 3: Midwest	MO	5	Is the species or its habitat threatened by the spread of invasive or “out of balance” species (e.g. weed, forest pest, novel disease)?			Injurious species	No
28	Antrobia culveri	Cavesnail, Tumbling Creek	Invertebrate	Mollusk	FWS Region 3: Midwest	MO	6	Is the species sensitive to changes in chemical concentration (e.g. elevated atmospheric CO2, change in water pH, or dissolved oxygen tolerance)?	Like many acquatic species, this snail is adversely affected by lower than optimal dissolved oxygen concentration.	recovery plan (http://ecos.fws.gov/docs/recovery_plan/030922a.pdf)	Chemistry	Yes
28	Antrobia culveri	Cavesnail, Tumbling Creek	Invertebrate	Mollusk	FWS Region 3: Midwest	MO	7	Does the species rely on particular triggers for life cycle events (breeding, migration, color change) that are likely to become out of sync with seasonal changes in resource availability or environmental conditions (phenologic mismatch)?			Phenology	No
28	Antrobia culveri	Cavesnail, Tumbling Creek	Invertebrate	Mollusk	FWS Region 3: Midwest	MO	8	Is the species is dependent on one or a few other species (e.g. host, pollinator, dominant food item) and may have limited alternatives if the required species declines due to climate change?			Obligate relationships	No
29	Aplodontia rufa nigra	Mountain beaver, Point Arena	Vertebrate	Mammal	FWS Region 8: Pacific Southwest	CA	1	Does the species have specialized thermal tolerance (e.g. pika, trout) or depend on habitat with an important temperature threshold (e.g. sea ice)?	Species has "limited ability to thermoregulate" and one reason for their limited distribution may be sensitivity to high temperatures. "They seem to tolerate low temperature extremes better than high ones, with a lethal body temperature of about 42 degrees Centigrade (108 degrees Fahrenheit) (Johnson 1971). When exposed to high ambient temperatures, animals in captivity respond by either reducing…	FWS recovery plan, http://www.fws.gov/arcata/es/mammals/mtnbeaver/documents/1998%20Recovery%20Plan%20for%20the%20Point%20Arena%20Mountain%20Beaver.pdf	Temperature	Yes
29	Aplodontia rufa nigra	Mountain beaver, Point Arena	Vertebrate	Mammal	FWS Region 8: Pacific Southwest	CA	2	Is the species dependent on habitat with specialized hydrology pattern (e.g. wetland, vernal pool, seasonal streams; sensitivity to drought)?	Species has primitive renal system which does not allow it to concentrate urine. "One consequence of this inability to concentrate urine is that mountain beaver require large quantities of water to replace that lost through excretion (Nungesser et al. 1960, Dolph et al. 196;’ Nungesser and Pfeiffer 1965). a need that may be a major reason why mountain beaver are restricted to moist environments (…	FWS recovery plan, http://www.fws.gov/arcata/es/mammals/mtnbeaver/documents/1998%20Recovery%20Plan%20for%20the%20Point%20Arena%20Mountain%20Beaver.pdf	Hydrology	Yes
29	Aplodontia rufa nigra	Mountain beaver, Point Arena	Vertebrate	Mammal	FWS Region 8: Pacific Southwest	CA	3	Is the species or its habitat sensitive to or dependent upon a certain disturbance regime (e.g. old growth forest, fire-adapted system; seasonal floods)?	Habitat required is a specific seral stage (brushy/scrubby) that occurs before succession to more mature forest habitat.	FWS recovery plan and five-year review, http://www.fws.gov/arcata/es/mammals/mtnbeaver/documents/1998%20Recovery%20Plan%20for%20the%20Point%20Arena%20Mountain%20Beaver.pdf	Disturbance	Yes
29	Aplodontia rufa nigra	Mountain beaver, Point Arena	Vertebrate	Mammal	FWS Region 8: Pacific Southwest	CA	4	Is the species or its habitat geographically restricted or confined by natural and/or anthropogenic barriers (e.g. mountain range, isolated soil type, coastal zone or island, or hemmed in by urban development)?	Population is restricted to small coastal portion of Coastal Mendocino County, California. Range is "less than 100-250 square km (less than about 40-100 square miles)" and population is extremely susceptible to natural disasters or other events stochastic events that cause high mortality. Species also occurs in location threatened by sea level rise (particularly coastal bluff populations)	NatureServe	Isolation	Yes
29	Aplodontia rufa nigra	Mountain beaver, Point Arena	Vertebrate	Mammal	FWS Region 8: Pacific Southwest	CA	5	Is the species or its habitat threatened by the spread of invasive or “out of balance” species (e.g. weed, forest pest, novel disease)?	The species habitat may threatened by plant invaders, many of which are likely to benefit from climate change, but the species also utilizes some invasive plants such as ice plant so scored this as a neutral factor.	FWS recovery plan, http://www.fws.gov/arcata/es/mammals/mtnbeaver/documents/1998%20Recovery%20Plan%20for%20the%20Point%20Arena%20Mountain%20Beaver.pdf	Injurious species	No
29	Aplodontia rufa nigra	Mountain beaver, Point Arena	Vertebrate	Mammal	FWS Region 8: Pacific Southwest	CA	6	Is the species sensitive to changes in chemical concentration (e.g. elevated atmospheric CO2, change in water pH, or dissolved oxygen tolerance)?		FWS recovery plan, http://www.fws.gov/arcata/es/mammals/mtnbeaver/documents/1998%20Recovery%20Plan%20for%20the%20Point%20Arena%20Mountain%20Beaver.pdf	Chemistry	No
29	Aplodontia rufa nigra	Mountain beaver, Point Arena	Vertebrate	Mammal	FWS Region 8: Pacific Southwest	CA	7	Does the species rely on particular triggers for life cycle events (breeding, migration, color change) that are likely to become out of sync with seasonal changes in resource availability or environmental conditions (phenologic mismatch)?		FWS recovery plan, http://www.fws.gov/arcata/es/mammals/mtnbeaver/documents/1998%20Recovery%20Plan%20for%20the%20Point%20Arena%20Mountain%20Beaver.pdf	Phenology	No
29	Aplodontia rufa nigra	Mountain beaver, Point Arena	Vertebrate	Mammal	FWS Region 8: Pacific Southwest	CA	8	Is the species is dependent on one or a few other species (e.g. host, pollinator, dominant food item) and may have limited alternatives if the required species declines due to climate change?		FWS recovery plan, http://www.fws.gov/arcata/es/mammals/mtnbeaver/documents/1998%20Recovery%20Plan%20for%20the%20Point%20Arena%20Mountain%20Beaver.pdf	Obligate relationships	No
30	Apodemia mormo langei	Butterfly, Lange's metalmark	Invertebrate	Arthropod	FWS Region 8: Pacific Southwest	CA	1	Does the species have specialized thermal tolerance (e.g. pika, trout) or depend on habitat with an important temperature threshold (e.g. sea ice)?			Temperature	No
30	Apodemia mormo langei	Butterfly, Lange's metalmark	Invertebrate	Arthropod	FWS Region 8: Pacific Southwest	CA	2	Is the species dependent on habitat with specialized hydrology pattern (e.g. wetland, vernal pool, seasonal streams; sensitivity to drought)?			Hydrology	No
30	Apodemia mormo langei	Butterfly, Lange's metalmark	Invertebrate	Arthropod	FWS Region 8: Pacific Southwest	CA	3	Is the species or its habitat sensitive to or dependent upon a certain disturbance regime (e.g. old growth forest, fire-adapted system; seasonal floods)?	"Xerces Society red list profile of this species (Black and Vaughan 2005) points out that about 40% of the habitat burned in 2000 and that recent counts have been under 450 adults." Increasing frequency/severity of fires in California may destroy remnant population.	Natureserve	Disturbance	Yes
30	Apodemia mormo langei	Butterfly, Lange's metalmark	Invertebrate	Arthropod	FWS Region 8: Pacific Southwest	CA	4	Is the species or its habitat geographically restricted or confined by natural and/or anthropogenic barriers (e.g. mountain range, isolated soil type, coastal zone or island, or hemmed in by urban development)?	Endemic to Antioch Dunes NWR and immediately adjacent (<150 meters) land. The entire dune system is now about 67 acres, not all of which supports Lange's metalmark.	Natureserve	Isolation	Yes
30	Apodemia mormo langei	Butterfly, Lange's metalmark	Invertebrate	Arthropod	FWS Region 8: Pacific Southwest	CA	5	Is the species or its habitat threatened by the spread of invasive or “out of balance” species (e.g. weed, forest pest, novel disease)?	"The main threat as of 2008 is thought to be invasive weeds affecting the foodplant (Eriogonum latifolium ssp. auriculatum), and possibly other aspects of the habitat." "Extremely sensitive to loss of host plant, as will not utilize host until it is four or five years old."	Natureserve	Injurious species	Yes
30	Apodemia mormo langei	Butterfly, Lange's metalmark	Invertebrate	Arthropod	FWS Region 8: Pacific Southwest	CA	6	Is the species sensitive to changes in chemical concentration (e.g. elevated atmospheric CO2, change in water pH, or dissolved oxygen tolerance)?			Chemistry	No
30	Apodemia mormo langei	Butterfly, Lange's metalmark	Invertebrate	Arthropod	FWS Region 8: Pacific Southwest	CA	7	Does the species rely on particular triggers for life cycle events (breeding, migration, color change) that are likely to become out of sync with seasonal changes in resource availability or environmental conditions (phenologic mismatch)?			Phenology	No
30	Apodemia mormo langei	Butterfly, Lange's metalmark	Invertebrate	Arthropod	FWS Region 8: Pacific Southwest	CA	8	Is the species is dependent on one or a few other species (e.g. host, pollinator, dominant food item) and may have limited alternatives if the required species declines due to climate change?	Relies on a single host plant, Eriogonum latifolium ssp. Auriculatum	recovery plan (http://ecos.fws.gov/docs/recovery_plan/Antioch%20Dunes%20species%20(1).pdf)	Obligate relationships	Yes
31	Arkansia wheeleri	Pocketbook, Ouachita rock	Invertebrate	Mollusk	FWS Region 2: Southwest	AR, OK	1	Does the species have specialized thermal tolerance (e.g. pika, trout) or depend on habitat with an important temperature threshold (e.g. sea ice)?	Species is likely sensitive to changes in water temperature.	recovery plan (http://ecos.fws.gov/docs/recovery_plan/040602.pdf)	Temperature	Yes
31	Arkansia wheeleri	Pocketbook, Ouachita rock	Invertebrate	Mollusk	FWS Region 2: Southwest	AR, OK	2	Is the species dependent on habitat with specialized hydrology pattern (e.g. wetland, vernal pool, seasonal streams; sensitivity to drought)?	Species is sensitive to desiccation due to loss of water (from impoundments, drought or surface water diversions); species is also sensitive to changes in flow.	species recovery plan (http://ecos.fws.gov/docs/recovery_plan/040602.pdf)	Hydrology	Yes
31	Arkansia wheeleri	Pocketbook, Ouachita rock	Invertebrate	Mollusk	FWS Region 2: Southwest	AR, OK	3	Is the species or its habitat sensitive to or dependent upon a certain disturbance regime (e.g. old growth forest, fire-adapted system; seasonal floods)?			Disturbance	No
31	Arkansia wheeleri	Pocketbook, Ouachita rock	Invertebrate	Mollusk	FWS Region 2: Southwest	AR, OK	4	Is the species or its habitat geographically restricted or confined by natural and/or anthropogenic barriers (e.g. mountain range, isolated soil type, coastal zone or island, or hemmed in by urban development)?	Formerly found across multiple river basins. Species is geographically limited within its original small range due to habitat loss.	NatureServe	Isolation	No
31	Arkansia wheeleri	Pocketbook, Ouachita rock	Invertebrate	Mollusk	FWS Region 2: Southwest	AR, OK	5	Is the species or its habitat threatened by the spread of invasive or “out of balance” species (e.g. weed, forest pest, novel disease)?	Species is threatened by zebra mussel, a species which is likely to expand in range and abundance under CC	NatureServe	Injurious species	Yes
31	Arkansia wheeleri	Pocketbook, Ouachita rock	Invertebrate	Mollusk	FWS Region 2: Southwest	AR, OK	6	Is the species sensitive to changes in chemical concentration (e.g. elevated atmospheric CO2, change in water pH, or dissolved oxygen tolerance)?	species is sensitive to changes in water quality, including many changes caused by impoundment such as reduced dissolved oxygen, and increased carbon dioxide and changes in pH	species recovery plan (http://ecos.fws.gov/docs/recovery_plan/040602.pdf)	Chemistry	Yes
31	Arkansia wheeleri	Pocketbook, Ouachita rock	Invertebrate	Mollusk	FWS Region 2: Southwest	AR, OK	7	Does the species rely on particular triggers for life cycle events (breeding, migration, color change) that are likely to become out of sync with seasonal changes in resource availability or environmental conditions (phenologic mismatch)?			Phenology	No
31	Arkansia wheeleri	Pocketbook, Ouachita rock	Invertebrate	Mollusk	FWS Region 2: Southwest	AR, OK	8	Is the species is dependent on one or a few other species (e.g. host, pollinator, dominant food item) and may have limited alternatives if the required species declines due to climate change?	"The natural fish host(s) of the Ouachita rock pocketbook remain(s) unknown. Nearly all unionid mussel species must parasitize fish to transform from glochidium to juvenile, and many can successfully parasitize only one to a few fish species (Lefevre and Curtis 1912, Coker et al. 1922). This narrow dependency on specific host fish is one of the main factors contributing to the high sensitivity of…	NatureServe; species recovery plan (http://ecos.fws.gov/docs/recovery_plan/040602.pdf)	Obligate relationships	Yes
32	Assiminea pecos	Snail, Pecos assiminea	Invertebrate	Mollusk	FWS Region 2: Southwest	NM, TX	1	Does the species have specialized thermal tolerance (e.g. pika, trout) or depend on habitat with an important temperature threshold (e.g. sea ice)?			Temperature	No
32	Assiminea pecos	Snail, Pecos assiminea	Invertebrate	Mollusk	FWS Region 2: Southwest	NM, TX	2	Is the species dependent on habitat with specialized hydrology pattern (e.g. wetland, vernal pool, seasonal streams; sensitivity to drought)?	Species requires certain moisture levels on soil and access to spring fed water systems. Adequate moisture levels under vegetation can help it survive fires (vulnerable to fire since it lives on the surface). Species is also sensitive to changes in salinity that can be caused by invasive tamarisk. Decreased spring flow (caused by climate change induced drought) could lead to a decrease in the amo…	FWS five-year review (http://ecos.fws.gov/docs/five_year_review/doc3600.pdf)	Hydrology	Yes
32	Assiminea pecos	Snail, Pecos assiminea	Invertebrate	Mollusk	FWS Region 2: Southwest	NM, TX	3	Is the species or its habitat sensitive to or dependent upon a certain disturbance regime (e.g. old growth forest, fire-adapted system; seasonal floods)?	Species may be sensitive to removal of vegetation via fires. "It is likely that Pecos assiminea may survive fire or other vegetation reduction if sufficient litter and ground cover remain to sustain appropriate soil moisture and humidity at a microhabitat scale (NMDGF 2005, Service 2004). Complete combustion of vegetation and litter, high soil temperatures during fire, or extensive vegetation rem…	NatureServe, FWS five-year review (http://ecos.fws.gov/docs/five_year_review/doc3600.pdf)	Disturbance	No
32	Assiminea pecos	Snail, Pecos assiminea	Invertebrate	Mollusk	FWS Region 2: Southwest	NM, TX	4	Is the species or its habitat geographically restricted or confined by natural and/or anthropogenic barriers (e.g. mountain range, isolated soil type, coastal zone or island, or hemmed in by urban development)?	Species is restricted to spring location in a habitat island of unsuitable arid lands. Species cannot move among springs. "Probably >10,000 individuals occupying 800 ha (<2,000 acres) of spring run. At Bitter Creek occupies about 0.8 km (0.5 mi) of spring run, and at Diamond Y occupies about 1.5 km (1 mi) of spring and spring run (Taylor, 1987; USFWS, 2005; 2010). Extirpated at two sites in Roswe…	NatureServe, FWS five-year review (http://ecos.fws.gov/docs/five_year_review/doc3600.pdf)	Isolation	Yes
32	Assiminea pecos	Snail, Pecos assiminea	Invertebrate	Mollusk	FWS Region 2: Southwest	NM, TX	5	Is the species or its habitat threatened by the spread of invasive or “out of balance” species (e.g. weed, forest pest, novel disease)?	Species habitat is threatened by several non-native plants including tamarisk (salt cedar), common reed, and tumbleweed. These species may all become more prevalent under climate change and the ecosystem alterations they cause (such as the tamarisk increasing water salinity) may become more problematic under climate change. Efforts to remove them are also problematic for the species.	FWS five-year review (http://ecos.fws.gov/docs/five_year_review/doc3600.pdf)	Injurious species	Yes
32	Assiminea pecos	Snail, Pecos assiminea	Invertebrate	Mollusk	FWS Region 2: Southwest	NM, TX	6	Is the species sensitive to changes in chemical concentration (e.g. elevated atmospheric CO2, change in water pH, or dissolved oxygen tolerance)?			Chemistry	No
32	Assiminea pecos	Snail, Pecos assiminea	Invertebrate	Mollusk	FWS Region 2: Southwest	NM, TX	7	Does the species rely on particular triggers for life cycle events (breeding, migration, color change) that are likely to become out of sync with seasonal changes in resource availability or environmental conditions (phenologic mismatch)?			Phenology	No
32	Assiminea pecos	Snail, Pecos assiminea	Invertebrate	Mollusk	FWS Region 2: Southwest	NM, TX	8	Is the species is dependent on one or a few other species (e.g. host, pollinator, dominant food item) and may have limited alternatives if the required species declines due to climate change?			Obligate relationships	No
33	Athearnia anthonyi	Riversnail, Anthony's	Invertebrate	Mollusk	FWS Region 4: Southeast	AL, GA, TN	1	Does the species have specialized thermal tolerance (e.g. pika, trout) or depend on habitat with an important temperature threshold (e.g. sea ice)?	Nothing specific mentioned here though it was noted that sedimentation can raise stream temperatures which likely affects the species	FWS five-year review (http://ecos.fws.gov/docs/five_year_review/doc3619.pdf)	Temperature	No
33	Athearnia anthonyi	Riversnail, Anthony's	Invertebrate	Mollusk	FWS Region 4: Southeast	AL, GA, TN	2	Is the species dependent on habitat with specialized hydrology pattern (e.g. wetland, vernal pool, seasonal streams; sensitivity to drought)?	Species requires adequate water flow and does not tolerate impoundments.	FWS five-year review (http://ecos.fws.gov/docs/five_year_review/doc3619.pdf)	Hydrology	Yes
33	Athearnia anthonyi	Riversnail, Anthony's	Invertebrate	Mollusk	FWS Region 4: Southeast	AL, GA, TN	3	Is the species or its habitat sensitive to or dependent upon a certain disturbance regime (e.g. old growth forest, fire-adapted system; seasonal floods)?	Very sensitive to the effects of ongoing sedimentation (mainly in terms of water quality loss) which suggests it would be sensitive to major flooding and storm events.	FWS five-year review (http://ecos.fws.gov/docs/five_year_review/doc3619.pdf)	Disturbance	Yes
33	Athearnia anthonyi	Riversnail, Anthony's	Invertebrate	Mollusk	FWS Region 4: Southeast	AL, GA, TN	4	Is the species or its habitat geographically restricted or confined by natural and/or anthropogenic barriers (e.g. mountain range, isolated soil type, coastal zone or island, or hemmed in by urban development)?	Once widespread in the Tennessee River system the species has been severely restricted by habitat loss and modification and currently it is known from five or perhaps a few more occurrences (3 rivers) in a range extent of less than 250 square km and area of occupancy less than 100 square km	NatureServe	Isolation	No
33	Athearnia anthonyi	Riversnail, Anthony's	Invertebrate	Mollusk	FWS Region 4: Southeast	AL, GA, TN	5	Is the species or its habitat threatened by the spread of invasive or “out of balance” species (e.g. weed, forest pest, novel disease)?			Injurious species	No
33	Athearnia anthonyi	Riversnail, Anthony's	Invertebrate	Mollusk	FWS Region 4: Southeast	AL, GA, TN	6	Is the species sensitive to changes in chemical concentration (e.g. elevated atmospheric CO2, change in water pH, or dissolved oxygen tolerance)?	Species is sensitive to changes in water quality and chemistry.	FWS five-year review (http://ecos.fws.gov/docs/five_year_review/doc3619.pdf)	Chemistry	Yes
33	Athearnia anthonyi	Riversnail, Anthony's	Invertebrate	Mollusk	FWS Region 4: Southeast	AL, GA, TN	7	Does the species rely on particular triggers for life cycle events (breeding, migration, color change) that are likely to become out of sync with seasonal changes in resource availability or environmental conditions (phenologic mismatch)?			Phenology	No
33	Athearnia anthonyi	Riversnail, Anthony's	Invertebrate	Mollusk	FWS Region 4: Southeast	AL, GA, TN	8	Is the species is dependent on one or a few other species (e.g. host, pollinator, dominant food item) and may have limited alternatives if the required species declines due to climate change?			Obligate relationships	No
34	Balaena glacialis	Whale, right	Vertebrate	Mammal	NMFS: Marine	CT, DE, FL, GA, ME, MD, MA, NJ, NY, NC, RI, SC, VA	1	Does the species have specialized thermal tolerance (e.g. pika, trout) or depend on habitat with an important temperature threshold (e.g. sea ice)?			Temperature	No
34	Balaena glacialis	Whale, right	Vertebrate	Mammal	NMFS: Marine	CT, DE, FL, GA, ME, MD, MA, NJ, NY, NC, RI, SC, VA	2	Is the species dependent on habitat with specialized hydrology pattern (e.g. wetland, vernal pool, seasonal streams; sensitivity to drought)?			Hydrology	No
34	Balaena glacialis	Whale, right	Vertebrate	Mammal	NMFS: Marine	CT, DE, FL, GA, ME, MD, MA, NJ, NY, NC, RI, SC, VA	3	Is the species or its habitat sensitive to or dependent upon a certain disturbance regime (e.g. old growth forest, fire-adapted system; seasonal floods)?			Disturbance	No
34	Balaena glacialis	Whale, right	Vertebrate	Mammal	NMFS: Marine	CT, DE, FL, GA, ME, MD, MA, NJ, NY, NC, RI, SC, VA	4	Is the species or its habitat geographically restricted or confined by natural and/or anthropogenic barriers (e.g. mountain range, isolated soil type, coastal zone or island, or hemmed in by urban development)?			Isolation	No
34	Balaena glacialis	Whale, right	Vertebrate	Mammal	NMFS: Marine	CT, DE, FL, GA, ME, MD, MA, NJ, NY, NC, RI, SC, VA	5	Is the species or its habitat threatened by the spread of invasive or “out of balance” species (e.g. weed, forest pest, novel disease)?			Injurious species	No
34	Balaena glacialis	Whale, right	Vertebrate	Mammal	NMFS: Marine	CT, DE, FL, GA, ME, MD, MA, NJ, NY, NC, RI, SC, VA	6	Is the species sensitive to changes in chemical concentration (e.g. elevated atmospheric CO2, change in water pH, or dissolved oxygen tolerance)?			Chemistry	No
34	Balaena glacialis	Whale, right	Vertebrate	Mammal	NMFS: Marine	CT, DE, FL, GA, ME, MD, MA, NJ, NY, NC, RI, SC, VA	7	Does the species rely on particular triggers for life cycle events (breeding, migration, color change) that are likely to become out of sync with seasonal changes in resource availability or environmental conditions (phenologic mismatch)?			Phenology	No
34	Balaena glacialis	Whale, right	Vertebrate	Mammal	NMFS: Marine	CT, DE, FL, GA, ME, MD, MA, NJ, NY, NC, RI, SC, VA	8	Is the species is dependent on one or a few other species (e.g. host, pollinator, dominant food item) and may have limited alternatives if the required species declines due to climate change?	Food availability may be affected by changes in ocean temperatures and resulting changes in physical ocean processes that concentrate prey. "There is a close linkage between right whale foraging and the physical forcing processes that_x000D_ concentrate prey in the oceanic environment. Interannual, decadal, and longer time-scale variability in climate can alter the distribution and biomass of pre…	Species recovery plan (http://ecos.fws.gov/docs/recovery_plan/whale_right_northatlantic.pdf)	Obligate relationships	Yes
35	Balaena mysticetus	Whale, bowhead	Vertebrate	Mammal	NMFS: Marine	AK	1	Does the species have specialized thermal tolerance (e.g. pika, trout) or depend on habitat with an important temperature threshold (e.g. sea ice)?	Species is associated with sea ice through much of the year and may be sensitive to changes in sea ice extent (see note in species vulnerability assessment column), but also may be more sensitive to human disturbances due to loss of sea ice	NOAA species Profile; Laidre et al., 2008: moderately sensitive	Temperature	Yes
35	Balaena mysticetus	Whale, bowhead	Vertebrate	Mammal	NMFS: Marine	AK	2	Is the species dependent on habitat with specialized hydrology pattern (e.g. wetland, vernal pool, seasonal streams; sensitivity to drought)?			Hydrology	No
35	Balaena mysticetus	Whale, bowhead	Vertebrate	Mammal	NMFS: Marine	AK	3	Is the species or its habitat sensitive to or dependent upon a certain disturbance regime (e.g. old growth forest, fire-adapted system; seasonal floods)?			Disturbance	No
35	Balaena mysticetus	Whale, bowhead	Vertebrate	Mammal	NMFS: Marine	AK	4	Is the species or its habitat geographically restricted or confined by natural and/or anthropogenic barriers (e.g. mountain range, isolated soil type, coastal zone or island, or hemmed in by urban development)?			Isolation	No
35	Balaena mysticetus	Whale, bowhead	Vertebrate	Mammal	NMFS: Marine	AK	5	Is the species or its habitat threatened by the spread of invasive or “out of balance” species (e.g. weed, forest pest, novel disease)?			Injurious species	No
35	Balaena mysticetus	Whale, bowhead	Vertebrate	Mammal	NMFS: Marine	AK	6	Is the species sensitive to changes in chemical concentration (e.g. elevated atmospheric CO2, change in water pH, or dissolved oxygen tolerance)?			Chemistry	No
35	Balaena mysticetus	Whale, bowhead	Vertebrate	Mammal	NMFS: Marine	AK	7	Does the species rely on particular triggers for life cycle events (breeding, migration, color change) that are likely to become out of sync with seasonal changes in resource availability or environmental conditions (phenologic mismatch)?			Phenology	No
35	Balaena mysticetus	Whale, bowhead	Vertebrate	Mammal	NMFS: Marine	AK	8	Is the species is dependent on one or a few other species (e.g. host, pollinator, dominant food item) and may have limited alternatives if the required species declines due to climate change?			Obligate relationships	No
36	Balaenoptera borealis	Whale, Sei	Vertebrate	Mammal	NMFS: Marine	CA, MA	1	Does the species have specialized thermal tolerance (e.g. pika, trout) or depend on habitat with an important temperature threshold (e.g. sea ice)?			Temperature	No
36	Balaenoptera borealis	Whale, Sei	Vertebrate	Mammal	NMFS: Marine	CA, MA	2	Is the species dependent on habitat with specialized hydrology pattern (e.g. wetland, vernal pool, seasonal streams; sensitivity to drought)?			Hydrology	No
36	Balaenoptera borealis	Whale, Sei	Vertebrate	Mammal	NMFS: Marine	CA, MA	3	Is the species or its habitat sensitive to or dependent upon a certain disturbance regime (e.g. old growth forest, fire-adapted system; seasonal floods)?			Disturbance	No
36	Balaenoptera borealis	Whale, Sei	Vertebrate	Mammal	NMFS: Marine	CA, MA	4	Is the species or its habitat geographically restricted or confined by natural and/or anthropogenic barriers (e.g. mountain range, isolated soil type, coastal zone or island, or hemmed in by urban development)?			Isolation	No
36	Balaenoptera borealis	Whale, Sei	Vertebrate	Mammal	NMFS: Marine	CA, MA	5	Is the species or its habitat threatened by the spread of invasive or “out of balance” species (e.g. weed, forest pest, novel disease)?			Injurious species	No
36	Balaenoptera borealis	Whale, Sei	Vertebrate	Mammal	NMFS: Marine	CA, MA	6	Is the species sensitive to changes in chemical concentration (e.g. elevated atmospheric CO2, change in water pH, or dissolved oxygen tolerance)?			Chemistry	No
36	Balaenoptera borealis	Whale, Sei	Vertebrate	Mammal	NMFS: Marine	CA, MA	7	Does the species rely on particular triggers for life cycle events (breeding, migration, color change) that are likely to become out of sync with seasonal changes in resource availability or environmental conditions (phenologic mismatch)?	Temperature plays a role in breeding and migration behavior and species may be sensitive to changes in ocean temperatures, but it is unclear exactly how the species would be impacted at this point.	Species recovery plan: https://www.fisheries.noaa.gov/resource/document/final-recovery-plan-sei-whale-balaenoptera-borealis	Phenology	Yes
36	Balaenoptera borealis	Whale, Sei	Vertebrate	Mammal	NMFS: Marine	CA, MA	8	Is the species is dependent on one or a few other species (e.g. host, pollinator, dominant food item) and may have limited alternatives if the required species declines due to climate change?	"Changes to climate and oceanographic processes [related to warming temps] will likely lead to different patterns of prey distribution and availability. Such changes could affect sei whales that are dependent on those affected prey. Recent work has found that copepod distribution has showed signs of shifting in the North Atlantic due to climate changes (Hays et al. 2005)."	Species recovery plan: https://www.fisheries.noaa.gov/resource/document/final-recovery-plan-sei-whale-balaenoptera-borealis	Obligate relationships	Yes
37	Balaenoptera musculus	Whale, blue	Vertebrate	Mammal	NMFS: Marine	AK, CA, MA	1	Does the species have specialized thermal tolerance (e.g. pika, trout) or depend on habitat with an important temperature threshold (e.g. sea ice)?	Blue whales' major food source (krill) is dependent on Antarctic ice habitat. This factor is also listed under food source but I put it here as well because it seems to be so important	WWF report (http://assets.panda.org/downloads/english_final_proof_final.pdf)	Temperature	Yes
37	Balaenoptera musculus	Whale, blue	Vertebrate	Mammal	NMFS: Marine	AK, CA, MA	2	Is the species dependent on habitat with specialized hydrology pattern (e.g. wetland, vernal pool, seasonal streams; sensitivity to drought)?			Hydrology	No
37	Balaenoptera musculus	Whale, blue	Vertebrate	Mammal	NMFS: Marine	AK, CA, MA	3	Is the species or its habitat sensitive to or dependent upon a certain disturbance regime (e.g. old growth forest, fire-adapted system; seasonal floods)?			Disturbance	No
37	Balaenoptera musculus	Whale, blue	Vertebrate	Mammal	NMFS: Marine	AK, CA, MA	4	Is the species or its habitat geographically restricted or confined by natural and/or anthropogenic barriers (e.g. mountain range, isolated soil type, coastal zone or island, or hemmed in by urban development)?			Isolation	No
37	Balaenoptera musculus	Whale, blue	Vertebrate	Mammal	NMFS: Marine	AK, CA, MA	5	Is the species or its habitat threatened by the spread of invasive or “out of balance” species (e.g. weed, forest pest, novel disease)?			Injurious species	No
37	Balaenoptera musculus	Whale, blue	Vertebrate	Mammal	NMFS: Marine	AK, CA, MA	6	Is the species sensitive to changes in chemical concentration (e.g. elevated atmospheric CO2, change in water pH, or dissolved oxygen tolerance)?			Chemistry	No
37	Balaenoptera musculus	Whale, blue	Vertebrate	Mammal	NMFS: Marine	AK, CA, MA	7	Does the species rely on particular triggers for life cycle events (breeding, migration, color change) that are likely to become out of sync with seasonal changes in resource availability or environmental conditions (phenologic mismatch)?			Phenology	No
37	Balaenoptera musculus	Whale, blue	Vertebrate	Mammal	NMFS: Marine	AK, CA, MA	8	Is the species is dependent on one or a few other species (e.g. host, pollinator, dominant food item) and may have limited alternatives if the required species declines due to climate change?	Species is dependent on krill which will be affected by loss of arctic sea ice. Blue whale is expected to have to travel about 600 miles farther south to reach the food-rich areas. Whales would need more energy for the longer migration journeys and it would reduce the length of the main feeding season.	WWF report (http://assets.panda.org/downloads/english_final_proof_final.pdf)	Obligate relationships	Yes
38	Balaenoptera physalus	Whale, finback	Vertebrate	Mammal	NMFS: Marine	AL, AK, CA, CT, DE, FL, GA, LA, ME, MD, MA, MS, NH, NJ, NY, NC, PR, RI, SC, VA, VI	1	Does the species have specialized thermal tolerance (e.g. pika, trout) or depend on habitat with an important temperature threshold (e.g. sea ice)?	"Site selection for whale migration, feeding, and breeding for fin whales, may be influenced by factors such as ocean currents and water temperature. Any changes in these factors could render currently used habitat areas unsuitable."	Species recovery plan: https://www.fisheries.noaa.gov/resource/document/final-recovery-plan-fin-whale-balaenoptera-physalus	Temperature	Yes
38	Balaenoptera physalus	Whale, finback	Vertebrate	Mammal	NMFS: Marine	AL, AK, CA, CT, DE, FL, GA, LA, ME, MD, MA, MS, NH, NJ, NY, NC, PR, RI, SC, VA, VI	2	Is the species dependent on habitat with specialized hydrology pattern (e.g. wetland, vernal pool, seasonal streams; sensitivity to drought)?			Hydrology	No
38	Balaenoptera physalus	Whale, finback	Vertebrate	Mammal	NMFS: Marine	AL, AK, CA, CT, DE, FL, GA, LA, ME, MD, MA, MS, NH, NJ, NY, NC, PR, RI, SC, VA, VI	3	Is the species or its habitat sensitive to or dependent upon a certain disturbance regime (e.g. old growth forest, fire-adapted system; seasonal floods)?			Disturbance	No
38	Balaenoptera physalus	Whale, finback	Vertebrate	Mammal	NMFS: Marine	AL, AK, CA, CT, DE, FL, GA, LA, ME, MD, MA, MS, NH, NJ, NY, NC, PR, RI, SC, VA, VI	4	Is the species or its habitat geographically restricted or confined by natural and/or anthropogenic barriers (e.g. mountain range, isolated soil type, coastal zone or island, or hemmed in by urban development)?			Isolation	No
38	Balaenoptera physalus	Whale, finback	Vertebrate	Mammal	NMFS: Marine	AL, AK, CA, CT, DE, FL, GA, LA, ME, MD, MA, MS, NH, NJ, NY, NC, PR, RI, SC, VA, VI	5	Is the species or its habitat threatened by the spread of invasive or “out of balance” species (e.g. weed, forest pest, novel disease)?			Injurious species	No
38	Balaenoptera physalus	Whale, finback	Vertebrate	Mammal	NMFS: Marine	AL, AK, CA, CT, DE, FL, GA, LA, ME, MD, MA, MS, NH, NJ, NY, NC, PR, RI, SC, VA, VI	6	Is the species sensitive to changes in chemical concentration (e.g. elevated atmospheric CO2, change in water pH, or dissolved oxygen tolerance)?			Chemistry	No
38	Balaenoptera physalus	Whale, finback	Vertebrate	Mammal	NMFS: Marine	AL, AK, CA, CT, DE, FL, GA, LA, ME, MD, MA, MS, NH, NJ, NY, NC, PR, RI, SC, VA, VI	7	Does the species rely on particular triggers for life cycle events (breeding, migration, color change) that are likely to become out of sync with seasonal changes in resource availability or environmental conditions (phenologic mismatch)?			Phenology	No
38	Balaenoptera physalus	Whale, finback	Vertebrate	Mammal	NMFS: Marine	AL, AK, CA, CT, DE, FL, GA, LA, ME, MD, MA, MS, NH, NJ, NY, NC, PR, RI, SC, VA, VI	8	Is the species is dependent on one or a few other species (e.g. host, pollinator, dominant food item) and may have limited alternatives if the required species declines due to climate change?	"Changes to climate and oceanographic processes may also lead to decreased productivity in different patterns of prey distribution and availability. Such changes could affect fin whales that are dependent on those affected prey. Recent work has found that copepod distribution has showed signs of shifting in the North Atlantic due to climate changes." "The feeding range of fin whales is larger tha…	Species recovery plan (http://www.nmfs.noaa.gov/pr/pdfs/recovery/finwhale.pdf)	Obligate relationships	Yes
39	Batrachoseps aridus	Salamander, desert slender	Vertebrate	Amphibian	FWS Region 8: Pacific Southwest	CA	1	Does the species have specialized thermal tolerance (e.g. pika, trout) or depend on habitat with an important temperature threshold (e.g. sea ice)?			Temperature	No
39	Batrachoseps aridus	Salamander, desert slender	Vertebrate	Amphibian	FWS Region 8: Pacific Southwest	CA	2	Is the species dependent on habitat with specialized hydrology pattern (e.g. wetland, vernal pool, seasonal streams; sensitivity to drought)?	"The extant populations are relictual, resulting from a change to a drier climate." Increasingly severe and frequent droughts in S.CA may harm remnant occurances.	Natureserve	Hydrology	Yes
39	Batrachoseps aridus	Salamander, desert slender	Vertebrate	Amphibian	FWS Region 8: Pacific Southwest	CA	3	Is the species or its habitat sensitive to or dependent upon a certain disturbance regime (e.g. old growth forest, fire-adapted system; seasonal floods)?	Flash floods threaten habitat. "A 1976 storm washed out an estimated 25 percent of the habitat" at the Hidden Palm site.	five-year review (http://www.fws.gov/carlsbad/speciesStatusList/5YR/20090617_5YR_DSS.pdf)	Disturbance	Yes
39	Batrachoseps aridus	Salamander, desert slender	Vertebrate	Amphibian	FWS Region 8: Pacific Southwest	CA	4	Is the species or its habitat geographically restricted or confined by natural and/or anthropogenic barriers (e.g. mountain range, isolated soil type, coastal zone or island, or hemmed in by urban development)?	"Two known localities: an area of less than one acre in Hidden Palm Canyon, at around 2,800 ft (850 m). . . and nearby Guadalupe Canyon."	Natureserve	Isolation	Yes
39	Batrachoseps aridus	Salamander, desert slender	Vertebrate	Amphibian	FWS Region 8: Pacific Southwest	CA	5	Is the species or its habitat threatened by the spread of invasive or “out of balance” species (e.g. weed, forest pest, novel disease)?	"The potential occurrence and effect of this fungus on salamander populations is poorly known, but salamanders can become infected (Davidson et al. 2003, p. 1) and chytridimycosis has been implicated in salamander declines elsewhere (Bosch and Martinez-Solano 2006, p. 1). This disease could devastate the small population(s) of desert slender salamanders."	five-year review (http://www.fws.gov/carlsbad/speciesStatusList/5YR/20090617_5YR_DSS.pdf)	Injurious species	Yes
39	Batrachoseps aridus	Salamander, desert slender	Vertebrate	Amphibian	FWS Region 8: Pacific Southwest	CA	6	Is the species sensitive to changes in chemical concentration (e.g. elevated atmospheric CO2, change in water pH, or dissolved oxygen tolerance)?			Chemistry	No
39	Batrachoseps aridus	Salamander, desert slender	Vertebrate	Amphibian	FWS Region 8: Pacific Southwest	CA	7	Does the species rely on particular triggers for life cycle events (breeding, migration, color change) that are likely to become out of sync with seasonal changes in resource availability or environmental conditions (phenologic mismatch)?			Phenology	No
39	Batrachoseps aridus	Salamander, desert slender	Vertebrate	Amphibian	FWS Region 8: Pacific Southwest	CA	8	Is the species is dependent on one or a few other species (e.g. host, pollinator, dominant food item) and may have limited alternatives if the required species declines due to climate change?			Obligate relationships	No
40	Batrisodes texanus	Beetle, Coffin Cave mold	Invertebrate	Arthropod	FWS Region 2: Southwest	TX	1	Does the species have specialized thermal tolerance (e.g. pika, trout) or depend on habitat with an important temperature threshold (e.g. sea ice)?	Species is used to stable temperatures within its habitat and may be sensitive to changes in temp. "Within this [troglobitic] habitat this species depends on high humidity, stable_x000D_ temperatures, and nutrients derived from the surface."	FWS five-year review (http://ecos.fws.gov/docs/five_year_review/doc3017.pdf)	Temperature	Yes
40	Batrisodes texanus	Beetle, Coffin Cave mold	Invertebrate	Arthropod	FWS Region 2: Southwest	TX	2	Is the species dependent on habitat with specialized hydrology pattern (e.g. wetland, vernal pool, seasonal streams; sensitivity to drought)?	Cave habitat is dependent on specific moisture regime and infiltration by water. Too much is a problem and too little is also a problem. Changes in rainfall amounts will also affect nutrients washed into cave which the species depends on. "Within this [troglobitic] habitat this species depends on high humidity, stable temperatures, and nutrients derived from the surface."	FWS five-year review (http://ecos.fws.gov/docs/five_year_review/doc3017.pdf)	Hydrology	Yes
40	Batrisodes texanus	Beetle, Coffin Cave mold	Invertebrate	Arthropod	FWS Region 2: Southwest	TX	3	Is the species or its habitat sensitive to or dependent upon a certain disturbance regime (e.g. old growth forest, fire-adapted system; seasonal floods)?			Disturbance	No
40	Batrisodes texanus	Beetle, Coffin Cave mold	Invertebrate	Arthropod	FWS Region 2: Southwest	TX	4	Is the species or its habitat geographically restricted or confined by natural and/or anthropogenic barriers (e.g. mountain range, isolated soil type, coastal zone or island, or hemmed in by urban development)?	" <100-250 square km (less than about 40-100 square miles). Found in Coffin Cave and a few localities to the south of Coffin Cave in the Edwards Plateau area, Williamson County, Texas (USFWS, 1993; 1994; Chandler et al., 2009)."	NatureServe	Isolation	Yes
40	Batrisodes texanus	Beetle, Coffin Cave mold	Invertebrate	Arthropod	FWS Region 2: Southwest	TX	5	Is the species or its habitat threatened by the spread of invasive or “out of balance” species (e.g. weed, forest pest, novel disease)?	Red fire ant may respond positively to climate change and continue to expand its range	http://onlinelibrary.wiley.com/doi/10.1111/j.1366-9516.2005.00142.x/abstract	Injurious species	Yes
40	Batrisodes texanus	Beetle, Coffin Cave mold	Invertebrate	Arthropod	FWS Region 2: Southwest	TX	6	Is the species sensitive to changes in chemical concentration (e.g. elevated atmospheric CO2, change in water pH, or dissolved oxygen tolerance)?			Chemistry	No
40	Batrisodes texanus	Beetle, Coffin Cave mold	Invertebrate	Arthropod	FWS Region 2: Southwest	TX	7	Does the species rely on particular triggers for life cycle events (breeding, migration, color change) that are likely to become out of sync with seasonal changes in resource availability or environmental conditions (phenologic mismatch)?			Phenology	No
40	Batrisodes texanus	Beetle, Coffin Cave mold	Invertebrate	Arthropod	FWS Region 2: Southwest	TX	8	Is the species is dependent on one or a few other species (e.g. host, pollinator, dominant food item) and may have limited alternatives if the required species declines due to climate change?			Obligate relationships	No
41	Batrisodes venyivi	Beetle, Helotes mold	Invertebrate	Arthropod	FWS Region 2: Southwest	TX	1	Does the species have specialized thermal tolerance (e.g. pika, trout) or depend on habitat with an important temperature threshold (e.g. sea ice)?	"Cave organisms are adapted to live in a narrow range of temperature, humidity, and nutrients that are washed into caves."	Bexar County Karst Invertebrates recovery plan (http://ecos.fws.gov/docs/recovery_plan/Final%202001%20Bexar%20Co%20Invertebrates%20Rec%20Plan_1.pdf)	Temperature	Yes
41	Batrisodes venyivi	Beetle, Helotes mold	Invertebrate	Arthropod	FWS Region 2: Southwest	TX	2	Is the species dependent on habitat with specialized hydrology pattern (e.g. wetland, vernal pool, seasonal streams; sensitivity to drought)?	"Cave organisms are adapted to live in a narrow range of temperature, humidity, and nutrients that are washed into caves."	Bexar County Karst Invertebrates recovery plan (http://ecos.fws.gov/docs/recovery_plan/Final%202001%20Bexar%20Co%20Invertebrates%20Rec%20Plan_1.pdf)	Hydrology	Yes
41	Batrisodes venyivi	Beetle, Helotes mold	Invertebrate	Arthropod	FWS Region 2: Southwest	TX	3	Is the species or its habitat sensitive to or dependent upon a certain disturbance regime (e.g. old growth forest, fire-adapted system; seasonal floods)?	Increased severe weather and storms may lead to cave filling and disturbance: "Altering the quantity or timing of water input to the karst ecosystem, or its organic content, may negatively impact the listed species."	Bexar County Karst Invertebrates recovery plan (http://ecos.fws.gov/docs/recovery_plan/Final%202001%20Bexar%20Co%20Invertebrates%20Rec%20Plan_1.pdf)	Disturbance	Yes
41	Batrisodes venyivi	Beetle, Helotes mold	Invertebrate	Arthropod	FWS Region 2: Southwest	TX	4	Is the species or its habitat geographically restricted or confined by natural and/or anthropogenic barriers (e.g. mountain range, isolated soil type, coastal zone or island, or hemmed in by urban development)?	Species is known in 8 caves within texas	NatureServe Explorer	Isolation	Yes
41	Batrisodes venyivi	Beetle, Helotes mold	Invertebrate	Arthropod	FWS Region 2: Southwest	TX	5	Is the species or its habitat threatened by the spread of invasive or “out of balance” species (e.g. weed, forest pest, novel disease)?	Species is threatened by fire ants which are expected to respond to climate change with range expansions	Bexar County Karst Invertebrates recovery plan (http://ecos.fws.gov/docs/recovery_plan/Final%202001%20Bexar%20Co%20Invertebrates%20Rec%20Plan_1.pdf), http://onlinelibrary.wiley.com/doi/10.1111/j.1366-9516.2005.00142.x/abstract	Injurious species	Yes
41	Batrisodes venyivi	Beetle, Helotes mold	Invertebrate	Arthropod	FWS Region 2: Southwest	TX	6	Is the species sensitive to changes in chemical concentration (e.g. elevated atmospheric CO2, change in water pH, or dissolved oxygen tolerance)?			Chemistry	No
41	Batrisodes venyivi	Beetle, Helotes mold	Invertebrate	Arthropod	FWS Region 2: Southwest	TX	7	Does the species rely on particular triggers for life cycle events (breeding, migration, color change) that are likely to become out of sync with seasonal changes in resource availability or environmental conditions (phenologic mismatch)?			Phenology	No
41	Batrisodes venyivi	Beetle, Helotes mold	Invertebrate	Arthropod	FWS Region 2: Southwest	TX	8	Is the species is dependent on one or a few other species (e.g. host, pollinator, dominant food item) and may have limited alternatives if the required species declines due to climate change?			Obligate relationships	No
42	Boloria acrocnema	Butterfly, Uncompahgre fritillary	Invertebrate	Arthropod	FWS Region 6: Mountain Prairie	CO	1	Does the species have specialized thermal tolerance (e.g. pika, trout) or depend on habitat with an important temperature threshold (e.g. sea ice)?	Alpine. "Because the UFB is restricted to a range of 12,100 to 13,500 feet (Ellingson 2003), climate change could restrict the UFB’s habitat to a zone so narrow that the species would be unable to survive. _x000D_ Britten and Brussard (1992) believe that the UFB is a “glacial relict,” or a species that was more widespread during or shortly after the last glacial period, but with temperature incre…	five-year review (http://ecos.fws.gov/docs/five_year_review/doc3072.pdf)	Temperature	Yes
42	Boloria acrocnema	Butterfly, Uncompahgre fritillary	Invertebrate	Arthropod	FWS Region 6: Mountain Prairie	CO	2	Is the species dependent on habitat with specialized hydrology pattern (e.g. wetland, vernal pool, seasonal streams; sensitivity to drought)?	Species is found on north- and east-facing slopes which provide a wetter and cooler microclimate	Natureserve	Hydrology	Yes
42	Boloria acrocnema	Butterfly, Uncompahgre fritillary	Invertebrate	Arthropod	FWS Region 6: Mountain Prairie	CO	3	Is the species or its habitat sensitive to or dependent upon a certain disturbance regime (e.g. old growth forest, fire-adapted system; seasonal floods)?			Disturbance	No
42	Boloria acrocnema	Butterfly, Uncompahgre fritillary	Invertebrate	Arthropod	FWS Region 6: Mountain Prairie	CO	4	Is the species or its habitat geographically restricted or confined by natural and/or anthropogenic barriers (e.g. mountain range, isolated soil type, coastal zone or island, or hemmed in by urban development)?	Species restricted to higher elevations and low-elevation habitat in between may represent a dispersal barrier.	five-year review (http://ecos.fws.gov/docs/five_year_review/doc3072.pdf)	Isolation	Yes
42	Boloria acrocnema	Butterfly, Uncompahgre fritillary	Invertebrate	Arthropod	FWS Region 6: Mountain Prairie	CO	5	Is the species or its habitat threatened by the spread of invasive or “out of balance” species (e.g. weed, forest pest, novel disease)?			Injurious species	No
42	Boloria acrocnema	Butterfly, Uncompahgre fritillary	Invertebrate	Arthropod	FWS Region 6: Mountain Prairie	CO	6	Is the species sensitive to changes in chemical concentration (e.g. elevated atmospheric CO2, change in water pH, or dissolved oxygen tolerance)?			Chemistry	No
42	Boloria acrocnema	Butterfly, Uncompahgre fritillary	Invertebrate	Arthropod	FWS Region 6: Mountain Prairie	CO	7	Does the species rely on particular triggers for life cycle events (breeding, migration, color change) that are likely to become out of sync with seasonal changes in resource availability or environmental conditions (phenologic mismatch)?			Phenology	No
42	Boloria acrocnema	Butterfly, Uncompahgre fritillary	Invertebrate	Arthropod	FWS Region 6: Mountain Prairie	CO	8	Is the species is dependent on one or a few other species (e.g. host, pollinator, dominant food item) and may have limited alternatives if the required species declines due to climate change?	Snow willow is the obligate larval food plant.	Natureserve	Obligate relationships	Yes
43	Bombus affinis	Rusty patched bumble bee	Invertebrate	Arthropod	FWS Region 3: Midwest	IA, IL, IN, MA, ME, MN, OH, VA, WI, WV	1	Does the species have specialized thermal tolerance (e.g. pika, trout) or depend on habitat with an important temperature threshold (e.g. sea ice)?	"Rusty patched bumble bees live in temperate climates, and are not likely to survive prolonged periods of high temperatures (over 35 °Celsius (C) (95 °F (F)) (Goulson 2016, pers. comm.)."	listing decision: https://www.gpo.gov/fdsys/pkg/FR-2017-01-11/pdf/2017-00195.pdf	Temperature	Yes
43	Bombus affinis	Rusty patched bumble bee	Invertebrate	Arthropod	FWS Region 3: Midwest	IA, IL, IN, MA, ME, MN, OH, VA, WI, WV	2	Is the species dependent on habitat with specialized hydrology pattern (e.g. wetland, vernal pool, seasonal streams; sensitivity to drought)?		listing decision: https://www.gpo.gov/fdsys/pkg/FR-2017-01-11/pdf/2017-00195.pdf	Hydrology	No
43	Bombus affinis	Rusty patched bumble bee	Invertebrate	Arthropod	FWS Region 3: Midwest	IA, IL, IN, MA, ME, MN, OH, VA, WI, WV	3	Is the species or its habitat sensitive to or dependent upon a certain disturbance regime (e.g. old growth forest, fire-adapted system; seasonal floods)?		listing decision: https://www.gpo.gov/fdsys/pkg/FR-2017-01-11/pdf/2017-00195.pdf	Disturbance	No
43	Bombus affinis	Rusty patched bumble bee	Invertebrate	Arthropod	FWS Region 3: Midwest	IA, IL, IN, MA, ME, MN, OH, VA, WI, WV	4	Is the species or its habitat geographically restricted or confined by natural and/or anthropogenic barriers (e.g. mountain range, isolated soil type, coastal zone or island, or hemmed in by urban development)?	Original distribution broad and forages in multple habitats	listing decision: https://www.gpo.gov/fdsys/pkg/FR-2017-01-11/pdf/2017-00195.pdf	Isolation	No
43	Bombus affinis	Rusty patched bumble bee	Invertebrate	Arthropod	FWS Region 3: Midwest	IA, IL, IN, MA, ME, MN, OH, VA, WI, WV	5	Is the species or its habitat threatened by the spread of invasive or “out of balance” species (e.g. weed, forest pest, novel disease)?	Possible impact from Nosema bombi fungus and/or other pathogens; not clear.	listing decision: https://www.gpo.gov/fdsys/pkg/FR-2017-01-11/pdf/2017-00195.pdf	Injurious species	Unknown
43	Bombus affinis	Rusty patched bumble bee	Invertebrate	Arthropod	FWS Region 3: Midwest	IA, IL, IN, MA, ME, MN, OH, VA, WI, WV	6	Is the species sensitive to changes in chemical concentration (e.g. elevated atmospheric CO2, change in water pH, or dissolved oxygen tolerance)?		listing decision: https://www.gpo.gov/fdsys/pkg/FR-2017-01-11/pdf/2017-00195.pdf	Chemistry	No
43	Bombus affinis	Rusty patched bumble bee	Invertebrate	Arthropod	FWS Region 3: Midwest	IA, IL, IN, MA, ME, MN, OH, VA, WI, WV	7	Does the species rely on particular triggers for life cycle events (breeding, migration, color change) that are likely to become out of sync with seasonal changes in resource availability or environmental conditions (phenologic mismatch)?	Has long active season (early spring to late fall), needs flowers in bloom for entire time.	listing decision: https://www.gpo.gov/fdsys/pkg/FR-2017-01-11/pdf/2017-00195.pdf	Phenology	Yes
43	Bombus affinis	Rusty patched bumble bee	Invertebrate	Arthropod	FWS Region 3: Midwest	IA, IL, IN, MA, ME, MN, OH, VA, WI, WV	8	Is the species is dependent on one or a few other species (e.g. host, pollinator, dominant food item) and may have limited alternatives if the required species declines due to climate change?	Requires nectar flowers, but forages in a variety of habitats; generalist forager. Nests in disused rodent burrows, but not apparently species specific	listing decision: https://www.gpo.gov/fdsys/pkg/FR-2017-01-11/pdf/2017-00195.pdf	Obligate relationships	No
44	Brachylagus idahoensis	Rabbit, pygmy	Vertebrate	Mammal	FWS Region 1: Pacific	WA	1	Does the species have specialized thermal tolerance (e.g. pika, trout) or depend on habitat with an important temperature threshold (e.g. sea ice)?			Temperature	No
44	Brachylagus idahoensis	Rabbit, pygmy	Vertebrate	Mammal	FWS Region 1: Pacific	WA	2	Is the species dependent on habitat with specialized hydrology pattern (e.g. wetland, vernal pool, seasonal streams; sensitivity to drought)?			Hydrology	No
44	Brachylagus idahoensis	Rabbit, pygmy	Vertebrate	Mammal	FWS Region 1: Pacific	WA	3	Is the species or its habitat sensitive to or dependent upon a certain disturbance regime (e.g. old growth forest, fire-adapted system; seasonal floods)?	Sensitive to changes in fire frequency/intensity.	Natureserve	Disturbance	Yes
44	Brachylagus idahoensis	Rabbit, pygmy	Vertebrate	Mammal	FWS Region 1: Pacific	WA	4	Is the species or its habitat geographically restricted or confined by natural and/or anthropogenic barriers (e.g. mountain range, isolated soil type, coastal zone or island, or hemmed in by urban development)?			Isolation	No
44	Brachylagus idahoensis	Rabbit, pygmy	Vertebrate	Mammal	FWS Region 1: Pacific	WA	5	Is the species or its habitat threatened by the spread of invasive or “out of balance” species (e.g. weed, forest pest, novel disease)?	"Under current climate-change projections, further invasion by Bromus tectorum into sagebrush habitat is likely to occur, as is invasion by woody species, and fire frequency (as well as extent and severity) likely will continue to increase. Climate change is thus likely to exacerbate the existing primary threats such as frequent wildfire and invasive nonnative plants, particularly B. tectorum."	Natureserve	Injurious species	Yes
44	Brachylagus idahoensis	Rabbit, pygmy	Vertebrate	Mammal	FWS Region 1: Pacific	WA	6	Is the species sensitive to changes in chemical concentration (e.g. elevated atmospheric CO2, change in water pH, or dissolved oxygen tolerance)?			Chemistry	No
44	Brachylagus idahoensis	Rabbit, pygmy	Vertebrate	Mammal	FWS Region 1: Pacific	WA	7	Does the species rely on particular triggers for life cycle events (breeding, migration, color change) that are likely to become out of sync with seasonal changes in resource availability or environmental conditions (phenologic mismatch)?			Phenology	No
44	Brachylagus idahoensis	Rabbit, pygmy	Vertebrate	Mammal	FWS Region 1: Pacific	WA	8	Is the species is dependent on one or a few other species (e.g. host, pollinator, dominant food item) and may have limited alternatives if the required species declines due to climate change?	"Sagebrush cover is critical to pygmy rabbits; sagebrush eradication is detrimental (Holochek 1981). Fragmentation of sagebrush communities also poses a threat to populations of pygmy rabbits (Weiss and Verts 1984) because dispersal potantial is limited." Also sagebrush is the dominant food item.	Natureserve	Obligate relationships	Yes
45	Branchinecta conservatio	Fairy shrimp, Conservancy	Invertebrate	Arthropod	FWS Region 8: Pacific Southwest	CA	1	Does the species have specialized thermal tolerance (e.g. pika, trout) or depend on habitat with an important temperature threshold (e.g. sea ice)?	"Drought-mediated decreases in water depth and inundation period could increase the frequency at which pools dry before shrimp have completed their life cycle, or cause pool temperatures to more often exceed temperatures suitable for hatching and persistence of the species." Even with sufficient water, higher temperatures may exceed the species' upper thermal tolerance.	five-year review (http://www.fws.gov/cno/es/images/conservancy%20fs_five-yearreview%20cno%20final%2027sept07.pdf)	Temperature	Yes
45	Branchinecta conservatio	Fairy shrimp, Conservancy	Invertebrate	Arthropod	FWS Region 8: Pacific Southwest	CA	2	Is the species dependent on habitat with specialized hydrology pattern (e.g. wetland, vernal pool, seasonal streams; sensitivity to drought)?	Vernal pool species. "It is ecologically dependent on the presence or absence and duration of water during specific times of the year, as well as water chemistry (USFWS, 1992)."	Natureserve	Hydrology	Yes
45	Branchinecta conservatio	Fairy shrimp, Conservancy	Invertebrate	Arthropod	FWS Region 8: Pacific Southwest	CA	3	Is the species or its habitat sensitive to or dependent upon a certain disturbance regime (e.g. old growth forest, fire-adapted system; seasonal floods)?	"It is likely that the lack of fires, coupled with the lack of adequate grazing, has increased the densities of non-native herbaceous vegetation surrounding vernal pools, degrading the habitat (Wells et al., 1997)."	Natureserve	Disturbance	Yes
45	Branchinecta conservatio	Fairy shrimp, Conservancy	Invertebrate	Arthropod	FWS Region 8: Pacific Southwest	CA	4	Is the species or its habitat geographically restricted or confined by natural and/or anthropogenic barriers (e.g. mountain range, isolated soil type, coastal zone or island, or hemmed in by urban development)?	Restricted to vernal pools in the CA Central Valley.	Natureserve	Isolation	Yes
45	Branchinecta conservatio	Fairy shrimp, Conservancy	Invertebrate	Arthropod	FWS Region 8: Pacific Southwest	CA	5	Is the species or its habitat threatened by the spread of invasive or “out of balance” species (e.g. weed, forest pest, novel disease)?	"Non-native herbaceous species occur commonly in vernal pool complexes and have become a threat to native vernal pool species through their capacity to change pool hydrology (Marty, 2005)."	Natureserve	Injurious species	Yes
45	Branchinecta conservatio	Fairy shrimp, Conservancy	Invertebrate	Arthropod	FWS Region 8: Pacific Southwest	CA	6	Is the species sensitive to changes in chemical concentration (e.g. elevated atmospheric CO2, change in water pH, or dissolved oxygen tolerance)?			Chemistry	No
45	Branchinecta conservatio	Fairy shrimp, Conservancy	Invertebrate	Arthropod	FWS Region 8: Pacific Southwest	CA	7	Does the species rely on particular triggers for life cycle events (breeding, migration, color change) that are likely to become out of sync with seasonal changes in resource availability or environmental conditions (phenologic mismatch)?	"Inhabits turbid, slightly alkaline, large, deep, vernal pools and winter lakes in California grassland areas. Eng et al. (1990) reports that all pools were filled with winter and spring rains and lasted into June."	Natureserve	Phenology	Yes
45	Branchinecta conservatio	Fairy shrimp, Conservancy	Invertebrate	Arthropod	FWS Region 8: Pacific Southwest	CA	8	Is the species is dependent on one or a few other species (e.g. host, pollinator, dominant food item) and may have limited alternatives if the required species declines due to climate change?			Obligate relationships	No
46	Branchinecta longiantenna	Fairy shrimp, longhorn	Invertebrate	Arthropod	FWS Region 8: Pacific Southwest	CA	1	Does the species have specialized thermal tolerance (e.g. pika, trout) or depend on habitat with an important temperature threshold (e.g. sea ice)?			Temperature	No
46	Branchinecta longiantenna	Fairy shrimp, longhorn	Invertebrate	Arthropod	FWS Region 8: Pacific Southwest	CA	2	Is the species dependent on habitat with specialized hydrology pattern (e.g. wetland, vernal pool, seasonal streams; sensitivity to drought)?	Requires vernal pools. "Drought is likely to decrease or terminate reproductive output as pools fail to flood, or dry up before reproduction is complete, and prolonged droughts over several successive years could extirpate particular localities or entire populations."	Natureserve	Hydrology	Yes
46	Branchinecta longiantenna	Fairy shrimp, longhorn	Invertebrate	Arthropod	FWS Region 8: Pacific Southwest	CA	3	Is the species or its habitat sensitive to or dependent upon a certain disturbance regime (e.g. old growth forest, fire-adapted system; seasonal floods)?			Disturbance	No
46	Branchinecta longiantenna	Fairy shrimp, longhorn	Invertebrate	Arthropod	FWS Region 8: Pacific Southwest	CA	4	Is the species or its habitat geographically restricted or confined by natural and/or anthropogenic barriers (e.g. mountain range, isolated soil type, coastal zone or island, or hemmed in by urban development)?	"Endemic to the Central Coastal Range in California. It is discontinuously distributed along a 335 km stretch between Concord, Contra Costa County, south to the Carrizo Plain in San Luis Obispo County."	Natureserve	Isolation	Yes
46	Branchinecta longiantenna	Fairy shrimp, longhorn	Invertebrate	Arthropod	FWS Region 8: Pacific Southwest	CA	5	Is the species or its habitat threatened by the spread of invasive or “out of balance” species (e.g. weed, forest pest, novel disease)?	"Nonnative herbaceous species occur commonly in vernal pool complexes and have become a threat to native vernal pool species through their capacity to change pool hydrology (Marty, 2005)."	Natureserve	Injurious species	Yes
46	Branchinecta longiantenna	Fairy shrimp, longhorn	Invertebrate	Arthropod	FWS Region 8: Pacific Southwest	CA	6	Is the species sensitive to changes in chemical concentration (e.g. elevated atmospheric CO2, change in water pH, or dissolved oxygen tolerance)?	Its sandstone pool habitats "have a pH near neutral, and very low alkalinity and conductivity (Eriksen and Belk 1999)."	recovery plan (http://www.fws.gov/sacramento/es/Recovery-Planning/Vernal-Pool/Documents/longhorn_fairy_shrimp.pdf)	Chemistry	Yes
46	Branchinecta longiantenna	Fairy shrimp, longhorn	Invertebrate	Arthropod	FWS Region 8: Pacific Southwest	CA	7	Does the species rely on particular triggers for life cycle events (breeding, migration, color change) that are likely to become out of sync with seasonal changes in resource availability or environmental conditions (phenologic mismatch)?	The eggs hatch when the vernal pools and swales fill with rainwater and the immature stages rapidly develop into adults.	recovery plan (http://www.fws.gov/sacramento/es/Recovery-Planning/Vernal-Pool/Documents/longhorn_fairy_shrimp.pdf)	Phenology	Yes
46	Branchinecta longiantenna	Fairy shrimp, longhorn	Invertebrate	Arthropod	FWS Region 8: Pacific Southwest	CA	8	Is the species is dependent on one or a few other species (e.g. host, pollinator, dominant food item) and may have limited alternatives if the required species declines due to climate change?			Obligate relationships	No
47	Branchinecta sandiegonensis	Fairy shrimp, San Diego	Invertebrate	Arthropod	FWS Region 8: Pacific Southwest	CA	1	Does the species have specialized thermal tolerance (e.g. pika, trout) or depend on habitat with an important temperature threshold (e.g. sea ice)?			Temperature	No
47	Branchinecta sandiegonensis	Fairy shrimp, San Diego	Invertebrate	Arthropod	FWS Region 8: Pacific Southwest	CA	2	Is the species dependent on habitat with specialized hydrology pattern (e.g. wetland, vernal pool, seasonal streams; sensitivity to drought)?	Requires vernal pools.	Natureserve	Hydrology	Yes
47	Branchinecta sandiegonensis	Fairy shrimp, San Diego	Invertebrate	Arthropod	FWS Region 8: Pacific Southwest	CA	3	Is the species or its habitat sensitive to or dependent upon a certain disturbance regime (e.g. old growth forest, fire-adapted system; seasonal floods)?			Disturbance	No
47	Branchinecta sandiegonensis	Fairy shrimp, San Diego	Invertebrate	Arthropod	FWS Region 8: Pacific Southwest	CA	4	Is the species or its habitat geographically restricted or confined by natural and/or anthropogenic barriers (e.g. mountain range, isolated soil type, coastal zone or island, or hemmed in by urban development)?	Limited to the southern California coastal mesa system, an area with significant pressure from urban and industrial development. "91 hectares of occupied habitat remains (FWS, 2003)." "Is present in fewer than 70 vernal pools within 11 vernal pool complexes in San Diego County (USFWS, 1994)."	Natureserve	Isolation	Yes
47	Branchinecta sandiegonensis	Fairy shrimp, San Diego	Invertebrate	Arthropod	FWS Region 8: Pacific Southwest	CA	5	Is the species or its habitat threatened by the spread of invasive or “out of balance” species (e.g. weed, forest pest, novel disease)?	"Another threat is invasion by non-native plants including two nonnative wetland grasses: Agrostis avenacea (Pacific bentgrass) and Polypogon monspeliensis (annual rabbits foot grass)."	Natureserve	Injurious species	Yes
47	Branchinecta sandiegonensis	Fairy shrimp, San Diego	Invertebrate	Arthropod	FWS Region 8: Pacific Southwest	CA	6	Is the species sensitive to changes in chemical concentration (e.g. elevated atmospheric CO2, change in water pH, or dissolved oxygen tolerance)?			Chemistry	No
47	Branchinecta sandiegonensis	Fairy shrimp, San Diego	Invertebrate	Arthropod	FWS Region 8: Pacific Southwest	CA	7	Does the species rely on particular triggers for life cycle events (breeding, migration, color change) that are likely to become out of sync with seasonal changes in resource availability or environmental conditions (phenologic mismatch)?	"Adults observed from January to March, however, in years with early or large rainfall, the hatching period may be extended." This was not included in previous fairy shrimp reproductive section and this flexibility may indicate reduced risk phenologic mismatch.	Natureserve	Phenology	No
47	Branchinecta sandiegonensis	Fairy shrimp, San Diego	Invertebrate	Arthropod	FWS Region 8: Pacific Southwest	CA	8	Is the species is dependent on one or a few other species (e.g. host, pollinator, dominant food item) and may have limited alternatives if the required species declines due to climate change?			Obligate relationships	No
48 (Downlisted)	Branta sandvicensis	Goose, Hawaiian	Vertebrate	Bird	FWS Region 1: Pacific	HI	1	Does the species have specialized thermal tolerance (e.g. pika, trout) or depend on habitat with an important temperature threshold (e.g. sea ice)?			Temperature	No
48 (Downlisted)	Branta sandvicensis	Goose, Hawaiian	Vertebrate	Bird	FWS Region 1: Pacific	HI	2	Is the species dependent on habitat with specialized hydrology pattern (e.g. wetland, vernal pool, seasonal streams; sensitivity to drought)?			Hydrology	No
48 (Downlisted)	Branta sandvicensis	Goose, Hawaiian	Vertebrate	Bird	FWS Region 1: Pacific	HI	3	Is the species or its habitat sensitive to or dependent upon a certain disturbance regime (e.g. old growth forest, fire-adapted system; seasonal floods)?	Stochastic events such as hurricanes and floods, and severe drought (loss of forage).	https://www.govinfo.gov/content/pkg/FR-2019-12-19/pdf/2019-26548.pdf#page=1	Disturbance	Yes
48 (Downlisted)	Branta sandvicensis	Goose, Hawaiian	Vertebrate	Bird	FWS Region 1: Pacific	HI	4	Is the species or its habitat geographically restricted or confined by natural and/or anthropogenic barriers (e.g. mountain range, isolated soil type, coastal zone or island, or hemmed in by urban development)?	Used to occur in lowland habitat on all main islands. This habitat has become severely limited by development and predation and birds are restricted to marginal habitat on lava flows.	NatureServe	Isolation	No
48 (Downlisted)	Branta sandvicensis	Goose, Hawaiian	Vertebrate	Bird	FWS Region 1: Pacific	HI	5	Is the species or its habitat threatened by the spread of invasive or “out of balance” species (e.g. weed, forest pest, novel disease)?	Projected warmer temperatures and increased storm severity resulting from climate change are likely to exacerbate other threats to nene, such as enhancing the spread of nonnative invasive plants into these species’ native ecosystems.	https://www.govinfo.gov/content/pkg/FR-2019-12-19/pdf/2019-26548.pdf#page=1	Injurious species	Yes
48 (Downlisted)	Branta sandvicensis	Goose, Hawaiian	Vertebrate	Bird	FWS Region 1: Pacific	HI	6	Is the species sensitive to changes in chemical concentration (e.g. elevated atmospheric CO2, change in water pH, or dissolved oxygen tolerance)?			Chemistry	No
48 (Downlisted)	Branta sandvicensis	Goose, Hawaiian	Vertebrate	Bird	FWS Region 1: Pacific	HI	7	Does the species rely on particular triggers for life cycle events (breeding, migration, color change) that are likely to become out of sync with seasonal changes in resource availability or environmental conditions (phenologic mismatch)?			Phenology	No
48 (Downlisted)	Branta sandvicensis	Goose, Hawaiian	Vertebrate	Bird	FWS Region 1: Pacific	HI	8	Is the species is dependent on one or a few other species (e.g. host, pollinator, dominant food item) and may have limited alternatives if the required species declines due to climate change?			Obligate relationships	No
49	Brychius hungerfordi	Beetle, Hungerford's crawling water	Invertebrate	Arthropod	FWS Region 3: Midwest	MI	1	Does the species have specialized thermal tolerance (e.g. pika, trout) or depend on habitat with an important temperature threshold (e.g. sea ice)?			Temperature	No
49	Brychius hungerfordi	Beetle, Hungerford's crawling water	Invertebrate	Arthropod	FWS Region 3: Midwest	MI	2	Is the species dependent on habitat with specialized hydrology pattern (e.g. wetland, vernal pool, seasonal streams; sensitivity to drought)?	"This species apparently has specific habitat requirements that are vulnerable to changes in hydrology, predation by introduced fish, and degradation of water quality."	Natureserve	Hydrology	Yes
49	Brychius hungerfordi	Beetle, Hungerford's crawling water	Invertebrate	Arthropod	FWS Region 3: Midwest	MI	3	Is the species or its habitat sensitive to or dependent upon a certain disturbance regime (e.g. old growth forest, fire-adapted system; seasonal floods)?			Disturbance	No
49	Brychius hungerfordi	Beetle, Hungerford's crawling water	Invertebrate	Arthropod	FWS Region 3: Midwest	MI	4	Is the species or its habitat geographically restricted or confined by natural and/or anthropogenic barriers (e.g. mountain range, isolated soil type, coastal zone or island, or hemmed in by urban development)?			Isolation	No
49	Brychius hungerfordi	Beetle, Hungerford's crawling water	Invertebrate	Arthropod	FWS Region 3: Midwest	MI	5	Is the species or its habitat threatened by the spread of invasive or “out of balance” species (e.g. weed, forest pest, novel disease)?	"This species apparently has specific habitat requirements that are vulnerable to changes in hydrology, predation by introduced fish (Brown trout), and degradation of water quality."	Natureserve	Injurious species	Yes
49	Brychius hungerfordi	Beetle, Hungerford's crawling water	Invertebrate	Arthropod	FWS Region 3: Midwest	MI	6	Is the species sensitive to changes in chemical concentration (e.g. elevated atmospheric CO2, change in water pH, or dissolved oxygen tolerance)?			Chemistry	No
49	Brychius hungerfordi	Beetle, Hungerford's crawling water	Invertebrate	Arthropod	FWS Region 3: Midwest	MI	7	Does the species rely on particular triggers for life cycle events (breeding, migration, color change) that are likely to become out of sync with seasonal changes in resource availability or environmental conditions (phenologic mismatch)?			Phenology	No
49	Brychius hungerfordi	Beetle, Hungerford's crawling water	Invertebrate	Arthropod	FWS Region 3: Midwest	MI	8	Is the species is dependent on one or a few other species (e.g. host, pollinator, dominant food item) and may have limited alternatives if the required species declines due to climate change?	"Beaver (Castor canadensis) impoundments (Strand, 1989), and similiar structures, such as wing dams, culverts or mill races (Roughley, 1989), appear to be important to maintaining the habitat of this beetle."	Natureserve	Obligate relationships	Yes
50	Anaxyrus (fmr. Bufo) californicus	Toad, arroyo	Vertebrate	Amphibian	FWS Region 8: Pacific Southwest	CA	1	Does the species have specialized thermal tolerance (e.g. pika, trout) or depend on habitat with an important temperature threshold (e.g. sea ice)?	"Inactive in cold temperatures. Adults are primarily nocturnal except during the breeding season (Stebbins 1985). Adults are active at ambient temperatures of about 22-35 C."	Natureserve	Temperature	Yes
50	Anaxyrus (fmr. Bufo) californicus	Toad, arroyo	Vertebrate	Amphibian	FWS Region 8: Pacific Southwest	CA	2	Is the species dependent on habitat with specialized hydrology pattern (e.g. wetland, vernal pool, seasonal streams; sensitivity to drought)?	"Drought, especially of prolonged duration, results in a temporary loss of suitable habitat, particularly breeding pools. The number and intensity of floods decreases during droughts, limiting the formation and filling ofbreeding pools in flood channels."	recovery plan (http://ecos.fws.gov/docs/recovery_plan/990724.pdf)	Hydrology	Yes
50	Anaxyrus (fmr. Bufo) californicus	Toad, arroyo	Vertebrate	Amphibian	FWS Region 8: Pacific Southwest	CA	3	Is the species or its habitat sensitive to or dependent upon a certain disturbance regime (e.g. old growth forest, fire-adapted system; seasonal floods)?	"Periodic fires affect arroyo toads by causing direct mortality and destruction of streamside or terrace vegetation. Erosion increases following both natural and human-caused fires which can cause major changes in stream morphology and composition, reducing the number and size of pools. Those changes can affect the amount of habitat available for amphibian breeding and rearing, reducing reproduct…	recovery plan (http://ecos.fws.gov/docs/recovery_plan/990724.pdf)	Disturbance	Yes
50	Anaxyrus (fmr. Bufo) californicus	Toad, arroyo	Vertebrate	Amphibian	FWS Region 8: Pacific Southwest	CA	4	Is the species or its habitat geographically restricted or confined by natural and/or anthropogenic barriers (e.g. mountain range, isolated soil type, coastal zone or island, or hemmed in by urban development)?	Not particularly restricted. Species "occurs in at least a couple dozen sites, but viable populations may remain in only five drainages (USFWS 1993). Known in California from 22 river basins in 9 counties (USFWS 1999)."	Natureserve	Isolation	No
50	Anaxyrus (fmr. Bufo) californicus	Toad, arroyo	Vertebrate	Amphibian	FWS Region 8: Pacific Southwest	CA	5	Is the species or its habitat threatened by the spread of invasive or “out of balance” species (e.g. weed, forest pest, novel disease)?	"The stabilization of water flows and riparian vegetation also benefits a number of exotic species of plants and aquatic predators. . . These plants and animals, once they become established, tend to become widespread and build up large populations, which result in the loss of arroyo toads either indirectly through the degradation of habitat or directly through predation. "	recovery plan (http://ecos.fws.gov/docs/recovery_plan/990724.pdf)	Injurious species	Yes
50	Anaxyrus (fmr. Bufo) californicus	Toad, arroyo	Vertebrate	Amphibian	FWS Region 8: Pacific Southwest	CA	6	Is the species sensitive to changes in chemical concentration (e.g. elevated atmospheric CO2, change in water pH, or dissolved oxygen tolerance)?			Chemistry	No
50	Anaxyrus (fmr. Bufo) californicus	Toad, arroyo	Vertebrate	Amphibian	FWS Region 8: Pacific Southwest	CA	7	Does the species rely on particular triggers for life cycle events (breeding, migration, color change) that are likely to become out of sync with seasonal changes in resource availability or environmental conditions (phenologic mismatch)?	"Males usually begin calling when water temperatures reach 14 degrees Celsius (57 degrees Fahrenheit)." If water temperatures increase prematurely in the season, the clutch may hatch before peak resource availability.	recovery plan (http://ecos.fws.gov/docs/recovery_plan/990724.pdf)	Phenology	Yes
50	Anaxyrus (fmr. Bufo) californicus	Toad, arroyo	Vertebrate	Amphibian	FWS Region 8: Pacific Southwest	CA	8	Is the species is dependent on one or a few other species (e.g. host, pollinator, dominant food item) and may have limited alternatives if the required species declines due to climate change?			Obligate relationships	No
51	Bufo houstonensis	Toad, Houston	Vertebrate	Amphibian	FWS Region 2: Southwest	TX	1	Does the species have specialized thermal tolerance (e.g. pika, trout) or depend on habitat with an important temperature threshold (e.g. sea ice)?	Species has "narrow climateic tolerances" and will likely be sensitive to increased heat waves, especially when coupled with lower moisture	FWS five-year review (http://ecos.fws.gov/docs/five_year_review/doc3957.pdf)	Temperature	Yes
51	Bufo houstonensis	Toad, Houston	Vertebrate	Amphibian	FWS Region 2: Southwest	TX	2	Is the species dependent on habitat with specialized hydrology pattern (e.g. wetland, vernal pool, seasonal streams; sensitivity to drought)?	Species needs seasonally flooded areas or ponds for larvae. Water must persist for at least 60 days. Drought has been an additional stressor for the Houston toad for many years. "Direct effects of drought include desiccation, loss of breeding sites, and loss of eggs or tadpoles resulting from pond evaporation." Species may be more susceptible to hybridization with other species if chorus partitio…	FWS five-year review (http://ecos.fws.gov/docs/five_year_review/doc3957.pdf)	Hydrology	Yes
51	Bufo houstonensis	Toad, Houston	Vertebrate	Amphibian	FWS Region 2: Southwest	TX	3	Is the species or its habitat sensitive to or dependent upon a certain disturbance regime (e.g. old growth forest, fire-adapted system; seasonal floods)?	Disturbance (such as that caused by storms or clear-cutting) favors fire ants who prey on young of the species. Fire suppression has altered species habitat in a negative way and forest thinning is beneficial to the species.	NatureServe; FWS five-year review (http://ecos.fws.gov/docs/five_year_review/doc3957.pdf)	Disturbance	Yes
51	Bufo houstonensis	Toad, Houston	Vertebrate	Amphibian	FWS Region 2: Southwest	TX	4	Is the species or its habitat geographically restricted or confined by natural and/or anthropogenic barriers (e.g. mountain range, isolated soil type, coastal zone or island, or hemmed in by urban development)?	Species lost much of its habitat to urbanization in the Houston area and now has restricted range	NatureServe	Isolation	Yes
51	Bufo houstonensis	Toad, Houston	Vertebrate	Amphibian	FWS Region 2: Southwest	TX	5	Is the species or its habitat threatened by the spread of invasive or “out of balance” species (e.g. weed, forest pest, novel disease)?			Injurious species	No
51	Bufo houstonensis	Toad, Houston	Vertebrate	Amphibian	FWS Region 2: Southwest	TX	6	Is the species sensitive to changes in chemical concentration (e.g. elevated atmospheric CO2, change in water pH, or dissolved oxygen tolerance)?			Chemistry	No
51	Bufo houstonensis	Toad, Houston	Vertebrate	Amphibian	FWS Region 2: Southwest	TX	7	Does the species rely on particular triggers for life cycle events (breeding, migration, color change) that are likely to become out of sync with seasonal changes in resource availability or environmental conditions (phenologic mismatch)?	Warming could lead to an increase in hybridization by compressing altering mating chorus periods.	FWS five-year review (http://ecos.fws.gov/docs/five_year_review/doc3957.pdf)	Phenology	Yes
51	Bufo houstonensis	Toad, Houston	Vertebrate	Amphibian	FWS Region 2: Southwest	TX	8	Is the species is dependent on one or a few other species (e.g. host, pollinator, dominant food item) and may have limited alternatives if the required species declines due to climate change?			Obligate relationships	No
52	Buteo platypterus brunnescens	Hawk, Puerto Rican broad-winged	Vertebrate	Bird	FWS Region 4: Southeast	PR	1	Does the species have specialized thermal tolerance (e.g. pika, trout) or depend on habitat with an important temperature threshold (e.g. sea ice)?			Temperature	No
52	Buteo platypterus brunnescens	Hawk, Puerto Rican broad-winged	Vertebrate	Bird	FWS Region 4: Southeast	PR	2	Is the species dependent on habitat with specialized hydrology pattern (e.g. wetland, vernal pool, seasonal streams; sensitivity to drought)?	"The Puerto Rican broad-winged hawk is found in mature forests within the subtropical moist, subtropical wet, and rain forest life zones (Ewel and Whitmore 1973, p. 10)."	five-year review (http://ecos.fws.gov/docs/five_year_review/doc3575.pdf)	Hydrology	Yes
52	Buteo platypterus brunnescens	Hawk, Puerto Rican broad-winged	Vertebrate	Bird	FWS Region 4: Southeast	PR	3	Is the species or its habitat sensitive to or dependent upon a certain disturbance regime (e.g. old growth forest, fire-adapted system; seasonal floods)?	"The species is susceptible to natural habitat disturbances, such as strong storms and hurricanes, because of their limited distribution and specific habitat requirement of mature montane forests that may not be available in storm-damaged forests (Delannoy 1997, p.27, US Fish and Wildlife Service 1997, p.13)."	five-year review (http://ecos.fws.gov/docs/five_year_review/doc3575.pdf)	Disturbance	Yes
52	Buteo platypterus brunnescens	Hawk, Puerto Rican broad-winged	Vertebrate	Bird	FWS Region 4: Southeast	PR	4	Is the species or its habitat geographically restricted or confined by natural and/or anthropogenic barriers (e.g. mountain range, isolated soil type, coastal zone or island, or hemmed in by urban development)?	Endemic to PR in or near the Río Abajo Forest.	five-year review (http://ecos.fws.gov/docs/five_year_review/doc3575.pdf)	Isolation	Yes
52	Buteo platypterus brunnescens	Hawk, Puerto Rican broad-winged	Vertebrate	Bird	FWS Region 4: Southeast	PR	5	Is the species or its habitat threatened by the spread of invasive or “out of balance” species (e.g. weed, forest pest, novel disease)?			Injurious species	No
52	Buteo platypterus brunnescens	Hawk, Puerto Rican broad-winged	Vertebrate	Bird	FWS Region 4: Southeast	PR	6	Is the species sensitive to changes in chemical concentration (e.g. elevated atmospheric CO2, change in water pH, or dissolved oxygen tolerance)?			Chemistry	No
52	Buteo platypterus brunnescens	Hawk, Puerto Rican broad-winged	Vertebrate	Bird	FWS Region 4: Southeast	PR	7	Does the species rely on particular triggers for life cycle events (breeding, migration, color change) that are likely to become out of sync with seasonal changes in resource availability or environmental conditions (phenologic mismatch)?			Phenology	No
52	Buteo platypterus brunnescens	Hawk, Puerto Rican broad-winged	Vertebrate	Bird	FWS Region 4: Southeast	PR	8	Is the species is dependent on one or a few other species (e.g. host, pollinator, dominant food item) and may have limited alternatives if the required species declines due to climate change?			Obligate relationships	No
53 (Delisted)	Buteo solitarius	Hawk, Hawaiian	Vertebrate	Bird	FWS Region 1: Pacific	HI	1	Does the species have specialized thermal tolerance (e.g. pika, trout) or depend on habitat with an important temperature threshold (e.g. sea ice)?			Temperature	No
53 (Delisted)	Buteo solitarius	Hawk, Hawaiian	Vertebrate	Bird	FWS Region 1: Pacific	HI	2	Is the species dependent on habitat with specialized hydrology pattern (e.g. wetland, vernal pool, seasonal streams; sensitivity to drought)?			Hydrology	No
53 (Delisted)	Buteo solitarius	Hawk, Hawaiian	Vertebrate	Bird	FWS Region 1: Pacific	HI	3	Is the species or its habitat sensitive to or dependent upon a certain disturbance regime (e.g. old growth forest, fire-adapted system; seasonal floods)?			Disturbance	No
53 (Delisted)	Buteo solitarius	Hawk, Hawaiian	Vertebrate	Bird	FWS Region 1: Pacific	HI	4	Is the species or its habitat geographically restricted or confined by natural and/or anthropogenic barriers (e.g. mountain range, isolated soil type, coastal zone or island, or hemmed in by urban development)?	"RESIDENT in small numbers on the island of Hawaii (sea level to about 2600 m); accidental on Maui, Molokai, Oahu, and Kauai (Banko 1980, Scott et al. 1988)."	Natureserve	Isolation	Yes
53 (Delisted)	Buteo solitarius	Hawk, Hawaiian	Vertebrate	Bird	FWS Region 1: Pacific	HI	5	Is the species or its habitat threatened by the spread of invasive or “out of balance” species (e.g. weed, forest pest, novel disease)?	"The endemic passerines of Hawaii appear to be very vulnerable to the two introduced diseases of avian pox and avian malaria. Both are known to be transmitted by the introduced mosquito (Culex quinquefasciatus). Avian pox is also transmitted directly by contact among birds and by mites."	recovery plan (http://ecos.fws.gov/docs/recovery_plan/840509.pdf)	Injurious species	Yes
53 (Delisted)	Buteo solitarius	Hawk, Hawaiian	Vertebrate	Bird	FWS Region 1: Pacific	HI	6	Is the species sensitive to changes in chemical concentration (e.g. elevated atmospheric CO2, change in water pH, or dissolved oxygen tolerance)?			Chemistry	No
53 (Delisted)	Buteo solitarius	Hawk, Hawaiian	Vertebrate	Bird	FWS Region 1: Pacific	HI	7	Does the species rely on particular triggers for life cycle events (breeding, migration, color change) that are likely to become out of sync with seasonal changes in resource availability or environmental conditions (phenologic mismatch)?			Phenology	No
53 (Delisted)	Buteo solitarius	Hawk, Hawaiian	Vertebrate	Bird	FWS Region 1: Pacific	HI	8	Is the species is dependent on one or a few other species (e.g. host, pollinator, dominant food item) and may have limited alternatives if the required species declines due to climate change?	"Nests in trees of various kinds, but in recent survey, native ohia trees (METROSIDEROS spp.) were selected 80% of the time (USFWS 1998)." However, this is the dominant species in Hawaii forests and size appears to matter more than species to this hawk.	Natureserve and recovery plan (http://ecos.fws.gov/docs/recovery_plan/840509.pdf)	Obligate relationships	No
54	Callophrys mossii bayensis	Butterfly, San Bruno elfin	Invertebrate	Arthropod	FWS Region 8: Pacific Southwest	CA	1	Does the species have specialized thermal tolerance (e.g. pika, trout) or depend on habitat with an important temperature threshold (e.g. sea ice)?	This species "is found in coastal mountains near SF Bay, in the fog belt of steep north facing slopes that receive little direct sunlight." _x000D_	http://www.xerces.org/wp-content/uploads/2008/09/callophrys_mossii_bayensis.pdf	Temperature	Yes
54	Callophrys mossii bayensis	Butterfly, San Bruno elfin	Invertebrate	Arthropod	FWS Region 8: Pacific Southwest	CA	2	Is the species dependent on habitat with specialized hydrology pattern (e.g. wetland, vernal pool, seasonal streams; sensitivity to drought)?			Hydrology	No
54	Callophrys mossii bayensis	Butterfly, San Bruno elfin	Invertebrate	Arthropod	FWS Region 8: Pacific Southwest	CA	3	Is the species or its habitat sensitive to or dependent upon a certain disturbance regime (e.g. old growth forest, fire-adapted system; seasonal floods)?			Disturbance	No
54	Callophrys mossii bayensis	Butterfly, San Bruno elfin	Invertebrate	Arthropod	FWS Region 8: Pacific Southwest	CA	4	Is the species or its habitat geographically restricted or confined by natural and/or anthropogenic barriers (e.g. mountain range, isolated soil type, coastal zone or island, or hemmed in by urban development)?			Isolation	No
54	Callophrys mossii bayensis	Butterfly, San Bruno elfin	Invertebrate	Arthropod	FWS Region 8: Pacific Southwest	CA	5	Is the species or its habitat threatened by the spread of invasive or “out of balance” species (e.g. weed, forest pest, novel disease)?			Injurious species	No
54	Callophrys mossii bayensis	Butterfly, San Bruno elfin	Invertebrate	Arthropod	FWS Region 8: Pacific Southwest	CA	6	Is the species sensitive to changes in chemical concentration (e.g. elevated atmospheric CO2, change in water pH, or dissolved oxygen tolerance)?			Chemistry	No
54	Callophrys mossii bayensis	Butterfly, San Bruno elfin	Invertebrate	Arthropod	FWS Region 8: Pacific Southwest	CA	7	Does the species rely on particular triggers for life cycle events (breeding, migration, color change) that are likely to become out of sync with seasonal changes in resource availability or environmental conditions (phenologic mismatch)?			Phenology	No
54	Callophrys mossii bayensis	Butterfly, San Bruno elfin	Invertebrate	Arthropod	FWS Region 8: Pacific Southwest	CA	8	Is the species is dependent on one or a few other species (e.g. host, pollinator, dominant food item) and may have limited alternatives if the required species declines due to climate change?	Single "larval hostplant (broadleaf stonecrop) was previously widespread and that the San Bruno Elfin may have inhabited sites now built on or lost to exotic invasive plants such as iceplant (Mesembryanthemum sp.) and eucalyptus (Eucalyptus sp.). In many areas the hostplant is being outcompeted by invasives, but it is not clear whether this is climate related."	http://www.xerces.org/wp-content/uploads/2008/09/callophrys_mossii_bayensis.pdf	Obligate relationships	Yes
55	Cambarus aculabrum	Crayfish, cave(1)	Invertebrate	Arthropod	FWS Region 4: Southeast	AR, MO	1	Does the species have specialized thermal tolerance (e.g. pika, trout) or depend on habitat with an important temperature threshold (e.g. sea ice)?			Temperature	No
55	Cambarus aculabrum	Crayfish, cave(1)	Invertebrate	Arthropod	FWS Region 4: Southeast	AR, MO	2	Is the species dependent on habitat with specialized hydrology pattern (e.g. wetland, vernal pool, seasonal streams; sensitivity to drought)?	Species sensitive to groundwater contamination and lowering of the aquifer (drought included).	Natureserve	Hydrology	Yes
55	Cambarus aculabrum	Crayfish, cave(1)	Invertebrate	Arthropod	FWS Region 4: Southeast	AR, MO	3	Is the species or its habitat sensitive to or dependent upon a certain disturbance regime (e.g. old growth forest, fire-adapted system; seasonal floods)?			Disturbance	No
55	Cambarus aculabrum	Crayfish, cave(1)	Invertebrate	Arthropod	FWS Region 4: Southeast	AR, MO	4	Is the species or its habitat geographically restricted or confined by natural and/or anthropogenic barriers (e.g. mountain range, isolated soil type, coastal zone or island, or hemmed in by urban development)?	"This species has an Extent of Occurrence of less than 10 sq. km as each of the four cave pools has a maximum area of 200 m. The caves are severely fragmented and they are not connected to each other."	Natureserve	Isolation	Yes
55	Cambarus aculabrum	Crayfish, cave(1)	Invertebrate	Arthropod	FWS Region 4: Southeast	AR, MO	5	Is the species or its habitat threatened by the spread of invasive or “out of balance” species (e.g. weed, forest pest, novel disease)?			Injurious species	No
55	Cambarus aculabrum	Crayfish, cave(1)	Invertebrate	Arthropod	FWS Region 4: Southeast	AR, MO	6	Is the species sensitive to changes in chemical concentration (e.g. elevated atmospheric CO2, change in water pH, or dissolved oxygen tolerance)?			Chemistry	No
55	Cambarus aculabrum	Crayfish, cave(1)	Invertebrate	Arthropod	FWS Region 4: Southeast	AR, MO	7	Does the species rely on particular triggers for life cycle events (breeding, migration, color change) that are likely to become out of sync with seasonal changes in resource availability or environmental conditions (phenologic mismatch)?			Phenology	No
55	Cambarus aculabrum	Crayfish, cave(1)	Invertebrate	Arthropod	FWS Region 4: Southeast	AR, MO	8	Is the species is dependent on one or a few other species (e.g. host, pollinator, dominant food item) and may have limited alternatives if the required species declines due to climate change?			Obligate relationships	No
56	Cambarus veteranus	Guyandotte River crayfish	Invertebrate	Arthropod	FWS Region 5: Northeast	WV	1	Does the species have specialized thermal tolerance (e.g. pika, trout) or depend on habitat with an important temperature threshold (e.g. sea ice)?	"These data and information on the thermal preferences of other streamdwelling crayfishes indicate that the likely preferred temperature for the Big Sandy and Guyandotte River crayfishes is around 21 to 22 °C (71 to 72 °F) (Espina et al. 1993, pp. 37–38; Keller and Hazlett 2010, p. 619)."	listing decision: https://www.gpo.gov/fdsys/pkg/FR-2016-04-07/pdf/2016-07744.pdf	Temperature	Yes
56	Cambarus veteranus	Guyandotte River crayfish	Invertebrate	Arthropod	FWS Region 5: Northeast	WV	2	Is the species dependent on habitat with specialized hydrology pattern (e.g. wetland, vernal pool, seasonal streams; sensitivity to drought)?	Large perennial streams with cobble bottoms	listing decision: https://www.gpo.gov/fdsys/pkg/FR-2016-04-07/pdf/2016-07744.pdf	Hydrology	No
56	Cambarus veteranus	Guyandotte River crayfish	Invertebrate	Arthropod	FWS Region 5: Northeast	WV	3	Is the species or its habitat sensitive to or dependent upon a certain disturbance regime (e.g. old growth forest, fire-adapted system; seasonal floods)?	"Intolerant of excessive sedimentation."	listing decision: https://www.gpo.gov/fdsys/pkg/FR-2016-04-07/pdf/2016-07744.pdf	Disturbance	Yes
56	Cambarus veteranus	Guyandotte River crayfish	Invertebrate	Arthropod	FWS Region 5: Northeast	WV	4	Is the species or its habitat geographically restricted or confined by natural and/or anthropogenic barriers (e.g. mountain range, isolated soil type, coastal zone or island, or hemmed in by urban development)?	Restricted to the higher elevation reaches of stream systems.	listing decision: https://www.gpo.gov/fdsys/pkg/FR-2016-04-07/pdf/2016-07744.pdf	Isolation	Yes
56	Cambarus veteranus	Guyandotte River crayfish	Invertebrate	Arthropod	FWS Region 5: Northeast	WV	5	Is the species or its habitat threatened by the spread of invasive or “out of balance” species (e.g. weed, forest pest, novel disease)?		listing decision: https://www.gpo.gov/fdsys/pkg/FR-2016-04-07/pdf/2016-07744.pdf	Injurious species	No
56	Cambarus veteranus	Guyandotte River crayfish	Invertebrate	Arthropod	FWS Region 5: Northeast	WV	6	Is the species sensitive to changes in chemical concentration (e.g. elevated atmospheric CO2, change in water pH, or dissolved oxygen tolerance)?	Not described explicitly, apart from thermal tolerance.	listing decision: https://www.gpo.gov/fdsys/pkg/FR-2016-04-07/pdf/2016-07744.pdf	Chemistry	No
56	Cambarus veteranus	Guyandotte River crayfish	Invertebrate	Arthropod	FWS Region 5: Northeast	WV	7	Does the species rely on particular triggers for life cycle events (breeding, migration, color change) that are likely to become out of sync with seasonal changes in resource availability or environmental conditions (phenologic mismatch)?	Life cycle timings are generally known, seem flexible	listing decision: https://www.gpo.gov/fdsys/pkg/FR-2016-04-07/pdf/2016-07744.pdf	Phenology	No
56	Cambarus veteranus	Guyandotte River crayfish	Invertebrate	Arthropod	FWS Region 5: Northeast	WV	8	Is the species is dependent on one or a few other species (e.g. host, pollinator, dominant food item) and may have limited alternatives if the required species declines due to climate change?	Opportunistic omnivore	listing decision: https://www.gpo.gov/fdsys/pkg/FR-2016-04-07/pdf/2016-07744.pdf	Obligate relationships	No
57	Cambarus zophonastes	Crayfish, cave(2)	Invertebrate	Arthropod	FWS Region 4: Southeast	AR	1	Does the species have specialized thermal tolerance (e.g. pika, trout) or depend on habitat with an important temperature threshold (e.g. sea ice)?			Temperature	No
57	Cambarus zophonastes	Crayfish, cave(2)	Invertebrate	Arthropod	FWS Region 4: Southeast	AR	2	Is the species dependent on habitat with specialized hydrology pattern (e.g. wetland, vernal pool, seasonal streams; sensitivity to drought)?	This species is found in 2 caves created by a solution channel with considerable permanent water. The species is known from two cave pools, but as well as subterranean (some periodically dry) streams further into the caves (Robison and Allen, 1995; Graening et al., 2006; USFWS, 1987; 1988).	Natureserve	Hydrology	Yes
57	Cambarus zophonastes	Crayfish, cave(2)	Invertebrate	Arthropod	FWS Region 4: Southeast	AR	3	Is the species or its habitat sensitive to or dependent upon a certain disturbance regime (e.g. old growth forest, fire-adapted system; seasonal floods)?			Disturbance	No
57	Cambarus zophonastes	Crayfish, cave(2)	Invertebrate	Arthropod	FWS Region 4: Southeast	AR	4	Is the species or its habitat geographically restricted or confined by natural and/or anthropogenic barriers (e.g. mountain range, isolated soil type, coastal zone or island, or hemmed in by urban development)?	"This species has an Extent of Occurrence of 0.457 km2 and occurs in two locations. In 2006, 23 individuals were recorded, 14 at Hell's Creek and nine at Nesbitt Cave."	Natureserve	Isolation	Yes
57	Cambarus zophonastes	Crayfish, cave(2)	Invertebrate	Arthropod	FWS Region 4: Southeast	AR	5	Is the species or its habitat threatened by the spread of invasive or “out of balance” species (e.g. weed, forest pest, novel disease)?			Injurious species	No
57	Cambarus zophonastes	Crayfish, cave(2)	Invertebrate	Arthropod	FWS Region 4: Southeast	AR	6	Is the species sensitive to changes in chemical concentration (e.g. elevated atmospheric CO2, change in water pH, or dissolved oxygen tolerance)?			Chemistry	No
57	Cambarus zophonastes	Crayfish, cave(2)	Invertebrate	Arthropod	FWS Region 4: Southeast	AR	7	Does the species rely on particular triggers for life cycle events (breeding, migration, color change) that are likely to become out of sync with seasonal changes in resource availability or environmental conditions (phenologic mismatch)?			Phenology	No
57	Cambarus zophonastes	Crayfish, cave(2)	Invertebrate	Arthropod	FWS Region 4: Southeast	AR	8	Is the species is dependent on one or a few other species (e.g. host, pollinator, dominant food item) and may have limited alternatives if the required species declines due to climate change?	"Due to the delicate environment that C. zophonastes inhabits, its access to sufficient nutrients is limited, and reliant on Grey Bat guano and leaf litter from flood waters. However, Grey Bats have not been recorded in Hell's Creek Cave for sometime, thus limiting C. zophonastes nutrient intake."	Natureserve	Obligate relationships	Yes
58	Campeloma decampi	Campeloma, slender	Invertebrate	Mollusk	FWS Region 4: Southeast	AL	1	Does the species have specialized thermal tolerance (e.g. pika, trout) or depend on habitat with an important temperature threshold (e.g. sea ice)?	Most snail species "are intolerant of temperatures greater than 45°C (McDonald, 1969; van der Schalie and Berry, 1973), a condition rarely occurring naturally."	Natureserve	Temperature	Yes
58	Campeloma decampi	Campeloma, slender	Invertebrate	Mollusk	FWS Region 4: Southeast	AL	2	Is the species dependent on habitat with specialized hydrology pattern (e.g. wetland, vernal pool, seasonal streams; sensitivity to drought)?	Requires freshwater, intolerant of high salinity.	Natureserve	Hydrology	Yes
58	Campeloma decampi	Campeloma, slender	Invertebrate	Mollusk	FWS Region 4: Southeast	AL	3	Is the species or its habitat sensitive to or dependent upon a certain disturbance regime (e.g. old growth forest, fire-adapted system; seasonal floods)?	"Sedimentation of rivers and streams may affect the reproductive success of aquatic snails by eliminating breeding habitat and interfering with their feeding activity by reducing or eliminating periphyton (plankton which live attached to rooted aquatic plants) food sources."	Natureserve	Disturbance	Yes
58	Campeloma decampi	Campeloma, slender	Invertebrate	Mollusk	FWS Region 4: Southeast	AL	4	Is the species or its habitat geographically restricted or confined by natural and/or anthropogenic barriers (e.g. mountain range, isolated soil type, coastal zone or island, or hemmed in by urban development)?	Original range was four times larger than currently. "Known to be extant in Limestone, Piney, and Round Island Creeks, Limestone County, north central Alabama (Mirarchi et al., 2004) along only two or three short river stretches (USFWS, 2000)."	Natureserve	Isolation	No
58	Campeloma decampi	Campeloma, slender	Invertebrate	Mollusk	FWS Region 4: Southeast	AL	5	Is the species or its habitat threatened by the spread of invasive or “out of balance” species (e.g. weed, forest pest, novel disease)?			Injurious species	No
58	Campeloma decampi	Campeloma, slender	Invertebrate	Mollusk	FWS Region 4: Southeast	AL	6	Is the species sensitive to changes in chemical concentration (e.g. elevated atmospheric CO2, change in water pH, or dissolved oxygen tolerance)?	"Snails are uncommon in habitats with surface acidity greater than pH 5 (see also Jokinen, 1983). Dissolved oxygen limits diversity so warm or severely polluted waters (oxygen consumed by algae blooms) are often devoid of freshwater snails."	Natureserve	Chemistry	Yes
58	Campeloma decampi	Campeloma, slender	Invertebrate	Mollusk	FWS Region 4: Southeast	AL	7	Does the species rely on particular triggers for life cycle events (breeding, migration, color change) that are likely to become out of sync with seasonal changes in resource availability or environmental conditions (phenologic mismatch)?			Phenology	No
58	Campeloma decampi	Campeloma, slender	Invertebrate	Mollusk	FWS Region 4: Southeast	AL	8	Is the species is dependent on one or a few other species (e.g. host, pollinator, dominant food item) and may have limited alternatives if the required species declines due to climate change?			Obligate relationships	No
59	Canis lupus baileyi	Wolf, gray	Vertebrate	Mammal	FWS Region 2: Southwest	AZ, NM	1	Does the species have specialized thermal tolerance (e.g. pika, trout) or depend on habitat with an important temperature threshold (e.g. sea ice)?			Temperature	No
59	Canis lupus baileyi	Wolf, gray	Vertebrate	Mammal	FWS Region 2: Southwest	AZ, NM	2	Is the species dependent on habitat with specialized hydrology pattern (e.g. wetland, vernal pool, seasonal streams; sensitivity to drought)?	Prey availability may be affected by drought.	listing decision (http://www.gpo.gov/fdsys/pkg/FR-2015-01-16/pdf/2015-00441.pdf)	Hydrology	Yes
59	Canis lupus baileyi	Wolf, gray	Vertebrate	Mammal	FWS Region 2: Southwest	AZ, NM	3	Is the species or its habitat sensitive to or dependent upon a certain disturbance regime (e.g. old growth forest, fire-adapted system; seasonal floods)?			Disturbance	No
59	Canis lupus baileyi	Wolf, gray	Vertebrate	Mammal	FWS Region 2: Southwest	AZ, NM	4	Is the species or its habitat geographically restricted or confined by natural and/or anthropogenic barriers (e.g. mountain range, isolated soil type, coastal zone or island, or hemmed in by urban development)?			Isolation	No
59	Canis lupus baileyi	Wolf, gray	Vertebrate	Mammal	FWS Region 2: Southwest	AZ, NM	5	Is the species or its habitat threatened by the spread of invasive or “out of balance” species (e.g. weed, forest pest, novel disease)?			Injurious species	No
59	Canis lupus baileyi	Wolf, gray	Vertebrate	Mammal	FWS Region 2: Southwest	AZ, NM	6	Is the species sensitive to changes in chemical concentration (e.g. elevated atmospheric CO2, change in water pH, or dissolved oxygen tolerance)?			Chemistry	No
59	Canis lupus baileyi	Wolf, gray	Vertebrate	Mammal	FWS Region 2: Southwest	AZ, NM	7	Does the species rely on particular triggers for life cycle events (breeding, migration, color change) that are likely to become out of sync with seasonal changes in resource availability or environmental conditions (phenologic mismatch)?			Phenology	No
59	Canis lupus baileyi	Wolf, gray	Vertebrate	Mammal	FWS Region 2: Southwest	AZ, NM	8	Is the species is dependent on one or a few other species (e.g. host, pollinator, dominant food item) and may have limited alternatives if the required species declines due to climate change?	Dietary generalist.	Defenders.org	Obligate relationships	No
60	Canis rufus	Wolf, red	Vertebrate	Mammal	FWS Region 4: Southeast	NC, SC	1	Does the species have specialized thermal tolerance (e.g. pika, trout) or depend on habitat with an important temperature threshold (e.g. sea ice)?			Temperature	No
60	Canis rufus	Wolf, red	Vertebrate	Mammal	FWS Region 4: Southeast	NC, SC	2	Is the species dependent on habitat with specialized hydrology pattern (e.g. wetland, vernal pool, seasonal streams; sensitivity to drought)?			Hydrology	No
60	Canis rufus	Wolf, red	Vertebrate	Mammal	FWS Region 4: Southeast	NC, SC	3	Is the species or its habitat sensitive to or dependent upon a certain disturbance regime (e.g. old growth forest, fire-adapted system; seasonal floods)?			Disturbance	No
60	Canis rufus	Wolf, red	Vertebrate	Mammal	FWS Region 4: Southeast	NC, SC	4	Is the species or its habitat geographically restricted or confined by natural and/or anthropogenic barriers (e.g. mountain range, isolated soil type, coastal zone or island, or hemmed in by urban development)?	Geographically confined to coastal areas threatened by sea-level rise	Defenders.org	Isolation	Yes
60	Canis rufus	Wolf, red	Vertebrate	Mammal	FWS Region 4: Southeast	NC, SC	5	Is the species or its habitat threatened by the spread of invasive or “out of balance” species (e.g. weed, forest pest, novel disease)?	"Because canid diseases can spread quickly, they can cause serious setbacks in red wolf recovery. Canid diseases remain a serious threat to the red wolf NEP and to captive red wolves."	five-year review (http://ecos.fws.gov/docs/five_year_review/doc3991.pdf)	Injurious species	Yes
60	Canis rufus	Wolf, red	Vertebrate	Mammal	FWS Region 4: Southeast	NC, SC	6	Is the species sensitive to changes in chemical concentration (e.g. elevated atmospheric CO2, change in water pH, or dissolved oxygen tolerance)?			Chemistry	No
60	Canis rufus	Wolf, red	Vertebrate	Mammal	FWS Region 4: Southeast	NC, SC	7	Does the species rely on particular triggers for life cycle events (breeding, migration, color change) that are likely to become out of sync with seasonal changes in resource availability or environmental conditions (phenologic mismatch)?			Phenology	No
60	Canis rufus	Wolf, red	Vertebrate	Mammal	FWS Region 4: Southeast	NC, SC	8	Is the species is dependent on one or a few other species (e.g. host, pollinator, dominant food item) and may have limited alternatives if the required species declines due to climate change?			Obligate relationships	No
61	Caprimulgus noctitherus	Nightjar, Puerto Rican	Vertebrate	Bird	FWS Region 4: Southeast	PR	1	Does the species have specialized thermal tolerance (e.g. pika, trout) or depend on habitat with an important temperature threshold (e.g. sea ice)?			Temperature	No
61	Caprimulgus noctitherus	Nightjar, Puerto Rican	Vertebrate	Bird	FWS Region 4: Southeast	PR	2	Is the species dependent on habitat with specialized hydrology pattern (e.g. wetland, vernal pool, seasonal streams; sensitivity to drought)?			Hydrology	No
61	Caprimulgus noctitherus	Nightjar, Puerto Rican	Vertebrate	Bird	FWS Region 4: Southeast	PR	3	Is the species or its habitat sensitive to or dependent upon a certain disturbance regime (e.g. old growth forest, fire-adapted system; seasonal floods)?			Disturbance	No
61	Caprimulgus noctitherus	Nightjar, Puerto Rican	Vertebrate	Bird	FWS Region 4: Southeast	PR	4	Is the species or its habitat geographically restricted or confined by natural and/or anthropogenic barriers (e.g. mountain range, isolated soil type, coastal zone or island, or hemmed in by urban development)?	Habitat restricted to lower slopes and coastal plains of Puerto Rico.	recovery plan (http://ecos.fws.gov/docs/recovery_plan/840419d.pdf)	Isolation	Yes
61	Caprimulgus noctitherus	Nightjar, Puerto Rican	Vertebrate	Bird	FWS Region 4: Southeast	PR	5	Is the species or its habitat threatened by the spread of invasive or “out of balance” species (e.g. weed, forest pest, novel disease)?	Predation of breeding nightjars and their nests by exotic mammals (feral cats/mongooses/monkeys) has been documented (Vilella 1995). No clear climate nexus	recovery plan (http://ecos.fws.gov/docs/recovery_plan/840419d.pdf)	Injurious species	No
61	Caprimulgus noctitherus	Nightjar, Puerto Rican	Vertebrate	Bird	FWS Region 4: Southeast	PR	6	Is the species sensitive to changes in chemical concentration (e.g. elevated atmospheric CO2, change in water pH, or dissolved oxygen tolerance)?			Chemistry	No
61	Caprimulgus noctitherus	Nightjar, Puerto Rican	Vertebrate	Bird	FWS Region 4: Southeast	PR	7	Does the species rely on particular triggers for life cycle events (breeding, migration, color change) that are likely to become out of sync with seasonal changes in resource availability or environmental conditions (phenologic mismatch)?			Phenology	No
61	Caprimulgus noctitherus	Nightjar, Puerto Rican	Vertebrate	Bird	FWS Region 4: Southeast	PR	8	Is the species is dependent on one or a few other species (e.g. host, pollinator, dominant food item) and may have limited alternatives if the required species declines due to climate change?			Obligate relationships	No
62	Caretta caretta	Turtle, Loggerhead sea	Vertebrate	Reptile	FWS Region 4: Southeast	AL , FL, GA, LA, MS, NC, SC, TX, VA	1	Does the species have specialized thermal tolerance (e.g. pika, trout) or depend on habitat with an important temperature threshold (e.g. sea ice)?	Two potential temperature impacs: 1) Since sexual differentiation depends on incubation temperature, there is concern that global warming may result in an imbalance in the sex ratio. Turtle are also susceptible to cold stunning. 2) ScienceDirect article: "there was an inverse correlation between nesting abundance and mean annual sea surface temperature in the core foraging region during the year …	Natureserve; http://www.sciencedirect.com/science/article/pii/S0022098107005813_x000D_	Temperature	Yes
62	Caretta caretta	Turtle, Loggerhead sea	Vertebrate	Reptile	FWS Region 4: Southeast	AL , FL, GA, LA, MS, NC, SC, TX, VA	2	Is the species dependent on habitat with specialized hydrology pattern (e.g. wetland, vernal pool, seasonal streams; sensitivity to drought)?			Hydrology	No
62	Caretta caretta	Turtle, Loggerhead sea	Vertebrate	Reptile	FWS Region 4: Southeast	AL , FL, GA, LA, MS, NC, SC, TX, VA	3	Is the species or its habitat sensitive to or dependent upon a certain disturbance regime (e.g. old growth forest, fire-adapted system; seasonal floods)?	Eggs can be destroyed by extreme rainfall events.	Natureserve	Disturbance	Yes
62	Caretta caretta	Turtle, Loggerhead sea	Vertebrate	Reptile	FWS Region 4: Southeast	AL , FL, GA, LA, MS, NC, SC, TX, VA	4	Is the species or its habitat geographically restricted or confined by natural and/or anthropogenic barriers (e.g. mountain range, isolated soil type, coastal zone or island, or hemmed in by urban development)?	Coastal nesting beaches and barrier islands vulnerable to SLR. "We project up to a 43% decrease in beach area from 1986 to a future with 0.5 m of sea level rise and predict that loggerhead nesting will shift northward and become increasingly crowded on narrowing beaches. An implication of this study is that areas currently protected for large rookeries may not overlap with their future distributi…	Natureserve; http://www.int-res.com/abstracts/meps/v493/p259-274/	Isolation	Yes
62	Caretta caretta	Turtle, Loggerhead sea	Vertebrate	Reptile	FWS Region 4: Southeast	AL , FL, GA, LA, MS, NC, SC, TX, VA	5	Is the species or its habitat threatened by the spread of invasive or “out of balance” species (e.g. weed, forest pest, novel disease)?			Injurious species	No
62	Caretta caretta	Turtle, Loggerhead sea	Vertebrate	Reptile	FWS Region 4: Southeast	AL , FL, GA, LA, MS, NC, SC, TX, VA	6	Is the species sensitive to changes in chemical concentration (e.g. elevated atmospheric CO2, change in water pH, or dissolved oxygen tolerance)?			Chemistry	No
62	Caretta caretta	Turtle, Loggerhead sea	Vertebrate	Reptile	FWS Region 4: Southeast	AL , FL, GA, LA, MS, NC, SC, TX, VA	7	Does the species rely on particular triggers for life cycle events (breeding, migration, color change) that are likely to become out of sync with seasonal changes in resource availability or environmental conditions (phenologic mismatch)?			Phenology	No
62	Caretta caretta	Turtle, Loggerhead sea	Vertebrate	Reptile	FWS Region 4: Southeast	AL , FL, GA, LA, MS, NC, SC, TX, VA	8	Is the species is dependent on one or a few other species (e.g. host, pollinator, dominant food item) and may have limited alternatives if the required species declines due to climate change?			Obligate relationships	No
63	Catostomus discobulus yarrowi	Sucker, Zuni bluehead	Vertebrate	Fish	FWS Region 2: Southwest	AZ, NM	1	Does the species have specialized thermal tolerance (e.g. pika, trout) or depend on habitat with an important temperature threshold (e.g. sea ice)?			Temperature	No
63	Catostomus discobulus yarrowi	Sucker, Zuni bluehead	Vertebrate	Fish	FWS Region 2: Southwest	AZ, NM	2	Is the species dependent on habitat with specialized hydrology pattern (e.g. wetland, vernal pool, seasonal streams; sensitivity to drought)?	Small streams threatened by long-term drought.	Natureserve	Hydrology	Yes
63	Catostomus discobulus yarrowi	Sucker, Zuni bluehead	Vertebrate	Fish	FWS Region 2: Southwest	AZ, NM	3	Is the species or its habitat sensitive to or dependent upon a certain disturbance regime (e.g. old growth forest, fire-adapted system; seasonal floods)?	Sensitive to sedimentation and scouring effects of floods.	Natureserve	Disturbance	Yes
63	Catostomus discobulus yarrowi	Sucker, Zuni bluehead	Vertebrate	Fish	FWS Region 2: Southwest	AZ, NM	4	Is the species or its habitat geographically restricted or confined by natural and/or anthropogenic barriers (e.g. mountain range, isolated soil type, coastal zone or island, or hemmed in by urban development)?	Headwater streams are isolated.	Natureserve	Isolation	Yes
63	Catostomus discobulus yarrowi	Sucker, Zuni bluehead	Vertebrate	Fish	FWS Region 2: Southwest	AZ, NM	5	Is the species or its habitat threatened by the spread of invasive or “out of balance” species (e.g. weed, forest pest, novel disease)?	Black grub parasite and introduced fishes are threats.	Natureserve	Injurious species	Yes
63	Catostomus discobulus yarrowi	Sucker, Zuni bluehead	Vertebrate	Fish	FWS Region 2: Southwest	AZ, NM	6	Is the species sensitive to changes in chemical concentration (e.g. elevated atmospheric CO2, change in water pH, or dissolved oxygen tolerance)?			Chemistry	No
63	Catostomus discobulus yarrowi	Sucker, Zuni bluehead	Vertebrate	Fish	FWS Region 2: Southwest	AZ, NM	7	Does the species rely on particular triggers for life cycle events (breeding, migration, color change) that are likely to become out of sync with seasonal changes in resource availability or environmental conditions (phenologic mismatch)?			Phenology	No
63	Catostomus discobulus yarrowi	Sucker, Zuni bluehead	Vertebrate	Fish	FWS Region 2: Southwest	AZ, NM	8	Is the species is dependent on one or a few other species (e.g. host, pollinator, dominant food item) and may have limited alternatives if the required species declines due to climate change?			Obligate relationships	No
64	Charadrius melodus	Plover, piping	Vertebrate	Bird	FWS Region 5: Northeast	AL, AR, CO, CT, DE, FL, GA, IA, IL, IN, KS, KY, LA, MA, MD, ME, MI, MN, MO, MS, MT, NC, ND, NE, NH, NJ, NY, OH, OK, PA, RI, SC, SD, TN, TX, VA, WI, WY	1	Does the species have specialized thermal tolerance (e.g. pika, trout) or depend on habitat with an important temperature threshold (e.g. sea ice)?			Temperature	No
64	Charadrius melodus	Plover, piping	Vertebrate	Bird	FWS Region 5: Northeast	AL, AR, CO, CT, DE, FL, GA, IA, IL, IN, KS, KY, LA, MA, MD, ME, MI, MN, MO, MS, MT, NC, ND, NE, NH, NJ, NY, OH, OK, PA, RI, SC, SD, TN, TX, VA, WI, WY	2	Is the species dependent on habitat with specialized hydrology pattern (e.g. wetland, vernal pool, seasonal streams; sensitivity to drought)?			Hydrology	No
64	Charadrius melodus	Plover, piping	Vertebrate	Bird	FWS Region 5: Northeast	AL, AR, CO, CT, DE, FL, GA, IA, IL, IN, KS, KY, LA, MA, MD, ME, MI, MN, MO, MS, MT, NC, ND, NE, NH, NJ, NY, OH, OK, PA, RI, SC, SD, TN, TX, VA, WI, WY	3	Is the species or its habitat sensitive to or dependent upon a certain disturbance regime (e.g. old growth forest, fire-adapted system; seasonal floods)?	"Rising lake levels in the Great Lakes narrowed beaches and may have caused habitat loss (Bradstreet et al. 1977). Hay and Lingle (1981) discuss destruction of nests due to flooding."	Natureserve	Disturbance	Yes
64	Charadrius melodus	Plover, piping	Vertebrate	Bird	FWS Region 5: Northeast	AL, AR, CO, CT, DE, FL, GA, IA, IL, IN, KS, KY, LA, MA, MD, ME, MI, MN, MO, MS, MT, NC, ND, NE, NH, NJ, NY, OH, OK, PA, RI, SC, SD, TN, TX, VA, WI, WY	4	Is the species or its habitat geographically restricted or confined by natural and/or anthropogenic barriers (e.g. mountain range, isolated soil type, coastal zone or island, or hemmed in by urban development)?	The species' coastal breeding habitats are threatened by sea-level rise.	http://ecos.fws.gov/docs/action_plans/doc3118.pdf	Isolation	Yes
64	Charadrius melodus	Plover, piping	Vertebrate	Bird	FWS Region 5: Northeast	AL, AR, CO, CT, DE, FL, GA, IA, IL, IN, KS, KY, LA, MA, MD, ME, MI, MN, MO, MS, MT, NC, ND, NE, NH, NJ, NY, OH, OK, PA, RI, SC, SD, TN, TX, VA, WI, WY	5	Is the species or its habitat threatened by the spread of invasive or “out of balance” species (e.g. weed, forest pest, novel disease)?	"Woody species encroachment of lake shorelines and riverbanks may be responsible for habitat loss. . . Invasion of sites by Marram Grass, Bayberry, and even spruces is a problem on the east coast."	Natureserve	Injurious species	Yes
64	Charadrius melodus	Plover, piping	Vertebrate	Bird	FWS Region 5: Northeast	AL, AR, CO, CT, DE, FL, GA, IA, IL, IN, KS, KY, LA, MA, MD, ME, MI, MN, MO, MS, MT, NC, ND, NE, NH, NJ, NY, OH, OK, PA, RI, SC, SD, TN, TX, VA, WI, WY	6	Is the species sensitive to changes in chemical concentration (e.g. elevated atmospheric CO2, change in water pH, or dissolved oxygen tolerance)?			Chemistry	No
64	Charadrius melodus	Plover, piping	Vertebrate	Bird	FWS Region 5: Northeast	AL, AR, CO, CT, DE, FL, GA, IA, IL, IN, KS, KY, LA, MA, MD, ME, MI, MN, MO, MS, MT, NC, ND, NE, NH, NJ, NY, OH, OK, PA, RI, SC, SD, TN, TX, VA, WI, WY	7	Does the species rely on particular triggers for life cycle events (breeding, migration, color change) that are likely to become out of sync with seasonal changes in resource availability or environmental conditions (phenologic mismatch)?			Phenology	No
64	Charadrius melodus	Plover, piping	Vertebrate	Bird	FWS Region 5: Northeast	AL, AR, CO, CT, DE, FL, GA, IA, IL, IN, KS, KY, LA, MA, MD, ME, MI, MN, MO, MS, MT, NC, ND, NE, NH, NJ, NY, OH, OK, PA, RI, SC, SD, TN, TX, VA, WI, WY	8	Is the species is dependent on one or a few other species (e.g. host, pollinator, dominant food item) and may have limited alternatives if the required species declines due to climate change?			Obligate relationships	No
65	Chasiempis sandwichensis ibidis	Elepaio, Oahu	Vertebrate	Bird	FWS Region 1: Pacific	HI	1	Does the species have specialized thermal tolerance (e.g. pika, trout) or depend on habitat with an important temperature threshold (e.g. sea ice)?			Temperature	No
65	Chasiempis sandwichensis ibidis	Elepaio, Oahu	Vertebrate	Bird	FWS Region 1: Pacific	HI	2	Is the species dependent on habitat with specialized hydrology pattern (e.g. wetland, vernal pool, seasonal streams; sensitivity to drought)?			Hydrology	No
65	Chasiempis sandwichensis ibidis	Elepaio, Oahu	Vertebrate	Bird	FWS Region 1: Pacific	HI	3	Is the species or its habitat sensitive to or dependent upon a certain disturbance regime (e.g. old growth forest, fire-adapted system; seasonal floods)?	Miconia threatens species habitat. In a future with heavier rains the combination of miconia and increased precipitation could increase landslides that are detrimental to species habitat.	NatureServe	Disturbance	Yes
65	Chasiempis sandwichensis ibidis	Elepaio, Oahu	Vertebrate	Bird	FWS Region 1: Pacific	HI	4	Is the species or its habitat geographically restricted or confined by natural and/or anthropogenic barriers (e.g. mountain range, isolated soil type, coastal zone or island, or hemmed in by urban development)?	Species range is small and limited to <100-250 square km due to significant habitat destruction.	NatureServe	Isolation	Yes
65	Chasiempis sandwichensis ibidis	Elepaio, Oahu	Vertebrate	Bird	FWS Region 1: Pacific	HI	5	Is the species or its habitat threatened by the spread of invasive or “out of balance” species (e.g. weed, forest pest, novel disease)?	Species is susceptible to disease (specifically avain malaria and poxvirus) spread by mosquitoes which is likely to increase with warming temperatures.	NatureServe	Injurious species	Yes
65	Chasiempis sandwichensis ibidis	Elepaio, Oahu	Vertebrate	Bird	FWS Region 1: Pacific	HI	6	Is the species sensitive to changes in chemical concentration (e.g. elevated atmospheric CO2, change in water pH, or dissolved oxygen tolerance)?			Chemistry	No
65	Chasiempis sandwichensis ibidis	Elepaio, Oahu	Vertebrate	Bird	FWS Region 1: Pacific	HI	7	Does the species rely on particular triggers for life cycle events (breeding, migration, color change) that are likely to become out of sync with seasonal changes in resource availability or environmental conditions (phenologic mismatch)?			Phenology	No
65	Chasiempis sandwichensis ibidis	Elepaio, Oahu	Vertebrate	Bird	FWS Region 1: Pacific	HI	8	Is the species is dependent on one or a few other species (e.g. host, pollinator, dominant food item) and may have limited alternatives if the required species declines due to climate change?			Obligate relationships	No
66	Chasmistes brevirostris	Sucker, shortnose	Vertebrate	Fish	FWS Region 8: Pacific Southwest	CA, OR	1	Does the species have specialized thermal tolerance (e.g. pika, trout) or depend on habitat with an important temperature threshold (e.g. sea ice)?			Temperature	No
66	Chasmistes brevirostris	Sucker, shortnose	Vertebrate	Fish	FWS Region 8: Pacific Southwest	CA, OR	2	Is the species dependent on habitat with specialized hydrology pattern (e.g. wetland, vernal pool, seasonal streams; sensitivity to drought)?	"Low water levels continue to affect sucker habitats, especially in drought years (USFWS 2007). Drought is a threat because of its potential to cut off spawning habitat, to reduce rearing habitat and to increase disease, parasitism, and predation."	Natureserve	Hydrology	Yes
66	Chasmistes brevirostris	Sucker, shortnose	Vertebrate	Fish	FWS Region 8: Pacific Southwest	CA, OR	3	Is the species or its habitat sensitive to or dependent upon a certain disturbance regime (e.g. old growth forest, fire-adapted system; seasonal floods)?			Disturbance	No
66	Chasmistes brevirostris	Sucker, shortnose	Vertebrate	Fish	FWS Region 8: Pacific Southwest	CA, OR	4	Is the species or its habitat geographically restricted or confined by natural and/or anthropogenic barriers (e.g. mountain range, isolated soil type, coastal zone or island, or hemmed in by urban development)?	"Spawning migrations have declined significantly in recent years, due in part to alteration of habitat (especially damming). Chiloquin Dam, constructed in 1928 on the Sprague River, Oregon, cut off 85% of spawning range; recruitment has been essentially nonexistent in recent decades (Scoppettone and Vinyard 1991)."	Natureserve	Isolation	Yes
66	Chasmistes brevirostris	Sucker, shortnose	Vertebrate	Fish	FWS Region 8: Pacific Southwest	CA, OR	5	Is the species or its habitat threatened by the spread of invasive or “out of balance” species (e.g. weed, forest pest, novel disease)?	"Disease, parasites, and predation/competition by exotic fishes pose some risk, although the degree to which they affect the shortnose sucker is not quantified. Disease and parasites alone may not pose a significant risk, but paired with the impacts of adverse water quality, they can substantially affect sucker survival (USFWS 2007)."	Natureserve	Injurious species	Yes
66	Chasmistes brevirostris	Sucker, shortnose	Vertebrate	Fish	FWS Region 8: Pacific Southwest	CA, OR	6	Is the species sensitive to changes in chemical concentration (e.g. elevated atmospheric CO2, change in water pH, or dissolved oxygen tolerance)?	"Human-caused increases in nutrient inputs to Upper Klamath Lake have resulted in massive summer and fall blooms of cyanobacteria and elevated lake pH levels of 9.5-10.5, which in turn have led to mass mortalities and curtailed reproduction of the shortnose and Lost River suckers (Falter and Cech 1991; G. Scoppettone, pers. comm., 1995). Fish kills also may result from low dissolved oxygen levels…	Natureserve	Chemistry	Yes
66	Chasmistes brevirostris	Sucker, shortnose	Vertebrate	Fish	FWS Region 8: Pacific Southwest	CA, OR	7	Does the species rely on particular triggers for life cycle events (breeding, migration, color change) that are likely to become out of sync with seasonal changes in resource availability or environmental conditions (phenologic mismatch)?			Phenology	No
66	Chasmistes brevirostris	Sucker, shortnose	Vertebrate	Fish	FWS Region 8: Pacific Southwest	CA, OR	8	Is the species is dependent on one or a few other species (e.g. host, pollinator, dominant food item) and may have limited alternatives if the required species declines due to climate change?			Obligate relationships	No
67	Chasmistes cujus	Cui-ui	Vertebrate	Fish	FWS Region 8: Pacific Southwest	NV	1	Does the species have specialized thermal tolerance (e.g. pika, trout) or depend on habitat with an important temperature threshold (e.g. sea ice)?	Species is sensitive to changes in water temperature both during larval stages and as an adult. "In addition, the cui-ui spawn during the peak snowmelt from the Sierra Nevada, and larvae survival is affected by water temperature. Best success occurred in cooler temperature regimes (8.9-15°C) and much lower survival occurred at warmer temperatures (17.8-23.9°C)."	species recovery plan (http://ecos.fws.gov/docs/recovery_plan/920515a.pdf), http://serc.carleton.edu/NAGTWorkshops/complexsystems-agu10/ideas/fish_population.html	Temperature	Yes
67	Chasmistes cujus	Cui-ui	Vertebrate	Fish	FWS Region 8: Pacific Southwest	NV	2	Is the species dependent on habitat with specialized hydrology pattern (e.g. wetland, vernal pool, seasonal streams; sensitivity to drought)?	Species habitat is sensitive to changes in water levels, flow and salinity caused by drought and groundwater loss. Species is sensitive to in-stream connectivity and flow, and water levels in the river and lake.	species recovery plan (http://ecos.fws.gov/docs/recovery_plan/920515a.pdf)	Hydrology	Yes
67	Chasmistes cujus	Cui-ui	Vertebrate	Fish	FWS Region 8: Pacific Southwest	NV	3	Is the species or its habitat sensitive to or dependent upon a certain disturbance regime (e.g. old growth forest, fire-adapted system; seasonal floods)?	Stream sediment is very sensitive to erosion -- storms and flooding could be a problem and could lead to further sedimentation.	species recovery plan (http://ecos.fws.gov/docs/recovery_plan/920515a.pdf)	Disturbance	Yes
67	Chasmistes cujus	Cui-ui	Vertebrate	Fish	FWS Region 8: Pacific Southwest	NV	4	Is the species or its habitat geographically restricted or confined by natural and/or anthropogenic barriers (e.g. mountain range, isolated soil type, coastal zone or island, or hemmed in by urban development)?	Species has limited range extent of 250-1000 square km in one lake and the Trukee River as a result of the loss of another lake to drying. Formerly widespread west of continental divide.	NatureServe; species recovery plan (http://ecos.fws.gov/docs/recovery_plan/920515a.pdf)	Isolation	No
67	Chasmistes cujus	Cui-ui	Vertebrate	Fish	FWS Region 8: Pacific Southwest	NV	5	Is the species or its habitat threatened by the spread of invasive or “out of balance” species (e.g. weed, forest pest, novel disease)?			Injurious species	No
67	Chasmistes cujus	Cui-ui	Vertebrate	Fish	FWS Region 8: Pacific Southwest	NV	6	Is the species sensitive to changes in chemical concentration (e.g. elevated atmospheric CO2, change in water pH, or dissolved oxygen tolerance)?	Species is sensitive to changes in dissolved oxygen and pH	species recovery plan (http://ecos.fws.gov/docs/recovery_plan/920515a.pdf)	Chemistry	Yes
67	Chasmistes cujus	Cui-ui	Vertebrate	Fish	FWS Region 8: Pacific Southwest	NV	7	Does the species rely on particular triggers for life cycle events (breeding, migration, color change) that are likely to become out of sync with seasonal changes in resource availability or environmental conditions (phenologic mismatch)?			Phenology	No
67	Chasmistes cujus	Cui-ui	Vertebrate	Fish	FWS Region 8: Pacific Southwest	NV	8	Is the species is dependent on one or a few other species (e.g. host, pollinator, dominant food item) and may have limited alternatives if the required species declines due to climate change?			Obligate relationships	No
68 (Downlisted)	Chasmistes liorus	Sucker, June	Vertebrate	Fish	FWS Region 6: Mountain Prairie	UT	1	Does the species have specialized thermal tolerance (e.g. pika, trout) or depend on habitat with an important temperature threshold (e.g. sea ice)?			Temperature	No
68 (Downlisted)	Chasmistes liorus	Sucker, June	Vertebrate	Fish	FWS Region 6: Mountain Prairie	UT	2	Is the species dependent on habitat with specialized hydrology pattern (e.g. wetland, vernal pool, seasonal streams; sensitivity to drought)?			Hydrology	No
68 (Downlisted)	Chasmistes liorus	Sucker, June	Vertebrate	Fish	FWS Region 6: Mountain Prairie	UT	3	Is the species or its habitat sensitive to or dependent upon a certain disturbance regime (e.g. old growth forest, fire-adapted system; seasonal floods)?	Droughts in the past have severly impacted species.	recovery plan (http://ecos.fws.gov/docs/recovery_plan/990625.pdf)	Disturbance	Yes
68 (Downlisted)	Chasmistes liorus	Sucker, June	Vertebrate	Fish	FWS Region 6: Mountain Prairie	UT	4	Is the species or its habitat geographically restricted or confined by natural and/or anthropogenic barriers (e.g. mountain range, isolated soil type, coastal zone or island, or hemmed in by urban development)?	Endemic to Utah Lake, Utah. Provo River, which feeds the lake, is blocked upstream by the Tanner Race Diversion Dam.	recovery plan (http://ecos.fws.gov/docs/recovery_plan/990625.pdf)	Isolation	Yes
68 (Downlisted)	Chasmistes liorus	Sucker, June	Vertebrate	Fish	FWS Region 6: Mountain Prairie	UT	5	Is the species or its habitat threatened by the spread of invasive or “out of balance” species (e.g. weed, forest pest, novel disease)?	"Predation and/or competition by nonnative fish species…[have] reduce[d] recent recruitment of June sucker."	recovery plan (http://ecos.fws.gov/docs/recovery_plan/990625.pdf)	Injurious species	Yes
68 (Downlisted)	Chasmistes liorus	Sucker, June	Vertebrate	Fish	FWS Region 6: Mountain Prairie	UT	6	Is the species sensitive to changes in chemical concentration (e.g. elevated atmospheric CO2, change in water pH, or dissolved oxygen tolerance)?	"In the summer of 1992, while Provo River flows were less than 10 cfs, several adult June sucker died from low dissolved oxygen levels. Low dissolved oxygen levels, created by reduced river flows, may also cause mortality in eggs or larval June sucker."	recovery plan (http://ecos.fws.gov/docs/recovery_plan/990625.pdf)	Chemistry	Yes
68 (Downlisted)	Chasmistes liorus	Sucker, June	Vertebrate	Fish	FWS Region 6: Mountain Prairie	UT	7	Does the species rely on particular triggers for life cycle events (breeding, migration, color change) that are likely to become out of sync with seasonal changes in resource availability or environmental conditions (phenologic mismatch)?	Warmer water temperatures prior to spring runoff, due to water storage and early diversions, may cause early June sucker migrations, forcing Utah and June suckers to spawn at the same time, possibly resulting in competition for spawning sites and hybridization.	recovery plan (http://ecos.fws.gov/docs/recovery_plan/990625.pdf)	Phenology	Yes
68 (Downlisted)	Chasmistes liorus	Sucker, June	Vertebrate	Fish	FWS Region 6: Mountain Prairie	UT	8	Is the species is dependent on one or a few other species (e.g. host, pollinator, dominant food item) and may have limited alternatives if the required species declines due to climate change?			Obligate relationships	No
69	Chelonia mydas	Sea turtle, green	Vertebrate	Reptile	FWS Region 4: Southeast	FL	1	Does the species have specialized thermal tolerance (e.g. pika, trout) or depend on habitat with an important temperature threshold (e.g. sea ice)?	"In the north, juveniles experience periodic mortality due to cold-stunning associated with rapid temperature declines in fall." Also, eggs incubated below a pivotal temperature, which may vary among populations produce primarily males, and eggs incubated above the pivotal temperature produce primarily females.	Natureserve	Temperature	Yes
69	Chelonia mydas	Sea turtle, green	Vertebrate	Reptile	FWS Region 4: Southeast	FL	2	Is the species dependent on habitat with specialized hydrology pattern (e.g. wetland, vernal pool, seasonal streams; sensitivity to drought)?			Hydrology	No
69	Chelonia mydas	Sea turtle, green	Vertebrate	Reptile	FWS Region 4: Southeast	FL	3	Is the species or its habitat sensitive to or dependent upon a certain disturbance regime (e.g. old growth forest, fire-adapted system; seasonal floods)?	Females deposit egg clutches on beaches where a deep nest cavity can be dug above the high water line. Erosion of nesting beaches can result in partial or total loss of suitable nesting habitat. Erosion rates are influenced by dynamic coastal processes, including sea level rise.	Natureserve and http://www.fws.gov/verobeach/MSRPPDFs/GreenSeaTurtle.pdf	Disturbance	Yes
69	Chelonia mydas	Sea turtle, green	Vertebrate	Reptile	FWS Region 4: Southeast	FL	4	Is the species or its habitat geographically restricted or confined by natural and/or anthropogenic barriers (e.g. mountain range, isolated soil type, coastal zone or island, or hemmed in by urban development)?	Beach nesting habitat is restricted by development.	Natureserve	Isolation	Yes
69	Chelonia mydas	Sea turtle, green	Vertebrate	Reptile	FWS Region 4: Southeast	FL	5	Is the species or its habitat threatened by the spread of invasive or “out of balance” species (e.g. weed, forest pest, novel disease)?	Non-native, "less-stabilizing vegetation can lead to increased erosion and degradation of suitable nesting habitat. Exotic vegetation may also form impenetrable root mats which can prevent proper nest cavity excavation, invade and desiccate eggs, or trap hatchlings. The Australian pine (Casuarina spp.) is particularly detrimental." Also, predators, particularly exotics such as fire ants (Solenops…	recovery plan: http://www.fws.gov/verobeach/MSRPPDFs/GreenSeaTurtle.pdf	Injurious species	Yes
69	Chelonia mydas	Sea turtle, green	Vertebrate	Reptile	FWS Region 4: Southeast	FL	6	Is the species sensitive to changes in chemical concentration (e.g. elevated atmospheric CO2, change in water pH, or dissolved oxygen tolerance)?			Chemistry	No
69	Chelonia mydas	Sea turtle, green	Vertebrate	Reptile	FWS Region 4: Southeast	FL	7	Does the species rely on particular triggers for life cycle events (breeding, migration, color change) that are likely to become out of sync with seasonal changes in resource availability or environmental conditions (phenologic mismatch)?			Phenology	No
69	Chelonia mydas	Sea turtle, green	Vertebrate	Reptile	FWS Region 4: Southeast	FL	8	Is the species is dependent on one or a few other species (e.g. host, pollinator, dominant food item) and may have limited alternatives if the required species declines due to climate change?			Obligate relationships	No
70	Chrosomus saylori	Dace, laurel	Vertebrate	Fish	FWS Region 4: Southeast	TN	1	Does the species have specialized thermal tolerance (e.g. pika, trout) or depend on habitat with an important temperature threshold (e.g. sea ice)?	Laurel dace are thought to be sensitive to both water temperature and siltation. Uses waters of less than 26C	recovery plan: http://ecos.fws.gov/docs/recovery_plan/LaurelDaceRecoveryPlan%2020150114.pdf	Temperature	Yes
70	Chrosomus saylori	Dace, laurel	Vertebrate	Fish	FWS Region 4: Southeast	TN	2	Is the species dependent on habitat with specialized hydrology pattern (e.g. wetland, vernal pool, seasonal streams; sensitivity to drought)?			Hydrology	No
70	Chrosomus saylori	Dace, laurel	Vertebrate	Fish	FWS Region 4: Southeast	TN	3	Is the species or its habitat sensitive to or dependent upon a certain disturbance regime (e.g. old growth forest, fire-adapted system; seasonal floods)?	Sensitive to siltation due to erosion.	recovery plan: http://ecos.fws.gov/docs/recovery_plan/LaurelDaceRecoveryPlan%2020150114.pdf	Disturbance	Yes
70	Chrosomus saylori	Dace, laurel	Vertebrate	Fish	FWS Region 4: Southeast	TN	4	Is the species or its habitat geographically restricted or confined by natural and/or anthropogenic barriers (e.g. mountain range, isolated soil type, coastal zone or island, or hemmed in by urban development)?	Headwaters stream species, isolated.	Natureserve	Isolation	Yes
70	Chrosomus saylori	Dace, laurel	Vertebrate	Fish	FWS Region 4: Southeast	TN	5	Is the species or its habitat threatened by the spread of invasive or “out of balance” species (e.g. weed, forest pest, novel disease)?	Main exotics threat is other introduced fish, pathway is flooding of farm ponds	recovery plan: http://ecos.fws.gov/docs/recovery_plan/LaurelDaceRecoveryPlan%2020150114.pdf	Injurious species	Yes
70	Chrosomus saylori	Dace, laurel	Vertebrate	Fish	FWS Region 4: Southeast	TN	6	Is the species sensitive to changes in chemical concentration (e.g. elevated atmospheric CO2, change in water pH, or dissolved oxygen tolerance)?			Chemistry	No
70	Chrosomus saylori	Dace, laurel	Vertebrate	Fish	FWS Region 4: Southeast	TN	7	Does the species rely on particular triggers for life cycle events (breeding, migration, color change) that are likely to become out of sync with seasonal changes in resource availability or environmental conditions (phenologic mismatch)?			Phenology	No
70	Chrosomus saylori	Dace, laurel	Vertebrate	Fish	FWS Region 4: Southeast	TN	8	Is the species is dependent on one or a few other species (e.g. host, pollinator, dominant food item) and may have limited alternatives if the required species declines due to climate change?			Obligate relationships	No
71	Cicindela nevadica lincolniana	Tiger beetle, Salt Creek	Invertebrate	Arthropod	FWS Region 6: Mountain Prairie	NE	1	Does the species have specialized thermal tolerance (e.g. pika, trout) or depend on habitat with an important temperature threshold (e.g. sea ice)?			Temperature	No
71	Cicindela nevadica lincolniana	Tiger beetle, Salt Creek	Invertebrate	Arthropod	FWS Region 6: Mountain Prairie	NE	2	Is the species dependent on habitat with specialized hydrology pattern (e.g. wetland, vernal pool, seasonal streams; sensitivity to drought)?	"The Salt Creek tiger beetle is adapted to brief periods of high water inundation and highly saline conditions (Spomer and Higley 1993)."	2009 recovery plan (http://ecos.fws.gov/docs/recovery_plan/Salt%20Creek%20Tiger%20Beetle%20recovery%20outline_02-20-2009.pdf)	Hydrology	Yes
71	Cicindela nevadica lincolniana	Tiger beetle, Salt Creek	Invertebrate	Arthropod	FWS Region 6: Mountain Prairie	NE	3	Is the species or its habitat sensitive to or dependent upon a certain disturbance regime (e.g. old growth forest, fire-adapted system; seasonal floods)?	"Potential stochastic events of greatest concern may include: (1) heavy rain storms and severe flooding which drown and scour larvae away, dilute salinity, and result in sediment deposition."	2009 recovery plan (http://ecos.fws.gov/docs/recovery_plan/Salt%20Creek%20Tiger%20Beetle%20recovery%20outline_02-20-2009.pdf)	Disturbance	Yes
71	Cicindela nevadica lincolniana	Tiger beetle, Salt Creek	Invertebrate	Arthropod	FWS Region 6: Mountain Prairie	NE	4	Is the species or its habitat geographically restricted or confined by natural and/or anthropogenic barriers (e.g. mountain range, isolated soil type, coastal zone or island, or hemmed in by urban development)?	"Restricted to several inland salt marshes near Lincoln, Nebraska. Extremely limited range, probably one metapopulation or perhaps fragments of one."	Natureserve	Isolation	Yes
71	Cicindela nevadica lincolniana	Tiger beetle, Salt Creek	Invertebrate	Arthropod	FWS Region 6: Mountain Prairie	NE	5	Is the species or its habitat threatened by the spread of invasive or “out of balance” species (e.g. weed, forest pest, novel disease)?	"The loss of travel corridors along Little Salt Creek has occurred as a result of bank sloughing, establishment of invasive plants, and loss of mid-stream gravel bars."	2009 recovery plan (http://ecos.fws.gov/docs/recovery_plan/Salt%20Creek%20Tiger%20Beetle%20recovery%20outline_02-20-2009.pdf)	Injurious species	Yes
71	Cicindela nevadica lincolniana	Tiger beetle, Salt Creek	Invertebrate	Arthropod	FWS Region 6: Mountain Prairie	NE	6	Is the species sensitive to changes in chemical concentration (e.g. elevated atmospheric CO2, change in water pH, or dissolved oxygen tolerance)?			Chemistry	No
71	Cicindela nevadica lincolniana	Tiger beetle, Salt Creek	Invertebrate	Arthropod	FWS Region 6: Mountain Prairie	NE	7	Does the species rely on particular triggers for life cycle events (breeding, migration, color change) that are likely to become out of sync with seasonal changes in resource availability or environmental conditions (phenologic mismatch)?			Phenology	No
71	Cicindela nevadica lincolniana	Tiger beetle, Salt Creek	Invertebrate	Arthropod	FWS Region 6: Mountain Prairie	NE	8	Is the species is dependent on one or a few other species (e.g. host, pollinator, dominant food item) and may have limited alternatives if the required species declines due to climate change?			Obligate relationships	No
72	Cicindela ohlone	Tiger beetle, Ohlone	Invertebrate	Arthropod	FWS Region 8: Pacific Southwest	CA	1	Does the species have specialized thermal tolerance (e.g. pika, trout) or depend on habitat with an important temperature threshold (e.g. sea ice)?			Temperature	No
72	Cicindela ohlone	Tiger beetle, Ohlone	Invertebrate	Arthropod	FWS Region 8: Pacific Southwest	CA	2	Is the species dependent on habitat with specialized hydrology pattern (e.g. wetland, vernal pool, seasonal streams; sensitivity to drought)?	"Individual species of tiger beetle are generally highly habitat-specific because of oviposition and larval sensitivity to soil moisture, composition, and temperature (Pearson 1988, Pearson and Cassola 1992, Kaulbars and Freitag 1993)." _x000D_	five-year review (http://ecos.fws.gov/docs/five_year_review/doc3220.pdf)	Hydrology	Yes
72	Cicindela ohlone	Tiger beetle, Ohlone	Invertebrate	Arthropod	FWS Region 8: Pacific Southwest	CA	3	Is the species or its habitat sensitive to or dependent upon a certain disturbance regime (e.g. old growth forest, fire-adapted system; seasonal floods)?	In order to maintain its grassland habitat, the species is dependant on a regular grazing or fire regime.	five-year review (http://ecos.fws.gov/docs/five_year_review/doc3220.pdf)	Disturbance	Yes
72	Cicindela ohlone	Tiger beetle, Ohlone	Invertebrate	Arthropod	FWS Region 8: Pacific Southwest	CA	4	Is the species or its habitat geographically restricted or confined by natural and/or anthropogenic barriers (e.g. mountain range, isolated soil type, coastal zone or island, or hemmed in by urban development)?	Area of occupancy is less than 25 acres in one California county.	Natureserve	Isolation	Yes
72	Cicindela ohlone	Tiger beetle, Ohlone	Invertebrate	Arthropod	FWS Region 8: Pacific Southwest	CA	5	Is the species or its habitat threatened by the spread of invasive or “out of balance” species (e.g. weed, forest pest, novel disease)?	The invasion of nonnative plants threatens the little coastal terrace prairie habitat that remains for this _x000D_ species.	five-year review (http://ecos.fws.gov/docs/five_year_review/doc3220.pdf)	Injurious species	Yes
72	Cicindela ohlone	Tiger beetle, Ohlone	Invertebrate	Arthropod	FWS Region 8: Pacific Southwest	CA	6	Is the species sensitive to changes in chemical concentration (e.g. elevated atmospheric CO2, change in water pH, or dissolved oxygen tolerance)?			Chemistry	No
72	Cicindela ohlone	Tiger beetle, Ohlone	Invertebrate	Arthropod	FWS Region 8: Pacific Southwest	CA	7	Does the species rely on particular triggers for life cycle events (breeding, migration, color change) that are likely to become out of sync with seasonal changes in resource availability or environmental conditions (phenologic mismatch)?			Phenology	No
72	Cicindela ohlone	Tiger beetle, Ohlone	Invertebrate	Arthropod	FWS Region 8: Pacific Southwest	CA	8	Is the species is dependent on one or a few other species (e.g. host, pollinator, dominant food item) and may have limited alternatives if the required species declines due to climate change?			Obligate relationships	No
73	Cicindelidia floridana	Miami tiger beetle	Invertebrate	Arthropod	FWS Region 4: Southeast	FL	1	Does the species have specialized thermal tolerance (e.g. pika, trout) or depend on habitat with an important temperature threshold (e.g. sea ice)?		listing decision: https://www.gpo.gov/fdsys/pkg/FR-2016-10-05/pdf/2016-23945.pdf	Temperature	No
73	Cicindelidia floridana	Miami tiger beetle	Invertebrate	Arthropod	FWS Region 4: Southeast	FL	2	Is the species dependent on habitat with specialized hydrology pattern (e.g. wetland, vernal pool, seasonal streams; sensitivity to drought)?		listing decision: https://www.gpo.gov/fdsys/pkg/FR-2016-10-05/pdf/2016-23945.pdf	Hydrology	No
73	Cicindelidia floridana	Miami tiger beetle	Invertebrate	Arthropod	FWS Region 4: Southeast	FL	3	Is the species or its habitat sensitive to or dependent upon a certain disturbance regime (e.g. old growth forest, fire-adapted system; seasonal floods)?	Requires periodic fire to maintain habitat and open patches for thermoregulation.	listing decision: https://www.gpo.gov/fdsys/pkg/FR-2016-10-05/pdf/2016-23945.pdf	Disturbance	Yes
73	Cicindelidia floridana	Miami tiger beetle	Invertebrate	Arthropod	FWS Region 4: Southeast	FL	4	Is the species or its habitat geographically restricted or confined by natural and/or anthropogenic barriers (e.g. mountain range, isolated soil type, coastal zone or island, or hemmed in by urban development)?	Narrow restricted range; associated with pine rocklands habitat with quartz sand.	listing decision: https://www.gpo.gov/fdsys/pkg/FR-2016-10-05/pdf/2016-23945.pdf	Isolation	Yes
73	Cicindelidia floridana	Miami tiger beetle	Invertebrate	Arthropod	FWS Region 4: Southeast	FL	5	Is the species or its habitat threatened by the spread of invasive or “out of balance” species (e.g. weed, forest pest, novel disease)?	Major invasive plant problem, which intensifies fire regime, in addition to altering cover	listing decision: https://www.gpo.gov/fdsys/pkg/FR-2016-10-05/pdf/2016-23945.pdf	Injurious species	Yes
73	Cicindelidia floridana	Miami tiger beetle	Invertebrate	Arthropod	FWS Region 4: Southeast	FL	6	Is the species sensitive to changes in chemical concentration (e.g. elevated atmospheric CO2, change in water pH, or dissolved oxygen tolerance)?		listing decision: https://www.gpo.gov/fdsys/pkg/FR-2016-10-05/pdf/2016-23945.pdf	Chemistry	No
73	Cicindelidia floridana	Miami tiger beetle	Invertebrate	Arthropod	FWS Region 4: Southeast	FL	7	Does the species rely on particular triggers for life cycle events (breeding, migration, color change) that are likely to become out of sync with seasonal changes in resource availability or environmental conditions (phenologic mismatch)?		listing decision: https://www.gpo.gov/fdsys/pkg/FR-2016-10-05/pdf/2016-23945.pdf	Phenology	No
73	Cicindelidia floridana	Miami tiger beetle	Invertebrate	Arthropod	FWS Region 4: Southeast	FL	8	Is the species is dependent on one or a few other species (e.g. host, pollinator, dominant food item) and may have limited alternatives if the required species declines due to climate change?		listing decision: https://www.gpo.gov/fdsys/pkg/FR-2016-10-05/pdf/2016-23945.pdf	Obligate relationships	No
74	Cicurina baronia	Meshweaver, Robber Baron Cave	Invertebrate	Arthropod	FWS Region 2: Southwest	TX	1	Does the species have specialized thermal tolerance (e.g. pika, trout) or depend on habitat with an important temperature threshold (e.g. sea ice)?	Species withstands narrow range of stable temperature and moisture conditions.		Temperature	Yes
74	Cicurina baronia	Meshweaver, Robber Baron Cave	Invertebrate	Arthropod	FWS Region 2: Southwest	TX	2	Is the species dependent on habitat with specialized hydrology pattern (e.g. wetland, vernal pool, seasonal streams; sensitivity to drought)?	Cave habitat is very humid; dependent on specific moisture regime and infiltration by water. Too much is a problem and too little is also a problem. Changes in rainfall amounts will also affect nutrients washed into cave which the species depends on.	FWS five-year review (http://ecos.fws.gov/docs/recovery_plan/Final%202001%20Bexar%20Co%20Invertebrates%20Rec%20Plan_1.pdf)	Hydrology	Yes
74	Cicurina baronia	Meshweaver, Robber Baron Cave	Invertebrate	Arthropod	FWS Region 2: Southwest	TX	3	Is the species or its habitat sensitive to or dependent upon a certain disturbance regime (e.g. old growth forest, fire-adapted system; seasonal floods)?	Disturbance to plant community above caves can affect moisture balance and allow for invasive of red fire ants, increased heavy precipitation events can cause flooding in the cave,	FWS five-year review (http://ecos.fws.gov/docs/recovery_plan/Final%202001%20Bexar%20Co%20Invertebrates%20Rec%20Plan_1.pdf)	Disturbance	Yes
74	Cicurina baronia	Meshweaver, Robber Baron Cave	Invertebrate	Arthropod	FWS Region 2: Southwest	TX	4	Is the species or its habitat geographically restricted or confined by natural and/or anthropogenic barriers (e.g. mountain range, isolated soil type, coastal zone or island, or hemmed in by urban development)?	Known from a single locality, Robber Baron Cave in Bexar County, Texas. Very restricted range.	FWS five-year review (http://ecos.fws.gov/docs/recovery_plan/Final%202001%20Bexar%20Co%20Invertebrates%20Rec%20Plan_1.pdf)	Isolation	Yes
74	Cicurina baronia	Meshweaver, Robber Baron Cave	Invertebrate	Arthropod	FWS Region 2: Southwest	TX	5	Is the species or its habitat threatened by the spread of invasive or “out of balance” species (e.g. weed, forest pest, novel disease)?	May increase range of red fire ant, and hot dry weather may also encourage the ant to move into caves to cool off.	FWS five-year review (http://ecos.fws.gov/docs/recovery_plan/Final%202001%20Bexar%20Co%20Invertebrates%20Rec%20Plan_1.pdf)	Injurious species	Yes
74	Cicurina baronia	Meshweaver, Robber Baron Cave	Invertebrate	Arthropod	FWS Region 2: Southwest	TX	6	Is the species sensitive to changes in chemical concentration (e.g. elevated atmospheric CO2, change in water pH, or dissolved oxygen tolerance)?			Chemistry	No
74	Cicurina baronia	Meshweaver, Robber Baron Cave	Invertebrate	Arthropod	FWS Region 2: Southwest	TX	7	Does the species rely on particular triggers for life cycle events (breeding, migration, color change) that are likely to become out of sync with seasonal changes in resource availability or environmental conditions (phenologic mismatch)?			Phenology	No
74	Cicurina baronia	Meshweaver, Robber Baron Cave	Invertebrate	Arthropod	FWS Region 2: Southwest	TX	8	Is the species is dependent on one or a few other species (e.g. host, pollinator, dominant food item) and may have limited alternatives if the required species declines due to climate change?			Obligate relationships	No
75	Cicurina madla	Meshweaver, Madla's Cave	Invertebrate	Arthropod	FWS Region 2: Southwest	TX	1	Does the species have specialized thermal tolerance (e.g. pika, trout) or depend on habitat with an important temperature threshold (e.g. sea ice)?	Species is used to narrow range of stable temperature and moisture conditions.	FWS five-year review (http://ecos.fws.gov/docs/recovery_plan/Final%202001%20Bexar%20Co%20Invertebrates%20Rec%20Plan_1.pdf)	Temperature	Yes
75	Cicurina madla	Meshweaver, Madla's Cave	Invertebrate	Arthropod	FWS Region 2: Southwest	TX	2	Is the species dependent on habitat with specialized hydrology pattern (e.g. wetland, vernal pool, seasonal streams; sensitivity to drought)?	Cave habitat is very humid; dependent on specific moisture regime and infiltration by water. Too much is a problem and too little is also a problem. Changes in rainfall amounts will also affect nutrients washed into cave which the species depends on.	FWS five-year review (http://ecos.fws.gov/docs/recovery_plan/Final%202001%20Bexar%20Co%20Invertebrates%20Rec%20Plan_1.pdf)	Hydrology	Yes
75	Cicurina madla	Meshweaver, Madla's Cave	Invertebrate	Arthropod	FWS Region 2: Southwest	TX	3	Is the species or its habitat sensitive to or dependent upon a certain disturbance regime (e.g. old growth forest, fire-adapted system; seasonal floods)?	Disturbance to plant community above caves can affect moisture balance and allow for invasive of red fire ants, increased heavy precipitation events can cause flooding in the cave	FWS five-year review (http://ecos.fws.gov/docs/recovery_plan/Final%202001%20Bexar%20Co%20Invertebrates%20Rec%20Plan_1.pdf)	Disturbance	Yes
75	Cicurina madla	Meshweaver, Madla's Cave	Invertebrate	Arthropod	FWS Region 2: Southwest	TX	4	Is the species or its habitat geographically restricted or confined by natural and/or anthropogenic barriers (e.g. mountain range, isolated soil type, coastal zone or island, or hemmed in by urban development)?	Species is found only in 8 caves in Texas	FWS five-year review (http://ecos.fws.gov/docs/recovery_plan/Final%202001%20Bexar%20Co%20Invertebrates%20Rec%20Plan_1.pdf)	Isolation	Yes
75	Cicurina madla	Meshweaver, Madla's Cave	Invertebrate	Arthropod	FWS Region 2: Southwest	TX	5	Is the species or its habitat threatened by the spread of invasive or “out of balance” species (e.g. weed, forest pest, novel disease)?	May increase range of red fire ant, and hot dry weather may also encourage the ant to move into caves to cool off.	FWS five-year review (http://ecos.fws.gov/docs/recovery_plan/Final%202001%20Bexar%20Co%20Invertebrates%20Rec%20Plan_1.pdf)	Injurious species	Yes
75	Cicurina madla	Meshweaver, Madla's Cave	Invertebrate	Arthropod	FWS Region 2: Southwest	TX	6	Is the species sensitive to changes in chemical concentration (e.g. elevated atmospheric CO2, change in water pH, or dissolved oxygen tolerance)?			Chemistry	No
75	Cicurina madla	Meshweaver, Madla's Cave	Invertebrate	Arthropod	FWS Region 2: Southwest	TX	7	Does the species rely on particular triggers for life cycle events (breeding, migration, color change) that are likely to become out of sync with seasonal changes in resource availability or environmental conditions (phenologic mismatch)?			Phenology	No
75	Cicurina madla	Meshweaver, Madla's Cave	Invertebrate	Arthropod	FWS Region 2: Southwest	TX	8	Is the species is dependent on one or a few other species (e.g. host, pollinator, dominant food item) and may have limited alternatives if the required species declines due to climate change?			Obligate relationships	No
76 (Delisted)	Cicurina venii	Meshweaver, Braken Bat Cave	Invertebrate	Arthropod	FWS Region 2: Southwest	TX	1	Does the species have specialized thermal tolerance (e.g. pika, trout) or depend on habitat with an important temperature threshold (e.g. sea ice)?	Species is used to narrow range of stable temperature and moisture conditions.	FWS five-year review (http://ecos.fws.gov/docs/recovery_plan/Final%202001%20Bexar%20Co%20Invertebrates%20Rec%20Plan_1.pdf)	Temperature	Yes
76 (Delisted)	Cicurina venii	Meshweaver, Braken Bat Cave	Invertebrate	Arthropod	FWS Region 2: Southwest	TX	2	Is the species dependent on habitat with specialized hydrology pattern (e.g. wetland, vernal pool, seasonal streams; sensitivity to drought)?	Cave habitat is very humid; dependent on specific moisture regime and infiltration by water. Too much is a problem and too little is also a problem. Changes in rainfall amounts will also affect nutrients washed into cave which the species depends on.	FWS five-year review (http://ecos.fws.gov/docs/recovery_plan/Final%202001%20Bexar%20Co%20Invertebrates%20Rec%20Plan_1.pdf)	Hydrology	Yes
76 (Delisted)	Cicurina venii	Meshweaver, Braken Bat Cave	Invertebrate	Arthropod	FWS Region 2: Southwest	TX	3	Is the species or its habitat sensitive to or dependent upon a certain disturbance regime (e.g. old growth forest, fire-adapted system; seasonal floods)?	Disturbance to plant community above caves can affect moisture balance and allow for invasive of red fire ants, increased heavy precipitation events can cause flooding in the cave	FWS five-year review (http://ecos.fws.gov/docs/recovery_plan/Final%202001%20Bexar%20Co%20Invertebrates%20Rec%20Plan_1.pdf)	Disturbance	Yes
76 (Delisted)	Cicurina venii	Meshweaver, Braken Bat Cave	Invertebrate	Arthropod	FWS Region 2: Southwest	TX	4	Is the species or its habitat geographically restricted or confined by natural and/or anthropogenic barriers (e.g. mountain range, isolated soil type, coastal zone or island, or hemmed in by urban development)?	Known to be found in 1 cave in Texas	NatureServe	Isolation	Yes
76 (Delisted)	Cicurina venii	Meshweaver, Braken Bat Cave	Invertebrate	Arthropod	FWS Region 2: Southwest	TX	5	Is the species or its habitat threatened by the spread of invasive or “out of balance” species (e.g. weed, forest pest, novel disease)?	May increase range of red fire ant, and hot dry weather may also encourage the ant to move into caves to cool off.	FWS five-year review (http://ecos.fws.gov/docs/recovery_plan/Final%202001%20Bexar%20Co%20Invertebrates%20Rec%20Plan_1.pdf)	Injurious species	Yes
76 (Delisted)	Cicurina venii	Meshweaver, Braken Bat Cave	Invertebrate	Arthropod	FWS Region 2: Southwest	TX	6	Is the species sensitive to changes in chemical concentration (e.g. elevated atmospheric CO2, change in water pH, or dissolved oxygen tolerance)?			Chemistry	No
76 (Delisted)	Cicurina venii	Meshweaver, Braken Bat Cave	Invertebrate	Arthropod	FWS Region 2: Southwest	TX	7	Does the species rely on particular triggers for life cycle events (breeding, migration, color change) that are likely to become out of sync with seasonal changes in resource availability or environmental conditions (phenologic mismatch)?			Phenology	No
76 (Delisted)	Cicurina venii	Meshweaver, Braken Bat Cave	Invertebrate	Arthropod	FWS Region 2: Southwest	TX	8	Is the species is dependent on one or a few other species (e.g. host, pollinator, dominant food item) and may have limited alternatives if the required species declines due to climate change?			Obligate relationships	No
77	Cicurina vespera	Meshweaver, Government Canyon Bat Cave	Invertebrate	Arthropod	FWS Region 2: Southwest	TX	1	Does the species have specialized thermal tolerance (e.g. pika, trout) or depend on habitat with an important temperature threshold (e.g. sea ice)?	"Terrestrial troglobites require stable temperatures and constant, high humidity (Barr 1968, Mitchell 1971b) . . . and have have lost the ability to detect and/or cope with more extreme temperatures (Mitchell 1971b)."	recovery plan (http://ecos.fws.gov/docs/recovery_plan/Final%202001%20Bexar%20Co%20Invertebrates%20Rec%20Plan_1.pdf)	Temperature	Yes
77	Cicurina vespera	Meshweaver, Government Canyon Bat Cave	Invertebrate	Arthropod	FWS Region 2: Southwest	TX	2	Is the species dependent on habitat with specialized hydrology pattern (e.g. wetland, vernal pool, seasonal streams; sensitivity to drought)?	Cave habitat is very humid; dependent on specific moisture regime and infiltration by water. Too much is a problem and too little is also a problem. Changes in rainfall amounts will also affect nutrients washed into cave which the species depends on.	recovery plan (http://ecos.fws.gov/docs/recovery_plan/Final%202001%20Bexar%20Co%20Invertebrates%20Rec%20Plan_1.pdf)	Hydrology	Yes
77	Cicurina vespera	Meshweaver, Government Canyon Bat Cave	Invertebrate	Arthropod	FWS Region 2: Southwest	TX	3	Is the species or its habitat sensitive to or dependent upon a certain disturbance regime (e.g. old growth forest, fire-adapted system; seasonal floods)?			Disturbance	No
77	Cicurina vespera	Meshweaver, Government Canyon Bat Cave	Invertebrate	Arthropod	FWS Region 2: Southwest	TX	4	Is the species or its habitat geographically restricted or confined by natural and/or anthropogenic barriers (e.g. mountain range, isolated soil type, coastal zone or island, or hemmed in by urban development)?	This cave spider is only known from one cave in Bexar County, Texas. Only a single specimen has ever been collected and its exact status is unknown.	Natureserve	Isolation	Yes
77	Cicurina vespera	Meshweaver, Government Canyon Bat Cave	Invertebrate	Arthropod	FWS Region 2: Southwest	TX	5	Is the species or its habitat threatened by the spread of invasive or “out of balance” species (e.g. weed, forest pest, novel disease)?	"Red-imported fire ants (RIFA) are a pervasive, non-native ant species . . . an aggressive predator and competitor that has spread across the southern United States."	recovery plan (http://ecos.fws.gov/docs/recovery_plan/Final%202001%20Bexar%20Co%20Invertebrates%20Rec%20Plan_1.pdf)	Injurious species	Yes
77	Cicurina vespera	Meshweaver, Government Canyon Bat Cave	Invertebrate	Arthropod	FWS Region 2: Southwest	TX	6	Is the species sensitive to changes in chemical concentration (e.g. elevated atmospheric CO2, change in water pH, or dissolved oxygen tolerance)?			Chemistry	No
77	Cicurina vespera	Meshweaver, Government Canyon Bat Cave	Invertebrate	Arthropod	FWS Region 2: Southwest	TX	7	Does the species rely on particular triggers for life cycle events (breeding, migration, color change) that are likely to become out of sync with seasonal changes in resource availability or environmental conditions (phenologic mismatch)?			Phenology	No
77	Cicurina vespera	Meshweaver, Government Canyon Bat Cave	Invertebrate	Arthropod	FWS Region 2: Southwest	TX	8	Is the species is dependent on one or a few other species (e.g. host, pollinator, dominant food item) and may have limited alternatives if the required species declines due to climate change?			Obligate relationships	No
78	Colinus virginianus ridgwayi	Bobwhite, masked	Vertebrate	Bird	FWS Region 2: Southwest	AZ	1	Does the species have specialized thermal tolerance (e.g. pika, trout) or depend on habitat with an important temperature threshold (e.g. sea ice)?	Temperature affects species reproductive success: "High temperatures in combination with dry atmospheric conditions may reduce the amount of thermally suitable habitat _x000D_ (Guthery et al. 2001c) as heat reduces the proportion of bobwhite hens that lay eggs and the proportion of males that produce sperm." Species may also be intolerant of cold wet temperatures if suitable cover is not availabl…	FWS five-year review (http://ecos.fws.gov/docs/five_year_review/doc4370.8.14.pdf)	Temperature	Yes
78	Colinus virginianus ridgwayi	Bobwhite, masked	Vertebrate	Bird	FWS Region 2: Southwest	AZ	2	Is the species dependent on habitat with specialized hydrology pattern (e.g. wetland, vernal pool, seasonal streams; sensitivity to drought)?	Species is sensitive to changes in precipitation: "Camou et al. (1998) found that masked bobwhite populations increased in 11 of 13 years when mean summer precipitation was >20 cm (7.9 in.), but declined in 13 of 14 years when mean summer precipitation was <20 cm." Species is adapted to time life cycle events such as reproduction to precipitation peaks.	FWS five-year review (http://ecos.fws.gov/docs/five_year_review/doc4370.8.14.pdf)	Hydrology	Yes
78	Colinus virginianus ridgwayi	Bobwhite, masked	Vertebrate	Bird	FWS Region 2: Southwest	AZ	3	Is the species or its habitat sensitive to or dependent upon a certain disturbance regime (e.g. old growth forest, fire-adapted system; seasonal floods)?	Species also does better with natural fire regime, but fire regime has been disrupted, changing native vegetation. Hurricanes and heavy monsoonal rains may also be a problem in some locations as the species nests on the ground and is susceptible to flooding.	FWS five-year review (http://ecos.fws.gov/docs/five_year_review/doc4370.8.14.pdf)	Disturbance	Yes
78	Colinus virginianus ridgwayi	Bobwhite, masked	Vertebrate	Bird	FWS Region 2: Southwest	AZ	4	Is the species or its habitat geographically restricted or confined by natural and/or anthropogenic barriers (e.g. mountain range, isolated soil type, coastal zone or island, or hemmed in by urban development)?			Isolation	No
78	Colinus virginianus ridgwayi	Bobwhite, masked	Vertebrate	Bird	FWS Region 2: Southwest	AZ	5	Is the species or its habitat threatened by the spread of invasive or “out of balance” species (e.g. weed, forest pest, novel disease)?	Habitat is threatened by invasive buffelgrass which was introduced because of its drought tolerance. While the species appears able to use this grass as cover it prefers native vegetation and more complexity in vegetation structure. Buffelgrass tends to form monocultures. Lehman's Lovegrass is another invasive with similar issues. Additionally, Captive flocks seem disease prone. Several diseases …	FWS five-year review (http://ecos.fws.gov/docs/five_year_review/doc4370.8.14.pdf)	Injurious species	Yes
78	Colinus virginianus ridgwayi	Bobwhite, masked	Vertebrate	Bird	FWS Region 2: Southwest	AZ	6	Is the species sensitive to changes in chemical concentration (e.g. elevated atmospheric CO2, change in water pH, or dissolved oxygen tolerance)?			Chemistry	No
78	Colinus virginianus ridgwayi	Bobwhite, masked	Vertebrate	Bird	FWS Region 2: Southwest	AZ	7	Does the species rely on particular triggers for life cycle events (breeding, migration, color change) that are likely to become out of sync with seasonal changes in resource availability or environmental conditions (phenologic mismatch)?	Species waits for monsoon season to initiate breeding. From the FWS 5 year review: As temperatures rise, the availability of smaller sized insects of the size suitable for consumption by chicks may become unsynchronized with the peak of quail hatch (N. Silvy pers. com. 2007). Grasshoppers, which are an important chick food, may already be occurring in a size too large to be effectively consumed b…	FWS five-year review (http://ecos.fws.gov/docs/five_year_review/doc4370.8.14.pdf)	Phenology	Yes
78	Colinus virginianus ridgwayi	Bobwhite, masked	Vertebrate	Bird	FWS Region 2: Southwest	AZ	8	Is the species is dependent on one or a few other species (e.g. host, pollinator, dominant food item) and may have limited alternatives if the required species declines due to climate change?			Obligate relationships	No
79	Patagioenas (fmr. Columba) inornata wetmorei	Pigeon, Puerto Rican plain	Vertebrate	Bird	FWS Region 4: Southeast	PR	1	Does the species have specialized thermal tolerance (e.g. pika, trout) or depend on habitat with an important temperature threshold (e.g. sea ice)?			Temperature	No
79	Patagioenas (fmr. Columba) inornata wetmorei	Pigeon, Puerto Rican plain	Vertebrate	Bird	FWS Region 4: Southeast	PR	2	Is the species dependent on habitat with specialized hydrology pattern (e.g. wetland, vernal pool, seasonal streams; sensitivity to drought)?			Hydrology	No
79	Patagioenas (fmr. Columba) inornata wetmorei	Pigeon, Puerto Rican plain	Vertebrate	Bird	FWS Region 4: Southeast	PR	3	Is the species or its habitat sensitive to or dependent upon a certain disturbance regime (e.g. old growth forest, fire-adapted system; seasonal floods)?	"Severe storms and hurricanes are potential threats" that"may destroy nesting areas and strip trees of fruits and seeds upon which the plain pigeons feed, potentially causing starvation of adult and young pigeons."	five-year review (http://ecos.fws.gov/docs/five_year_review/doc3952.pdf)	Disturbance	Yes
79	Patagioenas (fmr. Columba) inornata wetmorei	Pigeon, Puerto Rican plain	Vertebrate	Bird	FWS Region 4: Southeast	PR	4	Is the species or its habitat geographically restricted or confined by natural and/or anthropogenic barriers (e.g. mountain range, isolated soil type, coastal zone or island, or hemmed in by urban development)?	Endemic to Puerto Rico.	five-year review (http://ecos.fws.gov/docs/five_year_review/doc3952.pdf)	Isolation	Yes
79	Patagioenas (fmr. Columba) inornata wetmorei	Pigeon, Puerto Rican plain	Vertebrate	Bird	FWS Region 4: Southeast	PR	5	Is the species or its habitat threatened by the spread of invasive or “out of balance” species (e.g. weed, forest pest, novel disease)?	Impacted by predation from feral cats/rats. Not likely climate nexus.	five-year review (http://ecos.fws.gov/docs/five_year_review/doc3952.pdf)	Injurious species	No
79	Patagioenas (fmr. Columba) inornata wetmorei	Pigeon, Puerto Rican plain	Vertebrate	Bird	FWS Region 4: Southeast	PR	6	Is the species sensitive to changes in chemical concentration (e.g. elevated atmospheric CO2, change in water pH, or dissolved oxygen tolerance)?			Chemistry	No
79	Patagioenas (fmr. Columba) inornata wetmorei	Pigeon, Puerto Rican plain	Vertebrate	Bird	FWS Region 4: Southeast	PR	7	Does the species rely on particular triggers for life cycle events (breeding, migration, color change) that are likely to become out of sync with seasonal changes in resource availability or environmental conditions (phenologic mismatch)?			Phenology	No
79	Patagioenas (fmr. Columba) inornata wetmorei	Pigeon, Puerto Rican plain	Vertebrate	Bird	FWS Region 4: Southeast	PR	8	Is the species is dependent on one or a few other species (e.g. host, pollinator, dominant food item) and may have limited alternatives if the required species declines due to climate change?			Obligate relationships	No
80	Lemiox rimosus (fmr. Conradilla caelata)	Pearlymussel, birdwing	Invertebrate	Mollusk	FWS Region 4: Southeast	AL, TN, VA	1	Does the species have specialized thermal tolerance (e.g. pika, trout) or depend on habitat with an important temperature threshold (e.g. sea ice)?			Temperature	No
80	Lemiox rimosus (fmr. Conradilla caelata)	Pearlymussel, birdwing	Invertebrate	Mollusk	FWS Region 4: Southeast	AL, TN, VA	2	Is the species dependent on habitat with specialized hydrology pattern (e.g. wetland, vernal pool, seasonal streams; sensitivity to drought)?	Generally found in shallow waters, prone to dessication during drought.	recovery plan (http://ecos.fws.gov/docs/recovery_plan/060206a.pdf)	Hydrology	Yes
80	Lemiox rimosus (fmr. Conradilla caelata)	Pearlymussel, birdwing	Invertebrate	Mollusk	FWS Region 4: Southeast	AL, TN, VA	3	Is the species or its habitat sensitive to or dependent upon a certain disturbance regime (e.g. old growth forest, fire-adapted system; seasonal floods)?	Highly sensitive to sedimentation; requires silt-free substrate	recovery plan (http://ecos.fws.gov/docs/recovery_plan/060206a.pdf)	Disturbance	Yes
80	Lemiox rimosus (fmr. Conradilla caelata)	Pearlymussel, birdwing	Invertebrate	Mollusk	FWS Region 4: Southeast	AL, TN, VA	4	Is the species or its habitat geographically restricted or confined by natural and/or anthropogenic barriers (e.g. mountain range, isolated soil type, coastal zone or island, or hemmed in by urban development)?	Extant populations are isolated but original range was broad.	recovery plan (http://ecos.fws.gov/docs/recovery_plan/060206a.pdf)	Isolation	No
80	Lemiox rimosus (fmr. Conradilla caelata)	Pearlymussel, birdwing	Invertebrate	Mollusk	FWS Region 4: Southeast	AL, TN, VA	5	Is the species or its habitat threatened by the spread of invasive or “out of balance” species (e.g. weed, forest pest, novel disease)?			Injurious species	No
80	Lemiox rimosus (fmr. Conradilla caelata)	Pearlymussel, birdwing	Invertebrate	Mollusk	FWS Region 4: Southeast	AL, TN, VA	6	Is the species sensitive to changes in chemical concentration (e.g. elevated atmospheric CO2, change in water pH, or dissolved oxygen tolerance)?	Highly sensitive to oxygen deficit.	recovery plan (http://ecos.fws.gov/docs/recovery_plan/060206a.pdf)	Chemistry	Yes
80	Lemiox rimosus (fmr. Conradilla caelata)	Pearlymussel, birdwing	Invertebrate	Mollusk	FWS Region 4: Southeast	AL, TN, VA	7	Does the species rely on particular triggers for life cycle events (breeding, migration, color change) that are likely to become out of sync with seasonal changes in resource availability or environmental conditions (phenologic mismatch)?			Phenology	No
80	Lemiox rimosus (fmr. Conradilla caelata)	Pearlymussel, birdwing	Invertebrate	Mollusk	FWS Region 4: Southeast	AL, TN, VA	8	Is the species is dependent on one or a few other species (e.g. host, pollinator, dominant food item) and may have limited alternatives if the required species declines due to climate change?	Three known glochidial host species.	recovery plan (http://ecos.fws.gov/docs/recovery_plan/060206a.pdf)	Obligate relationships	Yes
81	Corvus kubaryi	Crow, Mariana	Vertebrate	Bird	FWS Region 1: Pacific	GU, NMI	1	Does the species have specialized thermal tolerance (e.g. pika, trout) or depend on habitat with an important temperature threshold (e.g. sea ice)?			Temperature	No
81	Corvus kubaryi	Crow, Mariana	Vertebrate	Bird	FWS Region 1: Pacific	GU, NMI	2	Is the species dependent on habitat with specialized hydrology pattern (e.g. wetland, vernal pool, seasonal streams; sensitivity to drought)?			Hydrology	No
81	Corvus kubaryi	Crow, Mariana	Vertebrate	Bird	FWS Region 1: Pacific	GU, NMI	3	Is the species or its habitat sensitive to or dependent upon a certain disturbance regime (e.g. old growth forest, fire-adapted system; seasonal floods)?	Typhoons have been known to destroy nests and cause premature fledging.	recovery plan (http://ecos.fws.gov/docs/recovery_plan/060111.pdf)	Disturbance	Yes
81	Corvus kubaryi	Crow, Mariana	Vertebrate	Bird	FWS Region 1: Pacific	GU, NMI	4	Is the species or its habitat geographically restricted or confined by natural and/or anthropogenic barriers (e.g. mountain range, isolated soil type, coastal zone or island, or hemmed in by urban development)?	Species exists only on Guam and Rota	http://ecos.fws.gov/docs/recovery_plan/060111.pdf	Isolation	Yes
81	Corvus kubaryi	Crow, Mariana	Vertebrate	Bird	FWS Region 1: Pacific	GU, NMI	5	Is the species or its habitat threatened by the spread of invasive or “out of balance” species (e.g. weed, forest pest, novel disease)?	"...introduced species such as disease organisms, cats (Felis catus), rats (Rattus spp.), black drongos (Dicrurus macrocercus), monitor lizards (Varanus indicus), and brown treesnakes (Boiga _x000D_ irregularis) have all been suggested as factors in the population decline of this species."	http://ecos.fws.gov/docs/recovery_plan/060111.pdf	Injurious species	Yes
81	Corvus kubaryi	Crow, Mariana	Vertebrate	Bird	FWS Region 1: Pacific	GU, NMI	6	Is the species sensitive to changes in chemical concentration (e.g. elevated atmospheric CO2, change in water pH, or dissolved oxygen tolerance)?			Chemistry	No
81	Corvus kubaryi	Crow, Mariana	Vertebrate	Bird	FWS Region 1: Pacific	GU, NMI	7	Does the species rely on particular triggers for life cycle events (breeding, migration, color change) that are likely to become out of sync with seasonal changes in resource availability or environmental conditions (phenologic mismatch)?			Phenology	No
81	Corvus kubaryi	Crow, Mariana	Vertebrate	Bird	FWS Region 1: Pacific	GU, NMI	8	Is the species is dependent on one or a few other species (e.g. host, pollinator, dominant food item) and may have limited alternatives if the required species declines due to climate change?			Obligate relationships	No
82	Corynorhinus townsendii ingens	Bat, Ozark big-eared	Vertebrate	Mammal	FWS Region 2: Southwest	AR, MO, OK	1	Does the species have specialized thermal tolerance (e.g. pika, trout) or depend on habitat with an important temperature threshold (e.g. sea ice)?			Temperature	No
82	Corynorhinus townsendii ingens	Bat, Ozark big-eared	Vertebrate	Mammal	FWS Region 2: Southwest	AR, MO, OK	2	Is the species dependent on habitat with specialized hydrology pattern (e.g. wetland, vernal pool, seasonal streams; sensitivity to drought)?			Hydrology	No
82	Corynorhinus townsendii ingens	Bat, Ozark big-eared	Vertebrate	Mammal	FWS Region 2: Southwest	AR, MO, OK	3	Is the species or its habitat sensitive to or dependent upon a certain disturbance regime (e.g. old growth forest, fire-adapted system; seasonal floods)?	Requires mature hardwood forests (foraging habitat) in close proximity to roosting caves.	Natureserve	Disturbance	Yes
82	Corynorhinus townsendii ingens	Bat, Ozark big-eared	Vertebrate	Mammal	FWS Region 2: Southwest	AR, MO, OK	4	Is the species or its habitat geographically restricted or confined by natural and/or anthropogenic barriers (e.g. mountain range, isolated soil type, coastal zone or island, or hemmed in by urban development)?			Isolation	No
82	Corynorhinus townsendii ingens	Bat, Ozark big-eared	Vertebrate	Mammal	FWS Region 2: Southwest	AR, MO, OK	5	Is the species or its habitat threatened by the spread of invasive or “out of balance” species (e.g. weed, forest pest, novel disease)?			Injurious species	No
82	Corynorhinus townsendii ingens	Bat, Ozark big-eared	Vertebrate	Mammal	FWS Region 2: Southwest	AR, MO, OK	6	Is the species sensitive to changes in chemical concentration (e.g. elevated atmospheric CO2, change in water pH, or dissolved oxygen tolerance)?			Chemistry	No
82	Corynorhinus townsendii ingens	Bat, Ozark big-eared	Vertebrate	Mammal	FWS Region 2: Southwest	AR, MO, OK	7	Does the species rely on particular triggers for life cycle events (breeding, migration, color change) that are likely to become out of sync with seasonal changes in resource availability or environmental conditions (phenologic mismatch)?			Phenology	No
82	Corynorhinus townsendii ingens	Bat, Ozark big-eared	Vertebrate	Mammal	FWS Region 2: Southwest	AR, MO, OK	8	Is the species is dependent on one or a few other species (e.g. host, pollinator, dominant food item) and may have limited alternatives if the required species declines due to climate change?			Obligate relationships	No
83	Corynorhinus townsendii virginianus	Bat, Virginia big-eared	Vertebrate	Mammal	FWS Region 5: Northeast	KY, NC, VA, WV	1	Does the species have specialized thermal tolerance (e.g. pika, trout) or depend on habitat with an important temperature threshold (e.g. sea ice)?	"Prefers cool, well-ventilated caves for hibernation (Matthews and Moseley 1990); roost sites are often near cave entrances or in places where there is considerable air movement (Handley 1991)."	Natureserve	Temperature	Yes
83	Corynorhinus townsendii virginianus	Bat, Virginia big-eared	Vertebrate	Mammal	FWS Region 5: Northeast	KY, NC, VA, WV	2	Is the species dependent on habitat with specialized hydrology pattern (e.g. wetland, vernal pool, seasonal streams; sensitivity to drought)?			Hydrology	No
83	Corynorhinus townsendii virginianus	Bat, Virginia big-eared	Vertebrate	Mammal	FWS Region 5: Northeast	KY, NC, VA, WV	3	Is the species or its habitat sensitive to or dependent upon a certain disturbance regime (e.g. old growth forest, fire-adapted system; seasonal floods)?			Disturbance	No
83	Corynorhinus townsendii virginianus	Bat, Virginia big-eared	Vertebrate	Mammal	FWS Region 5: Northeast	KY, NC, VA, WV	4	Is the species or its habitat geographically restricted or confined by natural and/or anthropogenic barriers (e.g. mountain range, isolated soil type, coastal zone or island, or hemmed in by urban development)?			Isolation	No
83	Corynorhinus townsendii virginianus	Bat, Virginia big-eared	Vertebrate	Mammal	FWS Region 5: Northeast	KY, NC, VA, WV	5	Is the species or its habitat threatened by the spread of invasive or “out of balance” species (e.g. weed, forest pest, novel disease)?	"Forest defoliation by gypsy moth could adversely affect native Lepidoptera and impact bat population (Sample and Whitmore 1993)." Also, heavy infestations of parasitic strebilid flies have been noted in some areas alough their impact on population survival is unclear.	Natureserve and five-year review (http://ecos.fws.gov/docs/five_year_review/doc1963.pdf)	Injurious species	Yes
83	Corynorhinus townsendii virginianus	Bat, Virginia big-eared	Vertebrate	Mammal	FWS Region 5: Northeast	KY, NC, VA, WV	6	Is the species sensitive to changes in chemical concentration (e.g. elevated atmospheric CO2, change in water pH, or dissolved oxygen tolerance)?			Chemistry	No
83	Corynorhinus townsendii virginianus	Bat, Virginia big-eared	Vertebrate	Mammal	FWS Region 5: Northeast	KY, NC, VA, WV	7	Does the species rely on particular triggers for life cycle events (breeding, migration, color change) that are likely to become out of sync with seasonal changes in resource availability or environmental conditions (phenologic mismatch)?			Phenology	No
83	Corynorhinus townsendii virginianus	Bat, Virginia big-eared	Vertebrate	Mammal	FWS Region 5: Northeast	KY, NC, VA, WV	8	Is the species is dependent on one or a few other species (e.g. host, pollinator, dominant food item) and may have limited alternatives if the required species declines due to climate change?			Obligate relationships	No
84	Cottus specus	Sculpin, grotto	Vertebrate	Fish	FWS Region 3: Midwest	MO	1	Does the species have specialized thermal tolerance (e.g. pika, trout) or depend on habitat with an important temperature threshold (e.g. sea ice)?			Temperature	Yes
84	Cottus specus	Sculpin, grotto	Vertebrate	Fish	FWS Region 3: Midwest	MO	2	Is the species dependent on habitat with specialized hydrology pattern (e.g. wetland, vernal pool, seasonal streams; sensitivity to drought)?	"The grotto sculpin is a cave-adapted species that is endemic to karst habitats that provide consistent water flow, high organic input, and connection to surface streams, which allow for seasonal migrations to complete its life cycle."	listing decision: https://www.govinfo.gov/content/pkg/FR-2013-09-25/pdf/2013-23185.pdf	Hydrology	Yes
84	Cottus specus	Sculpin, grotto	Vertebrate	Fish	FWS Region 3: Midwest	MO	3	Is the species or its habitat sensitive to or dependent upon a certain disturbance regime (e.g. old growth forest, fire-adapted system; seasonal floods)?	Sensitive to excessive sedimentation/ erosion	listing decision: https://www.govinfo.gov/content/pkg/FR-2013-09-25/pdf/2013-23185.pdf	Disturbance	Yes
84	Cottus specus	Sculpin, grotto	Vertebrate	Fish	FWS Region 3: Midwest	MO	4	Is the species or its habitat geographically restricted or confined by natural and/or anthropogenic barriers (e.g. mountain range, isolated soil type, coastal zone or island, or hemmed in by urban development)?	Individual fish populations are isolated, but the systems seem to actually be pretty connected and extensive. Listing Decision discusses recolonization following a stochastic event.	listing decision: https://www.govinfo.gov/content/pkg/FR-2013-09-25/pdf/2013-23185.pdf	Isolation	No
84	Cottus specus	Sculpin, grotto	Vertebrate	Fish	FWS Region 3: Midwest	MO	5	Is the species or its habitat threatened by the spread of invasive or “out of balance” species (e.g. weed, forest pest, novel disease)?	Multiple species of fish are considered invasive and predatory on the species.	listing decision: https://www.govinfo.gov/content/pkg/FR-2013-09-25/pdf/2013-23185.pdf	Injurious species	Yes
84	Cottus specus	Sculpin, grotto	Vertebrate	Fish	FWS Region 3: Midwest	MO	6	Is the species sensitive to changes in chemical concentration (e.g. elevated atmospheric CO2, change in water pH, or dissolved oxygen tolerance)?	The listing decision didn't discuss any specific water chemistry or water temperature needs.	listing decision: https://www.govinfo.gov/content/pkg/FR-2013-09-25/pdf/2013-23185.pdf	Chemistry	No
84	Cottus specus	Sculpin, grotto	Vertebrate	Fish	FWS Region 3: Midwest	MO	7	Does the species rely on particular triggers for life cycle events (breeding, migration, color change) that are likely to become out of sync with seasonal changes in resource availability or environmental conditions (phenologic mismatch)?			Phenology	No
84	Cottus specus	Sculpin, grotto	Vertebrate	Fish	FWS Region 3: Midwest	MO	8	Is the species is dependent on one or a few other species (e.g. host, pollinator, dominant food item) and may have limited alternatives if the required species declines due to climate change?			Obligate relationships	No
85	Crenichthys baileyi baileyi	Springfish, White River	Vertebrate	Fish	FWS Region 8: Pacific Southwest	NV	1	Does the species have specialized thermal tolerance (e.g. pika, trout) or depend on habitat with an important temperature threshold (e.g. sea ice)?			Temperature	No
85	Crenichthys baileyi baileyi	Springfish, White River	Vertebrate	Fish	FWS Region 8: Pacific Southwest	NV	2	Is the species dependent on habitat with specialized hydrology pattern (e.g. wetland, vernal pool, seasonal streams; sensitivity to drought)?	Habitat is two aquifer-fed springs which may be adversely affected by increadingly frequent / severe droughts in the SW.	Natureserve	Hydrology	Yes
85	Crenichthys baileyi baileyi	Springfish, White River	Vertebrate	Fish	FWS Region 8: Pacific Southwest	NV	3	Is the species or its habitat sensitive to or dependent upon a certain disturbance regime (e.g. old growth forest, fire-adapted system; seasonal floods)?			Disturbance	No
85	Crenichthys baileyi baileyi	Springfish, White River	Vertebrate	Fish	FWS Region 8: Pacific Southwest	NV	4	Is the species or its habitat geographically restricted or confined by natural and/or anthropogenic barriers (e.g. mountain range, isolated soil type, coastal zone or island, or hemmed in by urban development)?	"Endemic to pluvial White River drainage in Pahranagat Valley, Lincoln County, southeastern Nevada. Presently restricted to Ash Springs (T6S R61E Sec. 6), which is used for public swimming and mainly contains non-native fishes (Matthews and Moseley 1990), in addition to the three endemic fishes."	Natureserve	Isolation	Yes
85	Crenichthys baileyi baileyi	Springfish, White River	Vertebrate	Fish	FWS Region 8: Pacific Southwest	NV	5	Is the species or its habitat threatened by the spread of invasive or “out of balance” species (e.g. weed, forest pest, novel disease)?	Threatened by habitat alteration (such as by cattle) and exotic fishes.	Natureserve	Injurious species	Yes
85	Crenichthys baileyi baileyi	Springfish, White River	Vertebrate	Fish	FWS Region 8: Pacific Southwest	NV	6	Is the species sensitive to changes in chemical concentration (e.g. elevated atmospheric CO2, change in water pH, or dissolved oxygen tolerance)?			Chemistry	No
85	Crenichthys baileyi baileyi	Springfish, White River	Vertebrate	Fish	FWS Region 8: Pacific Southwest	NV	7	Does the species rely on particular triggers for life cycle events (breeding, migration, color change) that are likely to become out of sync with seasonal changes in resource availability or environmental conditions (phenologic mismatch)?			Phenology	No
85	Crenichthys baileyi baileyi	Springfish, White River	Vertebrate	Fish	FWS Region 8: Pacific Southwest	NV	8	Is the species is dependent on one or a few other species (e.g. host, pollinator, dominant food item) and may have limited alternatives if the required species declines due to climate change?			Obligate relationships	No
86	Crenichthys baileyi grandis	Springfish, Hiko White River	Vertebrate	Fish	FWS Region 8: Pacific Southwest	NV	1	Does the species have specialized thermal tolerance (e.g. pika, trout) or depend on habitat with an important temperature threshold (e.g. sea ice)?	"The Blue Link Spring population declined in 1990 when water flow into the reservoir decreased, and the water cooled to unfavorable temperatures."	Natureserve	Temperature	Yes
86	Crenichthys baileyi grandis	Springfish, Hiko White River	Vertebrate	Fish	FWS Region 8: Pacific Southwest	NV	2	Is the species dependent on habitat with specialized hydrology pattern (e.g. wetland, vernal pool, seasonal streams; sensitivity to drought)?	Habitat is two aquifer-fed springs which may be adversely affected by increadingly frequent / severe droughts in the SW.	Natureserve	Hydrology	Yes
86	Crenichthys baileyi grandis	Springfish, Hiko White River	Vertebrate	Fish	FWS Region 8: Pacific Southwest	NV	3	Is the species or its habitat sensitive to or dependent upon a certain disturbance regime (e.g. old growth forest, fire-adapted system; seasonal floods)?			Disturbance	No
86	Crenichthys baileyi grandis	Springfish, Hiko White River	Vertebrate	Fish	FWS Region 8: Pacific Southwest	NV	4	Is the species or its habitat geographically restricted or confined by natural and/or anthropogenic barriers (e.g. mountain range, isolated soil type, coastal zone or island, or hemmed in by urban development)?	"Endemic to Crystal and Hiko springs of pluvial White River drainage in White River system, Pahranagat Valley, Lincoln County, southeastern Nevada. A refugium population exists in Blue Link Spring far outside the native range."	Natureserve	Isolation	Yes
86	Crenichthys baileyi grandis	Springfish, Hiko White River	Vertebrate	Fish	FWS Region 8: Pacific Southwest	NV	5	Is the species or its habitat threatened by the spread of invasive or “out of balance” species (e.g. weed, forest pest, novel disease)?	"The Crystal Spring population has declined to dangerously low levels due to predation and competition with convict cichlids and shortfin mollies."	Natureserve	Injurious species	Yes
86	Crenichthys baileyi grandis	Springfish, Hiko White River	Vertebrate	Fish	FWS Region 8: Pacific Southwest	NV	6	Is the species sensitive to changes in chemical concentration (e.g. elevated atmospheric CO2, change in water pH, or dissolved oxygen tolerance)?			Chemistry	No
86	Crenichthys baileyi grandis	Springfish, Hiko White River	Vertebrate	Fish	FWS Region 8: Pacific Southwest	NV	7	Does the species rely on particular triggers for life cycle events (breeding, migration, color change) that are likely to become out of sync with seasonal changes in resource availability or environmental conditions (phenologic mismatch)?			Phenology	No
86	Crenichthys baileyi grandis	Springfish, Hiko White River	Vertebrate	Fish	FWS Region 8: Pacific Southwest	NV	8	Is the species is dependent on one or a few other species (e.g. host, pollinator, dominant food item) and may have limited alternatives if the required species declines due to climate change?			Obligate relationships	No
87	Cryptobranchus alleganiensis bishopi	Hellbender, Ozark	Vertebrate	Amphibian	FWS Region 3: Midwest	AR, MO	1	Does the species have specialized thermal tolerance (e.g. pika, trout) or depend on habitat with an important temperature threshold (e.g. sea ice)?	"Usually avoids water warmer than 20C."	Natureserve	Temperature	Yes
87	Cryptobranchus alleganiensis bishopi	Hellbender, Ozark	Vertebrate	Amphibian	FWS Region 3: Midwest	AR, MO	2	Is the species dependent on habitat with specialized hydrology pattern (e.g. wetland, vernal pool, seasonal streams; sensitivity to drought)?	"The species depends on cool, flowing, well-oxygenated water, and it needs a coarse (rocky) substrate."	Natureserve	Hydrology	Yes
87	Cryptobranchus alleganiensis bishopi	Hellbender, Ozark	Vertebrate	Amphibian	FWS Region 3: Midwest	AR, MO	3	Is the species or its habitat sensitive to or dependent upon a certain disturbance regime (e.g. old growth forest, fire-adapted system; seasonal floods)?			Disturbance	No
87	Cryptobranchus alleganiensis bishopi	Hellbender, Ozark	Vertebrate	Amphibian	FWS Region 3: Midwest	AR, MO	4	Is the species or its habitat geographically restricted or confined by natural and/or anthropogenic barriers (e.g. mountain range, isolated soil type, coastal zone or island, or hemmed in by urban development)?	Poor disperser. "Fragmentation of populations as a result of habitat loss/degradation is making it increasingly unlikely that extirpated populations can be reestablished through natural dispersal."	Natureserve	Isolation	Yes
87	Cryptobranchus alleganiensis bishopi	Hellbender, Ozark	Vertebrate	Amphibian	FWS Region 3: Midwest	AR, MO	5	Is the species or its habitat threatened by the spread of invasive or “out of balance” species (e.g. weed, forest pest, novel disease)?	"Some recent studies found open sores, tumors, and missing limbs and eyes in hellbenders in the Spring and Eleven Point rivers (see Wheeler et al. 2002, Trauth et al. 2004). The cause of the abnormalities is unknown." NO climate nexus described.	Natureserve	Injurious species	No
87	Cryptobranchus alleganiensis bishopi	Hellbender, Ozark	Vertebrate	Amphibian	FWS Region 3: Midwest	AR, MO	6	Is the species sensitive to changes in chemical concentration (e.g. elevated atmospheric CO2, change in water pH, or dissolved oxygen tolerance)?	Sensitive to changes in dissolved oxygen.	Natureserve	Chemistry	Yes
87	Cryptobranchus alleganiensis bishopi	Hellbender, Ozark	Vertebrate	Amphibian	FWS Region 3: Midwest	AR, MO	7	Does the species rely on particular triggers for life cycle events (breeding, migration, color change) that are likely to become out of sync with seasonal changes in resource availability or environmental conditions (phenologic mismatch)?			Phenology	No
87	Cryptobranchus alleganiensis bishopi	Hellbender, Ozark	Vertebrate	Amphibian	FWS Region 3: Midwest	AR, MO	8	Is the species is dependent on one or a few other species (e.g. host, pollinator, dominant food item) and may have limited alternatives if the required species declines due to climate change?			Obligate relationships	No
88	Crystallaria cincotta	Darter, diamond	Vertebrate	Fish	FWS Region 5: Northeast	WV	1	Does the species have specialized thermal tolerance (e.g. pika, trout) or depend on habitat with an important temperature threshold (e.g. sea ice)?			Temperature	No
88	Crystallaria cincotta	Darter, diamond	Vertebrate	Fish	FWS Region 5: Northeast	WV	2	Is the species dependent on habitat with specialized hydrology pattern (e.g. wetland, vernal pool, seasonal streams; sensitivity to drought)?	Sensitive to stream flow.	listing decision: http://www.gpo.gov/fdsys/pkg/FR-2013-07-26/pdf/2013-17938.pdf	Hydrology	Yes
88	Crystallaria cincotta	Darter, diamond	Vertebrate	Fish	FWS Region 5: Northeast	WV	3	Is the species or its habitat sensitive to or dependent upon a certain disturbance regime (e.g. old growth forest, fire-adapted system; seasonal floods)?	Highly sensitive to sedimentation. Remaining population is in an area where forests and porous soils minimize runoff.	listing decision: http://www.gpo.gov/fdsys/pkg/FR-2013-07-26/pdf/2013-17938.pdf	Disturbance	Yes
88	Crystallaria cincotta	Darter, diamond	Vertebrate	Fish	FWS Region 5: Northeast	WV	4	Is the species or its habitat geographically restricted or confined by natural and/or anthropogenic barriers (e.g. mountain range, isolated soil type, coastal zone or island, or hemmed in by urban development)?	Currently isolated, but "Historical records of the species indicate that the diamond darter was distributed throughout the Ohio River Basin and that the range included the Muskingum River in Ohio; the Ohio River in Ohio, Kentucky, and Indiana;_x000D_ the Green River in Kentucky; and the Cumberland River Drainage in Kentucky and Tennessee."	listing decision: http://www.gpo.gov/fdsys/pkg/FR-2013-07-26/pdf/2013-17938.pdf	Isolation	No
88	Crystallaria cincotta	Darter, diamond	Vertebrate	Fish	FWS Region 5: Northeast	WV	5	Is the species or its habitat threatened by the spread of invasive or “out of balance” species (e.g. weed, forest pest, novel disease)?			Injurious species	No
88	Crystallaria cincotta	Darter, diamond	Vertebrate	Fish	FWS Region 5: Northeast	WV	6	Is the species sensitive to changes in chemical concentration (e.g. elevated atmospheric CO2, change in water pH, or dissolved oxygen tolerance)?			Chemistry	No
88	Crystallaria cincotta	Darter, diamond	Vertebrate	Fish	FWS Region 5: Northeast	WV	7	Does the species rely on particular triggers for life cycle events (breeding, migration, color change) that are likely to become out of sync with seasonal changes in resource availability or environmental conditions (phenologic mismatch)?			Phenology	No
88	Crystallaria cincotta	Darter, diamond	Vertebrate	Fish	FWS Region 5: Northeast	WV	8	Is the species is dependent on one or a few other species (e.g. host, pollinator, dominant food item) and may have limited alternatives if the required species declines due to climate change?			Obligate relationships	No
89	Cumberlandia monodonta	Spectaclecase	Invertebrate	Mollusk	FWS Region 3: Midwest	AL, AR, IL, IA, KS, KY, MN, MO, VA, WV, WI	1	Does the species have specialized thermal tolerance (e.g. pika, trout) or depend on habitat with an important temperature threshold (e.g. sea ice)?	"altered water temperatures is an imminent threat to sheepnose and spectaclecase with moderate to high magnitude, depending the timing of temperature changes and the thermal limits and stage in each species’ development."	listing decision (http://www.gpo.gov/fdsys/pkg/FR-2012-03-13/pdf/2012-5603.pdf)	Temperature	Yes
89	Cumberlandia monodonta	Spectaclecase	Invertebrate	Mollusk	FWS Region 3: Midwest	AL, AR, IL, IA, KS, KY, MN, MO, VA, WV, WI	2	Is the species dependent on habitat with specialized hydrology pattern (e.g. wetland, vernal pool, seasonal streams; sensitivity to drought)?			Hydrology	No
89	Cumberlandia monodonta	Spectaclecase	Invertebrate	Mollusk	FWS Region 3: Midwest	AL, AR, IL, IA, KS, KY, MN, MO, VA, WV, WI	3	Is the species or its habitat sensitive to or dependent upon a certain disturbance regime (e.g. old growth forest, fire-adapted system; seasonal floods)?	Highly sensitive to sedimentation. Remaining population is in an area where forests and porous soils minimize runoff.	listing decision (http://www.gpo.gov/fdsys/pkg/FR-2012-03-13/pdf/2012-5603.pdf)	Disturbance	Yes
89	Cumberlandia monodonta	Spectaclecase	Invertebrate	Mollusk	FWS Region 3: Midwest	AL, AR, IL, IA, KS, KY, MN, MO, VA, WV, WI	4	Is the species or its habitat geographically restricted or confined by natural and/or anthropogenic barriers (e.g. mountain range, isolated soil type, coastal zone or island, or hemmed in by urban development)?	"Many of the extant populations are disjunct, isolated, and appear to be declining." However, it historically occurred across a very large system.	listing decision (http://www.gpo.gov/fdsys/pkg/FR-2012-03-13/pdf/2012-5603.pdf)	Isolation	No
89	Cumberlandia monodonta	Spectaclecase	Invertebrate	Mollusk	FWS Region 3: Midwest	AL, AR, IL, IA, KS, KY, MN, MO, VA, WV, WI	5	Is the species or its habitat threatened by the spread of invasive or “out of balance” species (e.g. weed, forest pest, novel disease)?			Injurious species	No
89	Cumberlandia monodonta	Spectaclecase	Invertebrate	Mollusk	FWS Region 3: Midwest	AL, AR, IL, IA, KS, KY, MN, MO, VA, WV, WI	6	Is the species sensitive to changes in chemical concentration (e.g. elevated atmospheric CO2, change in water pH, or dissolved oxygen tolerance)?	Sensitive to dissolved oxygen concentration	listing decision (http://www.gpo.gov/fdsys/pkg/FR-2012-03-13/pdf/2012-5603.pdf)	Chemistry	Yes
89	Cumberlandia monodonta	Spectaclecase	Invertebrate	Mollusk	FWS Region 3: Midwest	AL, AR, IL, IA, KS, KY, MN, MO, VA, WV, WI	7	Does the species rely on particular triggers for life cycle events (breeding, migration, color change) that are likely to become out of sync with seasonal changes in resource availability or environmental conditions (phenologic mismatch)?			Phenology	No
89	Cumberlandia monodonta	Spectaclecase	Invertebrate	Mollusk	FWS Region 3: Midwest	AL, AR, IL, IA, KS, KY, MN, MO, VA, WV, WI	8	Is the species is dependent on one or a few other species (e.g. host, pollinator, dominant food item) and may have limited alternatives if the required species declines due to climate change?	Glochidial host unknown; probably a limited number of species	listing decision (http://www.gpo.gov/fdsys/pkg/FR-2012-03-13/pdf/2012-5603.pdf)	Obligate relationships	Yes
90	Cyclargus (=Hemiargus) thomasi bethunebakeri	Butterfly, Miami blue	Invertebrate	Arthropod	FWS Region 4: Southeast	FL	1	Does the species have specialized thermal tolerance (e.g. pika, trout) or depend on habitat with an important temperature threshold (e.g. sea ice)?			Temperature	No
90	Cyclargus (=Hemiargus) thomasi bethunebakeri	Butterfly, Miami blue	Invertebrate	Arthropod	FWS Region 4: Southeast	FL	2	Is the species dependent on habitat with specialized hydrology pattern (e.g. wetland, vernal pool, seasonal streams; sensitivity to drought)?	Habitat sensitive to hydrologic (flood or drought) and salinity change.	listing decision (http://www.gpo.gov/fdsys/pkg/FR-2012-04-06/pdf/2012-8088.pdf)	Hydrology	Yes
90	Cyclargus (=Hemiargus) thomasi bethunebakeri	Butterfly, Miami blue	Invertebrate	Arthropod	FWS Region 4: Southeast	FL	3	Is the species or its habitat sensitive to or dependent upon a certain disturbance regime (e.g. old growth forest, fire-adapted system; seasonal floods)?	Disturbance-dependent, early successional habitat. Events like hurricanes are both a threat (killing individuals) and an opportunity (opening patches for early succession habitat)	listing decision (http://www.gpo.gov/fdsys/pkg/FR-2012-04-06/pdf/2012-8088.pdf)	Disturbance	Yes
90	Cyclargus (=Hemiargus) thomasi bethunebakeri	Butterfly, Miami blue	Invertebrate	Arthropod	FWS Region 4: Southeast	FL	4	Is the species or its habitat geographically restricted or confined by natural and/or anthropogenic barriers (e.g. mountain range, isolated soil type, coastal zone or island, or hemmed in by urban development)?	Restricted to a few locations. "Rising sea level is an acute threat to all sites known to currently support the Miami blue (Cannon et al. 2010, p. 852), and it appears that habitat is now being lost (T. Wilmers, pers. comm. 2012a)."	listing decision (http://www.gpo.gov/fdsys/pkg/FR-2012-04-06/pdf/2012-8088.pdf)	Isolation	Yes
90	Cyclargus (=Hemiargus) thomasi bethunebakeri	Butterfly, Miami blue	Invertebrate	Arthropod	FWS Region 4: Southeast	FL	5	Is the species or its habitat threatened by the spread of invasive or “out of balance” species (e.g. weed, forest pest, novel disease)?	Threats include fire ants (predator) and green iguanas (eat host plants).	listing decision (http://www.gpo.gov/fdsys/pkg/FR-2012-04-06/pdf/2012-8088.pdf)	Injurious species	Yes
90	Cyclargus (=Hemiargus) thomasi bethunebakeri	Butterfly, Miami blue	Invertebrate	Arthropod	FWS Region 4: Southeast	FL	6	Is the species sensitive to changes in chemical concentration (e.g. elevated atmospheric CO2, change in water pH, or dissolved oxygen tolerance)?			Chemistry	No
90	Cyclargus (=Hemiargus) thomasi bethunebakeri	Butterfly, Miami blue	Invertebrate	Arthropod	FWS Region 4: Southeast	FL	7	Does the species rely on particular triggers for life cycle events (breeding, migration, color change) that are likely to become out of sync with seasonal changes in resource availability or environmental conditions (phenologic mismatch)?	Phenologically flexible, multiple overlapping broods	listing decision (http://www.gpo.gov/fdsys/pkg/FR-2012-04-06/pdf/2012-8088.pdf)	Phenology	No
90	Cyclargus (=Hemiargus) thomasi bethunebakeri	Butterfly, Miami blue	Invertebrate	Arthropod	FWS Region 4: Southeast	FL	8	Is the species is dependent on one or a few other species (e.g. host, pollinator, dominant food item) and may have limited alternatives if the required species declines due to climate change?	Multiple host plants reported, including weedy species, and multiple genera of ants are also associated	listing decision (http://www.gpo.gov/fdsys/pkg/FR-2012-04-06/pdf/2012-8088.pdf)	Obligate relationships	No
91	Cyprinodon bovinus	Pupfish, Leon Springs	Vertebrate	Fish	FWS Region 2: Southwest	TX	1	Does the species have specialized thermal tolerance (e.g. pika, trout) or depend on habitat with an important temperature threshold (e.g. sea ice)?	Species has narrow environmental range, and temperatures above 84 degrees F may cause decline in fecundity	FWS five-year review (http://ecos.fws.gov/docs/five_year_review/doc4258.pdf)	Temperature	Yes
91	Cyprinodon bovinus	Pupfish, Leon Springs	Vertebrate	Fish	FWS Region 2: Southwest	TX	2	Is the species dependent on habitat with specialized hydrology pattern (e.g. wetland, vernal pool, seasonal streams; sensitivity to drought)?	Habitat is dependent on spring flow and spring is very sensitive to drought and irrigation pumping, water is already declining and climate change is expected to exacerbate this problem in the future. Additionally, changes in flow may alter habitat for breeding and alter connectivity of the system needed to provide access to deeper pools in winter that buffer species from low temperatures, and sha…	FWS five-year review (http://ecos.fws.gov/docs/five_year_review/doc4258.pdf)	Hydrology	Yes
91	Cyprinodon bovinus	Pupfish, Leon Springs	Vertebrate	Fish	FWS Region 2: Southwest	TX	3	Is the species or its habitat sensitive to or dependent upon a certain disturbance regime (e.g. old growth forest, fire-adapted system; seasonal floods)?			Disturbance	No
91	Cyprinodon bovinus	Pupfish, Leon Springs	Vertebrate	Fish	FWS Region 2: Southwest	TX	4	Is the species or its habitat geographically restricted or confined by natural and/or anthropogenic barriers (e.g. mountain range, isolated soil type, coastal zone or island, or hemmed in by urban development)?	"Extremely small range" (<100 square km (less than about 40 square miles), limited to a large extent by changes in water availability. Found really only in 4 mile stretch of habitat.	FWS five-year review (http://ecos.fws.gov/docs/five_year_review/doc4258.pdf)	Isolation	Yes
91	Cyprinodon bovinus	Pupfish, Leon Springs	Vertebrate	Fish	FWS Region 2: Southwest	TX	5	Is the species or its habitat threatened by the spread of invasive or “out of balance” species (e.g. weed, forest pest, novel disease)?			Injurious species	No
91	Cyprinodon bovinus	Pupfish, Leon Springs	Vertebrate	Fish	FWS Region 2: Southwest	TX	6	Is the species sensitive to changes in chemical concentration (e.g. elevated atmospheric CO2, change in water pH, or dissolved oxygen tolerance)?			Chemistry	No
91	Cyprinodon bovinus	Pupfish, Leon Springs	Vertebrate	Fish	FWS Region 2: Southwest	TX	7	Does the species rely on particular triggers for life cycle events (breeding, migration, color change) that are likely to become out of sync with seasonal changes in resource availability or environmental conditions (phenologic mismatch)?			Phenology	No
91	Cyprinodon bovinus	Pupfish, Leon Springs	Vertebrate	Fish	FWS Region 2: Southwest	TX	8	Is the species is dependent on one or a few other species (e.g. host, pollinator, dominant food item) and may have limited alternatives if the required species declines due to climate change?			Obligate relationships	No
92	Cyprinodon diabolis	Pupfish, Devils Hole	Vertebrate	Fish	FWS Region 8: Pacific Southwest	NV	1	Does the species have specialized thermal tolerance (e.g. pika, trout) or depend on habitat with an important temperature threshold (e.g. sea ice)?	Very narrow temperature range for the water in the limestone pool of just over 1 degree C (Water temperature is 32.8 to 33.9 C,)	NatureServe	Temperature	Yes
92	Cyprinodon diabolis	Pupfish, Devils Hole	Vertebrate	Fish	FWS Region 8: Pacific Southwest	NV	2	Is the species dependent on habitat with specialized hydrology pattern (e.g. wetland, vernal pool, seasonal streams; sensitivity to drought)?	Species occurs only in one location in deep limestone pool with certain water levels, DO, and temperature parameters. Species is very susceptible to changes in water levels that could be caused by excessive groundwater withdrawals or drought._x000D_	NatureServe	Hydrology	Yes
92	Cyprinodon diabolis	Pupfish, Devils Hole	Vertebrate	Fish	FWS Region 8: Pacific Southwest	NV	3	Is the species or its habitat sensitive to or dependent upon a certain disturbance regime (e.g. old growth forest, fire-adapted system; seasonal floods)?		NatureServe	Disturbance	No
92	Cyprinodon diabolis	Pupfish, Devils Hole	Vertebrate	Fish	FWS Region 8: Pacific Southwest	NV	4	Is the species or its habitat geographically restricted or confined by natural and/or anthropogenic barriers (e.g. mountain range, isolated soil type, coastal zone or island, or hemmed in by urban development)?	"Wild population occurs only in Devils Hole, Ash Meadows area, Death Valley National Park, Nevada, total wild population has varied over recent decades from a few dozen to a few hundred individuals; highly vulnerable to vandalism and factors that affect water level/quality."	NatureServe	Isolation	Yes
92	Cyprinodon diabolis	Pupfish, Devils Hole	Vertebrate	Fish	FWS Region 8: Pacific Southwest	NV	5	Is the species or its habitat threatened by the spread of invasive or “out of balance” species (e.g. weed, forest pest, novel disease)?	Population is susceptible to human introduction of non-native aquatic species.	NatureServe	Injurious species	Yes
92	Cyprinodon diabolis	Pupfish, Devils Hole	Vertebrate	Fish	FWS Region 8: Pacific Southwest	NV	6	Is the species sensitive to changes in chemical concentration (e.g. elevated atmospheric CO2, change in water pH, or dissolved oxygen tolerance)?	Sspecies has specific DO range within its habitat: "dissolved oxygen 1.8 to 3.3 ppm (Lee et al. 1980)."	NatureServe	Chemistry	Yes
92	Cyprinodon diabolis	Pupfish, Devils Hole	Vertebrate	Fish	FWS Region 8: Pacific Southwest	NV	7	Does the species rely on particular triggers for life cycle events (breeding, migration, color change) that are likely to become out of sync with seasonal changes in resource availability or environmental conditions (phenologic mismatch)?		NatureServe	Phenology	No
92	Cyprinodon diabolis	Pupfish, Devils Hole	Vertebrate	Fish	FWS Region 8: Pacific Southwest	NV	8	Is the species is dependent on one or a few other species (e.g. host, pollinator, dominant food item) and may have limited alternatives if the required species declines due to climate change?			Obligate relationships	No
93	Cyprinodon elegans	Pupfish, Comanche Springs	Vertebrate	Fish	FWS Region 2: Southwest	TX	1	Does the species have specialized thermal tolerance (e.g. pika, trout) or depend on habitat with an important temperature threshold (e.g. sea ice)?			Temperature	No
93	Cyprinodon elegans	Pupfish, Comanche Springs	Vertebrate	Fish	FWS Region 2: Southwest	TX	2	Is the species dependent on habitat with specialized hydrology pattern (e.g. wetland, vernal pool, seasonal streams; sensitivity to drought)?	Major threats include: "habitat loss from declining springflow and reduced surface waters (USFWS 1981). Groundwater pumping for agriculture and human use threatens habitat by lowering water levels and reducing spring flows."	Natureserve	Hydrology	Yes
93	Cyprinodon elegans	Pupfish, Comanche Springs	Vertebrate	Fish	FWS Region 2: Southwest	TX	3	Is the species or its habitat sensitive to or dependent upon a certain disturbance regime (e.g. old growth forest, fire-adapted system; seasonal floods)?			Disturbance	No
93	Cyprinodon elegans	Pupfish, Comanche Springs	Vertebrate	Fish	FWS Region 2: Southwest	TX	4	Is the species or its habitat geographically restricted or confined by natural and/or anthropogenic barriers (e.g. mountain range, isolated soil type, coastal zone or island, or hemmed in by urban development)?	The species is found in "a small series of springs, their outflows, and a system of irrigation canals historically interconnecting Phantom Lake Springs, San Solomon Springs, Giffin Springs, and Toyah Creek near Balmorhea, Reeves County, Texas (Echelle et al. 2003)."	Natureserve	Isolation	Yes
93	Cyprinodon elegans	Pupfish, Comanche Springs	Vertebrate	Fish	FWS Region 2: Southwest	TX	5	Is the species or its habitat threatened by the spread of invasive or “out of balance” species (e.g. weed, forest pest, novel disease)?	Major threats include: "(1) competition with introduced species; (2) degradation of genetic integrity caused by hybridization with introduced Cyprinodon species; and (3) habitat loss from declining springflow and reduced surface waters (USFWS 1981)."	Natureserve	Injurious species	Yes
93	Cyprinodon elegans	Pupfish, Comanche Springs	Vertebrate	Fish	FWS Region 2: Southwest	TX	6	Is the species sensitive to changes in chemical concentration (e.g. elevated atmospheric CO2, change in water pH, or dissolved oxygen tolerance)?			Chemistry	No
93	Cyprinodon elegans	Pupfish, Comanche Springs	Vertebrate	Fish	FWS Region 2: Southwest	TX	7	Does the species rely on particular triggers for life cycle events (breeding, migration, color change) that are likely to become out of sync with seasonal changes in resource availability or environmental conditions (phenologic mismatch)?			Phenology	No
93	Cyprinodon elegans	Pupfish, Comanche Springs	Vertebrate	Fish	FWS Region 2: Southwest	TX	8	Is the species is dependent on one or a few other species (e.g. host, pollinator, dominant food item) and may have limited alternatives if the required species declines due to climate change?			Obligate relationships	No
94	Cyprinodon macularius	Pupfish, desert	Vertebrate	Fish	FWS Region 2: Southwest	AZ, CA	1	Does the species have specialized thermal tolerance (e.g. pika, trout) or depend on habitat with an important temperature threshold (e.g. sea ice)?			Temperature	No
94	Cyprinodon macularius	Pupfish, desert	Vertebrate	Fish	FWS Region 2: Southwest	AZ, CA	2	Is the species dependent on habitat with specialized hydrology pattern (e.g. wetland, vernal pool, seasonal streams; sensitivity to drought)?	Species requires persistent desert water bodies. Increasing severity and duration of droughts in the SW may be problematic.	five-year review (http://ecos.fws.gov/docs/five_year_review/doc3573.pdf)	Hydrology	Yes
94	Cyprinodon macularius	Pupfish, desert	Vertebrate	Fish	FWS Region 2: Southwest	AZ, CA	3	Is the species or its habitat sensitive to or dependent upon a certain disturbance regime (e.g. old growth forest, fire-adapted system; seasonal floods)?			Disturbance	No
94	Cyprinodon macularius	Pupfish, desert	Vertebrate	Fish	FWS Region 2: Southwest	AZ, CA	4	Is the species or its habitat geographically restricted or confined by natural and/or anthropogenic barriers (e.g. mountain range, isolated soil type, coastal zone or island, or hemmed in by urban development)?	"Naturally occurring populations of desert pupfish (Cyprinodon m. macularius or C. macularius) are now restricted in the United States to two streams tributary to, and in shoreline pools and irrigation drains of, the Salton Sea in California (Lau and Boehm 1991)."	five-year review (http://ecos.fws.gov/docs/five_year_review/doc3573.pdf)	Isolation	Yes
94	Cyprinodon macularius	Pupfish, desert	Vertebrate	Fish	FWS Region 2: Southwest	AZ, CA	5	Is the species or its habitat threatened by the spread of invasive or “out of balance” species (e.g. weed, forest pest, novel disease)?	"Populations are drastically reduced due to encroachment by non-native vegetation such as Tamarix (Schoenherr 1988) and perhaps most important, introduction of exotic predators and competitors (especially Tilapia zilli, Oreochromis spp., and mosquitofish)."	Natureserve	Injurious species	Yes
94	Cyprinodon macularius	Pupfish, desert	Vertebrate	Fish	FWS Region 2: Southwest	AZ, CA	6	Is the species sensitive to changes in chemical concentration (e.g. elevated atmospheric CO2, change in water pH, or dissolved oxygen tolerance)?			Chemistry	No
94	Cyprinodon macularius	Pupfish, desert	Vertebrate	Fish	FWS Region 2: Southwest	AZ, CA	7	Does the species rely on particular triggers for life cycle events (breeding, migration, color change) that are likely to become out of sync with seasonal changes in resource availability or environmental conditions (phenologic mismatch)?			Phenology	No
94	Cyprinodon macularius	Pupfish, desert	Vertebrate	Fish	FWS Region 2: Southwest	AZ, CA	8	Is the species is dependent on one or a few other species (e.g. host, pollinator, dominant food item) and may have limited alternatives if the required species declines due to climate change?			Obligate relationships	No
95	Cyprinodon nevadensis mionectes	Pupfish, Ash Meadows Amargosa	Vertebrate	Fish	FWS Region 8: Pacific Southwest	NV	1	Does the species have specialized thermal tolerance (e.g. pika, trout) or depend on habitat with an important temperature threshold (e.g. sea ice)?	"Highly eurythermal" -- tolerate a wide variety of temperatures	FWS five-year review (http://ecos.fws.gov/docs/five_year_review/doc3207.pdf)	Temperature	No
95	Cyprinodon nevadensis mionectes	Pupfish, Ash Meadows Amargosa	Vertebrate	Fish	FWS Region 8: Pacific Southwest	NV	2	Is the species dependent on habitat with specialized hydrology pattern (e.g. wetland, vernal pool, seasonal streams; sensitivity to drought)?	Dependent on spring habitat and sensitive to drought and changes in groundwater levels. Solar development may add to water diversion problems.	NatureServe; FWS five-year review (http://ecos.fws.gov/docs/five_year_review/doc3207.pdf)	Hydrology	Yes
95	Cyprinodon nevadensis mionectes	Pupfish, Ash Meadows Amargosa	Vertebrate	Fish	FWS Region 8: Pacific Southwest	NV	3	Is the species or its habitat sensitive to or dependent upon a certain disturbance regime (e.g. old growth forest, fire-adapted system; seasonal floods)?	Species prefers climax communities. Invasive cattail slow stream flow and lead to more early successional stream communities favored by non-native fish. Also susceptible to fires and floods	FWS five-year review (http://ecos.fws.gov/docs/five_year_review/doc3207.pdf)	Disturbance	Yes
95	Cyprinodon nevadensis mionectes	Pupfish, Ash Meadows Amargosa	Vertebrate	Fish	FWS Region 8: Pacific Southwest	NV	4	Is the species or its habitat geographically restricted or confined by natural and/or anthropogenic barriers (e.g. mountain range, isolated soil type, coastal zone or island, or hemmed in by urban development)?	Restricted to several spring locations in Ash Meadows, east of the Amargosa River, eastern California and western Nevada; elevation 655-700 meters	NatureServe	Isolation	Yes
95	Cyprinodon nevadensis mionectes	Pupfish, Ash Meadows Amargosa	Vertebrate	Fish	FWS Region 8: Pacific Southwest	NV	5	Is the species or its habitat threatened by the spread of invasive or “out of balance” species (e.g. weed, forest pest, novel disease)?	Habitat is susceptible to a number of non-native plant species including tamarisk and yellow star thistle -- both of which are likely favored by CC.	FWS five-year review (http://ecos.fws.gov/docs/five_year_review/doc3207.pdf)	Injurious species	Yes
95	Cyprinodon nevadensis mionectes	Pupfish, Ash Meadows Amargosa	Vertebrate	Fish	FWS Region 8: Pacific Southwest	NV	6	Is the species sensitive to changes in chemical concentration (e.g. elevated atmospheric CO2, change in water pH, or dissolved oxygen tolerance)?	Pupfish are used to alkaline environment and more acidic environment would be detrimental to species. Species may also be sensitive to dissolves oxygen.	FWS five-year review (http://ecos.fws.gov/docs/five_year_review/doc3207.pdf)	Chemistry	Yes
95	Cyprinodon nevadensis mionectes	Pupfish, Ash Meadows Amargosa	Vertebrate	Fish	FWS Region 8: Pacific Southwest	NV	7	Does the species rely on particular triggers for life cycle events (breeding, migration, color change) that are likely to become out of sync with seasonal changes in resource availability or environmental conditions (phenologic mismatch)?			Phenology	No
95	Cyprinodon nevadensis mionectes	Pupfish, Ash Meadows Amargosa	Vertebrate	Fish	FWS Region 8: Pacific Southwest	NV	8	Is the species is dependent on one or a few other species (e.g. host, pollinator, dominant food item) and may have limited alternatives if the required species declines due to climate change?			Obligate relationships	No
96	Cyprinodon nevadensis pectoralis	Pupfish, Warm Springs	Vertebrate	Fish	FWS Region 8: Pacific Southwest	NV	1	Does the species have specialized thermal tolerance (e.g. pika, trout) or depend on habitat with an important temperature threshold (e.g. sea ice)?			Temperature	No
96	Cyprinodon nevadensis pectoralis	Pupfish, Warm Springs	Vertebrate	Fish	FWS Region 8: Pacific Southwest	NV	2	Is the species dependent on habitat with specialized hydrology pattern (e.g. wetland, vernal pool, seasonal streams; sensitivity to drought)?	Occurs in springs and spring outflows which are sensitive to drought and groundwater withdrawals	NatureServe	Hydrology	Yes
96	Cyprinodon nevadensis pectoralis	Pupfish, Warm Springs	Vertebrate	Fish	FWS Region 8: Pacific Southwest	NV	3	Is the species or its habitat sensitive to or dependent upon a certain disturbance regime (e.g. old growth forest, fire-adapted system; seasonal floods)?			Disturbance	No
96	Cyprinodon nevadensis pectoralis	Pupfish, Warm Springs	Vertebrate	Fish	FWS Region 8: Pacific Southwest	NV	4	Is the species or its habitat geographically restricted or confined by natural and/or anthropogenic barriers (e.g. mountain range, isolated soil type, coastal zone or island, or hemmed in by urban development)?	Several occurrences in springs all within a small area	NatureServe	Isolation	Yes
96	Cyprinodon nevadensis pectoralis	Pupfish, Warm Springs	Vertebrate	Fish	FWS Region 8: Pacific Southwest	NV	5	Is the species or its habitat threatened by the spread of invasive or “out of balance” species (e.g. weed, forest pest, novel disease)?	See C.n. mionectes -- no information for this species, but is likely the same as the Ash Meadows Amargosa pupfish	FWS five-year review (http://ecos.fws.gov/docs/five_year_review/doc3207.pdf)	Injurious species	Yes
96	Cyprinodon nevadensis pectoralis	Pupfish, Warm Springs	Vertebrate	Fish	FWS Region 8: Pacific Southwest	NV	6	Is the species sensitive to changes in chemical concentration (e.g. elevated atmospheric CO2, change in water pH, or dissolved oxygen tolerance)?	Pupfish are used to alkaline environment and more acidic environment would be detrimental to species. species may also be sensitive to dissolves oxygen.	FWS five-year review (http://ecos.fws.gov/docs/five_year_review/doc3207.pdf)	Chemistry	Yes
96	Cyprinodon nevadensis pectoralis	Pupfish, Warm Springs	Vertebrate	Fish	FWS Region 8: Pacific Southwest	NV	7	Does the species rely on particular triggers for life cycle events (breeding, migration, color change) that are likely to become out of sync with seasonal changes in resource availability or environmental conditions (phenologic mismatch)?			Phenology	No
96	Cyprinodon nevadensis pectoralis	Pupfish, Warm Springs	Vertebrate	Fish	FWS Region 8: Pacific Southwest	NV	8	Is the species is dependent on one or a few other species (e.g. host, pollinator, dominant food item) and may have limited alternatives if the required species declines due to climate change?			Obligate relationships	No
97	Cyprinodon radiosus	Pupfish, Owens	Vertebrate	Fish	FWS Region 8: Pacific Southwest	CA	1	Does the species have specialized thermal tolerance (e.g. pika, trout) or depend on habitat with an important temperature threshold (e.g. sea ice)?			Temperature	No
97	Cyprinodon radiosus	Pupfish, Owens	Vertebrate	Fish	FWS Region 8: Pacific Southwest	CA	2	Is the species dependent on habitat with specialized hydrology pattern (e.g. wetland, vernal pool, seasonal streams; sensitivity to drought)?	Population decline has been "due to water diversion for agricultural and municipal uses and subsequent habitat alteration (loss of seasonally flooded shallows along the Owens River)." Also threatened by drought.	Natureserve and recovery plan (http://www.fws.gov/ecos/ajax/docs/five_year_review/doc2395.pdf)	Hydrology	Yes
97	Cyprinodon radiosus	Pupfish, Owens	Vertebrate	Fish	FWS Region 8: Pacific Southwest	CA	3	Is the species or its habitat sensitive to or dependent upon a certain disturbance regime (e.g. old growth forest, fire-adapted system; seasonal floods)?			Disturbance	No
97	Cyprinodon radiosus	Pupfish, Owens	Vertebrate	Fish	FWS Region 8: Pacific Southwest	CA	4	Is the species or its habitat geographically restricted or confined by natural and/or anthropogenic barriers (e.g. mountain range, isolated soil type, coastal zone or island, or hemmed in by urban development)?	"Endemic to the Owens Valley, California, from Fish Slough and its springs (Mono County) near Bishop downstream to Owens Lake (Inyo County), including springs around the lake (Moyle 2002)."	Natureserve	Isolation	Yes
97	Cyprinodon radiosus	Pupfish, Owens	Vertebrate	Fish	FWS Region 8: Pacific Southwest	CA	5	Is the species or its habitat threatened by the spread of invasive or “out of balance” species (e.g. weed, forest pest, novel disease)?			Injurious species	No
97	Cyprinodon radiosus	Pupfish, Owens	Vertebrate	Fish	FWS Region 8: Pacific Southwest	CA	6	Is the species sensitive to changes in chemical concentration (e.g. elevated atmospheric CO2, change in water pH, or dissolved oxygen tolerance)?			Chemistry	No
97	Cyprinodon radiosus	Pupfish, Owens	Vertebrate	Fish	FWS Region 8: Pacific Southwest	CA	7	Does the species rely on particular triggers for life cycle events (breeding, migration, color change) that are likely to become out of sync with seasonal changes in resource availability or environmental conditions (phenologic mismatch)?	"Females begin producing eggs when water temperatures are near 14o C, and spawning occurs over soft substrates in spring and summer (Mire 1993). Eggs incubate for approximately 6_x000D_ days before hatching in water temperatures ranging from 24o C to 27o C."	recovery plan (http://ecos.fws.gov/docs/recovery_plan/980930b.pdf)	Phenology	Yes
97	Cyprinodon radiosus	Pupfish, Owens	Vertebrate	Fish	FWS Region 8: Pacific Southwest	CA	8	Is the species is dependent on one or a few other species (e.g. host, pollinator, dominant food item) and may have limited alternatives if the required species declines due to climate change?			Obligate relationships	No
98	Cyprogenia stegaria	Fanshell	Invertebrate	Mollusk	FWS Region 4: Southeast	AL, IL, IN, KY, OH, TN, VA, WV	1	Does the species have specialized thermal tolerance (e.g. pika, trout) or depend on habitat with an important temperature threshold (e.g. sea ice)?	Species is likely sensitive to changes in temperature given its sensitivity to impoundment, etc but there is no specific information on this	species recovery plan (http://ecos.fws.gov/docs/recovery_plan/910709.pdf)	Temperature	No
98	Cyprogenia stegaria	Fanshell	Invertebrate	Mollusk	FWS Region 4: Southeast	AL, IL, IN, KY, OH, TN, VA, WV	2	Is the species dependent on habitat with specialized hydrology pattern (e.g. wetland, vernal pool, seasonal streams; sensitivity to drought)?	Species is sensitive to changes in flow	species recovery plan (http://ecos.fws.gov/docs/recovery_plan/910709.pdf)	Hydrology	Yes
98	Cyprogenia stegaria	Fanshell	Invertebrate	Mollusk	FWS Region 4: Southeast	AL, IL, IN, KY, OH, TN, VA, WV	3	Is the species or its habitat sensitive to or dependent upon a certain disturbance regime (e.g. old growth forest, fire-adapted system; seasonal floods)?			Disturbance	No
98	Cyprogenia stegaria	Fanshell	Invertebrate	Mollusk	FWS Region 4: Southeast	AL, IL, IN, KY, OH, TN, VA, WV	4	Is the species or its habitat geographically restricted or confined by natural and/or anthropogenic barriers (e.g. mountain range, isolated soil type, coastal zone or island, or hemmed in by urban development)?	Species occupies very small portion of its original small range. "This species was historically considered endemic to the eastern highlands east of the Mississippi River. It was historically widely distributed in the Tennessee, Cumberland, and Ohio River systems (Parmalee and Bogan, 1998), although it has become very rare in recent years." Most of the remaining fanshell populations are small and …	NatureServe	Isolation	Yes
98	Cyprogenia stegaria	Fanshell	Invertebrate	Mollusk	FWS Region 4: Southeast	AL, IL, IN, KY, OH, TN, VA, WV	5	Is the species or its habitat threatened by the spread of invasive or “out of balance” species (e.g. weed, forest pest, novel disease)?			Injurious species	No
98	Cyprogenia stegaria	Fanshell	Invertebrate	Mollusk	FWS Region 4: Southeast	AL, IL, IN, KY, OH, TN, VA, WV	6	Is the species sensitive to changes in chemical concentration (e.g. elevated atmospheric CO2, change in water pH, or dissolved oxygen tolerance)?			Chemistry	No
98	Cyprogenia stegaria	Fanshell	Invertebrate	Mollusk	FWS Region 4: Southeast	AL, IL, IN, KY, OH, TN, VA, WV	7	Does the species rely on particular triggers for life cycle events (breeding, migration, color change) that are likely to become out of sync with seasonal changes in resource availability or environmental conditions (phenologic mismatch)?			Phenology	No
98	Cyprogenia stegaria	Fanshell	Invertebrate	Mollusk	FWS Region 4: Southeast	AL, IL, IN, KY, OH, TN, VA, WV	8	Is the species is dependent on one or a few other species (e.g. host, pollinator, dominant food item) and may have limited alternatives if the required species declines due to climate change?	One threat is habitat alterations that "directly affected the species and reduced or eliminated its fish host (USFWS, 1991)"	species recovery plan (http://ecos.fws.gov/docs/recovery_plan/910709.pdf)	Obligate relationships	Yes
99	Delphinapterus leucas	Whale, beluga	Vertebrate	Mammal	NMFS: Marine	AK	1	Does the species have specialized thermal tolerance (e.g. pika, trout) or depend on habitat with an important temperature threshold (e.g. sea ice)?	Sea ice is part of beluga's habitat. Loss of sea ice may result in more frequent ice entrapment, habitat loss from expansion of human activities into formerly un-navigable waters, more predation from killer whales who do best in conditions without ice,	IUCN report (http://cmsdata.iucn.org/downloads/fact_sheet_red_list_beluga.pdf)	Temperature	Yes
99	Delphinapterus leucas	Whale, beluga	Vertebrate	Mammal	NMFS: Marine	AK	2	Is the species dependent on habitat with specialized hydrology pattern (e.g. wetland, vernal pool, seasonal streams; sensitivity to drought)?			Hydrology	No
99	Delphinapterus leucas	Whale, beluga	Vertebrate	Mammal	NMFS: Marine	AK	3	Is the species or its habitat sensitive to or dependent upon a certain disturbance regime (e.g. old growth forest, fire-adapted system; seasonal floods)?			Disturbance	No
99	Delphinapterus leucas	Whale, beluga	Vertebrate	Mammal	NMFS: Marine	AK	4	Is the species or its habitat geographically restricted or confined by natural and/or anthropogenic barriers (e.g. mountain range, isolated soil type, coastal zone or island, or hemmed in by urban development)?	Some populations (such as the Cook Inlet Beluga) are geographically restricted.	Defenders.org	Isolation	No
99	Delphinapterus leucas	Whale, beluga	Vertebrate	Mammal	NMFS: Marine	AK	5	Is the species or its habitat threatened by the spread of invasive or “out of balance” species (e.g. weed, forest pest, novel disease)?	Climate change may also increase disease risk for Belugas.	http://news.nationalgeographic.com/news/2014/02/140214-seals-beluga-whale-arctic-disease-health-science/	Injurious species	Yes
99	Delphinapterus leucas	Whale, beluga	Vertebrate	Mammal	NMFS: Marine	AK	6	Is the species sensitive to changes in chemical concentration (e.g. elevated atmospheric CO2, change in water pH, or dissolved oxygen tolerance)?			Chemistry	No
99	Delphinapterus leucas	Whale, beluga	Vertebrate	Mammal	NMFS: Marine	AK	7	Does the species rely on particular triggers for life cycle events (breeding, migration, color change) that are likely to become out of sync with seasonal changes in resource availability or environmental conditions (phenologic mismatch)?			Phenology	No
99	Delphinapterus leucas	Whale, beluga	Vertebrate	Mammal	NMFS: Marine	AK	8	Is the species is dependent on one or a few other species (e.g. host, pollinator, dominant food item) and may have limited alternatives if the required species declines due to climate change?	Changes in ocean temperatures and ocean currents may result in changes in prey availability and the distance the species needs to travel to reach concentrated prey densities	IUCN report (http://cmsdata.iucn.org/downloads/fact_sheet_red_list_beluga.pdf)	Obligate relationships	Yes
100	Deltistes luxatus	Sucker, Lost River	Vertebrate	Fish	FWS Region 8: Pacific Southwest	CA, OR	1	Does the species have specialized thermal tolerance (e.g. pika, trout) or depend on habitat with an important temperature threshold (e.g. sea ice)?			Temperature	No
100	Deltistes luxatus	Sucker, Lost River	Vertebrate	Fish	FWS Region 8: Pacific Southwest	CA, OR	2	Is the species dependent on habitat with specialized hydrology pattern (e.g. wetland, vernal pool, seasonal streams; sensitivity to drought)?	"Drought is a threat because of its potential to cut off spawning habitat, reduce rearing habitat, and increase disease, parasitism, and predation. However, historically the species has endured periods of prolonged drought and persisted, indicating that drought is not a major threat."	Natureserve	Hydrology	Yes
100	Deltistes luxatus	Sucker, Lost River	Vertebrate	Fish	FWS Region 8: Pacific Southwest	CA, OR	3	Is the species or its habitat sensitive to or dependent upon a certain disturbance regime (e.g. old growth forest, fire-adapted system; seasonal floods)?			Disturbance	No
100	Deltistes luxatus	Sucker, Lost River	Vertebrate	Fish	FWS Region 8: Pacific Southwest	CA, OR	4	Is the species or its habitat geographically restricted or confined by natural and/or anthropogenic barriers (e.g. mountain range, isolated soil type, coastal zone or island, or hemmed in by urban development)?	One major problem has been "loss of spawning habitat due to damming of rivers (e.g., Chiloquin Dam constructed in 1928 on the Sprague River, Oregon, cut off access to 95% of historical spawning habitat for the Upper Klamath Lake population and precluded accumulation of suitable spawning gravels below the dam)."	Natureserve	Isolation	Yes
100	Deltistes luxatus	Sucker, Lost River	Vertebrate	Fish	FWS Region 8: Pacific Southwest	CA, OR	5	Is the species or its habitat threatened by the spread of invasive or “out of balance” species (e.g. weed, forest pest, novel disease)?	"Disease, parasites, and predation/competition by exotic fishes pose some risk, although the degree to which they affect the species is not quantified. Disease and parasites alone may not pose a significant risk, but paired with the impacts of adverse water quality, they can substantially affect sucker survival."	Natureserve	Injurious species	Yes
100	Deltistes luxatus	Sucker, Lost River	Vertebrate	Fish	FWS Region 8: Pacific Southwest	CA, OR	6	Is the species sensitive to changes in chemical concentration (e.g. elevated atmospheric CO2, change in water pH, or dissolved oxygen tolerance)?	"Human-caused increases in nutrient inputs to Upper Klamath Lake have resulted in massive summer and fall blooms of cyanobacteria and elevated lake pH levels of 9.5-10.5, which in turn have led to mass mortalities and curtailed reproduction of the shortnose and Lost River suckers (Falter and Cech 1991; G. Scoppettone, pers. comm., 1995). Fish kills also may result from low dissolved oxygen levels…	Natureserve	Chemistry	Yes
100	Deltistes luxatus	Sucker, Lost River	Vertebrate	Fish	FWS Region 8: Pacific Southwest	CA, OR	7	Does the species rely on particular triggers for life cycle events (breeding, migration, color change) that are likely to become out of sync with seasonal changes in resource availability or environmental conditions (phenologic mismatch)?			Phenology	No
100	Deltistes luxatus	Sucker, Lost River	Vertebrate	Fish	FWS Region 8: Pacific Southwest	CA, OR	8	Is the species is dependent on one or a few other species (e.g. host, pollinator, dominant food item) and may have limited alternatives if the required species declines due to climate change?			Obligate relationships	No
101	Setophaga (fmr. Dendroica) chrysoparia	Warbler, golden-cheeked	Vertebrate	Bird	FWS Region 2: Southwest	TX	1	Does the species have specialized thermal tolerance (e.g. pika, trout) or depend on habitat with an important temperature threshold (e.g. sea ice)?			Temperature	No
101	Setophaga (fmr. Dendroica) chrysoparia	Warbler, golden-cheeked	Vertebrate	Bird	FWS Region 2: Southwest	TX	2	Is the species dependent on habitat with specialized hydrology pattern (e.g. wetland, vernal pool, seasonal streams; sensitivity to drought)?			Hydrology	No
101	Setophaga (fmr. Dendroica) chrysoparia	Warbler, golden-cheeked	Vertebrate	Bird	FWS Region 2: Southwest	TX	3	Is the species or its habitat sensitive to or dependent upon a certain disturbance regime (e.g. old growth forest, fire-adapted system; seasonal floods)?	Requires mature juniper-oak woodlands which are sensitive to fire.	Natureserve	Disturbance	Yes
101	Setophaga (fmr. Dendroica) chrysoparia	Warbler, golden-cheeked	Vertebrate	Bird	FWS Region 2: Southwest	TX	4	Is the species or its habitat geographically restricted or confined by natural and/or anthropogenic barriers (e.g. mountain range, isolated soil type, coastal zone or island, or hemmed in by urban development)?	Breeding range is small and suitable areas are fragmented.	Natureserve	Isolation	Yes
101	Setophaga (fmr. Dendroica) chrysoparia	Warbler, golden-cheeked	Vertebrate	Bird	FWS Region 2: Southwest	TX	5	Is the species or its habitat threatened by the spread of invasive or “out of balance” species (e.g. weed, forest pest, novel disease)?			Injurious species	No
101	Setophaga (fmr. Dendroica) chrysoparia	Warbler, golden-cheeked	Vertebrate	Bird	FWS Region 2: Southwest	TX	6	Is the species sensitive to changes in chemical concentration (e.g. elevated atmospheric CO2, change in water pH, or dissolved oxygen tolerance)?			Chemistry	No
101	Setophaga (fmr. Dendroica) chrysoparia	Warbler, golden-cheeked	Vertebrate	Bird	FWS Region 2: Southwest	TX	7	Does the species rely on particular triggers for life cycle events (breeding, migration, color change) that are likely to become out of sync with seasonal changes in resource availability or environmental conditions (phenologic mismatch)?			Phenology	No
101	Setophaga (fmr. Dendroica) chrysoparia	Warbler, golden-cheeked	Vertebrate	Bird	FWS Region 2: Southwest	TX	8	Is the species is dependent on one or a few other species (e.g. host, pollinator, dominant food item) and may have limited alternatives if the required species declines due to climate change?			Obligate relationships	No
102 (Delisted)	Setophagus (fmr. Dendroica) kirtlandii	Warbler, Kirtland's	Vertebrate	Bird	FWS Region 3: Midwest	FL, MI, SC, WI	1	Does the species have specialized thermal tolerance (e.g. pika, trout) or depend on habitat with an important temperature threshold (e.g. sea ice)?	"Heat tolerance is the primary factor expected to limit growth of jack pine (Botkin et al. 1991)."	FWS five year review (http://ecos.fws.gov/docs/five_year_review/doc4045.pdf)	Temperature	Yes
102 (Delisted)	Setophagus (fmr. Dendroica) kirtlandii	Warbler, Kirtland's	Vertebrate	Bird	FWS Region 3: Midwest	FL, MI, SC, WI	2	Is the species dependent on habitat with specialized hydrology pattern (e.g. wetland, vernal pool, seasonal streams; sensitivity to drought)?			Hydrology	No
102 (Delisted)	Setophagus (fmr. Dendroica) kirtlandii	Warbler, Kirtland's	Vertebrate	Bird	FWS Region 3: Midwest	FL, MI, SC, WI	3	Is the species or its habitat sensitive to or dependent upon a certain disturbance regime (e.g. old growth forest, fire-adapted system; seasonal floods)?	The Kirtland’s warbler is often referred to as the “bird of fire” because of its strict reliance on the fire-dependent jack pine forest for nesting.	FWS five year review (http://ecos.fws.gov/docs/five_year_review/doc4045.pdf)	Disturbance	Yes
102 (Delisted)	Setophagus (fmr. Dendroica) kirtlandii	Warbler, Kirtland's	Vertebrate	Bird	FWS Region 3: Midwest	FL, MI, SC, WI	4	Is the species or its habitat geographically restricted or confined by natural and/or anthropogenic barriers (e.g. mountain range, isolated soil type, coastal zone or island, or hemmed in by urban development)?	Very small breeding range, though the species seems to be expanding its breeding range northward. However, wintering habitat is on small, low-lying islands	FWS five year review (http://ecos.fws.gov/docs/five_year_review/doc4045.pdf)	Isolation	Yes
102 (Delisted)	Setophagus (fmr. Dendroica) kirtlandii	Warbler, Kirtland's	Vertebrate	Bird	FWS Region 3: Midwest	FL, MI, SC, WI	5	Is the species or its habitat threatened by the spread of invasive or “out of balance” species (e.g. weed, forest pest, novel disease)?	Brood parasitism by cowbirds, but that doesn't seem to have a climate nexus.	FWS five year review (http://ecos.fws.gov/docs/five_year_review/doc4045.pdf)	Injurious species	No
102 (Delisted)	Setophagus (fmr. Dendroica) kirtlandii	Warbler, Kirtland's	Vertebrate	Bird	FWS Region 3: Midwest	FL, MI, SC, WI	6	Is the species sensitive to changes in chemical concentration (e.g. elevated atmospheric CO2, change in water pH, or dissolved oxygen tolerance)?			Chemistry	No
102 (Delisted)	Setophagus (fmr. Dendroica) kirtlandii	Warbler, Kirtland's	Vertebrate	Bird	FWS Region 3: Midwest	FL, MI, SC, WI	7	Does the species rely on particular triggers for life cycle events (breeding, migration, color change) that are likely to become out of sync with seasonal changes in resource availability or environmental conditions (phenologic mismatch)?			Phenology	No
102 (Delisted)	Setophagus (fmr. Dendroica) kirtlandii	Warbler, Kirtland's	Vertebrate	Bird	FWS Region 3: Midwest	FL, MI, SC, WI	8	Is the species is dependent on one or a few other species (e.g. host, pollinator, dominant food item) and may have limited alternatives if the required species declines due to climate change?	Jack pine dependence covered under habitat/disturbance. Broadly insectivorous; eat fruit in wintering grounds.	FWS five year review (http://ecos.fws.gov/docs/five_year_review/doc4045.pdf)	Obligate relationships	No
103	Dermochelys coriacea	Sea turtle, leatherback	Vertebrate	Reptile	FWS Region 4: Southeast	AL, AK, CA, CT, DE, FL, GA, HI, LA, ME, MD, MA, MS, NH, NJ, NY, NC, OR, PR, RI, SC, TX, VA, VI, WA	1	Does the species have specialized thermal tolerance (e.g. pika, trout) or depend on habitat with an important temperature threshold (e.g. sea ice)?	Hatchlings may be sensitive to high beach temperatures and sex ratio may be affected by temperature: "Because leatherback turtles exhibit temperature-dependent sex determination (reviewed by Wibbels 2003), there may be a skewing _x000D_ of future leatherback cohorts toward a strong female bias since warmer temperatures produce more female embryos."	Five-Year Review: https://ecos.fws.gov/docs/five_year_review/doc4313.pdf	Temperature	Yes
103	Dermochelys coriacea	Sea turtle, leatherback	Vertebrate	Reptile	FWS Region 4: Southeast	AL, AK, CA, CT, DE, FL, GA, HI, LA, ME, MD, MA, MS, NH, NJ, NY, NC, OR, PR, RI, SC, TX, VA, VI, WA	2	Is the species dependent on habitat with specialized hydrology pattern (e.g. wetland, vernal pool, seasonal streams; sensitivity to drought)?	Moisture on beach may also be important to hatching success	Five-Year Review: https://ecos.fws.gov/docs/five_year_review/doc4313.pdf	Hydrology	Yes
103	Dermochelys coriacea	Sea turtle, leatherback	Vertebrate	Reptile	FWS Region 4: Southeast	AL, AK, CA, CT, DE, FL, GA, HI, LA, ME, MD, MA, MS, NH, NJ, NY, NC, OR, PR, RI, SC, TX, VA, VI, WA	3	Is the species or its habitat sensitive to or dependent upon a certain disturbance regime (e.g. old growth forest, fire-adapted system; seasonal floods)?	Change in the frequency or timing of coastal storms could also speed loss of beach habitat due to increased coastal erosion. Species is sensitive to major catastrophic storm events that cause significant mortality.	Five-Year Review: https://ecos.fws.gov/docs/five_year_review/doc4313.pdf	Disturbance	Yes
103	Dermochelys coriacea	Sea turtle, leatherback	Vertebrate	Reptile	FWS Region 4: Southeast	AL, AK, CA, CT, DE, FL, GA, HI, LA, ME, MD, MA, MS, NH, NJ, NY, NC, OR, PR, RI, SC, TX, VA, VI, WA	4	Is the species or its habitat geographically restricted or confined by natural and/or anthropogenic barriers (e.g. mountain range, isolated soil type, coastal zone or island, or hemmed in by urban development)?	Nesting habitat geographically restricted (beaches). Sea level rise may result both directly and indirectly in loss of beach nesting habitat for the species. Sand may not be of sufficient depth and beaches may be lost as the sea level rises. Also more shoreline armoring may occur as a human response to sea level rise	Five-Year Review: https://ecos.fws.gov/docs/five_year_review/doc4313.pdf	Isolation	Yes
103	Dermochelys coriacea	Sea turtle, leatherback	Vertebrate	Reptile	FWS Region 4: Southeast	AL, AK, CA, CT, DE, FL, GA, HI, LA, ME, MD, MA, MS, NH, NJ, NY, NC, OR, PR, RI, SC, TX, VA, VI, WA	5	Is the species or its habitat threatened by the spread of invasive or “out of balance” species (e.g. weed, forest pest, novel disease)?			Injurious species	No
103	Dermochelys coriacea	Sea turtle, leatherback	Vertebrate	Reptile	FWS Region 4: Southeast	AL, AK, CA, CT, DE, FL, GA, HI, LA, ME, MD, MA, MS, NH, NJ, NY, NC, OR, PR, RI, SC, TX, VA, VI, WA	6	Is the species sensitive to changes in chemical concentration (e.g. elevated atmospheric CO2, change in water pH, or dissolved oxygen tolerance)?	"At sea, hatchling dispersal, adult migration, and prey availability may be affected by changes in surface current and thermohaline circulation patterns."	Five-Year Review: https://ecos.fws.gov/docs/five_year_review/doc4313.pdf	Chemistry	Yes
103	Dermochelys coriacea	Sea turtle, leatherback	Vertebrate	Reptile	FWS Region 4: Southeast	AL, AK, CA, CT, DE, FL, GA, HI, LA, ME, MD, MA, MS, NH, NJ, NY, NC, OR, PR, RI, SC, TX, VA, VI, WA	7	Does the species rely on particular triggers for life cycle events (breeding, migration, color change) that are likely to become out of sync with seasonal changes in resource availability or environmental conditions (phenologic mismatch)?			Phenology	No
103	Dermochelys coriacea	Sea turtle, leatherback	Vertebrate	Reptile	FWS Region 4: Southeast	AL, AK, CA, CT, DE, FL, GA, HI, LA, ME, MD, MA, MS, NH, NJ, NY, NC, OR, PR, RI, SC, TX, VA, VI, WA	8	Is the species is dependent on one or a few other species (e.g. host, pollinator, dominant food item) and may have limited alternatives if the required species declines due to climate change?	Feed almost exclusively on jellyfish	Five-Year Review: https://ecos.fws.gov/docs/five_year_review/doc4313.pdf	Obligate relationships	Yes
104	Dinacoma caseyi	June-beetle, Casey's	Invertebrate	Arthropod	FWS Region 8: Pacific Southwest	CA	1	Does the species have specialized thermal tolerance (e.g. pika, trout) or depend on habitat with an important temperature threshold (e.g. sea ice)?			Temperature	No
104	Dinacoma caseyi	June-beetle, Casey's	Invertebrate	Arthropod	FWS Region 8: Pacific Southwest	CA	2	Is the species dependent on habitat with specialized hydrology pattern (e.g. wetland, vernal pool, seasonal streams; sensitivity to drought)?	"Casey’s June beetle is sensitive to changes in climate factors, such as increased windspeed and temperatures (that dry alluvial soils and disperse female pheromones)."	listing decision (http://www.gpo.gov/fdsys/pkg/FR-2011-09-22/pdf/2011-24047.pdf)	Hydrology	Yes
104	Dinacoma caseyi	June-beetle, Casey's	Invertebrate	Arthropod	FWS Region 8: Pacific Southwest	CA	3	Is the species or its habitat sensitive to or dependent upon a certain disturbance regime (e.g. old growth forest, fire-adapted system; seasonal floods)?	Sensitive to flood scouring	listing decision (http://www.gpo.gov/fdsys/pkg/FR-2011-09-22/pdf/2011-24047.pdf)	Disturbance	Yes
104	Dinacoma caseyi	June-beetle, Casey's	Invertebrate	Arthropod	FWS Region 8: Pacific Southwest	CA	4	Is the species or its habitat geographically restricted or confined by natural and/or anthropogenic barriers (e.g. mountain range, isolated soil type, coastal zone or island, or hemmed in by urban development)?	This species is a narrow endemic, known to occur only in the Coachella Valley where it meets the boundary of the San Jacinto Mountains in an area of approximately 600 acres	Natureserve	Isolation	Yes
104	Dinacoma caseyi	June-beetle, Casey's	Invertebrate	Arthropod	FWS Region 8: Pacific Southwest	CA	5	Is the species or its habitat threatened by the spread of invasive or “out of balance” species (e.g. weed, forest pest, novel disease)?			Injurious species	No
104	Dinacoma caseyi	June-beetle, Casey's	Invertebrate	Arthropod	FWS Region 8: Pacific Southwest	CA	6	Is the species sensitive to changes in chemical concentration (e.g. elevated atmospheric CO2, change in water pH, or dissolved oxygen tolerance)?			Chemistry	No
104	Dinacoma caseyi	June-beetle, Casey's	Invertebrate	Arthropod	FWS Region 8: Pacific Southwest	CA	7	Does the species rely on particular triggers for life cycle events (breeding, migration, color change) that are likely to become out of sync with seasonal changes in resource availability or environmental conditions (phenologic mismatch)?	Female reproductive pheromomes are wind dispersed; sensitive to change in wind speed during reproductive season	listing decision (http://www.gpo.gov/fdsys/pkg/FR-2011-09-22/pdf/2011-24047.pdf)	Phenology	Yes
104	Dinacoma caseyi	June-beetle, Casey's	Invertebrate	Arthropod	FWS Region 8: Pacific Southwest	CA	8	Is the species is dependent on one or a few other species (e.g. host, pollinator, dominant food item) and may have limited alternatives if the required species declines due to climate change?	It seems to be a habitat/soil type specialist but not a feeding plant specialist	listing decision (http://www.gpo.gov/fdsys/pkg/FR-2011-09-22/pdf/2011-24047.pdf)	Obligate relationships	No
105	Dipodomys heermanni morroensis	Kangaroo rat, Morro Bay	Vertebrate	Mammal	FWS Region 8: Pacific Southwest	CA	1	Does the species have specialized thermal tolerance (e.g. pika, trout) or depend on habitat with an important temperature threshold (e.g. sea ice)?			Temperature	No
105	Dipodomys heermanni morroensis	Kangaroo rat, Morro Bay	Vertebrate	Mammal	FWS Region 8: Pacific Southwest	CA	2	Is the species dependent on habitat with specialized hydrology pattern (e.g. wetland, vernal pool, seasonal streams; sensitivity to drought)?			Hydrology	No
105	Dipodomys heermanni morroensis	Kangaroo rat, Morro Bay	Vertebrate	Mammal	FWS Region 8: Pacific Southwest	CA	3	Is the species or its habitat sensitive to or dependent upon a certain disturbance regime (e.g. old growth forest, fire-adapted system; seasonal floods)?	"Endangered because of due to human encroachment on habitat and lack of natural disturbance by fire (e.g., results in unsuitable vegetation density)."	Natureserve	Disturbance	Yes
105	Dipodomys heermanni morroensis	Kangaroo rat, Morro Bay	Vertebrate	Mammal	FWS Region 8: Pacific Southwest	CA	4	Is the species or its habitat geographically restricted or confined by natural and/or anthropogenic barriers (e.g. mountain range, isolated soil type, coastal zone or island, or hemmed in by urban development)?	Current range estimates are 37 acres on private land near Morro Bay, San Luis Obispo County, California.	recovery plan (http://ecos.fws.gov/docs/recovery_plan/000125.pdf)	Isolation	Yes
105	Dipodomys heermanni morroensis	Kangaroo rat, Morro Bay	Vertebrate	Mammal	FWS Region 8: Pacific Southwest	CA	5	Is the species or its habitat threatened by the spread of invasive or “out of balance” species (e.g. weed, forest pest, novel disease)?			Injurious species	No
105	Dipodomys heermanni morroensis	Kangaroo rat, Morro Bay	Vertebrate	Mammal	FWS Region 8: Pacific Southwest	CA	6	Is the species sensitive to changes in chemical concentration (e.g. elevated atmospheric CO2, change in water pH, or dissolved oxygen tolerance)?			Chemistry	No
105	Dipodomys heermanni morroensis	Kangaroo rat, Morro Bay	Vertebrate	Mammal	FWS Region 8: Pacific Southwest	CA	7	Does the species rely on particular triggers for life cycle events (breeding, migration, color change) that are likely to become out of sync with seasonal changes in resource availability or environmental conditions (phenologic mismatch)?	"Breeding appears to begin simultaneously with plant growth in spring."	Natureserve	Phenology	Yes
105	Dipodomys heermanni morroensis	Kangaroo rat, Morro Bay	Vertebrate	Mammal	FWS Region 8: Pacific Southwest	CA	8	Is the species is dependent on one or a few other species (e.g. host, pollinator, dominant food item) and may have limited alternatives if the required species declines due to climate change?			Obligate relationships	No
106	Dipodomys ingens	Kangaroo rat, giant	Vertebrate	Mammal	FWS Region 8: Pacific Southwest	CA	1	Does the species have specialized thermal tolerance (e.g. pika, trout) or depend on habitat with an important temperature threshold (e.g. sea ice)?			Temperature	No
106	Dipodomys ingens	Kangaroo rat, giant	Vertebrate	Mammal	FWS Region 8: Pacific Southwest	CA	2	Is the species dependent on habitat with specialized hydrology pattern (e.g. wetland, vernal pool, seasonal streams; sensitivity to drought)?	"Changes in annual rainfall totals (Single et al. 1996) are the major natural ecosystem process occurring in giant kangaroo rat habitat. … changes in weather patterns were linked to expansion and declines in giant kangaroo rat populations (USFWS 1998)."	Five year review: https://ecos.fws.gov/docs/five_year_review/doc3215.pdf	Hydrology	Yes
106	Dipodomys ingens	Kangaroo rat, giant	Vertebrate	Mammal	FWS Region 8: Pacific Southwest	CA	3	Is the species or its habitat sensitive to or dependent upon a certain disturbance regime (e.g. old growth forest, fire-adapted system; seasonal floods)?	"Habitat degradation due to lack of appropriate habitat management on conservation lands, especially lack of grazing or fire to control density of vegetation (including shrubs) may be a threat (Williams and Germano 1993)."	Natureserve and five-year review: https://ecos.fws.gov/docs/five_year_review/doc3215.pdf	Disturbance	Yes
106	Dipodomys ingens	Kangaroo rat, giant	Vertebrate	Mammal	FWS Region 8: Pacific Southwest	CA	4	Is the species or its habitat geographically restricted or confined by natural and/or anthropogenic barriers (e.g. mountain range, isolated soil type, coastal zone or island, or hemmed in by urban development)?	"The population is currently fragmented into six major geographic units (all within S. California) which are fragmented into more than 100 smaller populations, many of which are isolated by several miles of barriers such as steep terrain with plant communities unsuitable as habitat, or agricultural, industrial, or urban land without habitat for this species (USFWS 1998)."	Natureserve	Isolation	Yes
106	Dipodomys ingens	Kangaroo rat, giant	Vertebrate	Mammal	FWS Region 8: Pacific Southwest	CA	5	Is the species or its habitat threatened by the spread of invasive or “out of balance” species (e.g. weed, forest pest, novel disease)?	Disease is also a growing conern.	Five year review: https://ecos.fws.gov/docs/five_year_review/doc3215.pdf	Injurious species	Yes
106	Dipodomys ingens	Kangaroo rat, giant	Vertebrate	Mammal	FWS Region 8: Pacific Southwest	CA	6	Is the species sensitive to changes in chemical concentration (e.g. elevated atmospheric CO2, change in water pH, or dissolved oxygen tolerance)?			Chemistry	No
106	Dipodomys ingens	Kangaroo rat, giant	Vertebrate	Mammal	FWS Region 8: Pacific Southwest	CA	7	Does the species rely on particular triggers for life cycle events (breeding, migration, color change) that are likely to become out of sync with seasonal changes in resource availability or environmental conditions (phenologic mismatch)?			Phenology	No
106	Dipodomys ingens	Kangaroo rat, giant	Vertebrate	Mammal	FWS Region 8: Pacific Southwest	CA	8	Is the species is dependent on one or a few other species (e.g. host, pollinator, dominant food item) and may have limited alternatives if the required species declines due to climate change?			Obligate relationships	No
107	Dipodomys merriami parvus	Kangaroo rat, San Bernardino Merriam's	Vertebrate	Mammal	FWS Region 8: Pacific Southwest	CA	1	Does the species have specialized thermal tolerance (e.g. pika, trout) or depend on habitat with an important temperature threshold (e.g. sea ice)?			Temperature	No
107	Dipodomys merriami parvus	Kangaroo rat, San Bernardino Merriam's	Vertebrate	Mammal	FWS Region 8: Pacific Southwest	CA	2	Is the species dependent on habitat with specialized hydrology pattern (e.g. wetland, vernal pool, seasonal streams; sensitivity to drought)?			Hydrology	No
107	Dipodomys merriami parvus	Kangaroo rat, San Bernardino Merriam's	Vertebrate	Mammal	FWS Region 8: Pacific Southwest	CA	3	Is the species or its habitat sensitive to or dependent upon a certain disturbance regime (e.g. old growth forest, fire-adapted system; seasonal floods)?	"All SBKR remaining populations are threatened by seasonal flood events due to current restriction to active flood plain habitats."	http://www.cdpr.ca.gov/docs/endspec/espdfs/sbkrbio.pdf	Disturbance	Yes
107	Dipodomys merriami parvus	Kangaroo rat, San Bernardino Merriam's	Vertebrate	Mammal	FWS Region 8: Pacific Southwest	CA	4	Is the species or its habitat geographically restricted or confined by natural and/or anthropogenic barriers (e.g. mountain range, isolated soil type, coastal zone or island, or hemmed in by urban development)?			Isolation	No
107	Dipodomys merriami parvus	Kangaroo rat, San Bernardino Merriam's	Vertebrate	Mammal	FWS Region 8: Pacific Southwest	CA	5	Is the species or its habitat threatened by the spread of invasive or “out of balance” species (e.g. weed, forest pest, novel disease)?			Injurious species	No
107	Dipodomys merriami parvus	Kangaroo rat, San Bernardino Merriam's	Vertebrate	Mammal	FWS Region 8: Pacific Southwest	CA	6	Is the species sensitive to changes in chemical concentration (e.g. elevated atmospheric CO2, change in water pH, or dissolved oxygen tolerance)?			Chemistry	No
107	Dipodomys merriami parvus	Kangaroo rat, San Bernardino Merriam's	Vertebrate	Mammal	FWS Region 8: Pacific Southwest	CA	7	Does the species rely on particular triggers for life cycle events (breeding, migration, color change) that are likely to become out of sync with seasonal changes in resource availability or environmental conditions (phenologic mismatch)?			Phenology	No
107	Dipodomys merriami parvus	Kangaroo rat, San Bernardino Merriam's	Vertebrate	Mammal	FWS Region 8: Pacific Southwest	CA	8	Is the species is dependent on one or a few other species (e.g. host, pollinator, dominant food item) and may have limited alternatives if the required species declines due to climate change?			Obligate relationships	No
108	Dipodomys nitratoides exilis	Kangaroo rat, Fresno	Vertebrate	Mammal	FWS Region 8: Pacific Southwest	CA	1	Does the species have specialized thermal tolerance (e.g. pika, trout) or depend on habitat with an important temperature threshold (e.g. sea ice)?			Temperature	No
108	Dipodomys nitratoides exilis	Kangaroo rat, Fresno	Vertebrate	Mammal	FWS Region 8: Pacific Southwest	CA	2	Is the species dependent on habitat with specialized hydrology pattern (e.g. wetland, vernal pool, seasonal streams; sensitivity to drought)?			Hydrology	No
108	Dipodomys nitratoides exilis	Kangaroo rat, Fresno	Vertebrate	Mammal	FWS Region 8: Pacific Southwest	CA	3	Is the species or its habitat sensitive to or dependent upon a certain disturbance regime (e.g. old growth forest, fire-adapted system; seasonal floods)?	Adapted to historic fire regime, maintaining early-seral chaparral habitat	Natureserve	Disturbance	Yes
108	Dipodomys nitratoides exilis	Kangaroo rat, Fresno	Vertebrate	Mammal	FWS Region 8: Pacific Southwest	CA	4	Is the species or its habitat geographically restricted or confined by natural and/or anthropogenic barriers (e.g. mountain range, isolated soil type, coastal zone or island, or hemmed in by urban development)?	Restricted habitat and narrow range in southern California; vulnerable to habitat loss from residential and agricultural development	Natureserve	Isolation	Yes
108	Dipodomys nitratoides exilis	Kangaroo rat, Fresno	Vertebrate	Mammal	FWS Region 8: Pacific Southwest	CA	5	Is the species or its habitat threatened by the spread of invasive or “out of balance” species (e.g. weed, forest pest, novel disease)?			Injurious species	No
108	Dipodomys nitratoides exilis	Kangaroo rat, Fresno	Vertebrate	Mammal	FWS Region 8: Pacific Southwest	CA	6	Is the species sensitive to changes in chemical concentration (e.g. elevated atmospheric CO2, change in water pH, or dissolved oxygen tolerance)?			Chemistry	No
108	Dipodomys nitratoides exilis	Kangaroo rat, Fresno	Vertebrate	Mammal	FWS Region 8: Pacific Southwest	CA	7	Does the species rely on particular triggers for life cycle events (breeding, migration, color change) that are likely to become out of sync with seasonal changes in resource availability or environmental conditions (phenologic mismatch)?			Phenology	No
108	Dipodomys nitratoides exilis	Kangaroo rat, Fresno	Vertebrate	Mammal	FWS Region 8: Pacific Southwest	CA	8	Is the species is dependent on one or a few other species (e.g. host, pollinator, dominant food item) and may have limited alternatives if the required species declines due to climate change?			Obligate relationships	No
109	Dipodomys nitratoides nitratoides	Kangaroo rat, Tipton	Vertebrate	Mammal	FWS Region 8: Pacific Southwest	CA	1	Does the species have specialized thermal tolerance (e.g. pika, trout) or depend on habitat with an important temperature threshold (e.g. sea ice)?			Temperature	No
109	Dipodomys nitratoides nitratoides	Kangaroo rat, Tipton	Vertebrate	Mammal	FWS Region 8: Pacific Southwest	CA	2	Is the species dependent on habitat with specialized hydrology pattern (e.g. wetland, vernal pool, seasonal streams; sensitivity to drought)?			Hydrology	No
109	Dipodomys nitratoides nitratoides	Kangaroo rat, Tipton	Vertebrate	Mammal	FWS Region 8: Pacific Southwest	CA	3	Is the species or its habitat sensitive to or dependent upon a certain disturbance regime (e.g. old growth forest, fire-adapted system; seasonal floods)?	"Current threats of destruction and degradation of the habitat of subspecies nitratoides come … secondarily from flooding (USFWS 1998)."	Natureserve	Disturbance	Yes
109	Dipodomys nitratoides nitratoides	Kangaroo rat, Tipton	Vertebrate	Mammal	FWS Region 8: Pacific Southwest	CA	4	Is the species or its habitat geographically restricted or confined by natural and/or anthropogenic barriers (e.g. mountain range, isolated soil type, coastal zone or island, or hemmed in by urban development)?			Isolation	No
109	Dipodomys nitratoides nitratoides	Kangaroo rat, Tipton	Vertebrate	Mammal	FWS Region 8: Pacific Southwest	CA	5	Is the species or its habitat threatened by the spread of invasive or “out of balance” species (e.g. weed, forest pest, novel disease)?	"Habitat has been reduced and fragmented primarily as a result of agricultural development, with additional losses due to urbanization, associated transportation infrastructure, and invasion by exotic grasses (USFWS 1998)." Disease mentioned as well.	Natureserve	Injurious species	Yes
109	Dipodomys nitratoides nitratoides	Kangaroo rat, Tipton	Vertebrate	Mammal	FWS Region 8: Pacific Southwest	CA	6	Is the species sensitive to changes in chemical concentration (e.g. elevated atmospheric CO2, change in water pH, or dissolved oxygen tolerance)?			Chemistry	No
109	Dipodomys nitratoides nitratoides	Kangaroo rat, Tipton	Vertebrate	Mammal	FWS Region 8: Pacific Southwest	CA	7	Does the species rely on particular triggers for life cycle events (breeding, migration, color change) that are likely to become out of sync with seasonal changes in resource availability or environmental conditions (phenologic mismatch)?			Phenology	No
109	Dipodomys nitratoides nitratoides	Kangaroo rat, Tipton	Vertebrate	Mammal	FWS Region 8: Pacific Southwest	CA	8	Is the species is dependent on one or a few other species (e.g. host, pollinator, dominant food item) and may have limited alternatives if the required species declines due to climate change?			Obligate relationships	No
110 (Downlisted)	Dipodomys stephensi	Kangaroo rat, Stephens'	Vertebrate	Mammal	FWS Region 8: Pacific Southwest	CA	1	Does the species have specialized thermal tolerance (e.g. pika, trout) or depend on habitat with an important temperature threshold (e.g. sea ice)?			Temperature	No	Downlisted in 2022
110 (Downlisted)	Dipodomys stephensi	Kangaroo rat, Stephens'	Vertebrate	Mammal	FWS Region 8: Pacific Southwest	CA	2	Is the species dependent on habitat with specialized hydrology pattern (e.g. wetland, vernal pool, seasonal streams; sensitivity to drought)?			Hydrology	No	Downlisted in 2022
110 (Downlisted)	Dipodomys stephensi	Kangaroo rat, Stephens'	Vertebrate	Mammal	FWS Region 8: Pacific Southwest	CA	3	Is the species or its habitat sensitive to or dependent upon a certain disturbance regime (e.g. old growth forest, fire-adapted system; seasonal floods)?		recovery plan (http://ecos.fws.gov/docs/recovery_plan/970623.pdf)	Disturbance	No	Downlisted in 2022
110 (Downlisted)	Dipodomys stephensi	Kangaroo rat, Stephens'	Vertebrate	Mammal	FWS Region 8: Pacific Southwest	CA	4	Is the species or its habitat geographically restricted or confined by natural and/or anthropogenic barriers (e.g. mountain range, isolated soil type, coastal zone or island, or hemmed in by urban development)?	"The range encompasses approximately 2,870 square kilometers in the San Jacinto Valley and adjacent areas." Restricted by urban/ag development. Low population numbers and isolated subpopulations.	Natureserve; recovery plan (http://ecos.fws.gov/docs/recovery_plan/970623.pdf)_x000D_	Isolation	Yes	Downlisted in 2022
110 (Downlisted)	Dipodomys stephensi	Kangaroo rat, Stephens'	Vertebrate	Mammal	FWS Region 8: Pacific Southwest	CA	5	Is the species or its habitat threatened by the spread of invasive or “out of balance” species (e.g. weed, forest pest, novel disease)?	"Certain non-native grasses (e.g., Bromus diandrus) can exclude this species from otherwise suitable habitat (USFWS 1997)." Disease a threat as well.	Natureserve	Injurious species	Yes	Downlisted in 2022
110 (Downlisted)	Dipodomys stephensi	Kangaroo rat, Stephens'	Vertebrate	Mammal	FWS Region 8: Pacific Southwest	CA	6	Is the species sensitive to changes in chemical concentration (e.g. elevated atmospheric CO2, change in water pH, or dissolved oxygen tolerance)?			Chemistry	No	Downlisted in 2022
110 (Downlisted)	Dipodomys stephensi	Kangaroo rat, Stephens'	Vertebrate	Mammal	FWS Region 8: Pacific Southwest	CA	7	Does the species rely on particular triggers for life cycle events (breeding, migration, color change) that are likely to become out of sync with seasonal changes in resource availability or environmental conditions (phenologic mismatch)?			Phenology	No	Downlisted in 2022
110 (Downlisted)	Dipodomys stephensi	Kangaroo rat, Stephens'	Vertebrate	Mammal	FWS Region 8: Pacific Southwest	CA	8	Is the species is dependent on one or a few other species (e.g. host, pollinator, dominant food item) and may have limited alternatives if the required species declines due to climate change?			Obligate relationships	No	Downlisted in 2022
111	Discus macclintocki	Snail, Iowa Pleistocene	Invertebrate	Mollusk	FWS Region 3: Midwest	IL, IA	1	Does the species have specialized thermal tolerance (e.g. pika, trout) or depend on habitat with an important temperature threshold (e.g. sea ice)?	Cold climate species that requires cold, algific talus slopes. Highly sensitive to warming temperatures.	five-year review (http://ecos.fws.gov/docs/five_year_review/doc4339.pdf)	Temperature	Yes
111	Discus macclintocki	Snail, Iowa Pleistocene	Invertebrate	Mollusk	FWS Region 3: Midwest	IL, IA	2	Is the species dependent on habitat with specialized hydrology pattern (e.g. wetland, vernal pool, seasonal streams; sensitivity to drought)?			Hydrology	No
111	Discus macclintocki	Snail, Iowa Pleistocene	Invertebrate	Mollusk	FWS Region 3: Midwest	IL, IA	3	Is the species or its habitat sensitive to or dependent upon a certain disturbance regime (e.g. old growth forest, fire-adapted system; seasonal floods)?			Disturbance	No
111	Discus macclintocki	Snail, Iowa Pleistocene	Invertebrate	Mollusk	FWS Region 3: Midwest	IL, IA	4	Is the species or its habitat geographically restricted or confined by natural and/or anthropogenic barriers (e.g. mountain range, isolated soil type, coastal zone or island, or hemmed in by urban development)?			Isolation	No
111	Discus macclintocki	Snail, Iowa Pleistocene	Invertebrate	Mollusk	FWS Region 3: Midwest	IL, IA	5	Is the species or its habitat threatened by the spread of invasive or “out of balance” species (e.g. weed, forest pest, novel disease)?	Invasive plants such as the garlic mustard and stinging nettle threaten this species' habitat.	five-year review (http://ecos.fws.gov/docs/five_year_review/doc4339.pdf)	Injurious species	Yes
111	Discus macclintocki	Snail, Iowa Pleistocene	Invertebrate	Mollusk	FWS Region 3: Midwest	IL, IA	6	Is the species sensitive to changes in chemical concentration (e.g. elevated atmospheric CO2, change in water pH, or dissolved oxygen tolerance)?			Chemistry	No
111	Discus macclintocki	Snail, Iowa Pleistocene	Invertebrate	Mollusk	FWS Region 3: Midwest	IL, IA	7	Does the species rely on particular triggers for life cycle events (breeding, migration, color change) that are likely to become out of sync with seasonal changes in resource availability or environmental conditions (phenologic mismatch)?			Phenology	No
111	Discus macclintocki	Snail, Iowa Pleistocene	Invertebrate	Mollusk	FWS Region 3: Midwest	IL, IA	8	Is the species is dependent on one or a few other species (e.g. host, pollinator, dominant food item) and may have limited alternatives if the required species declines due to climate change?			Obligate relationships	No
112	Dromus dromas	Pearlymussel, dromedary	Invertebrate	Mollusk	FWS Region 4: Southeast	AL, TN, VA	1	Does the species have specialized thermal tolerance (e.g. pika, trout) or depend on habitat with an important temperature threshold (e.g. sea ice)?			Temperature	No
112	Dromus dromas	Pearlymussel, dromedary	Invertebrate	Mollusk	FWS Region 4: Southeast	AL, TN, VA	2	Is the species dependent on habitat with specialized hydrology pattern (e.g. wetland, vernal pool, seasonal streams; sensitivity to drought)?	Found in water of varying depth and current speed	Natureserve	Hydrology	No
112	Dromus dromas	Pearlymussel, dromedary	Invertebrate	Mollusk	FWS Region 4: Southeast	AL, TN, VA	3	Is the species or its habitat sensitive to or dependent upon a certain disturbance regime (e.g. old growth forest, fire-adapted system; seasonal floods)?	Highly sensitive to sedimentation	Natureserve	Disturbance	Yes
112	Dromus dromas	Pearlymussel, dromedary	Invertebrate	Mollusk	FWS Region 4: Southeast	AL, TN, VA	4	Is the species or its habitat geographically restricted or confined by natural and/or anthropogenic barriers (e.g. mountain range, isolated soil type, coastal zone or island, or hemmed in by urban development)?	Historic/potential occurrence in multiple river systems in four states	Natureserve	Isolation	No
112	Dromus dromas	Pearlymussel, dromedary	Invertebrate	Mollusk	FWS Region 4: Southeast	AL, TN, VA	5	Is the species or its habitat threatened by the spread of invasive or “out of balance” species (e.g. weed, forest pest, novel disease)?			Injurious species	No
112	Dromus dromas	Pearlymussel, dromedary	Invertebrate	Mollusk	FWS Region 4: Southeast	AL, TN, VA	6	Is the species sensitive to changes in chemical concentration (e.g. elevated atmospheric CO2, change in water pH, or dissolved oxygen tolerance)?	Sensitive to low oxygen concentration	Natureserve	Chemistry	Yes
112	Dromus dromas	Pearlymussel, dromedary	Invertebrate	Mollusk	FWS Region 4: Southeast	AL, TN, VA	7	Does the species rely on particular triggers for life cycle events (breeding, migration, color change) that are likely to become out of sync with seasonal changes in resource availability or environmental conditions (phenologic mismatch)?			Phenology	No
112	Dromus dromas	Pearlymussel, dromedary	Invertebrate	Mollusk	FWS Region 4: Southeast	AL, TN, VA	8	Is the species is dependent on one or a few other species (e.g. host, pollinator, dominant food item) and may have limited alternatives if the required species declines due to climate change?	multiple glochidial hosts	Natureserve	Obligate relationships	No
113	Drosophila aglaia	Pomace fly, [unnamed]	Invertebrate	Arthropod	FWS Region 1: Pacific	HI	1	Does the species have specialized thermal tolerance (e.g. pika, trout) or depend on habitat with an important temperature threshold (e.g. sea ice)?			Temperature	No
113	Drosophila aglaia	Pomace fly, [unnamed]	Invertebrate	Arthropod	FWS Region 1: Pacific	HI	2	Is the species dependent on habitat with specialized hydrology pattern (e.g. wetland, vernal pool, seasonal streams; sensitivity to drought)?			Hydrology	No
113	Drosophila aglaia	Pomace fly, [unnamed]	Invertebrate	Arthropod	FWS Region 1: Pacific	HI	3	Is the species or its habitat sensitive to or dependent upon a certain disturbance regime (e.g. old growth forest, fire-adapted system; seasonal floods)?			Disturbance	No
113	Drosophila aglaia	Pomace fly, [unnamed]	Invertebrate	Arthropod	FWS Region 1: Pacific	HI	4	Is the species or its habitat geographically restricted or confined by natural and/or anthropogenic barriers (e.g. mountain range, isolated soil type, coastal zone or island, or hemmed in by urban development)?	Restricted to Waianae Mountain Range on the island of Oahu.	Natureserve	Isolation	Yes
113	Drosophila aglaia	Pomace fly, [unnamed]	Invertebrate	Arthropod	FWS Region 1: Pacific	HI	5	Is the species or its habitat threatened by the spread of invasive or “out of balance” species (e.g. weed, forest pest, novel disease)?	"Habitat degradation by introduced ungulates, such as pigs and goats has dramatically altered the native vegetation. . . The invasion of several nonative plants further contributes to the degradation of native forests. . . Predation by introduces wasps and ants" and competition by non-native flies are also a concern.	Natureserve	Injurious species	Yes
113	Drosophila aglaia	Pomace fly, [unnamed]	Invertebrate	Arthropod	FWS Region 1: Pacific	HI	6	Is the species sensitive to changes in chemical concentration (e.g. elevated atmospheric CO2, change in water pH, or dissolved oxygen tolerance)?			Chemistry	No
113	Drosophila aglaia	Pomace fly, [unnamed]	Invertebrate	Arthropod	FWS Region 1: Pacific	HI	7	Does the species rely on particular triggers for life cycle events (breeding, migration, color change) that are likely to become out of sync with seasonal changes in resource availability or environmental conditions (phenologic mismatch)?			Phenology	No
113	Drosophila aglaia	Pomace fly, [unnamed]	Invertebrate	Arthropod	FWS Region 1: Pacific	HI	8	Is the species is dependent on one or a few other species (e.g. host, pollinator, dominant food item) and may have limited alternatives if the required species declines due to climate change?	"Restricted to the natural distribution of its host plant, Urera glabra."	Natureserve	Obligate relationships	Yes
114	Drosophila differens	Pomace fly, [unnamed]	Invertebrate	Arthropod	FWS Region 1: Pacific	HI	1	Does the species have specialized thermal tolerance (e.g. pika, trout) or depend on habitat with an important temperature threshold (e.g. sea ice)?			Temperature	No
114	Drosophila differens	Pomace fly, [unnamed]	Invertebrate	Arthropod	FWS Region 1: Pacific	HI	2	Is the species dependent on habitat with specialized hydrology pattern (e.g. wetland, vernal pool, seasonal streams; sensitivity to drought)?			Hydrology	No
114	Drosophila differens	Pomace fly, [unnamed]	Invertebrate	Arthropod	FWS Region 1: Pacific	HI	3	Is the species or its habitat sensitive to or dependent upon a certain disturbance regime (e.g. old growth forest, fire-adapted system; seasonal floods)?			Disturbance	No
114	Drosophila differens	Pomace fly, [unnamed]	Invertebrate	Arthropod	FWS Region 1: Pacific	HI	4	Is the species or its habitat geographically restricted or confined by natural and/or anthropogenic barriers (e.g. mountain range, isolated soil type, coastal zone or island, or hemmed in by urban development)?	"Endemic to the wet and mesic forests of Molokai. This species is historically known from the following three sites: Hanalilolilo, Kaunuohua and Puu Kolekole (USFWS, 2006a)."	Natureserve	Isolation	Yes
114	Drosophila differens	Pomace fly, [unnamed]	Invertebrate	Arthropod	FWS Region 1: Pacific	HI	5	Is the species or its habitat threatened by the spread of invasive or “out of balance” species (e.g. weed, forest pest, novel disease)?	"Habitat degradation by introduced ungulates, such as pigs and goats has dramatically altered the native vegetation. . . The invasion of several nonative plants further contributes to the degradation of native forests. . . Predation by introduces wasps and ants" and competition by non-native flies are also a concern.	Natureserve	Injurious species	Yes
114	Drosophila differens	Pomace fly, [unnamed]	Invertebrate	Arthropod	FWS Region 1: Pacific	HI	6	Is the species sensitive to changes in chemical concentration (e.g. elevated atmospheric CO2, change in water pH, or dissolved oxygen tolerance)?			Chemistry	No
114	Drosophila differens	Pomace fly, [unnamed]	Invertebrate	Arthropod	FWS Region 1: Pacific	HI	7	Does the species rely on particular triggers for life cycle events (breeding, migration, color change) that are likely to become out of sync with seasonal changes in resource availability or environmental conditions (phenologic mismatch)?			Phenology	No
114	Drosophila differens	Pomace fly, [unnamed]	Invertebrate	Arthropod	FWS Region 1: Pacific	HI	8	Is the species is dependent on one or a few other species (e.g. host, pollinator, dominant food item) and may have limited alternatives if the required species declines due to climate change?	Loss of food plant is one threat.	Natureserve	Obligate relationships	Yes
115	Drosophila digressa	Fly, Hawaii picture-wing	Invertebrate	Arthropod	FWS Region 1: Pacific	HI	1	Does the species have specialized thermal tolerance (e.g. pika, trout) or depend on habitat with an important temperature threshold (e.g. sea ice)?			Temperature	No
115	Drosophila digressa	Fly, Hawaii picture-wing	Invertebrate	Arthropod	FWS Region 1: Pacific	HI	2	Is the species dependent on habitat with specialized hydrology pattern (e.g. wetland, vernal pool, seasonal streams; sensitivity to drought)?	Sensitive to drought	listing decision (http://www.gpo.gov/fdsys/pkg/FR-2013-10-29/pdf/2013-24103.pdf)	Hydrology	Yes
115	Drosophila digressa	Fly, Hawaii picture-wing	Invertebrate	Arthropod	FWS Region 1: Pacific	HI	3	Is the species or its habitat sensitive to or dependent upon a certain disturbance regime (e.g. old growth forest, fire-adapted system; seasonal floods)?	Highly sensitive to fire, particularly repeated fire (habitat destruction), and to hurricanes (direct mortality).	listing decision (http://www.gpo.gov/fdsys/pkg/FR-2013-10-29/pdf/2013-24103.pdf)	Disturbance	Yes
115	Drosophila digressa	Fly, Hawaii picture-wing	Invertebrate	Arthropod	FWS Region 1: Pacific	HI	4	Is the species or its habitat geographically restricted or confined by natural and/or anthropogenic barriers (e.g. mountain range, isolated soil type, coastal zone or island, or hemmed in by urban development)?			Isolation	No
115	Drosophila digressa	Fly, Hawaii picture-wing	Invertebrate	Arthropod	FWS Region 1: Pacific	HI	5	Is the species or its habitat threatened by the spread of invasive or “out of balance” species (e.g. weed, forest pest, novel disease)?	Highly threatened by nonnative ungulates, but probably no climate nexus.	listing decision (http://www.gpo.gov/fdsys/pkg/FR-2013-10-29/pdf/2013-24103.pdf)	Injurious species	No
115	Drosophila digressa	Fly, Hawaii picture-wing	Invertebrate	Arthropod	FWS Region 1: Pacific	HI	6	Is the species sensitive to changes in chemical concentration (e.g. elevated atmospheric CO2, change in water pH, or dissolved oxygen tolerance)?			Chemistry	No
115	Drosophila digressa	Fly, Hawaii picture-wing	Invertebrate	Arthropod	FWS Region 1: Pacific	HI	7	Does the species rely on particular triggers for life cycle events (breeding, migration, color change) that are likely to become out of sync with seasonal changes in resource availability or environmental conditions (phenologic mismatch)?			Phenology	No
115	Drosophila digressa	Fly, Hawaii picture-wing	Invertebrate	Arthropod	FWS Region 1: Pacific	HI	8	Is the species is dependent on one or a few other species (e.g. host, pollinator, dominant food item) and may have limited alternatives if the required species declines due to climate change?	"In contrast to most continental Drosophilidae, many endemic Hawaiian species are highly host-plant-specific (Magnacca et al. 2008, p. 1). Drosophila digressa relies on the decaying stems of Charpentiera spp. and Pisonia spp. for oviposition (to_x000D_ deposit or lay eggs) and larval substrate."	listing decision (http://www.gpo.gov/fdsys/pkg/FR-2013-10-29/pdf/2013-24103.pdf)	Obligate relationships	Yes
116	Drosophila hemipeza	Pomace fly, [unnamed]	Invertebrate	Arthropod	FWS Region 1: Pacific	HI	1	Does the species have specialized thermal tolerance (e.g. pika, trout) or depend on habitat with an important temperature threshold (e.g. sea ice)?			Temperature	No
116	Drosophila hemipeza	Pomace fly, [unnamed]	Invertebrate	Arthropod	FWS Region 1: Pacific	HI	2	Is the species dependent on habitat with specialized hydrology pattern (e.g. wetland, vernal pool, seasonal streams; sensitivity to drought)?			Hydrology	No
116	Drosophila hemipeza	Pomace fly, [unnamed]	Invertebrate	Arthropod	FWS Region 1: Pacific	HI	3	Is the species or its habitat sensitive to or dependent upon a certain disturbance regime (e.g. old growth forest, fire-adapted system; seasonal floods)?			Disturbance	No
116	Drosophila hemipeza	Pomace fly, [unnamed]	Invertebrate	Arthropod	FWS Region 1: Pacific	HI	4	Is the species or its habitat geographically restricted or confined by natural and/or anthropogenic barriers (e.g. mountain range, isolated soil type, coastal zone or island, or hemmed in by urban development)?	Endemic to Oahu	Natureserve	Isolation	Yes
116	Drosophila hemipeza	Pomace fly, [unnamed]	Invertebrate	Arthropod	FWS Region 1: Pacific	HI	5	Is the species or its habitat threatened by the spread of invasive or “out of balance” species (e.g. weed, forest pest, novel disease)?	"Habitat degradation by introduced ungulates, such as pigs and goats has dramatically altered the native vegetation. . . The invasion of several nonative plants further contributes to the degradation of native forests. . . Predation by introduces wasps and ants" and competition by non-native flies are also a concern.	Natureserve	Injurious species	Yes
116	Drosophila hemipeza	Pomace fly, [unnamed]	Invertebrate	Arthropod	FWS Region 1: Pacific	HI	6	Is the species sensitive to changes in chemical concentration (e.g. elevated atmospheric CO2, change in water pH, or dissolved oxygen tolerance)?			Chemistry	No
116	Drosophila hemipeza	Pomace fly, [unnamed]	Invertebrate	Arthropod	FWS Region 1: Pacific	HI	7	Does the species rely on particular triggers for life cycle events (breeding, migration, color change) that are likely to become out of sync with seasonal changes in resource availability or environmental conditions (phenologic mismatch)?			Phenology	No
116	Drosophila hemipeza	Pomace fly, [unnamed]	Invertebrate	Arthropod	FWS Region 1: Pacific	HI	8	Is the species is dependent on one or a few other species (e.g. host, pollinator, dominant food item) and may have limited alternatives if the required species declines due to climate change?	Restricted to the natural distribution of its host plants, one of which is also federaling endangered.	Natureserve	Obligate relationships	Yes
117	Drosophila heteroneura	Pomace fly, [unnamed]	Invertebrate	Arthropod	FWS Region 1: Pacific	HI	1	Does the species have specialized thermal tolerance (e.g. pika, trout) or depend on habitat with an important temperature threshold (e.g. sea ice)?			Temperature	No
117	Drosophila heteroneura	Pomace fly, [unnamed]	Invertebrate	Arthropod	FWS Region 1: Pacific	HI	2	Is the species dependent on habitat with specialized hydrology pattern (e.g. wetland, vernal pool, seasonal streams; sensitivity to drought)?			Hydrology	No
117	Drosophila heteroneura	Pomace fly, [unnamed]	Invertebrate	Arthropod	FWS Region 1: Pacific	HI	3	Is the species or its habitat sensitive to or dependent upon a certain disturbance regime (e.g. old growth forest, fire-adapted system; seasonal floods)?			Disturbance	No
117	Drosophila heteroneura	Pomace fly, [unnamed]	Invertebrate	Arthropod	FWS Region 1: Pacific	HI	4	Is the species or its habitat geographically restricted or confined by natural and/or anthropogenic barriers (e.g. mountain range, isolated soil type, coastal zone or island, or hemmed in by urban development)?	Restricted to volcanic sites on island of Hawaii.	Natureserve	Isolation	Yes
117	Drosophila heteroneura	Pomace fly, [unnamed]	Invertebrate	Arthropod	FWS Region 1: Pacific	HI	5	Is the species or its habitat threatened by the spread of invasive or “out of balance” species (e.g. weed, forest pest, novel disease)?	"Habitat degradation by introduced ungulates, such as pigs and goats has dramatically altered the native vegetation. . . The invasion of several nonative plants further contributes to the degradation of native forests. . . Predation by introduces wasps and ants" and competition by non-native flies are also a concern.	Natureserve	Injurious species	Yes
117	Drosophila heteroneura	Pomace fly, [unnamed]	Invertebrate	Arthropod	FWS Region 1: Pacific	HI	6	Is the species sensitive to changes in chemical concentration (e.g. elevated atmospheric CO2, change in water pH, or dissolved oxygen tolerance)?			Chemistry	No
117	Drosophila heteroneura	Pomace fly, [unnamed]	Invertebrate	Arthropod	FWS Region 1: Pacific	HI	7	Does the species rely on particular triggers for life cycle events (breeding, migration, color change) that are likely to become out of sync with seasonal changes in resource availability or environmental conditions (phenologic mismatch)?			Phenology	No
117	Drosophila heteroneura	Pomace fly, [unnamed]	Invertebrate	Arthropod	FWS Region 1: Pacific	HI	8	Is the species is dependent on one or a few other species (e.g. host, pollinator, dominant food item) and may have limited alternatives if the required species declines due to climate change?	Restricted to the natural distribution of its host plant, Clermontia clermontioides.	Natureserve	Obligate relationships	Yes
118	Drosophila montgomeryi	Pomace fly, [unnamed]	Invertebrate	Arthropod	FWS Region 1: Pacific	HI	1	Does the species have specialized thermal tolerance (e.g. pika, trout) or depend on habitat with an important temperature threshold (e.g. sea ice)?			Temperature	No
118	Drosophila montgomeryi	Pomace fly, [unnamed]	Invertebrate	Arthropod	FWS Region 1: Pacific	HI	2	Is the species dependent on habitat with specialized hydrology pattern (e.g. wetland, vernal pool, seasonal streams; sensitivity to drought)?			Hydrology	No
118	Drosophila montgomeryi	Pomace fly, [unnamed]	Invertebrate	Arthropod	FWS Region 1: Pacific	HI	3	Is the species or its habitat sensitive to or dependent upon a certain disturbance regime (e.g. old growth forest, fire-adapted system; seasonal floods)?			Disturbance	No
118	Drosophila montgomeryi	Pomace fly, [unnamed]	Invertebrate	Arthropod	FWS Region 1: Pacific	HI	4	Is the species or its habitat geographically restricted or confined by natural and/or anthropogenic barriers (e.g. mountain range, isolated soil type, coastal zone or island, or hemmed in by urban development)?	Restricted to Waianae Mountain Range on the island of Oahu.	Natureserve	Isolation	Yes
118	Drosophila montgomeryi	Pomace fly, [unnamed]	Invertebrate	Arthropod	FWS Region 1: Pacific	HI	5	Is the species or its habitat threatened by the spread of invasive or “out of balance” species (e.g. weed, forest pest, novel disease)?	"Habitat degradation by introduced ungulates, such as pigs and goats has dramatically altered the native vegetation. . . The invasion of several nonative plants further contributes to the degradation of native forests. . . Predation by introduces wasps and ants" and competition by non-native flies are also a concern.	Natureserve	Injurious species	Yes
118	Drosophila montgomeryi	Pomace fly, [unnamed]	Invertebrate	Arthropod	FWS Region 1: Pacific	HI	6	Is the species sensitive to changes in chemical concentration (e.g. elevated atmospheric CO2, change in water pH, or dissolved oxygen tolerance)?			Chemistry	No
118	Drosophila montgomeryi	Pomace fly, [unnamed]	Invertebrate	Arthropod	FWS Region 1: Pacific	HI	7	Does the species rely on particular triggers for life cycle events (breeding, migration, color change) that are likely to become out of sync with seasonal changes in resource availability or environmental conditions (phenologic mismatch)?			Phenology	No
118	Drosophila montgomeryi	Pomace fly, [unnamed]	Invertebrate	Arthropod	FWS Region 1: Pacific	HI	8	Is the species is dependent on one or a few other species (e.g. host, pollinator, dominant food item) and may have limited alternatives if the required species declines due to climate change?	Restricted to the natural distribution of its host plant, Urera kaalae.	Natureserve	Obligate relationships	Yes
119	Drosophila musaphila	Pomace fly, [unnamed]	Invertebrate	Arthropod	FWS Region 1: Pacific	HI	1	Does the species have specialized thermal tolerance (e.g. pika, trout) or depend on habitat with an important temperature threshold (e.g. sea ice)?			Temperature	No
119	Drosophila musaphila	Pomace fly, [unnamed]	Invertebrate	Arthropod	FWS Region 1: Pacific	HI	2	Is the species dependent on habitat with specialized hydrology pattern (e.g. wetland, vernal pool, seasonal streams; sensitivity to drought)?			Hydrology	No
119	Drosophila musaphila	Pomace fly, [unnamed]	Invertebrate	Arthropod	FWS Region 1: Pacific	HI	3	Is the species or its habitat sensitive to or dependent upon a certain disturbance regime (e.g. old growth forest, fire-adapted system; seasonal floods)?			Disturbance	No
119	Drosophila musaphila	Pomace fly, [unnamed]	Invertebrate	Arthropod	FWS Region 1: Pacific	HI	4	Is the species or its habitat geographically restricted or confined by natural and/or anthropogenic barriers (e.g. mountain range, isolated soil type, coastal zone or island, or hemmed in by urban development)?	Endemic to Kauai.	Natureserve	Isolation	Yes
119	Drosophila musaphila	Pomace fly, [unnamed]	Invertebrate	Arthropod	FWS Region 1: Pacific	HI	5	Is the species or its habitat threatened by the spread of invasive or “out of balance” species (e.g. weed, forest pest, novel disease)?	Non-native plant invasion increases fire risk.	Five year review: http://ecos.fws.gov/docs/five_year_review/doc4097.pdf	Injurious species	Yes
119	Drosophila musaphila	Pomace fly, [unnamed]	Invertebrate	Arthropod	FWS Region 1: Pacific	HI	6	Is the species sensitive to changes in chemical concentration (e.g. elevated atmospheric CO2, change in water pH, or dissolved oxygen tolerance)?			Chemistry	No
119	Drosophila musaphila	Pomace fly, [unnamed]	Invertebrate	Arthropod	FWS Region 1: Pacific	HI	7	Does the species rely on particular triggers for life cycle events (breeding, migration, color change) that are likely to become out of sync with seasonal changes in resource availability or environmental conditions (phenologic mismatch)?			Phenology	No
119	Drosophila musaphila	Pomace fly, [unnamed]	Invertebrate	Arthropod	FWS Region 1: Pacific	HI	8	Is the species is dependent on one or a few other species (e.g. host, pollinator, dominant food item) and may have limited alternatives if the required species declines due to climate change?	Restricted to the natural distribution of its host plant, Acacia koa.	Natureserve	Obligate relationships	Yes
120	Drosophila neoclavisetae	Pomace fly, [unnamed]	Invertebrate	Arthropod	FWS Region 1: Pacific	HI	1	Does the species have specialized thermal tolerance (e.g. pika, trout) or depend on habitat with an important temperature threshold (e.g. sea ice)?			Temperature	No
120	Drosophila neoclavisetae	Pomace fly, [unnamed]	Invertebrate	Arthropod	FWS Region 1: Pacific	HI	2	Is the species dependent on habitat with specialized hydrology pattern (e.g. wetland, vernal pool, seasonal streams; sensitivity to drought)?			Hydrology	No
120	Drosophila neoclavisetae	Pomace fly, [unnamed]	Invertebrate	Arthropod	FWS Region 1: Pacific	HI	3	Is the species or its habitat sensitive to or dependent upon a certain disturbance regime (e.g. old growth forest, fire-adapted system; seasonal floods)?			Disturbance	No
120	Drosophila neoclavisetae	Pomace fly, [unnamed]	Invertebrate	Arthropod	FWS Region 1: Pacific	HI	4	Is the species or its habitat geographically restricted or confined by natural and/or anthropogenic barriers (e.g. mountain range, isolated soil type, coastal zone or island, or hemmed in by urban development)?	Endemic to west Maui.	Natureserve	Isolation	Yes
120	Drosophila neoclavisetae	Pomace fly, [unnamed]	Invertebrate	Arthropod	FWS Region 1: Pacific	HI	5	Is the species or its habitat threatened by the spread of invasive or “out of balance” species (e.g. weed, forest pest, novel disease)?	"The habitat of this picture-wing fly and Cyanea spp., the unconfirmed larval stage host plant, is threatened by nonnative plants, possible tipulid competition, and predation by yellowjacket wasps."	five-year review: http://ecos.fws.gov/docs/five_year_review/doc4096.pdf	Injurious species	Yes
120	Drosophila neoclavisetae	Pomace fly, [unnamed]	Invertebrate	Arthropod	FWS Region 1: Pacific	HI	6	Is the species sensitive to changes in chemical concentration (e.g. elevated atmospheric CO2, change in water pH, or dissolved oxygen tolerance)?			Chemistry	No
120	Drosophila neoclavisetae	Pomace fly, [unnamed]	Invertebrate	Arthropod	FWS Region 1: Pacific	HI	7	Does the species rely on particular triggers for life cycle events (breeding, migration, color change) that are likely to become out of sync with seasonal changes in resource availability or environmental conditions (phenologic mismatch)?			Phenology	No
120	Drosophila neoclavisetae	Pomace fly, [unnamed]	Invertebrate	Arthropod	FWS Region 1: Pacific	HI	8	Is the species is dependent on one or a few other species (e.g. host, pollinator, dominant food item) and may have limited alternatives if the required species declines due to climate change?	Host plant is one or at most two Cyanea species.	five-year review: http://ecos.fws.gov/docs/five_year_review/doc4096.pdf	Obligate relationships	Yes
121	Drosophila obatai	Pomace fly, [unnamed]	Invertebrate	Arthropod	FWS Region 1: Pacific	HI	1	Does the species have specialized thermal tolerance (e.g. pika, trout) or depend on habitat with an important temperature threshold (e.g. sea ice)?			Temperature	No
121	Drosophila obatai	Pomace fly, [unnamed]	Invertebrate	Arthropod	FWS Region 1: Pacific	HI	2	Is the species dependent on habitat with specialized hydrology pattern (e.g. wetland, vernal pool, seasonal streams; sensitivity to drought)?			Hydrology	No
121	Drosophila obatai	Pomace fly, [unnamed]	Invertebrate	Arthropod	FWS Region 1: Pacific	HI	3	Is the species or its habitat sensitive to or dependent upon a certain disturbance regime (e.g. old growth forest, fire-adapted system; seasonal floods)?			Disturbance	No
121	Drosophila obatai	Pomace fly, [unnamed]	Invertebrate	Arthropod	FWS Region 1: Pacific	HI	4	Is the species or its habitat geographically restricted or confined by natural and/or anthropogenic barriers (e.g. mountain range, isolated soil type, coastal zone or island, or hemmed in by urban development)?	"Restricted to two mountain ranges on the island on Oahu."	Natureserve	Isolation	Yes
121	Drosophila obatai	Pomace fly, [unnamed]	Invertebrate	Arthropod	FWS Region 1: Pacific	HI	5	Is the species or its habitat threatened by the spread of invasive or “out of balance” species (e.g. weed, forest pest, novel disease)?	"Habitat degradation by introduced ungulates, such as pigs and goats has dramatically altered the native vegetation. . . The invasion of several nonative plants further contributes to the degradation of native forests. . . Predation by introduces wasps and ants" and competition by non-native flies are also a concern.	Natureserve	Injurious species	Yes
121	Drosophila obatai	Pomace fly, [unnamed]	Invertebrate	Arthropod	FWS Region 1: Pacific	HI	6	Is the species sensitive to changes in chemical concentration (e.g. elevated atmospheric CO2, change in water pH, or dissolved oxygen tolerance)?			Chemistry	No
121	Drosophila obatai	Pomace fly, [unnamed]	Invertebrate	Arthropod	FWS Region 1: Pacific	HI	7	Does the species rely on particular triggers for life cycle events (breeding, migration, color change) that are likely to become out of sync with seasonal changes in resource availability or environmental conditions (phenologic mismatch)?			Phenology	No
121	Drosophila obatai	Pomace fly, [unnamed]	Invertebrate	Arthropod	FWS Region 1: Pacific	HI	8	Is the species is dependent on one or a few other species (e.g. host, pollinator, dominant food item) and may have limited alternatives if the required species declines due to climate change?	"The host plant species for D. obatai, Pleomele forbesii and P. aurea, are rare or sparsely distributed and threatened by ongoing habitat degradation."	Natureserve	Obligate relationships	Yes
122	Drosophila ochrobasis	Pomace fly, [unnamed]	Invertebrate	Arthropod	FWS Region 1: Pacific	HI	1	Does the species have specialized thermal tolerance (e.g. pika, trout) or depend on habitat with an important temperature threshold (e.g. sea ice)?			Temperature	No
122	Drosophila ochrobasis	Pomace fly, [unnamed]	Invertebrate	Arthropod	FWS Region 1: Pacific	HI	2	Is the species dependent on habitat with specialized hydrology pattern (e.g. wetland, vernal pool, seasonal streams; sensitivity to drought)?			Hydrology	No
122	Drosophila ochrobasis	Pomace fly, [unnamed]	Invertebrate	Arthropod	FWS Region 1: Pacific	HI	3	Is the species or its habitat sensitive to or dependent upon a certain disturbance regime (e.g. old growth forest, fire-adapted system; seasonal floods)?			Disturbance	No
122	Drosophila ochrobasis	Pomace fly, [unnamed]	Invertebrate	Arthropod	FWS Region 1: Pacific	HI	4	Is the species or its habitat geographically restricted or confined by natural and/or anthropogenic barriers (e.g. mountain range, isolated soil type, coastal zone or island, or hemmed in by urban development)?	It is now only known from one site on the Puu O Umi Preserve, Kohala Mountains (USFWS 2012).	Natureserve	Isolation	Yes
122	Drosophila ochrobasis	Pomace fly, [unnamed]	Invertebrate	Arthropod	FWS Region 1: Pacific	HI	5	Is the species or its habitat threatened by the spread of invasive or “out of balance” species (e.g. weed, forest pest, novel disease)?	"Habitat degradation by introduced ungulates, such as pigs and goats has dramatically altered the native vegetation. . . The invasion of several nonative plants further contributes to the degradation of native forests. . . Predation by introduces wasps and ants" and competition by non-native flies are also a concern.	Natureserve	Injurious species	Yes
122	Drosophila ochrobasis	Pomace fly, [unnamed]	Invertebrate	Arthropod	FWS Region 1: Pacific	HI	6	Is the species sensitive to changes in chemical concentration (e.g. elevated atmospheric CO2, change in water pH, or dissolved oxygen tolerance)?			Chemistry	No
122	Drosophila ochrobasis	Pomace fly, [unnamed]	Invertebrate	Arthropod	FWS Region 1: Pacific	HI	7	Does the species rely on particular triggers for life cycle events (breeding, migration, color change) that are likely to become out of sync with seasonal changes in resource availability or environmental conditions (phenologic mismatch)?			Phenology	No
122	Drosophila ochrobasis	Pomace fly, [unnamed]	Invertebrate	Arthropod	FWS Region 1: Pacific	HI	8	Is the species is dependent on one or a few other species (e.g. host, pollinator, dominant food item) and may have limited alternatives if the required species declines due to climate change?	Three host plant species.	Natureserve	Obligate relationships	Yes
123	Drosophila sharpi	Fly, Hawaii picture-wing	Invertebrate	Arthropod	FWS Region 1: Pacific	HI	1	Does the species have specialized thermal tolerance (e.g. pika, trout) or depend on habitat with an important temperature threshold (e.g. sea ice)?			Temperature	No
123	Drosophila sharpi	Fly, Hawaii picture-wing	Invertebrate	Arthropod	FWS Region 1: Pacific	HI	2	Is the species dependent on habitat with specialized hydrology pattern (e.g. wetland, vernal pool, seasonal streams; sensitivity to drought)?			Hydrology	No
123	Drosophila sharpi	Fly, Hawaii picture-wing	Invertebrate	Arthropod	FWS Region 1: Pacific	HI	3	Is the species or its habitat sensitive to or dependent upon a certain disturbance regime (e.g. old growth forest, fire-adapted system; seasonal floods)?	Hurricanes and landslides are a concern	listing decision: https://www.federalregister.gov/documents/2010/04/13/2010-1904/endangered-and-threatened-wildlife-and-plants-determination-of-endangered-status-for-48-species-on	Disturbance	Yes
123	Drosophila sharpi	Fly, Hawaii picture-wing	Invertebrate	Arthropod	FWS Region 1: Pacific	HI	4	Is the species or its habitat geographically restricted or confined by natural and/or anthropogenic barriers (e.g. mountain range, isolated soil type, coastal zone or island, or hemmed in by urban development)?	Montane mesic habitat on Kauai	listing decision: https://www.federalregister.gov/documents/2010/04/13/2010-1904/endangered-and-threatened-wildlife-and-plants-determination-of-endangered-status-for-48-species-on	Isolation	Yes
123	Drosophila sharpi	Fly, Hawaii picture-wing	Invertebrate	Arthropod	FWS Region 1: Pacific	HI	5	Is the species or its habitat threatened by the spread of invasive or “out of balance” species (e.g. weed, forest pest, novel disease)?	non-native ungulates	listing decision: https://www.federalregister.gov/documents/2010/04/13/2010-1904/endangered-and-threatened-wildlife-and-plants-determination-of-endangered-status-for-48-species-on	Injurious species	No
123	Drosophila sharpi	Fly, Hawaii picture-wing	Invertebrate	Arthropod	FWS Region 1: Pacific	HI	6	Is the species sensitive to changes in chemical concentration (e.g. elevated atmospheric CO2, change in water pH, or dissolved oxygen tolerance)?			Chemistry	No
123	Drosophila sharpi	Fly, Hawaii picture-wing	Invertebrate	Arthropod	FWS Region 1: Pacific	HI	7	Does the species rely on particular triggers for life cycle events (breeding, migration, color change) that are likely to become out of sync with seasonal changes in resource availability or environmental conditions (phenologic mismatch)?			Phenology	No
123	Drosophila sharpi	Fly, Hawaii picture-wing	Invertebrate	Arthropod	FWS Region 1: Pacific	HI	8	Is the species is dependent on one or a few other species (e.g. host, pollinator, dominant food item) and may have limited alternatives if the required species declines due to climate change?	"For example, the presence of specific host plants for larval development is essential for the conservation of the picture-wing fly Drosophila sharpi. the host plants for D. sharpi are believed to be species of native Cheirodendron and Tetraplasandra."	listing decision: https://www.federalregister.gov/documents/2010/04/13/2010-1904/endangered-and-threatened-wildlife-and-plants-determination-of-endangered-status-for-48-species-on	Obligate relationships	Yes
124	Drosophila substenoptera	Pomace fly, [unnamed]	Invertebrate	Arthropod	FWS Region 1: Pacific	HI	1	Does the species have specialized thermal tolerance (e.g. pika, trout) or depend on habitat with an important temperature threshold (e.g. sea ice)?			Temperature	No
124	Drosophila substenoptera	Pomace fly, [unnamed]	Invertebrate	Arthropod	FWS Region 1: Pacific	HI	2	Is the species dependent on habitat with specialized hydrology pattern (e.g. wetland, vernal pool, seasonal streams; sensitivity to drought)?			Hydrology	No
124	Drosophila substenoptera	Pomace fly, [unnamed]	Invertebrate	Arthropod	FWS Region 1: Pacific	HI	3	Is the species or its habitat sensitive to or dependent upon a certain disturbance regime (e.g. old growth forest, fire-adapted system; seasonal floods)?			Disturbance	No
124	Drosophila substenoptera	Pomace fly, [unnamed]	Invertebrate	Arthropod	FWS Region 1: Pacific	HI	4	Is the species or its habitat geographically restricted or confined by natural and/or anthropogenic barriers (e.g. mountain range, isolated soil type, coastal zone or island, or hemmed in by urban development)?	"In 1997, there were two localities on the Waianae Range and one on the Koolau Range. It is now only known to occur on the summit of Mt. Kaala (USFWS, 2006a)."	Natureserve	Isolation	Yes
124	Drosophila substenoptera	Pomace fly, [unnamed]	Invertebrate	Arthropod	FWS Region 1: Pacific	HI	5	Is the species or its habitat threatened by the spread of invasive or “out of balance” species (e.g. weed, forest pest, novel disease)?	"Habitat degradation by introduced ungulates, such as pigs and goats has dramatically altered the native vegetation. . . The invasion of several nonative plants further contributes to the degradation of native forests. . . Predation by introduces wasps and ants" and competition by non-native flies are also a concern.	Natureserve	Injurious species	Yes
124	Drosophila substenoptera	Pomace fly, [unnamed]	Invertebrate	Arthropod	FWS Region 1: Pacific	HI	6	Is the species sensitive to changes in chemical concentration (e.g. elevated atmospheric CO2, change in water pH, or dissolved oxygen tolerance)?			Chemistry	No
124	Drosophila substenoptera	Pomace fly, [unnamed]	Invertebrate	Arthropod	FWS Region 1: Pacific	HI	7	Does the species rely on particular triggers for life cycle events (breeding, migration, color change) that are likely to become out of sync with seasonal changes in resource availability or environmental conditions (phenologic mismatch)?			Phenology	No
124	Drosophila substenoptera	Pomace fly, [unnamed]	Invertebrate	Arthropod	FWS Region 1: Pacific	HI	8	Is the species is dependent on one or a few other species (e.g. host, pollinator, dominant food item) and may have limited alternatives if the required species declines due to climate change?	"Inhabits rain forest communities, and is associated with Cheirodendron and Tetraplasandra (decaying bark) (Montgomery, 1975)."	Natureserve	Obligate relationships	Yes
125	Drosophila tarphytrichia	Pomace fly, [unnamed]	Invertebrate	Arthropod	FWS Region 1: Pacific	HI	1	Does the species have specialized thermal tolerance (e.g. pika, trout) or depend on habitat with an important temperature threshold (e.g. sea ice)?			Temperature	No
[truncated: 2,783 more rows]
